# Supplementary material for: Correlated S -palmitoylation profiling of Snail-induced epithelial to mesenchymal transition
Source: Royal Society of Chemistry journal article supplement (doi:10.1039/c6mb00019c), 2016-03-18

## Supplementary Information

Correlated S-palmitoylation profiling of Snail-induced epithelial to mesenchymal transition

Jeannie L. Hernandez<sup>1</sup>, Dahvid Davda<sup>1,2</sup>, Jaimeen D. Majmudar<sup>1</sup>, Sang Joon Won<sup>2</sup>, Ashesh Prakash<sup>1</sup>, Alexandria I. Choi<sup>1</sup>, and Brent R. Martin<sup>1,2\*</sup>

<sup>1</sup>Department of Chemistry, <sup>2</sup>Program in Chemical Biology, University of Michigan, 930 N. University Ave., Ann Arbor, MI 48109

\*Correspondence should be sent to [brentm@umich.edu](mailto:brentm@umich.edu)

**Supplementary Figure 1.** Selected gene ontology analysis of bi-directional SILAC analysis in MCF10A cells with or without Snail transduction. Asterisks denote bi-directional SILAC ratios that are statistically equivalent.

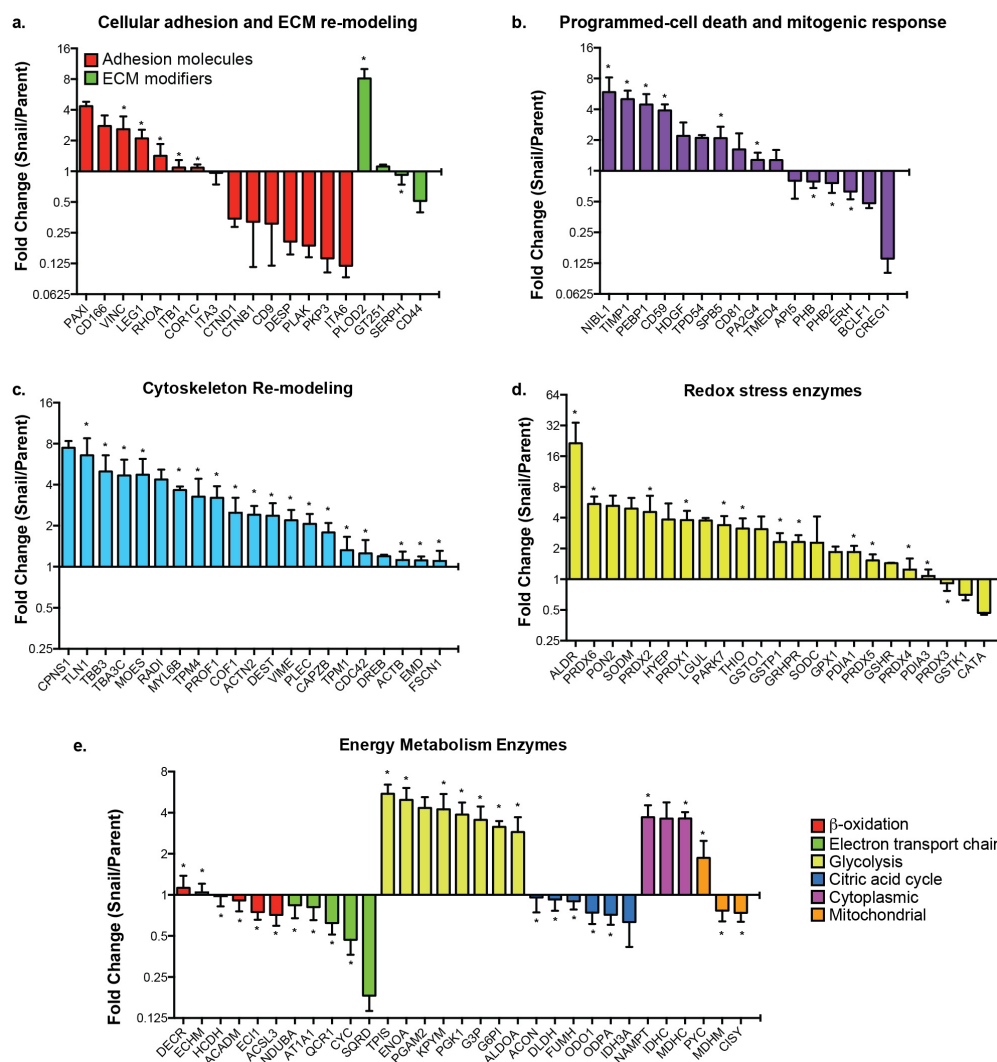

**Supplementary Figure 2.** Acyl biotin exchange analysis of several putatively palmitoylated proteins. Hydroxylamine is abbreviated as NH<sub>2</sub>OH.

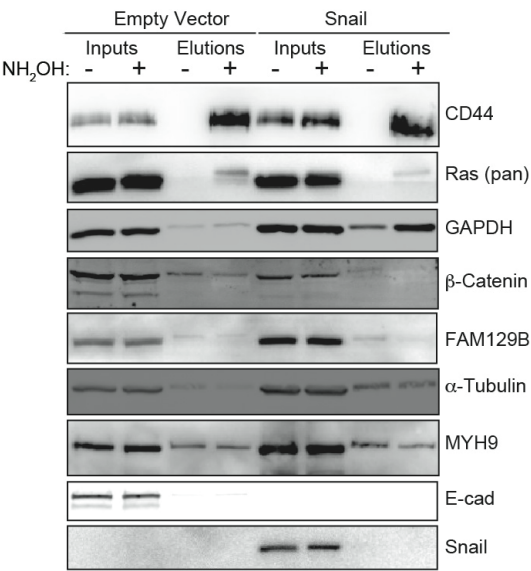

Supplement: c6mb00019c1.pdf [file c6mb00019c1.pdf]
