# Supplementary material for: Correlated S -palmitoylation profiling of Snail-induced epithelial to mesenchymal transition
Source: Royal Society of Chemistry journal article supplement (doi:10.1039/c6mb00019c), 2016-03-18
Supplement: c6mb00019c2.xlsx [file c6mb00019c2.xlsx]

## Sheet: Table S1 - Abundance
Supplementary Table 1. SILAC analysis of unenriched MCF10A cells transduced with Snail or empty vector.
Protein Entry: Uniprot protein entry term
Uniprot Accession: Uniprot protein accession
Protein Description: Protein Name
SILAC Ratio: SILAC quantification ratio (Snail/Empty Vector) of MS1 and MS2 ratios
Standard Deviation: Overall standard deviation
Quantified Events: Total number of MS1 and MS2 SILAC ratios computed per protein
Directional Equivalence: Denotes whether the protein SILAC ratios in both directions meet the TOST test ( see Statistical analysis section for more details)
p value: one-sample, two-tailed p-value against the expected ratio of 1
Neg log10 p value: Negative logarithm (base 10) of p value
Protein Entry	Uniprot Accession	Protein Description	SILAC Ratio (Snail/Empty Vector)	Standard Deviation	Total MS1/MS2 events quantified	Directions Protein Quantified in	Directional Equicalence?	p value	Neg log10 p value
P15121	ALDR_HUMAN	Aldose reductase	21.4413	12.6845	32	2	Yes	3.77215e-10	9.42341
Q04828	AK1C1_HUMAN	Aldo-keto reductase family 1 member C1	15.2663	1.44124	5	1	n/a	2.46623e-05	4.60797
P52895	AK1C2_HUMAN	Aldo-keto reductase family 1 member C2	14.5172	1.43194	3	1	n/a	0.00371986	2.42947
Q99584	S10AD_HUMAN	Protein S100-A13	10.1683	2.2427	23	2	Yes	5.5834e-15	14.2531
P08758	ANXA5_HUMAN	Annexin A5	8.24895	2.17649	52	2	Yes	4.10505e-29	28.3867
O00469	PLOD2_HUMAN	Procollagen-lysine,2-oxoglutarate 5-dioxygenase 2	8.13271	1.90361	43	2	Yes	3.7735e-26	25.4233
Q14847	LASP1_HUMAN	LIM and SH3 domain protein 1	7.55408	3.65633	5	1	n/a	0.0160203	1.79533
P04632	CPNS1_HUMAN	Calpain small subunit 1	7.4641	0.910481	4	1	n/a	0.000756779	3.12103
Q16555	DPYL2_HUMAN	Dihydropyrimidinase-related protein 2	7.28026	1.97559	51	2	Yes	1.17413e-27	26.9303
O60664	PLIN3_HUMAN	Perilipin-3	6.77853	1.99524	54	2	Yes	2.49168e-27	26.6035
Q9Y490	TLN1_HUMAN	Talin-1	6.5689	2.19417	136	2	Yes	1.23727e-60	59.9075
Q96TA1	NIBL1_HUMAN	Niban-like protein 1	5.87871	2.30742	25	2	Yes	2.65027e-10	9.57671
P11216	PYGB_HUMAN	Glycogen phosphorylase, brain form	5.78891	2.01515	123	2	Yes	5.70962e-52	51.2434
P40261	NNMT_HUMAN	Nicotinamide N-methyltransferase	5.70661	1.76272	37	2	Yes	7.15597e-18	17.1453
P60174	TPIS_HUMAN	Triosephosphate isomerase	5.51347	0.914238	200	2	Yes	2.06141e-141	140.686
P30041	PRDX6_HUMAN	Peroxiredoxin-6	5.45143	0.998082	75	2	Yes	2.46497e-50	49.6082
A6NHL2	TBAL3_HUMAN	Tubulin alpha chain-like 3	5.28839	1.07181	31	2	Yes	8.66513e-20	19.0622
Q9Y696	CLIC4_HUMAN	Chloride intracellular channel protein 4	5.25203	0.612832	4	1	n/a	0.000810133	3.09144
P07437	TBB5_HUMAN	Tubulin beta chain	5.24158	1.41473	395	2	Yes	6.78264e-199	198.169
Q15165	PON2_HUMAN	Serum paraoxonase/arylesterase 2	5.23643	1.35374	33	2	No	5.95098e-18	17.2254
P00367	DHE3_HUMAN	Glutamate dehydrogenase 1, mitochondrial	5.2282	1.3006	406	2	Yes	2.74079e-217	216.562
P49448	DHE4_HUMAN	Glutamate dehydrogenase 2, mitochondrial	5.19001	1.22049	249	2	Yes	4.38955e-139	138.358
Q9H853	TBA4B_HUMAN	Putative tubulin-like protein alpha-4B	5.17579	0.501635	19	2	Yes	1.50979e-17	16.8211
Q9BUF5	TBB6_HUMAN	Tubulin beta-6 chain	5.12508	1.11201	108	2	Yes	3.4566e-64	63.4614
Q13885	TBB2A_HUMAN	Tubulin beta-2A chain	5.11823	1.35233	312	2	Yes	2.94512e-159	158.531
Q9BVA1	TBB2B_HUMAN	Tubulin beta-2B chain	5.11273	1.35085	313	2	Yes	9.80691e-160	159.008
Q9H1E3	NUCKS_HUMAN	Nuclear ubiquitous casein and cyclin-dependent kinase substrate 1	5.09682	1.24159	5	1	n/a	0.00179864	2.74505
O43237	DC1L2_HUMAN	Cytoplasmic dynein 1 light intermediate chain 2	5.0581	0.220656	3	1	n/a	0.000984062	3.00698
Q3ZCM7	TBB8_HUMAN	Tubulin beta-8 chain	5.04196	1.03517	82	2	Yes	1.34705e-50	49.8706
Q9BQE3	TBA1C_HUMAN	Tubulin alpha-1C chain	5.0323	1.25565	264	2	Yes	2.0011e-140	139.699
P01033	TIMP1_HUMAN	Metalloproteinase inhibitor 1	5.0199	1.06368	13	2	Yes	3.11873e-08	7.50602
Q13509	TBB3_HUMAN	Tubulin beta-3 chain	5.00423	1.5725	227	2	Yes	1.09531e-100	99.9605
P68363	TBA1B_HUMAN	Tubulin alpha-1B chain	4.99886	1.21851	285	2	Yes	6.07492e-154	153.216
Q9H4B7	TBB1_HUMAN	Tubulin beta-1 chain	4.97967	0.109954	6	2	Yes	9.70367e-08	7.01306
P06733	ENOA_HUMAN	Alpha-enolase	4.97165	1.10848	475	2	Yes	2.07145e-272	271.684
P68371	TBB4B_HUMAN	Tubulin beta-4B chain	4.94661	1.37104	331	2	Yes	1.1815e-161	160.928
A6NNZ2	TBB8L_HUMAN	Tubulin beta-8 chain-like protein LOC260334	4.93074	0.852665	49	2	Yes	1.00747e-33	32.9968
Q71U36	TBA1A_HUMAN	Tubulin alpha-1A chain	4.92939	1.32522	268	2	Yes	3.4634e-134	133.46
P04179	SODM_HUMAN	Superoxide dismutase [Mn], mitochondrial	4.92862	1.3222	40	2	No	7.79556e-21	20.1082
P68366	TBA4A_HUMAN	Tubulin alpha-4A chain	4.88935	1.19536	180	2	Yes	5.10843e-97	96.2917
Q9NY65	TBA8_HUMAN	Tubulin alpha-8 chain	4.86615	0.967924	123	2	Yes	1.24643e-76	75.9043
P04350	TBB4A_HUMAN	Tubulin beta-4A chain	4.77565	1.33236	227	2	Yes	7.04887e-110	109.152
P26038	MOES_HUMAN	Moesin	4.74023	1.44698	73	2	Yes	1.57359e-33	32.8031
Q14764	MVP_HUMAN	Major vault protein	4.73516	2.06364	11	2	No	0.000201744	3.6952
P40121	CAPG_HUMAN	Macrophage-capping protein	4.71984	0.801509	44	2	Yes	1.9016e-30	29.7209
Q6PEY2	TBA3E_HUMAN	Tubulin alpha-3E chain	4.70629	1.43832	181	2	Yes	2.46615e-81	80.608
Q13748	TBA3C_HUMAN	Tubulin alpha-3C/D chain	4.67307	1.4236	199	2	Yes	2.12767e-89	88.6721
P30613	KPYR_HUMAN	Pyruvate kinase PKLR	4.65314	0.787765	26	2	Yes	3.8821e-18	17.4109
P09104	ENOG_HUMAN	Gamma-enolase	4.62285	1.47263	87	2	Yes	3.50701e-38	37.4551
P07108	ACBP_HUMAN	Acyl-CoA-binding protein	4.58682	1.95075	8	1	n/a	0.00125218	2.90233
P32119	PRDX2_HUMAN	Peroxiredoxin-2	4.55797	1.99986	64	2	Yes	3.35027e-21	20.4749
P37837	TALDO_HUMAN	Transaldolase	4.55774	0.563276	12	1	n/a	2.03458e-10	9.69153
P11766	ADHX_HUMAN	Alcohol dehydrogenase class-3	4.52876	1.95384	16	2	Yes	4.39586e-06	5.35696
P35579	MYH9_HUMAN	Myosin-9	4.46042	1.26558	328	2	Yes	9.84113e-154	153.007
P30086	PEBP1_HUMAN	Phosphatidylethanolamine-binding protein 1	4.45926	1.17352	37	2	Yes	3.22157e-19	18.4919
P63173	RL38_HUMAN	60S ribosomal protein L38	4.45304	0.548383	12	2	No	9.17516e-10	9.03739
P13929	ENOB_HUMAN	Beta-enolase	4.41987	1.24991	100	2	Yes	1.10801e-47	46.9555
P35241	RADI_HUMAN	Radixin	4.36611	0.801549	9	1	n/a	1.47824e-06	5.83026
P00966	ASSY_HUMAN	Argininosuccinate synthase	4.3658	0.30588	4	1	n/a	0.000205377	3.68745
P49023	PAXI_HUMAN	Paxillin	4.34778	0.455212	3	1	n/a	0.00610659	2.2142
P15259	PGAM2_HUMAN	Phosphoglycerate mutase 2	4.33857	0.859833	16	1	n/a	1.18655e-10	9.92571
P35749	MYH11_HUMAN	Myosin-11	4.26708	1.68305	50	2	Yes	3.07706e-18	17.5119
P14618	KPYM_HUMAN	Pyruvate kinase PKM	4.24649	1.23693	505	2	Yes	4.0289e-228	227.395
Q8N0Y7	PGAM4_HUMAN	Probable phosphoglycerate mutase 4	4.23225	0.953814	40	2	Yes	8.03303e-23	22.0951
P29401	TKT_HUMAN	Transketolase	4.20454	0.915689	269	2	Yes	3.17432e-152	151.498
P36871	PGM1_HUMAN	Phosphoglucomutase-1	4.20309	1.30521	15	1	n/a	1.74619e-07	6.75791
P18669	PGAM1_HUMAN	Phosphoglycerate mutase 1	4.19796	0.886368	75	2	Yes	5.4026e-44	43.2674
P52209	6PGD_HUMAN	6-phosphogluconate dehydrogenase, decarboxylating	4.08754	0.813602	39	2	Yes	5.78191e-24	23.2379
P00338	LDHA_HUMAN	L-lactate dehydrogenase A chain	3.90324	0.89186	325	2	Yes	2.40009e-174	173.62
P13987	CD59_HUMAN	CD59 glycoprotein	3.89682	0.577683	45	2	Yes	1.61331e-32	31.7923
P00558	PGK1_HUMAN	Phosphoglycerate kinase 1	3.87672	0.874234	179	2	Yes	2.80953e-97	96.5514
P07099	HYEP_HUMAN	Epoxide hydrolase 1	3.84692	1.66826	13	1	n/a	4.92442e-05	4.30764
P49773	HINT1_HUMAN	Histidine triad nucleotide-binding protein 1	3.826	0.753515	5	1	n/a	0.00110612	2.9562
P22314	UBA1_HUMAN	Ubiquitin-like modifier-activating enzyme 1	3.80595	1.04683	101	2	Yes	2.28381e-47	46.6413
Q06830	PRDX1_HUMAN	Peroxiredoxin-1	3.79469	0.874629	165	2	Yes	7.57208e-88	87.1208
P04792	HSPB1_HUMAN	Heat shock protein beta-1	3.75742	1.71935	29	2	Yes	2.98538e-09	8.525
Q04760	LGUL_HUMAN	Lactoylglutathione lyase	3.75617	0.224385	7	1	n/a	5.64516e-08	7.24832
P68402	PA1B2_HUMAN	Platelet-activating factor acetylhydrolase IB subunit beta	3.72385	0.757472	16	2	Yes	8.85329e-10	9.0529
P52565	GDIR1_HUMAN	Rho GDP-dissociation inhibitor 1	3.72254	0.841105	10	2	Yes	7.13037e-06	5.14689
Q7Z406	MYH14_HUMAN	Myosin-14	3.71441	1.76466	18	2	No	6.9836e-06	5.15592
P43490	NAMPT_HUMAN	Nicotinamide phosphoribosyltransferase	3.70896	0.828742	28	2	Yes	8.79424e-16	15.0558
P14649	MYL6B_HUMAN	Myosin light chain 6B	3.65781	0.224721	30	2	Yes	4.73414e-32	31.3248
P35580	MYH10_HUMAN	Myosin-10	3.63956	0.824183	11	1	n/a	9.11876e-07	6.04006
P40925	MDHC_HUMAN	Malate dehydrogenase, cytoplasmic	3.63134	0.413646	28	2	Yes	5.70322e-23	22.2439
P60660	MYL6_HUMAN	Myosin light polypeptide 6	3.62926	0.748688	119	2	Yes	4.74852e-68	67.3234
O75874	IDHC_HUMAN	Isocitrate dehydrogenase [NADP] cytoplasmic	3.62402	1.1447	20	1	n/a	3.52206e-09	8.4532
P21291	CSRP1_HUMAN	Cysteine and glycine-rich protein 1	3.62122	1.05415	33	2	No	3.50641e-15	14.4551
Q8WUM4	PDC6I_HUMAN	Programmed cell death 6-interacting protein	3.59435	0.491492	10	1	n/a	4.44393e-08	7.35223
P31949	S10AB_HUMAN	Protein S100-A11	3.58173	0.731717	153	2	Yes	1.63047e-87	86.7877
P14174	MIF_HUMAN	Macrophage migration inhibitory factor	3.55598	0.330962	26	2	Yes	2.54978e-23	22.5935
P04406	G3P_HUMAN	Glyceraldehyde-3-phosphate dehydrogenase	3.5458	0.897861	514	2	Yes	2.58984e-247	246.587
P13489	RINI_HUMAN	Ribonuclease inhibitor	3.52999	0.872131	56	2	Yes	2.4037e-28	27.6191
Q01518	CAP1_HUMAN	Adenylyl cyclase-associated protein 1	3.4957	0.808972	51	2	Yes	4.48705e-27	26.348
O15145	ARPC3_HUMAN	Actin-related protein 2/3 complex subunit 3	3.45313	3.00076	10	2	No	0.0323551	1.49006
P04732	MT1E_HUMAN	Metallothionein-1E	3.41562	0.506166	63	2	Yes	4.31118e-44	43.3654
Q8N339	MT1M_HUMAN	Metallothionein-1M	3.41562	0.506166	63	2	Yes	4.31118e-44	43.3654
Q99497	PARK7_HUMAN	Protein deglycase DJ-1	3.38324	0.762649	119	2	Yes	1.32723e-62	61.8771
P13640	MT1G_HUMAN	Metallothionein-1G	3.33562	0.57731	104	2	Yes	1.8908e-65	64.7234
P80297	MT1X_HUMAN	Metallothionein-1X	3.33562	0.57731	104	2	Yes	1.8908e-65	64.7234
P07205	PGK2_HUMAN	Phosphoglycerate kinase 2	3.33037	1.12539	36	2	Yes	3.41865e-14	13.4661
O75396	SC22B_HUMAN	Vesicle-trafficking protein SEC22b	3.32835	1.05834	4	1	n/a	0.0217632	1.66228
P37802	TAGL2_HUMAN	Transgelin-2	3.30731	0.729047	207	2	Yes	3.66914e-109	108.435
P67936	TPM4_HUMAN	Tropomyosin alpha-4 chain	3.26785	1.14878	35	2	Yes	2.8962e-13	12.5382
P17655	CAN2_HUMAN	Calpain-2 catalytic subunit	3.23604	1.14718	20	1	n/a	4.57871e-08	7.33926
P07741	APT_HUMAN	Adenine phosphoribosyltransferase	3.2314	0.195084	11	2	Yes	3.05017e-11	10.5157
O00299	CLIC1_HUMAN	Chloride intracellular channel protein 1	3.21989	0.65194	49	2	Yes	6.82005e-28	27.1662
P31150	GDIA_HUMAN	Rab GDP dissociation inhibitor alpha	3.21622	0.543145	53	2	Yes	7.30964e-34	33.1361
P07737	PROF1_HUMAN	Profilin-1	3.20899	0.69536	163	2	Yes	2.00643e-86	85.6976
Q9UL46	PSME2_HUMAN	Proteasome activator complex subunit 2	3.20272	0.478682	19	1	n/a	9.16186e-14	13.038
Q9H4A4	AMPB_HUMAN	Aminopeptidase B	3.16593	1.45806	20	2	Yes	3.10176e-06	5.50839
P80723	BASP1_HUMAN	Brain acid soluble protein 1	3.15719	0.644744	58	2	Yes	1.73171e-32	31.7615
P06744	G6PI_HUMAN	Glucose-6-phosphate isomerase	3.15013	0.324843	81	2	Yes	2.02892e-67	66.6927
P31939	PUR9_HUMAN	Bifunctional purine biosynthesis protein PURH	3.14682	0.681502	63	2	No	9.30031e-34	33.0315
P10599	THIO_HUMAN	Thioredoxin	3.13396	0.802009	43	2	Yes	1.39573e-20	19.8552
Q9H299	SH3L3_HUMAN	SH3 domain-binding glutamic acid-rich-like protein 3	3.11811	0.283143	6	1	n/a	8.90127e-06	5.05055
P78417	GSTO1_HUMAN	Glutathione S-transferase omega-1	3.09743	1.00973	3	1	n/a	0.0693167	1.15916
O75083	WDR1_HUMAN	WD repeat-containing protein 1	3.07432	1.06562	34	2	Yes	9.36298e-13	12.0286
O00560	SDCB1_HUMAN	Syntenin-1	3.0686	0.53809	4	1	n/a	0.00457175	2.33992
P02795	MT2_HUMAN	Metallothionein-2	3.0676	0.849538	130	2	Yes	5.38271e-56	55.269
P50395	GDIB_HUMAN	Rab GDP dissociation inhibitor beta	3.06667	0.905576	96	2	Yes	2.08995e-39	38.6799
P07195	LDHB_HUMAN	L-lactate dehydrogenase B chain	3.04704	0.514319	105	2	Yes	2.20883e-65	64.6558
P21589	5NTD_HUMAN	5'-nucleotidase	3.03426	0.659913	24	2	Yes	4.28765e-13	12.3678
P55209	NP1L1_HUMAN	Nucleosome assembly protein 1-like 1	3.03171	0.244078	17	1	n/a	2.05522e-16	15.6871
P50502	F10A1_HUMAN	Hsc70-interacting protein	3.02905	0.543649	3	1	n/a	0.0231032	1.63633
Q8IZP2	ST134_HUMAN	Putative protein FAM10A4	3.02905	0.543649	3	1	n/a	0.0231032	1.63633
P04731	MT1A_HUMAN	Metallothionein-1A	3.00106	0.588535	33	2	Yes	5.56907e-19	18.2542
P80294	MT1H_HUMAN	Metallothionein-1H	3.00106	0.588535	33	2	Yes	5.56907e-19	18.2542
A6NMY6	AXA2L_HUMAN	Putative annexin A2-like protein	2.99553	0.63793	318	2	Yes	1.23831e-165	164.907
Q9BWD1	THIC_HUMAN	Acetyl-CoA acetyltransferase, cytosolic	2.9933	1.23479	33	2	Yes	1.88136e-10	9.72553
Q15019	SEPT2_HUMAN	Septin-2	2.98463	1.99789	23	2	Yes	0.000104835	3.9795
P61970	NTF2_HUMAN	Nuclear transport factor 2	2.927	0.801035	6	1	n/a	0.00200128	2.69869
O43852	CALU_HUMAN	Calumenin	2.92656	0.873845	122	2	Yes	2.92569e-48	47.5338
P07355	ANXA2_HUMAN	Annexin A2	2.91099	0.618519	555	2	Yes	1.89493e-285	284.722
P60903	S10AA_HUMAN	Protein S100-A10	2.90603	0.54567	50	2	Yes	6.1144e-29	28.2136
P04075	ALDOA_HUMAN	Fructose-bisphosphate aldolase A	2.88518	0.822872	176	2	Yes	1.66811e-71	70.7778
P22392	NDKB_HUMAN	Nucleoside diphosphate kinase B	2.8606	0.418476	93	2	Yes	3.80834e-62	61.4193
Q9UKK9	NUDT5_HUMAN	ADP-sugar pyrophosphatase	2.85318	1.21125	3	1	n/a	0.11777	0.928965
Q9BYZ2	LDH6B_HUMAN	L-lactate dehydrogenase A-like 6B	2.85051	0.983354	8	1	n/a	0.00109614	2.96013
P53396	ACLY_HUMAN	ATP-citrate synthase	2.83851	0.559534	99	2	Yes	3.56723e-54	53.4477
P07864	LDHC_HUMAN	L-lactate dehydrogenase C chain	2.81006	0.123522	6	2	Yes	3.59599e-06	5.44418
Q6ZMR3	LDH6A_HUMAN	L-lactate dehydrogenase A-like 6A	2.81006	0.123522	6	2	Yes	3.59599e-06	5.44418
P09972	ALDOC_HUMAN	Fructose-bisphosphate aldolase C	2.784	0.462179	26	2	Yes	2.57568e-16	15.5891
Q13740	CD166_HUMAN	CD166 antigen	2.77646	0.746843	28	2	No	1.44514e-12	11.8401
P15311	EZRI_HUMAN	Ezrin	2.74447	1.16924	27	2	No	4.14733e-08	7.38223
Q14019	COTL1_HUMAN	Coactosin-like protein	2.73228	0.18468	12	2	Yes	1.79663e-11	10.7455
A2BFH1	PAL4G_HUMAN	Peptidyl-prolyl cis-trans isomerase A-like 4C; Peptidyl-prolyl cis-trans isomerase A-like 4G	2.73064	0.45345	30	2	Yes	1.26762e-18	17.897
F5H284	PAL4D_HUMAN	Peptidyl-prolyl cis-trans isomerase A-like 4D	2.73064	0.45345	30	2	Yes	1.26762e-18	17.897
P21333	FLNA_HUMAN	Filamin-A	2.7219	0.891806	563	2	Yes	9.76546e-192	191.01
Q9Y536	PAL4A_HUMAN	Peptidyl-prolyl cis-trans isomerase A-like 4A	2.71957	0.36442	43	2	Yes	4.76099e-30	29.3223
Q13451	FKBP5_HUMAN	Peptidyl-prolyl cis-trans isomerase FKBP5	2.70859	0.526481	46	2	Yes	2.21412e-25	24.6548
P10768	ESTD_HUMAN	S-formylglutathione hydrolase	2.70472	0.714938	32	2	Yes	2.84746e-14	13.5455
Q9NR31	SAR1A_HUMAN	GTP-binding protein SAR1a	2.69781	0.777807	7	2	No	0.00218869	2.65982
O60361	NDK8_HUMAN	Putative nucleoside diphosphate kinase	2.68819	0.288397	50	2	Yes	3.27097e-39	38.4853
Q5T1J5	CHCH9_HUMAN	Putative coiled-coil-helix-coiled-coil-helix domain-containing protein CHCHD2P9, mitochondrial	2.67264	0.339039	3	1	n/a	0.0134202	1.87224
Q9Y6H1	CHCH2_HUMAN	Coiled-coil-helix-coiled-coil-helix domain-containing protein 2	2.67264	0.339039	3	1	n/a	0.0134202	1.87224
P68104	EF1A1_HUMAN	Elongation factor 1-alpha 1	2.65392	0.702292	416	2	Yes	2.25188e-171	170.647
P62937	PPIA_HUMAN	Peptidyl-prolyl cis-trans isomerase A	2.65179	0.612834	279	2	Yes	1.95344e-129	128.709
Q5VTE0	EF1A3_HUMAN	Putative elongation factor 1-alpha-like 3	2.64311	0.701152	398	2	Yes	2.66041e-163	162.575
Q9UI15	TAGL3_HUMAN	Transgelin-3	2.61788	0.783888	12	2	No	3.1063e-05	4.50776
Q15181	IPYR_HUMAN	Inorganic pyrophosphatase	2.61737	0.433981	37	2	Yes	1.66106e-22	21.7796
Q9Y281	COF2_HUMAN	Cofilin-2	2.6119	0.714881	105	2	Yes	1.53465e-42	41.814
P34932	HSP74_HUMAN	Heat shock 70 kDa protein 4	2.59319	0.632897	89	2	Yes	8.71865e-40	39.0596
Q99733	NP1L4_HUMAN	Nucleosome assembly protein 1-like 4	2.59138	0.29841	5	1	n/a	0.00028332	3.54772
P18206	VINC_HUMAN	Vinculin	2.591	0.860313	20	2	Yes	1.52153e-07	6.81772
Q09666	AHNK_HUMAN	Neuroblast differentiation-associated protein AHNAK	2.58416	0.644193	743	2	Yes	0	#NUM!
P61077	UB2D3_HUMAN	Ubiquitin-conjugating enzyme E2 D3	2.5834	0.734664	4	1	n/a	0.0229897	1.63847
P62837	UB2D2_HUMAN	Ubiquitin-conjugating enzyme E2 D2	2.5834	0.734664	4	1	n/a	0.0229897	1.63847
P18085	ARF4_HUMAN	ADP-ribosylation factor 4	2.57955	1.30189	12	2	Yes	0.00182028	2.73986
Q9Y6B6	SAR1B_HUMAN	GTP-binding protein SAR1b	2.55868	0.0230555	4	1	n/a	8.91967e-07	6.04965
Q05639	EF1A2_HUMAN	Elongation factor 1-alpha 2	2.55497	0.623976	184	2	Yes	2.27618e-80	79.6428
P27348	1433T_HUMAN	14-3-3 protein theta	2.54154	0.826707	119	2	Yes	3.17673e-40	39.498
P49588	SYAC_HUMAN	Alanine--tRNA ligase, cytoplasmic	2.54009	0.588639	10	1	n/a	1.69022e-05	4.77206
P31946	1433B_HUMAN	14-3-3 protein beta/alpha	2.53675	0.684925	162	2	Yes	1.06738e-64	63.9717
P23528	COF1_HUMAN	Cofilin-1	2.48602	0.725476	179	2	Yes	1.37773e-65	64.8608
Q92688	AN32B_HUMAN	Acidic leucine-rich nuclear phosphoprotein 32 family member B	2.44973	0.529724	23	2	Yes	1.37097e-11	10.863
P05455	LA_HUMAN	Lupus La protein	2.43568	0.40198	27	2	Yes	3.91878e-16	15.4068
P46940	IQGA1_HUMAN	Ras GTPase-activating-like protein IQGAP1	2.42905	0.599205	109	2	Yes	2.51748e-46	45.599
P04083	ANXA1_HUMAN	Annexin A1	2.42712	0.500992	147	2	Yes	7.58771e-72	71.1199
Q08043	ACTN3_HUMAN	Alpha-actinin-3	2.41178	0.370074	94	2	Yes	5.09231e-57	56.2931
P35609	ACTN2_HUMAN	Alpha-actinin-2	2.40784	0.386382	113	2	Yes	2.58315e-66	65.5878
P62191	PRS4_HUMAN	26S protease regulatory subunit 4	2.39879	0.00972269	3	1	n/a	1.61042e-05	4.79306
P15170	ERF3A_HUMAN	Eukaryotic peptide chain release factor GTP-binding subunit ERF3A	2.38581	0.0101875	4	1	n/a	1.09509e-07	6.96055
P15531	NDKA_HUMAN	Nucleoside diphosphate kinase A	2.38018	0.637725	55	2	Yes	5.32391e-22	21.2738
P63104	1433Z_HUMAN	14-3-3 protein zeta/delta	2.37672	0.552216	298	2	Yes	2.00253e-129	128.698
P60981	DEST_HUMAN	Destrin	2.36627	0.560483	55	2	Yes	2.53254e-24	23.5964
Q99536	VAT1_HUMAN	Synaptic vesicle membrane protein VAT-1 homolog	2.3602	2.00814	4	1	n/a	0.268509	0.57104
P55735	SEC13_HUMAN	Protein SEC13 homolog	2.35956	0.512677	12	1	n/a	1.71451e-06	5.76586
P53675	CLH2_HUMAN	Clathrin heavy chain 2	2.35202	0.647049	55	2	Yes	2.4852e-21	20.6046
O43707	ACTN4_HUMAN	Alpha-actinin-4	2.34153	0.433262	402	2	Yes	1.87073e-207	206.728
P15144	AMPN_HUMAN	Aminopeptidase N	2.34018	0.410658	372	2	Yes	9.27981e-200	199.032
P12814	ACTN1_HUMAN	Alpha-actinin-1	2.33244	0.392801	353	2	Yes	5.0142e-195	194.3
P07196	NFL_HUMAN	Neurofilament light polypeptide	2.32659	0.273046	41	2	Yes	3.80346e-29	28.4198
P09211	GSTP1_HUMAN	Glutathione S-transferase P	2.31857	0.507812	185	2	Yes	1.23634e-83	82.9079
Q9UBQ7	GRHPR_HUMAN	Glyoxylate reductase/hydroxypyruvate reductase	2.31841	0.384034	22	1	n/a	2.71934e-13	12.5655
P07197	NFM_HUMAN	Neurofilament medium polypeptide	2.31629	0.287626	66	2	Yes	4.74926e-45	44.3234
Q16352	AINX_HUMAN	Alpha-internexin	2.31629	0.287626	66	2	Yes	4.74926e-45	44.3234
Q9NZN4	EHD2_HUMAN	EH domain-containing protein 2	2.28985	0.343902	61	2	Yes	7.54291e-37	36.1225
P00441	SODC_HUMAN	Superoxide dismutase [Cu-Zn]	2.27234	1.84703	9	2	No	0.0776086	1.11009
O15460	P4HA2_HUMAN	Prolyl 4-hydroxylase subunit alpha-2	2.25128	0.424419	7	1	n/a	0.000234046	3.6307
P27695	APEX1_HUMAN	DNA-(apurinic or apyrimidinic site) lyase	2.24754	1.12837	28	2	Yes	3.62484e-06	5.44071
P17661	DESM_HUMAN	Desmin	2.23949	0.332238	93	2	Yes	1.34981e-55	54.8697
P54727	RD23B_HUMAN	UV excision repair protein RAD23 homolog B	2.2359	0.694169	32	2	Yes	3.87525e-11	10.4117
P41219	PERI_HUMAN	Peripherin	2.23407	0.323832	68	2	Yes	2.00293e-41	40.6983
P62258	1433E_HUMAN	14-3-3 protein epsilon	2.20345	0.473463	131	2	Yes	1.6139e-58	57.7921
P51858	HDGF_HUMAN	Hepatoma-derived growth factor	2.20024	0.766717	32	1	n/a	5.37323e-10	9.26976
P08670	VIME_HUMAN	Vimentin	2.19341	0.416499	984	2	Yes	0	#NUM!
P13639	EF2_HUMAN	Elongation factor 2	2.18525	0.529954	310	2	Yes	3.00355e-122	121.522
Q9BT78	CSN4_HUMAN	COP9 signalosome complex subunit 4	2.18046	0.212061	6	1	n/a	3.80424e-05	4.41973
P39687	AN32A_HUMAN	Acidic leucine-rich nuclear phosphoprotein 32 family member A	2.15956	0.6753	21	2	Yes	2.14074e-07	6.66944
P61981	1433G_HUMAN	14-3-3 protein gamma	2.15715	0.46687	126	2	Yes	3.75201e-55	54.4257
Q16181	SEPT7_HUMAN	Septin-7	2.15658	0.654595	37	2	Yes	1.24367e-12	11.9053
P61160	ARP2_HUMAN	Actin-related protein 2	2.1556	1.07596	10	2	No	0.00941147	2.02634
P07858	CATB_HUMAN	Cathepsin B	2.12541	0.349979	73	2	Yes	1.45673e-39	38.8366
P12081	SYHC_HUMAN	Histidine--tRNA ligase, cytoplasmic	2.10862	0.244986	14	2	Yes	9.65422e-10	9.01528
P63208	SKP1_HUMAN	S-phase kinase-associated protein 1	2.10823	0.295087	19	2	Yes	7.67522e-12	11.1149
P22234	PUR6_HUMAN	Multifunctional protein ADE2	2.10691	0.514956	21	1	n/a	4.0742e-09	8.38996
P09382	LEG1_HUMAN	Galectin-1	2.1047	0.451378	302	2	Yes	4.52386e-129	128.344
O43399	TPD54_HUMAN	Tumor protein D54	2.09763	0.133968	6	1	n/a	5.67748e-06	5.24584
P24534	EF1B_HUMAN	Elongation factor 1-beta	2.09476	0.200656	34	2	Yes	8.61151e-26	25.0649
P36952	SPB5_HUMAN	Serpin B5	2.08819	0.612659	63	2	Yes	7.44683e-21	20.128
Q9P1U1	ARP3B_HUMAN	Actin-related protein 3B	2.088	0.292332	10	2	Yes	2.48531e-06	5.60462
P28066	PSA5_HUMAN	Proteasome subunit alpha type-5	2.07693	1.66106	28	2	No	0.00202184	2.69425
P14324	FPPS_HUMAN	Farnesyl pyrophosphate synthase	2.06951	0.292474	49	2	Yes	3.02046e-29	28.5199
Q15149	PLEC_HUMAN	Plectin	2.06832	0.372519	1985	2	Yes	0	#NUM!
O14579	COPE_HUMAN	Coatomer subunit epsilon	2.06375	0.650234	19	2	Yes	1.68361e-06	5.77376
P07602	SAP_HUMAN	Prosaposin	2.06175	0.470505	133	2	Yes	1.30652e-53	52.8839
Q9C0K3	ARP3C_HUMAN	Actin-related protein 3C	2.02518	0.249443	13	2	Yes	1.29553e-08	7.88755
Q99460	PSMD1_HUMAN	26S proteasome non-ATPase regulatory subunit 1	2.01861	0.748885	14	1	n/a	0.000207603	3.68277
P29692	EF1D_HUMAN	Elongation factor 1-delta	1.99584	0.296929	86	2	Yes	7.29029e-48	47.1373
Q00610	CLH1_HUMAN	Clathrin heavy chain 1	1.98321	0.405857	284	2	Yes	2.191e-120	119.659
P83881	RL36A_HUMAN	60S ribosomal protein L36a	1.97706	0.0727029	11	2	Yes	7.19879e-12	11.1427
Q969Q0	RL36L_HUMAN	60S ribosomal protein L36a-like	1.97706	0.0727029	11	2	Yes	7.19879e-12	11.1427
Q04917	1433F_HUMAN	14-3-3 protein eta	1.9689	0.306837	78	2	Yes	1.14836e-41	40.9399
P26641	EF1G_HUMAN	Elongation factor 1-gamma	1.9604	0.211214	46	2	Yes	1.95098e-31	30.7097
O00487	PSDE_HUMAN	26S proteasome non-ATPase regulatory subunit 14	1.93617	0.723784	3	1	n/a	0.154389	0.811384
P60900	PSA6_HUMAN	Proteasome subunit alpha type-6	1.93358	0.0526608	5	1	n/a	2.41944e-06	5.61628
O14818	PSA7_HUMAN	Proteasome subunit alpha type-7	1.93146	0.628495	16	2	Yes	3.68394e-05	4.43369
Q9P2E9	RRBP1_HUMAN	Ribosome-binding protein 1	1.93023	0.338156	78	2	Yes	1.43953e-37	36.8418
P49257	LMAN1_HUMAN	Protein ERGIC-53	1.92053	0.511465	7	1	n/a	0.00312064	2.50576
P09429	HMGB1_HUMAN	High mobility group protein B1	1.91723	0.349304	57	2	Yes	1.01447e-26	25.9938
P49327	FAS_HUMAN	Fatty acid synthase	1.91714	0.313305	502	2	Yes	9.30363e-248	247.031
Q01105	SET_HUMAN	Protein SET	1.91539	0.306658	69	2	Yes	1.79677e-35	34.7455
P30153	2AAA_HUMAN	Serine/threonine-protein phosphatase 2A 65 kDa regulatory subunit A alpha isoform	1.90805	0.524834	13	2	No	6.3645e-05	4.19624
P61204	ARF3_HUMAN	ADP-ribosylation factor 3	1.9013	0.430748	28	2	Yes	2.44174e-11	10.6123
P47914	RL29_HUMAN	60S ribosomal protein L29	1.89904	0.124189	27	2	Yes	1.57365e-23	22.8031
Q8TAA3	PSA7L_HUMAN	Proteasome subunit alpha type-7-like	1.89123	0.247216	6	1	n/a	0.000309355	3.50954
P42677	RS27_HUMAN	40S ribosomal protein S27	1.88217	0.535018	3	1	n/a	0.103855	0.983572
Q71UM5	RS27L_HUMAN	40S ribosomal protein S27-like	1.88217	0.535018	3	1	n/a	0.103855	0.983572
O15260	SURF4_HUMAN	Surfeit locus protein 4	1.87052	0.460329	3	1	n/a	0.0819178	1.08662
P11498	PYC_HUMAN	Pyruvate carboxylase, mitochondrial	1.86798	0.618625	57	2	Yes	6.80617e-15	14.1671
O95757	HS74L_HUMAN	Heat shock 70 kDa protein 4L	1.86475	0.496184	22	2	Yes	8.33863e-08	7.07891
B2RPK0	HGB1A_HUMAN	Putative high mobility group protein B1-like 1	1.85343	0.324661	21	2	Yes	2.4283e-10	9.6147
P25786	PSA1_HUMAN	Proteasome subunit alpha type-1	1.84909	0.26258	12	2	Yes	5.56628e-07	6.25444
P07203	GPX1_HUMAN	Glutathione peroxidase 1	1.84732	0.242032	8	1	n/a	2.28287e-05	4.64152
P07237	PDIA1_HUMAN	Protein disulfide-isomerase	1.84573	0.274981	411	2	Yes	5.45979e-211	210.263
P05388	RLA0_HUMAN	60S acidic ribosomal protein P0	1.84192	0.41694	157	2	Yes	6.57172e-57	56.1823
Q9NVP1	DDX18_HUMAN	ATP-dependent RNA helicase DDX18	1.84066	0.338886	3	1	n/a	0.0501296	1.29991
P11586	C1TC_HUMAN	C-1-tetrahydrofolate synthase, cytoplasmic	1.83859	1.66658	7	1	n/a	0.231443	0.635555
Q15293	RCN1_HUMAN	Reticulocalbin-1	1.83538	0.550515	36	2	Yes	1.21724e-10	9.91462
P26583	HMGB2_HUMAN	High mobility group protein B2	1.83485	0.362616	24	2	Yes	1.29457e-10	9.88787
P28799	GRN_HUMAN	Granulins	1.83167	0.113945	6	1	n/a	1.0051e-05	4.99779
P55072	TERA_HUMAN	Transitional endoplasmic reticulum ATPase	1.82958	0.361953	201	2	Yes	1.63738e-81	80.7859
Q12797	ASPH_HUMAN	Aspartyl/asparaginyl beta-hydroxylase	1.82489	0.129602	48	2	Yes	2.75625e-39	38.5597
P25789	PSA4_HUMAN	Proteasome subunit alpha type-4	1.82097	0.411415	20	2	Yes	4.99594e-08	7.30138
P12036	NFH_HUMAN	Neurofilament heavy polypeptide	1.81843	1.00944	55	2	Yes	1.72728e-07	6.76264
P83731	RL24_HUMAN	60S ribosomal protein L24	1.80979	0.228002	43	2	Yes	2.93334e-25	24.5326
P20618	PSB1_HUMAN	Proteasome subunit beta type-1	1.79853	0.191136	24	2	Yes	8.22058e-16	15.0851
P62333	PRS10_HUMAN	26S protease regulatory subunit 10B	1.7965	0.282257	12	2	Yes	1.95683e-06	5.70845
Q00341	VIGLN_HUMAN	Vigilin	1.7963	0.0216017	6	1	n/a	3.15797e-09	8.50059
Q9NRP0	OSTC_HUMAN	Oligosaccharyltransferase complex subunit OSTC	1.79513	0.29026	3	1	n/a	0.0416639	1.38024
Q8NHW5	RLA0L_HUMAN	60S acidic ribosomal protein P0-like	1.79348	0.306515	101	2	Yes	4.70226e-46	45.3277
P47756	CAPZB_HUMAN	F-actin-capping protein subunit beta	1.78525	0.307998	37	2	Yes	2.97544e-17	16.5264
P61158	ARP3_HUMAN	Actin-related protein 3	1.78405	0.236763	45	2	Yes	3.42009e-25	24.466
P46779	RL28_HUMAN	60S ribosomal protein L28	1.77698	0.273147	54	2	Yes	5.76638e-27	26.2391
Q9Y3I0	RTCB_HUMAN	tRNA-splicing ligase RtcB homolog	1.7738	0.377933	3	1	n/a	0.0711353	1.14791
P62714	PP2AB_HUMAN	Serine/threonine-protein phosphatase 2A catalytic subunit beta isoform	1.76292	0.236627	8	1	n/a	3.91542e-05	4.40722
Q13200	PSMD2_HUMAN	26S proteasome non-ATPase regulatory subunit 2	1.76058	0.26093	19	2	Yes	4.17746e-10	9.37909
Q5SSJ5	HP1B3_HUMAN	Heterochromatin protein 1-binding protein 3	1.75999	0.333046	24	2	Yes	1.53065e-10	9.81513
P46776	RL27A_HUMAN	60S ribosomal protein L27a	1.75831	0.414266	24	2	Yes	8.4345e-09	8.07394
Q9H8Y8	GORS2_HUMAN	Golgi reassembly-stacking protein 2	1.7566	0.677691	5	1	n/a	0.0670207	1.17379
P05387	RLA2_HUMAN	60S acidic ribosomal protein P2	1.75197	0.535833	200	2	Yes	5.73316e-49	48.2416
P49207	RL34_HUMAN	60S ribosomal protein L34	1.74735	0.232248	10	2	Yes	7.45101e-06	5.12778
P41250	SYG_HUMAN	Glycine--tRNA ligase	1.7473	0.544062	47	2	Yes	3.30183e-12	11.4812
Q58FF6	H90B4_HUMAN	Putative heat shock protein HSP 90-beta 4	1.74317	0.387882	7	2	No	0.00386978	2.41231
Q92820	GGH_HUMAN	Gamma-glutamyl hydrolase	1.7425	0.576089	5	1	n/a	0.0449237	1.34752
P62899	RL31_HUMAN	60S ribosomal protein L31	1.73698	0.123993	36	2	Yes	1.59814e-28	27.7964
Q16186	ADRM1_HUMAN	Proteasomal ubiquitin receptor ADRM1	1.7319	0.467309	12	1	n/a	0.000208438	3.68102
P07900	HS90A_HUMAN	Heat shock protein HSP 90-alpha	1.72836	0.316554	335	2	Yes	1.95114e-135	134.71
Q58FG1	HS904_HUMAN	Putative heat shock protein HSP 90-alpha A4	1.72793	0.110959	19	2	Yes	8.12933e-16	15.0899
P21964	COMT_HUMAN	Catechol O-methyltransferase	1.72571	0.114178	10	2	Yes	3.91842e-08	7.40689
Q9NVA2	SEP11_HUMAN	Septin-11	1.72526	0.739359	4	1	n/a	0.144589	0.839866
P31948	STIP1_HUMAN	Stress-induced-phosphoprotein 1	1.72301	0.431502	42	2	Yes	1.70195e-13	12.7691
Q14568	HS902_HUMAN	Heat shock protein HSP 90-alpha A2	1.72128	0.339104	43	2	Yes	3.69062e-17	16.4329
P07951	TPM2_HUMAN	Tropomyosin beta chain	1.72089	0.0556729	2	1	n/a	0.0347305	1.45929
O43242	PSMD3_HUMAN	26S proteasome non-ATPase regulatory subunit 3	1.71405	0.283616	3	1	n/a	0.0487718	1.31183
P17980	PRS6A_HUMAN	26S protease regulatory subunit 6A	1.71334	0.302442	43	2	Yes	1.03312e-18	17.9858
Q58FG0	HS905_HUMAN	Putative heat shock protein HSP 90-alpha A5	1.71055	0.23799	54	2	Yes	5.98319e-28	27.2231
P43686	PRS6B_HUMAN	26S protease regulatory subunit 6B	1.70927	0.188789	15	2	Yes	2.00786e-09	8.69727
P27635	RL10_HUMAN	60S ribosomal protein L10	1.70692	0.242951	51	2	Yes	6.00866e-26	25.2212
P62917	RL8_HUMAN	60S ribosomal protein L8	1.69706	0.433843	63	2	Yes	7.34084e-19	18.1343
Q58FF8	H90B2_HUMAN	Putative heat shock protein HSP 90-beta 2	1.69682	0.255399	107	2	Yes	7.82839e-51	50.1063
P84077	ARF1_HUMAN	ADP-ribosylation factor 1	1.69362	0.600334	36	2	Yes	5.44709e-08	7.26384
P61254	RL26_HUMAN	60S ribosomal protein L26	1.69307	0.124459	5	1	n/a	0.000239198	3.62124
Q9UNX3	RL26L_HUMAN	60S ribosomal protein L26-like 1	1.69307	0.124459	5	1	n/a	0.000239198	3.62124
P25787	PSA2_HUMAN	Proteasome subunit alpha type-2	1.6892	0.300153	21	2	Yes	2.30344e-09	8.63762
Q6NVV1	R13P3_HUMAN	Putative 60S ribosomal protein L13a protein RPL13AP3	1.68533	0.178172	3	1	n/a	0.0217959	1.66162
Q9Y3B8	ORN_HUMAN	Oligoribonuclease, mitochondrial	1.6776	0.0792125	4	1	n/a	0.000435036	3.36147
P58107	EPIPL_HUMAN	Epiplakin	1.67746	0.12171	9	1	n/a	1.67328e-07	6.77643
Q58FF7	H90B3_HUMAN	Putative heat shock protein HSP 90-beta-3	1.67501	0.192604	64	2	Yes	6.34342e-37	36.1977
P67775	PP2AA_HUMAN	Serine/threonine-protein phosphatase 2A catalytic subunit alpha isoform	1.66791	0.206728	12	2	Yes	5.61108e-07	6.25095
O75348	VATG1_HUMAN	V-type proton ATPase subunit G 1	1.66722	0.63516	8	1	n/a	0.0207727	1.68251
P28072	PSB6_HUMAN	Proteasome subunit beta type-6	1.6659	0.0765566	4	1	n/a	0.000413962	3.38304
P08238	HS90B_HUMAN	Heat shock protein HSP 90-beta	1.66412	0.269945	312	2	Yes	6.66243e-134	133.176
P08708	RS17_HUMAN	40S ribosomal protein S17	1.65367	0.350662	35	2	Yes	1.32091e-12	11.8791
P0CW22	RS17_HUMAN	40S ribosomal protein S17	1.65367	0.350662	35	2	Yes	1.32091e-12	11.8791
P62195	PRS8_HUMAN	26S protease regulatory subunit 8	1.65306	0.00773043	4	1	n/a	4.57178e-07	6.33992
P26639	SYTC_HUMAN	Threonine--tRNA ligase, cytoplasmic	1.65117	0.105179	3	1	n/a	0.00858468	2.06628
A6NKH3	RL37L_HUMAN	Putative 60S ribosomal protein L37a-like protein	1.64539	0.122919	18	2	Yes	1.80506e-13	12.7435
P49821	NDUV1_HUMAN	NADH dehydrogenase [ubiquinone] flavoprotein 1, mitochondrial	1.64393	1.60218	32	2	No	0.0303158	1.51833
P61201	CSN2_HUMAN	COP9 signalosome complex subunit 2	1.64253	0.0841059	5	1	n/a	6.88781e-05	4.16192
P35998	PRS7_HUMAN	26S protease regulatory subunit 7	1.63233	0.240439	11	2	Yes	1.10243e-05	4.95765
P61513	RL37A_HUMAN	60S ribosomal protein L37a	1.62914	0.224604	53	2	Yes	3.5403e-26	25.451
P62266	RS23_HUMAN	40S ribosomal protein S23	1.6283	0.124709	14	1	n/a	8.00221e-11	10.0968
Q07065	CKAP4_HUMAN	Cytoskeleton-associated protein 4	1.6258	0.262592	126	2	Yes	2.44246e-53	52.6122
P60033	CD81_HUMAN	CD81 antigen	1.62204	0.701169	5	1	n/a	0.118297	0.927026
Q96L21	RL10L_HUMAN	60S ribosomal protein L10-like	1.61854	0.0561867	9	2	Yes	6.04117e-09	8.21888
P62829	RL23_HUMAN	60S ribosomal protein L23	1.61075	0.376885	68	2	Yes	1.92197e-20	19.7163
Q15185	TEBP_HUMAN	Prostaglandin E synthase 3	1.61071	0.363372	35	2	Yes	1.86774e-11	10.7287
Q12907	LMAN2_HUMAN	Vesicular integral-membrane protein VIP36	1.60465	0.480998	9	1	n/a	0.00545604	2.26312
P10620	MGST1_HUMAN	Microsomal glutathione S-transferase 1	1.6032	0.123334	22	2	Yes	7.75894e-16	15.1102
P05386	RLA1_HUMAN	60S acidic ribosomal protein P1	1.5927	0.586408	85	2	Yes	1.50569e-14	13.8223
P62913	RL11_HUMAN	60S ribosomal protein L11	1.59132	0.236431	77	2	Yes	2.23428e-34	33.6509
P26373	RL13_HUMAN	60S ribosomal protein L13	1.58965	0.274485	36	2	Yes	1.21295e-14	13.9162
Q92598	HS105_HUMAN	Heat shock protein 105 kDa	1.5778	0.591532	35	2	Yes	1.85143e-06	5.73249
P23526	SAHH_HUMAN	Adenosylhomocysteinase	1.57773	1.21238	3	1	n/a	0.49594	0.304571
P62244	RS15A_HUMAN	40S ribosomal protein S15a	1.57593	1.51827	27	2	No	0.0598826	1.2227
P52907	CAZA1_HUMAN	F-actin-capping protein subunit alpha-1	1.57053	0.382639	45	2	Yes	8.57286e-13	12.0669
Q969H8	MYDGF_HUMAN	Myeloid-derived growth factor	1.56636	0.295962	10	2	Yes	0.000305422	3.5151
P17931	LEG3_HUMAN	Galectin-3	1.56301	0.279768	16	2	Yes	1.27425e-06	5.89474
Q14974	IMB1_HUMAN	Importin subunit beta-1	1.56143	0.631234	81	2	Yes	8.53387e-12	11.0689
P23588	IF4B_HUMAN	Eukaryotic translation initiation factor 4B	1.56045	0.224473	3	1	n/a	0.0495338	1.3051
Q02878	RL6_HUMAN	60S ribosomal protein L6	1.55915	0.312738	83	2	Yes	2.79936e-27	26.5529
Q2VIR3	IF2GL_HUMAN	Putative eukaryotic translation initiation factor 2 subunit 3-like protein	1.55659	0.871042	13	2	No	0.0417427	1.37942
P18124	RL7_HUMAN	60S ribosomal protein L7	1.55179	0.223785	135	2	Yes	9.42883e-59	58.0255
O75608	LYPA1_HUMAN	Acyl-protein thioesterase 1	1.54631	0.569876	5	1	n/a	0.0986892	1.00573
P42766	RL35_HUMAN	60S ribosomal protein L35	1.54575	0.341938	32	2	Yes	4.67421e-10	9.33029
P62888	RL30_HUMAN	60S ribosomal protein L30	1.54504	0.251361	74	2	Yes	2.76102e-29	28.5589
P35268	RL22_HUMAN	60S ribosomal protein L22	1.53105	0.163213	43	2	Yes	8.14997e-24	23.0888
Q9P2J5	SYLC_HUMAN	Leucine--tRNA ligase, cytoplasmic	1.53014	0.199163	31	2	Yes	4.58033e-15	14.3391
P0CG47	UBB_HUMAN	Polyubiquitin-B	1.52711	0.72802	12	2	No	0.0310131	1.50846
P0CG48	UBC_HUMAN	Polyubiquitin-C	1.52711	0.72802	12	2	No	0.0310131	1.50846
Q5JNZ5	RS26L_HUMAN	Putative 40S ribosomal protein S26-like 1	1.52698	0.391898	22	2	No	3.71336e-06	5.43023
P30044	PRDX5_HUMAN	Peroxiredoxin-5, mitochondrial	1.52569	0.224257	47	2	Yes	2.90011e-20	19.5376
P47755	CAZA2_HUMAN	F-actin-capping protein subunit alpha-2	1.52535	0.027886	4	1	n/a	4.11239e-05	4.38591
P84098	RL19_HUMAN	60S ribosomal protein L19	1.52467	0.193403	25	2	Yes	1.84652e-12	11.7336
P32969	RL9_HUMAN	60S ribosomal protein L9	1.52398	0.252087	107	2	Yes	2.96092e-40	39.5286
Q9Y224	CN166_HUMAN	UPF0568 protein C14orf166	1.52302	0.362374	17	2	Yes	2.6583e-05	4.5754
P62910	RL32_HUMAN	60S ribosomal protein L32	1.52279	0.436889	73	2	Yes	1.34451e-15	14.8714
Q6EEV6	SUMO4_HUMAN	Small ubiquitin-related modifier 4	1.52171	0.263083	22	2	Yes	1.05413e-08	7.97711
P62987	RL40_HUMAN	Ubiquitin-60S ribosomal protein L40	1.52166	0.213779	20	2	Yes	2.29082e-09	8.64001
P13797	PLST_HUMAN	Plastin-3	1.51668	0.240595	17	2	Yes	2.41504e-07	6.61707
Q9NYU2	UGGG1_HUMAN	UDP-glucose:glycoprotein glucosyltransferase 1	1.50876	0.674535	13	1	n/a	0.0186275	1.72985
P18621	RL17_HUMAN	60S ribosomal protein L17	1.50807	0.145242	50	2	Yes	5.72738e-29	28.242
Q15056	IF4H_HUMAN	Eukaryotic translation initiation factor 4H	1.50477	0.678862	6	1	n/a	0.128192	0.892138
P62851	RS25_HUMAN	40S ribosomal protein S25	1.50061	0.140464	13	2	Yes	5.73899e-08	7.24116
P62847	RS24_HUMAN	40S ribosomal protein S24	1.499	0.190927	42	2	Yes	7.55432e-20	19.1218
P46783	RS10_HUMAN	40S ribosomal protein S10	1.49784	0.195659	45	2	Yes	9.13466e-21	20.0393
P08134	RHOC_HUMAN	Rho-related GTP-binding protein RhoC	1.49057	0.240821	25	2	Yes	5.40037e-10	9.26758
P38117	ETFB_HUMAN	Electron transfer flavoprotein subunit beta	1.48938	0.160715	43	2	Yes	9.78307e-23	22.0095
P23396	RS3_HUMAN	40S ribosomal protein S3	1.48645	0.2978	51	2	Yes	9.5003e-16	15.0223
P62750	RL23A_HUMAN	60S ribosomal protein L23a	1.48111	0.448048	34	2	Yes	5.10634e-07	6.29189
P62854	RS26_HUMAN	40S ribosomal protein S26	1.47994	0.378509	24	2	No	2.98146e-06	5.52557
P62424	RL7A_HUMAN	60S ribosomal protein L7a	1.47744	0.247561	126	2	Yes	6.0787e-44	43.2162
P15880	RS2_HUMAN	40S ribosomal protein S2	1.47222	0.3877	96	2	Yes	1.56729e-20	19.8049
Q9GZV4	IF5A2_HUMAN	Eukaryotic translation initiation factor 5A-2	1.47051	0.177487	55	2	Yes	5.23508e-26	25.2811
P46777	RL5_HUMAN	60S ribosomal protein L5	1.46643	0.252221	105	2	Yes	2.37824e-35	34.6237
P62906	RL10A_HUMAN	60S ribosomal protein L10a	1.46385	0.349178	63	2	Yes	2.26119e-15	14.6457
P62979	RS27A_HUMAN	Ubiquitin-40S ribosomal protein S27a	1.46279	0.273186	79	2	Yes	1.18588e-24	23.926
Q92499	DDX1_HUMAN	ATP-dependent RNA helicase DDX1	1.46117	0.367225	39	2	Yes	2.20459e-09	8.65667
P00387	NB5R3_HUMAN	NADH-cytochrome b5 reductase 3	1.4611	0.171262	20	1	n/a	2.44737e-10	9.6113
P30050	RL12_HUMAN	60S ribosomal protein L12	1.46093	0.248389	89	2	Yes	2.97937e-30	29.5259
O00429	DNM1L_HUMAN	Dynamin-1-like protein	1.46032	0.12389	10	1	n/a	9.21279e-07	6.03561
P62633	CNBP_HUMAN	Cellular nucleic acid-binding protein	1.45191	0.318924	80	2	Yes	1.2548e-20	19.9014
Q9UMX0	UBQL1_HUMAN	Ubiquilin-1	1.45145	0.328437	3	1	n/a	0.140244	0.853117
P62273	RS29_HUMAN	40S ribosomal protein S29	1.44597	0.106308	25	2	Yes	1.70862e-16	15.7674
Q14240	IF4A2_HUMAN	Eukaryotic initiation factor 4A-II	1.44167	0.486566	86	2	Yes	8.80502e-13	12.0553
P33121	ACSL1_HUMAN	Long-chain-fatty-acid--CoA ligase 1	1.44005	0.363348	126	2	No	2.48015e-26	25.6055
P00390	GSHR_HUMAN	Glutathione reductase, mitochondrial	1.43687	0.0103346	3	1	n/a	0.000186485	3.72936
Q8NC51	PAIRB_HUMAN	Plasminogen activator inhibitor 1 RNA-binding protein	1.43541	0.234773	91	2	Yes	6.89801e-31	30.1613
Q02543	RL18A_HUMAN	60S ribosomal protein L18a	1.43356	0.245764	31	2	Yes	9.89723e-11	10.0045
Q6IS14	IF5AL_HUMAN	Eukaryotic translation initiation factor 5A-1-like	1.43227	0.297343	112	2	Yes	3.46861e-29	28.4598
P61769	B2MG_HUMAN	Beta-2-microglobulin	1.4302	0.040299	4	1	n/a	0.00022482	3.64817
P05198	IF2A_HUMAN	Eukaryotic translation initiation factor 2 subunit 1	1.42978	0.349442	6	1	n/a	0.0296665	1.52773
P49419	AL7A1_HUMAN	Alpha-aminoadipic semialdehyde dehydrogenase	1.42975	0.274233	65	2	Yes	6.31673e-19	18.1995
P39023	RL3_HUMAN	60S ribosomal protein L3	1.42752	0.237009	73	2	Yes	2.39804e-24	23.6201
P55854	SUMO3_HUMAN	Small ubiquitin-related modifier 3	1.42427	0.00667518	6	2	Yes	1.02093e-08	7.99101
P61956	SUMO2_HUMAN	Small ubiquitin-related modifier 2	1.42427	0.00667518	6	2	Yes	1.02093e-08	7.99101
P40429	RL13A_HUMAN	60S ribosomal protein L13a	1.42399	0.14999	6	2	Yes	0.00228338	2.64142
P61313	RL15_HUMAN	60S ribosomal protein L15	1.42289	0.306693	96	2	Yes	9.50431e-24	23.0221
P61586	RHOA_HUMAN	Transforming protein RhoA	1.41981	0.433002	44	2	Yes	9.52022e-08	7.02135
P41252	SYIC_HUMAN	Isoleucine--tRNA ligase, cytoplasmic	1.41954	0.300002	26	2	Yes	2.27055e-07	6.64387
Q9ULC5	ACSL5_HUMAN	Long-chain-fatty-acid--CoA ligase 5	1.41808	0.191234	14	2	No	2.99124e-06	5.52415
Q7KZF4	SND1_HUMAN	Staphylococcal nuclease domain-containing protein 1	1.4168	0.253995	139	2	Yes	5.26014e-41	40.279
P62269	RS18_HUMAN	40S ribosomal protein S18	1.41524	0.219974	46	2	Yes	1.94768e-16	15.7105
P62081	RS7_HUMAN	40S ribosomal protein S7	1.41325	0.36567	95	2	Yes	1.49881e-18	17.8243
P62753	RS6_HUMAN	40S ribosomal protein S6	1.411	0.364315	51	2	Yes	1.56573e-10	9.80528
P39019	RS19_HUMAN	40S ribosomal protein S19	1.40941	0.19723	102	2	Yes	2.20774e-38	37.6561
P62857	RS28_HUMAN	40S ribosomal protein S28	1.40823	0.206957	34	2	Yes	6.64746e-13	12.1773
P40616	ARL1_HUMAN	ADP-ribosylation factor-like protein 1	1.40783	0.196569	16	2	Yes	8.91119e-07	6.05006
P63244	GBLP_HUMAN	Guanine nucleotide-binding protein subunit beta-2-like 1	1.4077	0.234822	151	2	Yes	3.80639e-47	46.4195
Q15365	PCBP1_HUMAN	Poly(rC)-binding protein 1	1.40761	0.136438	98	2	Yes	5.02795e-50	49.2986
P63241	IF5A1_HUMAN	Eukaryotic translation initiation factor 5A-1	1.40418	0.261577	134	2	Yes	4.3448e-37	36.362
Q9UHD8	SEPT9_HUMAN	Septin-9	1.40282	0.835848	5	1	n/a	0.341853	0.466161
P36578	RL4_HUMAN	60S ribosomal protein L4	1.39673	0.336071	173	2	Yes	1.73232e-34	33.7614
P62241	RS8_HUMAN	40S ribosomal protein S8	1.39372	0.26992	145	2	Yes	1.59282e-37	36.7978
P62249	RS16_HUMAN	40S ribosomal protein S16	1.3911	0.198601	17	2	Yes	7.17045e-07	6.14445
P62841	RS15_HUMAN	40S ribosomal protein S15	1.38963	0.240705	84	2	Yes	6.17864e-25	24.2091
P62826	RAN_HUMAN	GTP-binding nuclear protein Ran	1.38916	0.139067	102	2	Yes	1.75545e-49	48.7556
P63220	RS21_HUMAN	40S ribosomal protein S21	1.38903	0.14598	52	2	Yes	9.72213e-25	24.0122
Q9UBI6	GBG12_HUMAN	Guanine nucleotide-binding protein G(I)/G(S)/G(O) subunit gamma-12	1.38815	0.571883	43	2	No	6.43242e-05	4.19163
P60842	IF4A1_HUMAN	Eukaryotic initiation factor 4A-I	1.38758	0.401739	132	2	Yes	1.64711e-20	19.7833
P50914	RL14_HUMAN	60S ribosomal protein L14	1.38156	0.207333	57	2	Yes	1.23712e-19	18.9076
P25398	RS12_HUMAN	40S ribosomal protein S12	1.37668	0.222329	42	2	Yes	1.21746e-13	12.9145
Q7Z3Y8	K1C27_HUMAN	Keratin, type I cytoskeletal 27	1.37649	0.00911029	2	1	n/a	0.0108918	1.9629
P29966	MARCS_HUMAN	Myristoylated alanine-rich C-kinase substrate	1.37599	0.212952	47	2	Yes	9.46289e-16	15.024
P46778	RL21_HUMAN	60S ribosomal protein L21	1.36972	0.416409	79	2	Yes	1.64444e-11	10.784
Q07020	RL18_HUMAN	60S ribosomal protein L18	1.36625	0.240369	41	2	Yes	5.11872e-12	11.2908
P06753	TPM3_HUMAN	Tropomyosin alpha-3 chain	1.36526	0.344688	15	2	Yes	0.00124357	2.90533
P57721	PCBP3_HUMAN	Poly(rC)-binding protein 3	1.3637	0.142792	41	2	Yes	5.17896e-19	18.2858
Q4VXU2	PAP1L_HUMAN	Polyadenylate-binding protein 1-like	1.3604	0.0385758	10	2	Yes	1.86707e-09	8.72884
P08107	HS71B_HUMAN	Heat shock 70 kDa protein 1B; Heat shock 70 kDa protein 1A	1.35703	0.399647	276	2	Yes	5.67841e-37	36.2458
Q13765	NACA_HUMAN	Nascent polypeptide-associated complex subunit alpha	1.35545	0.290857	48	2	Yes	6.12402e-11	10.213
P08865	RSSA_HUMAN	40S ribosomal protein SA	1.35	0.322857	69	2	Yes	3.75014e-13	12.426
P20290	BTF3_HUMAN	Transcription factor BTF3	1.34923	0.089996	13	2	Yes	2.36582e-08	7.62602
Q15417	CNN3_HUMAN	Calponin-3	1.3466	0.106463	4	1	n/a	0.00735859	2.13321
P62280	RS11_HUMAN	40S ribosomal protein S11	1.34045	0.0988593	35	2	Yes	2.90352e-20	19.5371
Q96CW1	AP2M1_HUMAN	AP-2 complex subunit mu	1.33754	0.404954	3	1	n/a	0.285635	0.544188
P62263	RS14_HUMAN	40S ribosomal protein S14	1.3373	0.344928	70	2	Yes	1.02509e-11	10.9892
P02545	LMNA_HUMAN	Prelamin-A/C	1.33642	0.231164	459	2	Yes	3.22998e-115	114.491
Q15366	PCBP2_HUMAN	Poly(rC)-binding protein 2	1.3363	0.151522	78	2	Yes	1.88794e-31	30.724
P62277	RS13_HUMAN	40S ribosomal protein S13	1.33576	0.107914	13	2	Yes	2.31752e-07	6.63498
P67809	YBOX1_HUMAN	Nuclease-sensitive element-binding protein 1	1.32852	0.332011	79	2	Yes	2.98226e-13	12.5255
Q6P5R6	RL22L_HUMAN	60S ribosomal protein L22-like 1	1.32614	0.398857	11	1	n/a	0.0218586	1.66038
P09493	TPM1_HUMAN	Tropomyosin alpha-1 chain	1.3244	0.333538	20	2	Yes	0.000386264	3.41312
P13473	LAMP2_HUMAN	Lysosome-associated membrane glycoprotein 2	1.32137	0.184677	8	1	n/a	0.00170994	2.76702
P07814	SYEP_HUMAN	Bifunctional glutamate/proline--tRNA ligase	1.31816	0.265203	218	2	Yes	5.85668e-44	43.2323
Q9BVK6	TMED9_HUMAN	Transmembrane emp24 domain-containing protein 9	1.31539	0.143999	24	2	Yes	3.29973e-10	9.48152
P53007	TXTP_HUMAN	Tricarboxylate transport protein, mitochondrial	1.30819	0.11971	13	2	Yes	1.54757e-06	5.81035
Q14315	FLNC_HUMAN	Filamin-C	1.30339	0.48475	34	2	Yes	0.000927284	3.03279
Q5JRX3	PREP_HUMAN	Presequence protease, mitochondrial	1.30231	0.639797	40	2	Yes	0.00489421	2.31032
Q96SI9	STRBP_HUMAN	Spermatid perinuclear RNA-binding protein	1.29973	0.784025	16	2	No	0.148489	0.828306
P62701	RS4X_HUMAN	40S ribosomal protein S4, X isoform	1.28625	0.256514	87	2	Yes	7.7493e-17	16.1107
Q6RW13	ATRAP_HUMAN	Type-1 angiotensin II receptor-associated protein	1.2861	0.132213	4	1	n/a	0.0227456	1.6431
Q9UBR2	CATZ_HUMAN	Cathepsin Z	1.28369	0.291819	8	2	Yes	0.0333089	1.47744
Q9H361	PABP3_HUMAN	Polyadenylate-binding protein 3	1.2835	0.224514	24	2	Yes	3.16425e-06	5.49973
P46782	RS5_HUMAN	40S ribosomal protein S5	1.28342	0.223177	74	2	Yes	6.15646e-17	16.2107
P39656	OST48_HUMAN	Dolichyl-diphosphooligosaccharide--protein glycosyltransferase 48 kDa subunit	1.27834	0.154376	20	2	Yes	2.19037e-07	6.65948
Q9UQ80	PA2G4_HUMAN	Proliferation-associated protein 2G4	1.27558	0.227988	87	2	Yes	1.46259e-18	17.8349
P11279	LAMP1_HUMAN	Lysosome-associated membrane glycoprotein 1	1.27484	0.143753	15	2	Yes	5.15945e-06	5.2874
Q7Z7H5	TMED4_HUMAN	Transmembrane emp24 domain-containing protein 4	1.2725	0.327543	7	2	No	0.0789827	1.10247
Q14697	GANAB_HUMAN	Neutral alpha-glucosidase AB	1.27221	0.173086	200	2	Yes	9.64412e-56	55.0157
P30536	TSPOA_HUMAN	Translocator protein	1.2709	0.155267	9	2	Yes	0.00120693	2.91832
P13804	ETFA_HUMAN	Electron transfer flavoprotein subunit alpha, mitochondrial	1.26656	0.132647	134	2	Yes	1.55158e-48	47.8092
P17081	RHOQ_HUMAN	Rho-related GTP-binding protein RhoQ	1.26621	0.344963	12	2	Yes	0.0233594	1.63154
P61247	RS3A_HUMAN	40S ribosomal protein S3a	1.26311	0.332869	173	2	Yes	6.2682e-20	19.2029
P46781	RS9_HUMAN	40S ribosomal protein S9	1.261	0.318885	7	2	Yes	0.0826125	1.08295
Q9Y305	ACOT9_HUMAN	Acyl-coenzyme A thioesterase 9, mitochondrial	1.25978	0.157116	14	2	Yes	4.68101e-05	4.32966
P60953	CDC42_HUMAN	Cell division control protein 42 homolog	1.25418	0.315362	46	2	Yes	2.03802e-06	5.69079
Q9NZ01	TECR_HUMAN	Very-long-chain enoyl-CoA reductase	1.25338	0.105829	20	2	Yes	3.08817e-09	8.5103
Q6P1X6	CH082_HUMAN	UPF0598 protein C8orf82	1.25295	0.123023	3	1	n/a	0.0705988	1.1512
Q13162	PRDX4_HUMAN	Peroxiredoxin-4	1.24295	0.351546	60	2	Yes	1.54286e-06	5.81167
P22090	RS4Y1_HUMAN	40S ribosomal protein S4, Y isoform 1	1.2416	0.220945	21	2	Yes	7.75794e-05	4.11025
Q8TD47	RS4Y2_HUMAN	40S ribosomal protein S4, Y isoform 2	1.2416	0.220945	21	2	Yes	7.75794e-05	4.11025
Q8NBS9	TXND5_HUMAN	Thioredoxin domain-containing protein 5	1.23744	0.0963299	84	2	Yes	5.83162e-37	36.2342
Q9UIJ7	KAD3_HUMAN	GTP:AMP phosphotransferase AK3, mitochondrial	1.23715	0.063462	28	2	Yes	3.4381e-17	16.4637
P54709	AT1B3_HUMAN	Sodium/potassium-transporting ATPase subunit beta-3	1.23437	0.273229	12	2	Yes	0.014011	1.85353
O00159	MYO1C_HUMAN	Unconventional myosin-Ic	1.23259	0.303054	21	1	n/a	0.00216775	2.66399
Q13283	G3BP1_HUMAN	Ras GTPase-activating protein-binding protein 1	1.23172	0.211534	35	2	Yes	2.36187e-07	6.62674
P41091	IF2G_HUMAN	Eukaryotic translation initiation factor 2 subunit 3	1.22889	0.186662	14	2	Yes	0.000623643	3.20506
Q14137	BOP1_HUMAN	Ribosome biogenesis protein BOP1	1.22731	1.54054	6	2	No	0.736065	0.133084
Q53GQ0	DHB12_HUMAN	Very-long-chain 3-oxoacyl-CoA reductase	1.22682	0.204347	38	2	Yes	5.28889e-08	7.27664
P14314	GLU2B_HUMAN	Glucosidase 2 subunit beta	1.22342	0.175261	53	2	Yes	1.5431e-12	11.8116
Q96HE7	ERO1A_HUMAN	ERO1-like protein alpha	1.2228	0.139374	8	1	n/a	0.00272744	2.56424
Q9Y3F4	STRAP_HUMAN	Serine-threonine kinase receptor-associated protein	1.21495	0.456973	4	1	n/a	0.416232	0.380665
P54577	SYYC_HUMAN	Tyrosine--tRNA ligase, cytoplasmic	1.21366	0.143306	3	1	n/a	0.122909	0.910415
Q9H2U2	IPYR2_HUMAN	Inorganic pyrophosphatase 2, mitochondrial	1.21163	0.264165	91	2	Yes	2.3387e-11	10.631
P61916	NPC2_HUMAN	Epididymal secretory protein E1	1.21049	0.285517	50	2	Yes	3.88913e-06	5.41015
P04844	RPN2_HUMAN	Dolichyl-diphosphooligosaccharide--protein glycosyltransferase subunit 2	1.21032	0.165187	83	2	Yes	6.76964e-19	18.1694
Q86Y82	STX12_HUMAN	Syntaxin-12	1.20695	0.0213925	3	1	n/a	0.00354285	2.45065
Q9BZK3	NACP1_HUMAN	Putative nascent polypeptide-associated complex subunit alpha-like protein	1.20506	0.274257	3	1	n/a	0.324655	0.488578
P15153	RAC2_HUMAN	Ras-related C3 botulinum toxin substrate 2	1.20414	0.284465	23	2	Yes	0.00244696	2.61137
P60763	RAC3_HUMAN	Ras-related C3 botulinum toxin substrate 3	1.20414	0.284465	23	2	Yes	0.00244696	2.61137
P63000	RAC1_HUMAN	Ras-related C3 botulinum toxin substrate 1	1.20414	0.284465	23	2	Yes	0.00244696	2.61137
P61353	RL27_HUMAN	60S ribosomal protein L27	1.20308	0.315372	39	2	Yes	0.000273698	3.56273
Q03135	CAV1_HUMAN	Caveolin-1	1.19903	0.222014	29	2	Yes	4.84121e-05	4.31505
O14880	MGST3_HUMAN	Microsomal glutathione S-transferase 3	1.19871	0.59604	7	1	n/a	0.411699	0.38542
Q01082	SPTB2_HUMAN	Spectrin beta chain, non-erythrocytic 1	1.197	0.355073	72	2	Yes	1.22705e-05	4.91114
Q16643	DREB_HUMAN	Drebrin	1.19387	0.0317472	6	1	n/a	2.41746e-05	4.61664
Q13347	EIF3I_HUMAN	Eukaryotic translation initiation factor 3 subunit I	1.19191	0.00906559	7	2	Yes	3.43253e-08	7.46439
P04843	RPN1_HUMAN	Dolichyl-diphosphooligosaccharide--protein glycosyltransferase subunit 1	1.19121	0.194863	83	2	Yes	1.0455e-13	12.9807
Q96I99	SUCB2_HUMAN	Succinyl-CoA ligase [GDP-forming] subunit beta, mitochondrial	1.17912	0.362014	61	2	Yes	0.000279725	3.55327
O15372	EIF3H_HUMAN	Eukaryotic translation initiation factor 3 subunit H	1.17754	0.153186	9	1	n/a	0.00835677	2.07796
Q9NSB4	KRT82_HUMAN	Keratin, type II cuticular Hb2	1.17553	0.280838	12	2	No	0.055626	1.25472
Q9H845	ACAD9_HUMAN	Acyl-CoA dehydrogenase family member 9, mitochondrial	1.16498	0.341036	8	2	No	0.220244	0.657095
Q13813	SPTN1_HUMAN	Spectrin alpha chain, non-erythrocytic 1	1.16473	0.190513	146	2	Yes	2.28719e-19	18.6407
P55884	EIF3B_HUMAN	Eukaryotic translation initiation factor 3 subunit B	1.16325	0.666568	7	1	n/a	0.540995	0.266807
Q15286	RAB35_HUMAN	Ras-related protein Rab-35	1.16229	0.0538419	3	1	n/a	0.0347877	1.45857
A6NCN2	KR87P_HUMAN	Putative keratin-87 protein	1.15846	0.485663	37	2	Yes	0.055059	1.25917
P84095	RHOG_HUMAN	Rho-related GTP-binding protein RhoG	1.15585	0.378456	32	2	Yes	0.0267553	1.57259
O43809	CPSF5_HUMAN	Cleavage and polyadenylation specificity factor subunit 5	1.15125	0.226516	7	1	n/a	0.127716	0.893753
Q13310	PABP4_HUMAN	Polyadenylate-binding protein 4	1.14694	0.419231	79	2	Yes	0.00258126	2.58817
Q96BM9	ARL8A_HUMAN	ADP-ribosylation factor-like protein 8A	1.14256	0.14522	17	2	Yes	0.00105263	2.97773
Q9NVJ2	ARL8B_HUMAN	ADP-ribosylation factor-like protein 8B	1.14256	0.14522	17	2	Yes	0.00105263	2.97773
Q13263	TIF1B_HUMAN	Transcription intermediary factor 1-beta	1.14112	0.380802	32	2	Yes	0.0445826	1.35083
P34931	HS71L_HUMAN	Heat shock 70 kDa protein 1-like	1.14086	0.308358	164	2	Yes	2.64331e-08	7.57785
Q9H8H3	MET7A_HUMAN	Methyltransferase-like protein 7A	1.13614	0.285294	36	2	Yes	0.00713602	2.14654
Q9Y2B0	CNPY2_HUMAN	Protein canopy homolog 2	1.13514	0.168829	40	2	Yes	1.09214e-05	4.96172
Q58FF3	ENPLL_HUMAN	Putative endoplasmin-like protein	1.13505	0.209054	10	1	n/a	0.0714434	1.14604
Q9H4E5	RHOJ_HUMAN	Rho-related GTP-binding protein RhoJ	1.13504	0.12732	10	2	Yes	0.0100184	1.9992
Q6NZI2	PTRF_HUMAN	Polymerase I and transcript release factor	1.13458	0.313735	95	2	Yes	6.55902e-05	4.18316
P11940	PABP1_HUMAN	Polyadenylate-binding protein 1	1.13281	0.403381	87	2	Yes	0.00286593	2.54273
P23284	PPIB_HUMAN	Peptidyl-prolyl cis-trans isomerase B	1.13009	0.211588	233	2	Yes	6.1886e-18	17.2084
Q16698	DECR_HUMAN	2,4-dienoyl-CoA reductase, mitochondrial	1.12597	0.255589	122	2	Yes	2.8093e-07	6.5514
Q562R1	ACTBL_HUMAN	Beta-actin-like protein 2	1.12597	0.159599	126	2	Yes	7.07336e-15	14.1504
Q9BYX7	ACTBM_HUMAN	Putative beta-actin-like protein 3	1.1237	0.164026	100	2	Yes	2.38084e-11	10.6233
P68032	ACTC_HUMAN	Actin, alpha cardiac muscle 1	1.1219	0.143924	281	2	Yes	8.35103e-35	34.0783
P63267	ACTH_HUMAN	Actin, gamma-enteric smooth muscle	1.12165	0.129874	246	2	Yes	1.96445e-35	34.7068
P68133	ACTS_HUMAN	Actin, alpha skeletal muscle	1.12068	0.14265	280	2	Yes	1.25435e-34	33.9016
P62736	ACTA_HUMAN	Actin, aortic smooth muscle	1.12023	0.131393	247	2	Yes	2.06724e-34	33.6846
P60709	ACTB_HUMAN	Actin, cytoplasmic 1	1.11925	0.172495	659	2	Yes	7.28535e-58	57.1375
P63261	ACTG_HUMAN	Actin, cytoplasmic 2	1.11925	0.172495	659	2	Yes	7.28535e-58	57.1375
P61018	RAB4B_HUMAN	Ras-related protein Rab-4B	1.11658	0.84586	4	1	n/a	0.800722	0.0965185
P50402	EMD_HUMAN	Emerin	1.11524	0.0737392	12	2	Yes	0.000295707	3.52914
Q8NBJ5	GT251_HUMAN	Procollagen galactosyltransferase 1	1.11519	0.0486908	3	1	n/a	0.0547174	1.26187
Q6S8J3	POTEE_HUMAN	POTE ankyrin domain family member E	1.11213	0.178624	174	2	Yes	3.30728e-14	13.4805
Q9BS26	ERP44_HUMAN	Endoplasmic reticulum resident protein 44	1.11172	0.322695	8	1	n/a	0.360094	0.443584
P0CG38	POTEI_HUMAN	POTE ankyrin domain family member I	1.11108	0.17415	83	2	Yes	1.1791e-07	6.92845
P0CG39	POTEJ_HUMAN	POTE ankyrin domain family member J	1.11108	0.17415	83	2	Yes	1.1791e-07	6.92845
A5A3E0	POTEF_HUMAN	POTE ankyrin domain family member F	1.11081	0.166342	106	2	Yes	5.13143e-10	9.28976
P49748	ACADV_HUMAN	Very long-chain specific acyl-CoA dehydrogenase, mitochondrial	1.10903	0.245001	65	2	Yes	0.000651975	3.18577
P61019	RAB2A_HUMAN	Ras-related protein Rab-2A	1.10587	0.350645	26	2	No	0.136742	0.864099
Q16658	FSCN1_HUMAN	Fascin	1.10285	0.206416	55	2	Yes	0.000521129	3.28305
Q9H0U4	RAB1B_HUMAN	Ras-related protein Rab-1B	1.09981	0.179753	42	2	Yes	0.000871973	3.0595
P31937	3HIDH_HUMAN	3-hydroxyisobutyrate dehydrogenase, mitochondrial	1.09829	0.198517	18	2	Yes	0.0518885	1.28493
P17066	HSP76_HUMAN	Heat shock 70 kDa protein 6	1.0959	0.25132	79	2	Yes	0.00109968	2.95873
P05556	ITB1_HUMAN	Integrin beta-1	1.09205	0.196553	267	2	Yes	3.67258e-13	12.435
Q92928	RAB1C_HUMAN	Putative Ras-related protein Rab-1C	1.09055	0.16031	37	2	Yes	0.00153849	2.81291
Q9ULV4	COR1C_HUMAN	Coronin-1C	1.08777	0.079237	18	2	Yes	0.000241061	3.61787
Q15084	PDIA6_HUMAN	Protein disulfide-isomerase A6	1.0838	0.167485	133	2	Yes	5.43359e-08	7.26491
O95182	NDUA7_HUMAN	NADH dehydrogenase [ubiquinone] 1 alpha subcomplex subunit 7	1.08341	0.127478	5	1	n/a	0.217274	0.662993
P19367	HXK1_HUMAN	Hexokinase-1	1.08276	0.1876	92	2	Yes	5.58011e-05	4.25336
P78385	KRT83_HUMAN	Keratin, type II cuticular Hb3	1.08103	0.275906	68	2	Yes	0.0181967	1.74001
P62820	RAB1A_HUMAN	Ras-related protein Rab-1A	1.07784	0.17994	65	2	Yes	0.000894157	3.04859
Q12904	AIMP1_HUMAN	Aminoacyl tRNA synthase complex-interacting multifunctional protein 1	1.07589	0.0329212	3	1	n/a	0.0573779	1.24126
P48741	HSP77_HUMAN	Putative heat shock 70 kDa protein 7	1.07518	0.153892	32	2	Yes	0.00967706	2.01426
P30101	PDIA3_HUMAN	Protein disulfide-isomerase A3	1.07346	0.170178	374	2	Yes	1.37975e-15	14.8602
P07686	HEXB_HUMAN	Beta-hexosaminidase subunit beta	1.07333	0.18114	5	1	n/a	0.416555	0.380328
P54136	SYRC_HUMAN	Arginine--tRNA ligase, cytoplasmic	1.0721	0.286031	10	1	n/a	0.445902	0.35076
P27797	CALR_HUMAN	Calreticulin	1.07167	0.210125	198	2	Yes	3.15083e-06	5.50158
O43678	NDUA2_HUMAN	NADH dehydrogenase [ubiquinone] 1 alpha subcomplex subunit 2	1.06569	0.0312023	3	1	n/a	0.0676711	1.1696
P62140	PP1B_HUMAN	Serine/threonine-protein phosphatase PP1-beta catalytic subunit	1.05951	0.292255	39	2	Yes	0.211415	0.674864
Q6DD88	ATLA3_HUMAN	Atlastin-3	1.05904	0.316718	24	2	No	0.371003	0.430622
O00154	BACH_HUMAN	Cytosolic acyl coenzyme A thioester hydrolase	1.04816	0.298419	5	1	n/a	0.736476	0.132841
O95202	LETM1_HUMAN	LETM1 and EF-hand domain-containing protein 1, mitochondrial	1.04745	0.292372	5	1	n/a	0.735043	0.133687
O00303	EIF3F_HUMAN	Eukaryotic translation initiation factor 3 subunit F	1.04592	0.328329	15	1	n/a	0.596579	0.224332
P30084	ECHM_HUMAN	Enoyl-CoA hydratase, mitochondrial	1.04145	0.165302	89	2	Yes	0.0202239	1.69414
O43790	KRT86_HUMAN	Keratin, type II cuticular Hb6	1.04127	0.225287	64	2	Yes	0.147789	0.830357
Q14533	KRT81_HUMAN	Keratin, type II cuticular Hb1	1.0351	0.276951	76	2	Yes	0.272774	0.564198
O95571	ETHE1_HUMAN	Persulfide dioxygenase ETHE1, mitochondrial	1.03471	0.604536	5	1	n/a	0.904046	0.0438095
P36873	PP1G_HUMAN	Serine/threonine-protein phosphatase PP1-gamma catalytic subunit	1.03333	0.267501	37	2	Yes	0.453546	0.343379
P62136	PP1A_HUMAN	Serine/threonine-protein phosphatase PP1-alpha catalytic subunit	1.03333	0.267501	37	2	Yes	0.453546	0.343379
Q13155	AIMP2_HUMAN	Aminoacyl tRNA synthase complex-interacting multifunctional protein 2	1.02925	0.388056	25	2	Yes	0.709706	0.148921
P11021	GRP78_HUMAN	78 kDa glucose-regulated protein	1.02613	0.154294	481	2	Yes	0.00022741	3.64319
Q9Y266	NUDC_HUMAN	Nuclear migration protein nudC	1.02164	0.291046	3	1	n/a	0.909331	0.0412779
P31947	1433S_HUMAN	14-3-3 protein sigma	1.01996	0.742729	142	2	Yes	0.749224	0.125388
P54652	HSP72_HUMAN	Heat shock-related 70 kDa protein 2	1.01777	0.16366	254	2	Yes	0.0847024	1.0721
Q14011	CIRBP_HUMAN	Cold-inducible RNA-binding protein	1.01661	0.252656	5	1	n/a	0.890248	0.050489
P11142	HSP7C_HUMAN	Heat shock cognate 71 kDa protein	1.01284	0.162206	689	2	Yes	0.0381515	1.41849
O15144	ARPC2_HUMAN	Actin-related protein 2/3 complex subunit 2	1.01123	0.628415	6	1	n/a	0.96677	0.014677
P63167	DYL1_HUMAN	Dynein light chain 1, cytoplasmic	1.01089	0.0712258	25	2	Yes	0.452372	0.344505
Q8N1W1	ARG28_HUMAN	Rho guanine nucleotide exchange factor 28	1.01046	0.0220602	3	1	n/a	0.497688	0.303043
Q03252	LMNB2_HUMAN	Lamin-B2	1.01011	0.296832	37	2	Yes	0.837025	0.0772616
O60884	DNJA2_HUMAN	DnaJ homolog subfamily A member 2	1.0095	0.0519794	11	1	n/a	0.557854	0.253479
P53597	SUCA_HUMAN	Succinyl-CoA ligase [ADP/GDP-forming] subunit alpha, mitochondrial	1.00731	0.271339	53	2	Yes	0.845361	0.0729576
Q99832	TCPH_HUMAN	T-complex protein 1 subunit eta	1.00254	0.167489	141	2	Yes	0.85762	0.0667049
Q8N183	MIMIT_HUMAN	Mimitin, mitochondrial	1.00122	0.171964	3	1	n/a	0.991337	0.00377847
P00491	PNPH_HUMAN	Purine nucleoside phosphorylase	0.99934	0.139974	6	1	n/a	0.99123	0.00382577
P12074	CX6A1_HUMAN	Cytochrome c oxidase subunit 6A1, mitochondrial	0.996743	0.00556263	7	1	n/a	0.172308	0.763694
Q14444	CAPR1_HUMAN	Caprin-1	0.995975	0.167681	6	1	n/a	0.955393	0.0198181
P45880	VDAC2_HUMAN	Voltage-dependent anion-selective channel protein 2	0.992213	0.183122	182	2	Yes	0.566883	0.246506
P78386	KRT85_HUMAN	Keratin, type II cuticular Hb5	0.991521	0.283871	64	2	Yes	0.811927	0.0904831
Q9NUJ1	ABHDA_HUMAN	Mycophenolic acid acyl-glucuronide esterase, mitochondrial	0.988974	0.118997	11	1	n/a	0.764918	0.116385
Q9Y3Y2	CHTOP_HUMAN	Chromatin target of PRMT1 protein	0.988408	0.125212	12	2	Yes	0.75503	0.122036
P12956	XRCC6_HUMAN	X-ray repair cross-complementing protein 6	0.988179	0.200073	129	2	Yes	0.503414	0.298075
Q10713	MPPA_HUMAN	Mitochondrial-processing peptidase subunit alpha	0.988131	0.263672	32	2	Yes	0.800733	0.0965124
Q9NYL9	TMOD3_HUMAN	Tropomodulin-3	0.986369	0.143185	4	1	n/a	0.86115	0.0649212
P09543	CN37_HUMAN	2',3'-cyclic-nucleotide 3'-phosphodiesterase	0.98373	0.211001	6	1	n/a	0.857613	0.0667085
P14625	ENPL_HUMAN	Endoplasmin	0.983186	0.170216	414	2	Yes	0.0450985	1.34584
Q15738	NSDHL_HUMAN	Sterol-4-alpha-carboxylate 3-dehydrogenase, decarboxylating	0.982027	0.170332	35	2	Yes	0.536762	0.270218
Q00325	MPCP_HUMAN	Phosphate carrier protein, mitochondrial	0.981259	0.237968	53	2	Yes	0.568941	0.244933
Q16836	HCDH_HUMAN	Hydroxyacyl-coenzyme A dehydrogenase, mitochondrial	0.978934	0.156683	82	2	Yes	0.227002	0.64397
Q9Y265	RUVB1_HUMAN	RuvB-like 1	0.973594	0.151218	32	2	Yes	0.331152	0.479972
P04899	GNAI2_HUMAN	Guanine nucleotide-binding protein G(i) subunit alpha-2	0.973325	0.109121	21	2	Yes	0.27658	0.558179
Q9UII2	ATIF1_HUMAN	ATPase inhibitor, mitochondrial	0.97118	0.139143	7	2	Yes	0.607254	0.216629
Q9NSE4	SYIM_HUMAN	Isoleucine--tRNA ligase, mitochondrial	0.970614	0.17003	163	2	Yes	0.0287624	1.54117
P26006	ITA3_HUMAN	Integrin alpha-3	0.966258	0.224447	35	2	No	0.38024	0.419943
Q9Y4L1	HYOU1_HUMAN	Hypoxia up-regulated protein 1	0.965767	0.138826	64	2	Yes	0.0529892	1.27581
P38919	IF4A3_HUMAN	Eukaryotic initiation factor 4A-III	0.963588	0.478208	38	2	Yes	0.641632	0.192714
P17987	TCPA_HUMAN	T-complex protein 1 subunit alpha	0.961771	0.135744	94	2	Yes	0.00757998	2.12033
P78371	TCPB_HUMAN	T-complex protein 1 subunit beta	0.959872	0.168848	164	2	Yes	0.00272913	2.56398
Q9UHX1	PUF60_HUMAN	Poly(U)-binding-splicing factor PUF60	0.9589	0.00161658	4	1	n/a	1.67511e-05	4.77596
Q99798	ACON_HUMAN	Aconitate hydratase, mitochondrial	0.956517	0.212799	92	2	Yes	0.0530948	1.27495
Q13501	SQSTM_HUMAN	Sequestosome-1	0.953986	0.143805	37	2	Yes	0.0596793	1.22418
P49368	TCPG_HUMAN	T-complex protein 1 subunit gamma	0.952872	0.127243	112	2	Yes	0.000154431	3.81127
P50991	TCPD_HUMAN	T-complex protein 1 subunit delta	0.943719	0.133682	85	2	Yes	0.000207462	3.68306
Q9UK45	LSM7_HUMAN	U6 snRNA-associated Sm-like protein LSm7	0.940487	0.0502285	6	2	Yes	0.0440174	1.35638
O00571	DDX3X_HUMAN	ATP-dependent RNA helicase DDX3X	0.930026	0.272663	90	2	Yes	0.0169272	1.77141
Q01844	EWS_HUMAN	RNA-binding protein EWS	0.929466	0.183432	45	2	Yes	0.0133982	1.87295
P40227	TCPZ_HUMAN	T-complex protein 1 subunit zeta	0.928428	0.120495	103	2	Yes	2.72735e-08	7.56426
P49411	EFTU_HUMAN	Elongation factor Tu, mitochondrial	0.925081	0.338638	155	2	Yes	0.00659367	2.18087
P13010	XRCC5_HUMAN	X-ray repair cross-complementing protein 5	0.924908	0.199546	208	2	Yes	1.59991e-07	6.7959
P60468	SC61B_HUMAN	Protein transport protein Sec61 subunit beta	0.924164	0.0601027	3	1	n/a	0.160448	0.794666
P09622	DLDH_HUMAN	Dihydrolipoyl dehydrogenase, mitochondrial	0.923542	0.160303	78	2	Yes	6.87572e-05	4.16268
P13667	PDIA4_HUMAN	Protein disulfide-isomerase A4	0.922513	0.146034	138	2	Yes	5.36299e-09	8.27059
Q6YHK3	CD109_HUMAN	CD109 antigen	0.92235	0.156411	56	2	Yes	0.00048314	3.31593
Q9HA77	SYCM_HUMAN	Probable cysteine--tRNA ligase, mitochondrial	0.922054	0.518014	11	1	n/a	0.628538	0.201669
P50454	SERPH_HUMAN	Serpin H1	0.921446	0.180502	130	2	Yes	2.1763e-06	5.66228
P08779	K1C16_HUMAN	Keratin, type I cytoskeletal 16	0.914025	0.37025	206	2	No	0.00102081	2.99105
Q14257	RCN2_HUMAN	Reticulocalbin-2	0.913576	0.258651	10	2	No	0.321546	0.492756
P30048	PRDX3_HUMAN	Thioredoxin-dependent peroxide reductase, mitochondrial	0.913287	0.144123	100	2	Yes	3.08308e-08	7.51101
P55265	DSRAD_HUMAN	Double-stranded RNA-specific adenosine deaminase	0.910558	0.3519	19	2	Yes	0.283337	0.547697
Q13011	ECH1_HUMAN	Delta(3,5)-Delta(2,4)-dienoyl-CoA isomerase, mitochondrial	0.910239	0.104614	57	2	Yes	2.69406e-08	7.56959
P11310	ACADM_HUMAN	Medium-chain specific acyl-CoA dehydrogenase, mitochondrial	0.909971	0.152125	54	2	Yes	6.39958e-05	4.19385
Q9NX63	MIC19_HUMAN	MICOS complex subunit MIC19	0.909759	0.142363	42	2	Yes	0.000191797	3.71716
P50990	TCPQ_HUMAN	T-complex protein 1 subunit theta	0.908085	0.156819	101	2	Yes	5.31148e-08	7.27478
P61026	RAB10_HUMAN	Ras-related protein Rab-10	0.905702	0.177363	10	2	Yes	0.131213	0.882022
Q16630	CPSF6_HUMAN	Cleavage and polyadenylation specificity factor subunit 6	0.90189	0.0965698	30	2	Yes	5.94283e-06	5.22601
P48643	TCPE_HUMAN	T-complex protein 1 subunit epsilon	0.899289	0.186099	142	2	Yes	1.70409e-09	8.76851
P07954	FUMH_HUMAN	Fumarate hydratase, mitochondrial	0.898809	0.119442	301	2	Yes	3.48962e-37	36.4572
Q15907	RB11B_HUMAN	Ras-related protein Rab-11B	0.894144	0.256613	13	2	Yes	0.165019	0.782466
P02533	K1C14_HUMAN	Keratin, type I cytoskeletal 14	0.893445	0.354554	703	2	No	6.51737e-15	14.1859
P27824	CALX_HUMAN	Calnexin	0.887894	0.20109	172	2	Yes	9.90124e-12	11.0043
P21796	VDAC1_HUMAN	Voltage-dependent anion-selective channel protein 1	0.887549	0.112168	339	2	Yes	4.568e-53	52.3403
O75369	FLNB_HUMAN	Filamin-B	0.885148	0.260664	572	2	Yes	7.62979e-24	23.1175
P14136	GFAP_HUMAN	Glial fibrillary acidic protein	0.885086	0.275221	53	2	Yes	0.00373137	2.42813
Q9H9B4	SFXN1_HUMAN	Sideroflexin-1	0.884238	0.271226	28	2	Yes	0.0325349	1.48765
Q12906	ILF3_HUMAN	Interleukin enhancer-binding factor 3	0.880901	0.131568	69	2	Yes	1.76881e-10	9.75232
Q13185	CBX3_HUMAN	Chromobox protein homolog 3	0.875525	0.197015	38	2	Yes	0.000409449	3.3878
P62834	RAP1A_HUMAN	Ras-related protein Rap-1A	0.869211	0.109848	32	2	Yes	1.82292e-07	6.73923
P62491	RB11A_HUMAN	Ras-related protein Rab-11A	0.864764	0.291881	19	2	Yes	0.0594767	1.22565
Q9Y6C9	MTCH2_HUMAN	Mitochondrial carrier homolog 2	0.864098	0.154388	33	2	Yes	1.82558e-05	4.7386
P49720	PSB3_HUMAN	Proteasome subunit beta type-3	0.857821	0.659384	5	1	n/a	0.654895	0.183828
Q8WXF1	PSPC1_HUMAN	Paraspeckle component 1	0.856817	0.726518	21	2	No	0.37776	0.422784
P10606	COX5B_HUMAN	Cytochrome c oxidase subunit 5B, mitochondrial	0.8544	0.0309844	6	1	n/a	8.67639e-05	4.06166
Q3SY69	AL1L2_HUMAN	Mitochondrial 10-formyltetrahydrofolate dehydrogenase	0.854395	0.295009	56	2	Yes	0.000517076	3.28645
P45973	CBX5_HUMAN	Chromobox protein homolog 5	0.852722	0.0694444	15	2	Yes	1.67324e-06	5.77644
P13645	K1C10_HUMAN	Keratin, type I cytoskeletal 10	0.852634	0.496869	49	2	No	0.0433768	1.36274
O14602	IF1AY_HUMAN	Eukaryotic translation initiation factor 1A, Y-chromosomal	0.848946	0.387207	3	1	n/a	0.568892	0.24497
P47813	IF1AX_HUMAN	Eukaryotic translation initiation factor 1A, X-chromosomal	0.848946	0.387207	3	1	n/a	0.568892	0.24497
A6NIZ1	RP1BL_HUMAN	Ras-related protein Rap-1b-like protein	0.848914	0.127515	45	2	Yes	5.61437e-10	9.2507
P61224	RAP1B_HUMAN	Ras-related protein Rap-1b	0.848914	0.127515	45	2	Yes	5.61437e-10	9.2507
Q9C075	K1C23_HUMAN	Keratin, type I cytoskeletal 23	0.847018	0.754642	8	2	No	0.587218	0.231201
P42765	THIM_HUMAN	3-ketoacyl-CoA thiolase, mitochondrial	0.840485	0.132221	106	2	Yes	2.87506e-22	21.5414
P55809	SCOT1_HUMAN	Succinyl-CoA:3-ketoacid coenzyme A transferase 1, mitochondrial	0.840169	0.209639	51	2	Yes	1.65662e-06	5.78078
O96000	NDUBA_HUMAN	NADH dehydrogenase [ubiquinone] 1 beta subcomplex subunit 10	0.8385	0.165052	33	2	Yes	3.62135e-06	5.44113
Q15392	DHC24_HUMAN	Delta(24)-sterol reductase	0.833461	0.218247	46	2	Yes	5.39083e-06	5.26834
Q9NSB2	KRT84_HUMAN	Keratin, type II cuticular Hb4	0.832936	0.384386	79	2	Yes	0.000231879	3.63474
O15523	DDX3Y_HUMAN	ATP-dependent RNA helicase DDX3Y	0.83257	0.210981	54	2	Yes	3.54772e-07	6.45005
P35637	FUS_HUMAN	RNA-binding protein FUS	0.831562	0.120987	86	2	Yes	1.20449e-21	20.9192
O00264	PGRC1_HUMAN	Membrane-associated progesterone receptor component 1	0.830324	0.122602	11	2	No	0.0013089	2.88309
Q8N1N4	K2C78_HUMAN	Keratin, type II cytoskeletal 78	0.825814	0.304919	53	2	Yes	0.000122676	3.91124
P13637	AT1A3_HUMAN	Sodium/potassium-transporting ATPase subunit alpha-3	0.823855	0.138834	100	2	Yes	2.12087e-22	21.6735
P50993	AT1A2_HUMAN	Sodium/potassium-transporting ATPase subunit alpha-2	0.823855	0.138834	100	2	Yes	2.12087e-22	21.6735
Q02790	FKBP4_HUMAN	Peptidyl-prolyl cis-trans isomerase FKBP4	0.823367	0.295257	3	1	n/a	0.408976	0.388303
Q9Y4P3	TBL2_HUMAN	Transducin beta-like protein 2	0.823214	0.274741	3	1	n/a	0.381031	0.41904
O75251	NDUS7_HUMAN	NADH dehydrogenase [ubiquinone] iron-sulfur protein 7, mitochondrial	0.822454	0.0934024	4	1	n/a	0.0319665	1.49531
P13646	K1C13_HUMAN	Keratin, type I cytoskeletal 13	0.821698	0.302199	42	2	No	0.000450342	3.34646
Q9H3N1	TMX1_HUMAN	Thioredoxin-related transmembrane protein 1	0.819545	0.223741	14	2	Yes	0.0107071	1.97033
O43181	NDUS4_HUMAN	NADH dehydrogenase [ubiquinone] iron-sulfur protein 4, mitochondrial	0.817463	0.224056	19	2	Yes	0.00245586	2.6098
P40939	ECHA_HUMAN	Trifunctional enzyme subunit alpha, mitochondrial	0.817313	0.162202	294	2	Yes	4.09262e-54	53.388
P20648	ATP4A_HUMAN	Potassium-transporting ATPase alpha chain 1	0.816515	0.112461	10	2	Yes	0.000864279	3.06335
Q16891	MIC60_HUMAN	MICOS complex subunit MIC60	0.815453	0.192048	42	2	Yes	2.26212e-07	6.64548
Q16718	NDUA5_HUMAN	NADH dehydrogenase [ubiquinone] 1 alpha subcomplex subunit 5	0.815293	0.196403	26	2	Yes	6.98731e-05	4.15569
Q9BPW8	NIPS1_HUMAN	Protein NipSnap homolog 1	0.814242	0.216178	14	2	No	0.00742121	2.12953
Q7Z3Y7	K1C28_HUMAN	Keratin, type I cytoskeletal 28	0.813944	0.341987	11	2	No	0.10466	0.980218
P05023	AT1A1_HUMAN	Sodium/potassium-transporting ATPase subunit alpha-1	0.813926	0.161551	197	2	Yes	7.46123e-38	37.1272
P54886	P5CS_HUMAN	Delta-1-pyrroline-5-carboxylate synthase	0.813242	0.109487	47	2	Yes	3.09612e-15	14.5092
O60506	HNRPQ_HUMAN	Heterogeneous nuclear ribonucleoprotein Q	0.812646	0.177366	124	2	Yes	8.13179e-22	21.0898
P56537	IF6_HUMAN	Eukaryotic translation initiation factor 6	0.810316	0.136149	31	2	Yes	1.48703e-08	7.82768
P20800	EDN2_HUMAN	Endothelin-2	0.807284	0.0699471	3	1	n/a	0.0412161	1.38493
P00403	COX2_HUMAN	Cytochrome c oxidase subunit 2	0.807153	0.126527	27	2	Yes	2.82255e-08	7.54936
Q96PK6	RBM14_HUMAN	RNA-binding protein 14	0.806376	0.239102	25	2	No	0.00049807	3.30271
P55084	ECHB_HUMAN	Trifunctional enzyme subunit beta, mitochondrial	0.803084	0.143249	99	2	Yes	2.3064e-24	23.6371
Q9BZZ5	API5_HUMAN	Apoptosis inhibitor 5	0.800772	0.266764	37	2	No	6.32966e-05	4.19862
P43304	GPDM_HUMAN	Glycerol-3-phosphate dehydrogenase, mitochondrial	0.799667	0.249474	11	2	Yes	0.0259045	1.58662
O75947	ATP5H_HUMAN	ATP synthase subunit d, mitochondrial	0.79456	0.126656	92	2	Yes	2.99991e-27	26.5229
Q99714	HCD2_HUMAN	3-hydroxyacyl-CoA dehydrogenase type-2	0.792281	0.239324	118	2	Yes	5.19407e-16	15.2845
O75531	BAF_HUMAN	Barrier-to-autointegration factor	0.792069	0.205918	61	2	Yes	8.51093e-11	10.07
Q9BSH4	TACO1_HUMAN	Translational activator of cytochrome c oxidase 1	0.7905	0.0778826	7	1	n/a	0.000387027	3.41226
Q13242	SRSF9_HUMAN	Serine/arginine-rich splicing factor 9	0.788314	0.564494	8	2	No	0.329661	0.481933
P35232	PHB_HUMAN	Prohibitin	0.785042	0.104637	157	2	Yes	7.60112e-58	57.1191
P51149	RAB7A_HUMAN	Ras-related protein Rab-7a	0.783321	0.097319	34	2	Yes	2.68097e-14	13.5717
P25705	ATPA_HUMAN	ATP synthase subunit alpha, mitochondrial	0.782478	0.120643	383	2	Yes	4.09331e-122	121.388
P14854	CX6B1_HUMAN	Cytochrome c oxidase subunit 6B1	0.782102	0.0732573	42	2	Yes	7.43724e-22	21.1286
P23434	GCSH_HUMAN	Glycine cleavage system H protein, mitochondrial	0.780898	0.16187	14	2	Yes	0.000277696	3.55643
P16989	YBOX3_HUMAN	Y-box-binding protein 3	0.780608	0.102898	11	2	Yes	5.84644e-05	4.23311
O14684	PTGES_HUMAN	Prostaglandin E synthase	0.780128	0.0819935	4	1	n/a	0.012687	1.89664
P61106	RAB14_HUMAN	Ras-related protein Rab-14	0.776064	0.00264872	6	1	n/a	4.98166e-11	10.3026
O00232	PSD12_HUMAN	26S proteasome non-ATPase regulatory subunit 12	0.774686	0.575245	19	1	n/a	0.104955	0.978997
P78527	PRKDC_HUMAN	DNA-dependent protein kinase catalytic subunit	0.772504	0.165107	273	2	Yes	7.3611e-65	64.1331
Q92945	FUBP2_HUMAN	Far upstream element-binding protein 2	0.771931	0.169275	72	2	Yes	1.1401e-17	16.9431
P47985	UCRI_HUMAN	Cytochrome b-c1 complex subunit Rieske, mitochondrial	0.770118	0.175319	20	2	Yes	1.49087e-05	4.82656
P28331	NDUS1_HUMAN	NADH-ubiquinone oxidoreductase 75 kDa subunit, mitochondrial	0.769651	0.172441	60	2	Yes	8.62935e-15	14.064
P16435	NCPR_HUMAN	NADPH--cytochrome P450 reductase	0.768027	0.141891	18	2	No	3.35185e-06	5.47472
P51148	RAB5C_HUMAN	Ras-related protein Rab-5C	0.76734	0.115816	11	1	n/a	5.61977e-05	4.25028
Q96AE4	FUBP1_HUMAN	Far upstream element-binding protein 1	0.767009	0.155769	50	2	Yes	3.91538e-14	13.4072
O00217	NDUS8_HUMAN	NADH dehydrogenase [ubiquinone] iron-sulfur protein 8, mitochondrial	0.765888	0.0918412	8	2	Yes	0.000360596	3.44298
P40926	MDHM_HUMAN	Malate dehydrogenase, mitochondrial	0.765627	0.126084	375	2	Yes	2.0785e-123	122.682
A8MTJ3	GNAT3_HUMAN	Guanine nucleotide-binding protein G(t) subunit alpha-3	0.765537	0.00302406	3	1	n/a	5.54465e-05	4.25613
P09471	GNAO_HUMAN	Guanine nucleotide-binding protein G(o) subunit alpha	0.765537	0.00302406	3	1	n/a	5.54465e-05	4.25613
P11488	GNAT1_HUMAN	Guanine nucleotide-binding protein G(t) subunit alpha-1	0.765537	0.00302406	3	1	n/a	5.54465e-05	4.25613
P19087	GNAT2_HUMAN	Guanine nucleotide-binding protein G(t) subunit alpha-2	0.765537	0.00302406	3	1	n/a	5.54465e-05	4.25613
P38405	GNAL_HUMAN	Guanine nucleotide-binding protein G(olf) subunit alpha	0.765537	0.00302406	3	1	n/a	5.54465e-05	4.25613
P63092	GNAS2_HUMAN	Guanine nucleotide-binding protein G(s) subunit alpha isoforms short	0.765537	0.00302406	3	1	n/a	5.54465e-05	4.25613
P63096	GNAI1_HUMAN	Guanine nucleotide-binding protein G(i) subunit alpha-1	0.765537	0.00302406	3	1	n/a	5.54465e-05	4.25613
Q5JWF2	GNAS1_HUMAN	Guanine nucleotide-binding protein G(s) subunit alpha isoforms XLas	0.765537	0.00302406	3	1	n/a	5.54465e-05	4.25613
Q08945	SSRP1_HUMAN	FACT complex subunit SSRP1	0.764609	0.220905	15	2	Yes	0.00119147	2.92392
Q13838	DX39B_HUMAN	Spliceosome RNA helicase DDX39B	0.76414	0.115229	107	2	Yes	1.10179e-39	38.9579
Q9Y5M8	SRPRB_HUMAN	Signal recognition particle receptor subunit beta	0.761105	0.0425589	21	2	Yes	3.14452e-16	15.5024
P55795	HNRH2_HUMAN	Heterogeneous nuclear ribonucleoprotein H2	0.76033	0.272587	162	2	Yes	7.72111e-22	21.1123
P30040	ERP29_HUMAN	Endoplasmic reticulum resident protein 29	0.760002	0.135877	36	2	Yes	2.58367e-12	11.5878
Q99623	PHB2_HUMAN	Prohibitin-2	0.759444	0.15124	95	2	Yes	1.60702e-27	26.794
P62873	GBB1_HUMAN	Guanine nucleotide-binding protein G(I)/G(S)/G(T) subunit beta-1	0.758648	0.22464	58	2	Yes	3.87824e-11	10.4114
Q16740	CLPP_HUMAN	ATP-dependent Clp protease proteolytic subunit, mitochondrial	0.75565	0.282151	4	1	n/a	0.18169	0.740669
P61020	RAB5B_HUMAN	Ras-related protein Rab-5B	0.754786	0.142924	3	1	n/a	0.0970366	1.01306
Q96AB3	ISOC2_HUMAN	Isochorismatase domain-containing protein 2	0.753376	0.310425	3	1	n/a	0.302626	0.519094
P42126	ECI1_HUMAN	Enoyl-CoA delta isomerase 1, mitochondrial	0.748802	0.0911669	25	2	Yes	1.34062e-12	11.8727
P0C7P4	UCRIL_HUMAN	Putative cytochrome b-c1 complex subunit Rieske-like protein 1	0.748375	0.14382	9	1	n/a	0.000775005	3.1107
P48047	ATPO_HUMAN	ATP synthase subunit O, mitochondrial	0.745273	0.167108	116	2	Yes	8.20938e-32	31.0857
P24539	AT5F1_HUMAN	ATP synthase F(0) complex subunit B1, mitochondrial	0.744009	0.0878209	66	2	Yes	2.26079e-33	32.6457
P06576	ATPB_HUMAN	ATP synthase subunit beta, mitochondrial	0.74257	0.1287	620	2	Yes	1.58504e-218	217.8
Q02218	ODO1_HUMAN	2-oxoglutarate dehydrogenase, mitochondrial	0.740994	0.129879	63	2	Yes	2.84132e-23	22.5465
Q13148	TADBP_HUMAN	TAR DNA-binding protein 43	0.739728	0.158955	87	2	Yes	4.30644e-26	25.3659
O75390	CISY_HUMAN	Citrate synthase, mitochondrial	0.737957	0.103403	78	2	Yes	3.45357e-35	34.4617
P62879	GBB2_HUMAN	Guanine nucleotide-binding protein G(I)/G(S)/G(T) subunit beta-2	0.737152	0.159415	38	2	Yes	4.01477e-12	11.3963
P61978	HNRPK_HUMAN	Heterogeneous nuclear ribonucleoprotein K	0.735009	0.107236	317	2	Yes	1.50815e-136	135.822
Q9UBM7	DHCR7_HUMAN	7-dehydrocholesterol reductase	0.734624	0.0618912	3	1	n/a	0.017652	1.75321
O00483	NDUA4_HUMAN	Cytochrome c oxidase subunit NDUFA4	0.733881	0.0864625	3	1	n/a	0.0334324	1.47583
Q12905	ILF2_HUMAN	Interleukin enhancer-binding factor 2	0.732524	0.211012	37	2	Yes	4.73956e-09	8.32426
O00148	DX39A_HUMAN	ATP-dependent RNA helicase DDX39A	0.731811	0.107715	82	2	Yes	2.08425e-36	35.6811
O75489	NDUS3_HUMAN	NADH dehydrogenase [ubiquinone] iron-sulfur protein 3, mitochondrial	0.728635	0.0361777	13	2	Yes	2.05689e-11	10.6868
P36542	ATPG_HUMAN	ATP synthase subunit gamma, mitochondrial	0.724664	0.146678	52	2	Yes	2.39917e-18	17.6199
P84243	H33_HUMAN	Histone H3.3	0.722025	0.166574	104	2	Yes	1.45562e-31	30.837
P35221	CTNA1_HUMAN	Catenin alpha-1	0.720838	0.705439	15	2	No	0.149331	0.825849
Q9HAV0	GBB4_HUMAN	Guanine nucleotide-binding protein subunit beta-4	0.7184	0.165149	28	2	Yes	1.72497e-09	8.76322
P14406	CX7A2_HUMAN	Cytochrome c oxidase subunit 7A2, mitochondrial	0.718287	0.0462495	16	2	Yes	7.29387e-13	12.137
P54819	KAD2_HUMAN	Adenylate kinase 2, mitochondrial	0.716962	0.11191	82	2	Yes	7.0168e-37	36.1539
Q9P0L0	VAPA_HUMAN	Vesicle-associated membrane protein-associated protein A	0.716745	0.430253	15	2	No	0.0242034	1.61612
O94826	TOM70_HUMAN	Mitochondrial import receptor subunit TOM70	0.715353	0.160528	63	2	Yes	8.05695e-21	20.0938
P08559	ODPA_HUMAN	Pyruvate dehydrogenase E1 component subunit alpha, somatic form, mitochondrial	0.71412	0.111506	28	2	Yes	2.63868e-13	12.5786
P27449	VATL_HUMAN	V-type proton ATPase 16 kDa proteolipid subunit	0.713196	0.264969	3	1	n/a	0.201664	0.695371
O95573	ACSL3_HUMAN	Long-chain-fatty-acid--CoA ligase 3	0.713141	0.119233	83	2	Yes	8.44991e-36	35.0731
P11177	ODPB_HUMAN	Pyruvate dehydrogenase E1 component subunit beta, mitochondrial	0.712711	0.0924166	54	2	Yes	8.89918e-29	28.0506
P35613	BASI_HUMAN	Basigin	0.712042	0.114644	56	2	Yes	2.34608e-25	24.6297
O76014	KRT37_HUMAN	Keratin, type I cuticular Ha7	0.711655	0.030817	4	1	n/a	0.000333095	3.47743
Q14525	KT33B_HUMAN	Keratin, type I cuticular Ha3-II	0.711655	0.030817	4	1	n/a	0.000333095	3.47743
Q15323	K1H1_HUMAN	Keratin, type I cuticular Ha1	0.711655	0.030817	4	1	n/a	0.000333095	3.47743
Q2M2I5	K1C24_HUMAN	Keratin, type I cytoskeletal 24	0.711655	0.030817	4	1	n/a	0.000333095	3.47743
P30049	ATPD_HUMAN	ATP synthase subunit delta, mitochondrial	0.708504	0.0833052	29	2	Yes	4.58581e-17	16.3386
Q13733	AT1A4_HUMAN	Sodium/potassium-transporting ATPase subunit alpha-4	0.707576	0.204422	25	2	Yes	2.77044e-07	6.55745
Q92804	RBP56_HUMAN	TATA-binding protein-associated factor 2N	0.707071	0.117652	53	2	Yes	7.04389e-24	23.1522
Q04837	SSBP_HUMAN	Single-stranded DNA-binding protein, mitochondrial	0.706666	0.153372	94	2	Yes	7.83785e-33	32.1058
O76015	KRT38_HUMAN	Keratin, type I cuticular Ha8	0.705926	0.0296029	5	1	n/a	2.43153e-05	4.61412
Q14532	K1H2_HUMAN	Keratin, type I cuticular Ha2	0.705926	0.0296029	5	1	n/a	2.43153e-05	4.61412
Q93084	AT2A3_HUMAN	Sarcoplasmic/endoplasmic reticulum calcium ATPase 3	0.705662	0.250205	39	2	No	9.83782e-09	8.0071
Q9NS69	TOM22_HUMAN	Mitochondrial import receptor subunit TOM22 homolog	0.703736	0.212863	37	2	Yes	5.46719e-10	9.26224
P05787	K2C8_HUMAN	Keratin, type II cytoskeletal 8	0.702637	0.230387	240	2	Yes	7.35461e-53	52.1334
Q9Y2Q3	GSTK1_HUMAN	Glutathione S-transferase kappa 1	0.701088	0.0797934	7	1	n/a	6.09413e-05	4.21509
Q16695	H31T_HUMAN	Histone H3.1t	0.699931	0.113179	25	2	Yes	2.95535e-12	11.5294
P37108	SRP14_HUMAN	Signal recognition particle 14 kDa protein	0.699466	0.0404792	18	2	Yes	7.95782e-16	15.0992
P62805	H4_HUMAN	Histone H4	0.697953	0.0733705	143	2	Yes	1.05672e-90	89.976
Q07666	KHDR1_HUMAN	KH domain-containing, RNA-binding, signal transduction-associated protein 1	0.693359	0.107222	48	2	Yes	3.69296e-24	23.4326
Q6KB66	K2C80_HUMAN	Keratin, type II cytoskeletal 80	0.690712	0.132416	17	2	Yes	8.18206e-08	7.08714
P20700	LMNB1_HUMAN	Lamin-B1	0.681577	0.160839	189	2	Yes	5.95707e-67	66.225
P56381	ATP5E_HUMAN	ATP synthase subunit epsilon, mitochondrial	0.681573	0.172722	4	1	n/a	0.0345846	1.46112
Q5VTU8	AT5EL_HUMAN	ATP synthase subunit epsilon-like protein, mitochondrial	0.681573	0.172722	4	1	n/a	0.0345846	1.46112
Q14103	HNRPD_HUMAN	Heterogeneous nuclear ribonucleoprotein D0	0.681392	0.118135	173	2	Yes	9.31192e-81	80.031
Q92841	DDX17_HUMAN	Probable ATP-dependent RNA helicase DDX17	0.680789	0.164373	116	2	Yes	7.91651e-41	40.1015
O75844	FACE1_HUMAN	CAAX prenyl protease 1 homolog	0.68062	0.189753	4	1	n/a	0.043531	1.3612
P18859	ATP5J_HUMAN	ATP synthase-coupling factor 6, mitochondrial	0.680416	0.107431	43	2	Yes	2.33e-22	21.6326
Q01469	FABP5_HUMAN	Fatty acid-binding protein, epidermal	0.680147	0.260296	10	1	n/a	0.0036985	2.43197
P00505	AATM_HUMAN	Aspartate aminotransferase, mitochondrial	0.676303	0.155894	122	2	Yes	1.10283e-45	44.9575
P22695	QCR2_HUMAN	Cytochrome b-c1 complex subunit 2, mitochondrial	0.675174	0.134365	138	2	Yes	4.97768e-59	58.303
P43897	EFTS_HUMAN	Elongation factor Ts, mitochondrial	0.674462	0.0613787	5	1	n/a	0.000289443	3.53844
P27105	STOM_HUMAN	Erythrocyte band 7 integral membrane protein	0.674239	0.148468	47	2	Yes	3.59846e-19	18.4439
P26599	PTBP1_HUMAN	Polypyrimidine tract-binding protein 1	0.672922	0.154543	154	2	Yes	2.27658e-58	57.6427
O43390	HNRPR_HUMAN	Heterogeneous nuclear ribonucleoprotein R	0.672425	0.173704	103	2	Yes	2.2596e-35	34.646
Q96QV6	H2A1A_HUMAN	Histone H2A type 1-A	0.671449	0.174601	97	2	Yes	2.59222e-33	32.5863
Q5JTJ3	COA6_HUMAN	Cytochrome c oxidase assembly factor 6 homolog	0.669543	0.117418	13	2	Yes	6.38667e-07	6.19473
Q9BXY0	MAK16_HUMAN	Protein MAK16 homolog	0.6689	0.0263276	3	1	n/a	0.00210093	2.67759
O43684	BUB3_HUMAN	Mitotic checkpoint protein BUB3	0.668889	0.142923	3	1	n/a	0.0568608	1.24519
P10809	CH60_HUMAN	60 kDa heat shock protein, mitochondrial	0.667645	0.165935	869	2	Yes	4.90097e-306	305.31
Q96EL3	RM53_HUMAN	39S ribosomal protein L53, mitochondrial	0.667403	0.39799	3	1	n/a	0.284727	0.545572
Q9P2R7	SUCB1_HUMAN	Succinyl-CoA ligase [ADP-forming] subunit beta, mitochondrial	0.66387	0.0413063	5	1	n/a	5.3648e-05	4.27045
Q15233	NONO_HUMAN	Non-POU domain-containing octamer-binding protein	0.663361	0.219955	89	2	Yes	8.05745e-25	24.0938
P13647	K2C5_HUMAN	Keratin, type II cytoskeletal 5	0.662887	0.180908	663	2	No	1.60027e-217	216.796
Q71DI3	H32_HUMAN	Histone H3.2	0.660617	0.159565	116	2	Yes	1.79329e-44	43.7463
Q13247	SRSF6_HUMAN	Serine/arginine-rich splicing factor 6	0.660256	0.16396	14	2	No	5.17478e-06	5.28611
P52815	RM12_HUMAN	39S ribosomal protein L12, mitochondrial	0.660087	0.141349	69	2	Yes	6.33624e-30	29.1982
P26368	U2AF2_HUMAN	Splicing factor U2AF 65 kDa subunit	0.656639	0.141471	42	2	No	1.00067e-18	17.9997
Q9Y277	VDAC3_HUMAN	Voltage-dependent anion-selective channel protein 3	0.654073	0.062639	22	2	Yes	7.37062e-17	16.1325
P09661	RU2A_HUMAN	U2 small nuclear ribonucleoprotein A'	0.653551	0.273231	22	2	Yes	8.13325e-06	5.08974
Q96A08	H2B1A_HUMAN	Histone H2B type 1-A	0.651811	0.0901414	155	2	Yes	2.94124e-94	93.5315
Q16777	H2A2C_HUMAN	Histone H2A type 2-C	0.649383	0.127044	207	2	Yes	3.29406e-98	97.4823
Q6FI13	H2A2A_HUMAN	Histone H2A type 2-A	0.649383	0.127044	207	2	Yes	3.29406e-98	97.4823
P68431	H31_HUMAN	Histone H3.1	0.649006	0.147956	94	2	Yes	6.37608e-40	39.1954
Q4VC31	CCD58_HUMAN	Coiled-coil domain-containing protein 58	0.644003	0.188423	4	1	n/a	0.0324723	1.48849
Q01546	K22O_HUMAN	Keratin, type II cytoskeletal 2 oral	0.643403	0.286892	117	2	Yes	2.43371e-25	24.6137
O60814	H2B1K_HUMAN	Histone H2B type 1-K	0.643182	0.0843694	307	2	Yes	4.44728e-197	196.352
P57053	H2BFS_HUMAN	Histone H2B type F-S	0.643182	0.0843694	307	2	Yes	4.44728e-197	196.352
P58876	H2B1D_HUMAN	Histone H2B type 1-D	0.643182	0.0843694	307	2	Yes	4.44728e-197	196.352
P62807	H2B1C_HUMAN	Histone H2B type 1-C/E/F/G/I	0.643182	0.0843694	307	2	Yes	4.44728e-197	196.352
Q5QNW6	H2B2F_HUMAN	Histone H2B type 2-F	0.643182	0.0843694	307	2	Yes	4.44728e-197	196.352
Q93079	H2B1H_HUMAN	Histone H2B type 1-H	0.643182	0.0843694	307	2	Yes	4.44728e-197	196.352
Q99877	H2B1N_HUMAN	Histone H2B type 1-N	0.643182	0.0843694	307	2	Yes	4.44728e-197	196.352
Q99879	H2B1M_HUMAN	Histone H2B type 1-M	0.643182	0.0843694	307	2	Yes	4.44728e-197	196.352
O14979	HNRDL_HUMAN	Heterogeneous nuclear ribonucleoprotein D-like	0.642988	0.136209	96	2	Yes	2.85933e-44	43.5437
P16615	AT2A2_HUMAN	Sarcoplasmic/endoplasmic reticulum calcium ATPase 2	0.642626	0.122152	78	2	Yes	2.19799e-39	38.658
O43169	CYB5B_HUMAN	Cytochrome b5 type B	0.642398	0.0974239	14	2	Yes	1.06058e-08	7.97446
O75526	RMXL2_HUMAN	RNA-binding motif protein, X-linked-like-2	0.641763	0.162174	17	2	No	1.684e-07	6.77366
P84103	SRSF3_HUMAN	Serine/arginine-rich splicing factor 3	0.640391	0.0830099	65	2	Yes	6.06108e-43	42.2174
Q99880	H2B1L_HUMAN	Histone H2B type 1-L	0.639914	0.0835521	300	2	Yes	6.39571e-195	194.194
P62304	RUXE_HUMAN	Small nuclear ribonucleoprotein E	0.639437	0.0593298	16	2	Yes	7.52527e-13	12.1235
P16401	H15_HUMAN	Histone H1.5	0.639249	0.111103	62	2	Yes	5.87707e-34	33.2308
Q8IUE6	H2A2B_HUMAN	Histone H2A type 2-B	0.63729	0.134532	121	2	Yes	8.38076e-57	56.0767
O95810	SDPR_HUMAN	Serum deprivation-response protein	0.637011	0.115204	50	2	Yes	5.8372e-27	26.2338
P31942	HNRH3_HUMAN	Heterogeneous nuclear ribonucleoprotein H3	0.635341	0.220801	46	2	No	1.80234e-14	13.7442
P09238	MMP10_HUMAN	Stromelysin-2	0.634847	0.133891	3	1	n/a	0.0420119	1.37663
P38159	RBMX_HUMAN	RNA-binding motif protein, X chromosome	0.634508	0.12398	90	2	Yes	1.46576e-45	44.8339
O76013	KRT36_HUMAN	Keratin, type I cuticular Ha6	0.634385	0.122062	6	1	n/a	0.000737799	3.13206
Q92764	KRT35_HUMAN	Keratin, type I cuticular Ha5	0.634385	0.122062	6	1	n/a	0.000737799	3.13206
P16104	H2AX_HUMAN	Histone H2AX	0.633465	0.126103	160	2	Yes	2.42987e-79	78.6144
O94925	GLSK_HUMAN	Glutaminase kidney isoform, mitochondrial	0.633463	0.111161	54	2	Yes	5.37784e-30	29.2694
P14927	QCR7_HUMAN	Cytochrome b-c1 complex subunit 7	0.63297	0.0825842	30	2	Yes	2.21357e-20	19.6549
P50213	IDH3A_HUMAN	Isocitrate dehydrogenase [NAD] subunit alpha, mitochondrial	0.632052	0.216763	12	2	No	0.000155148	3.80926
Q01085	TIAR_HUMAN	Nucleolysin TIAR	0.631524	0.177539	6	1	n/a	0.00382205	2.4177
Q9BUJ2	HNRL1_HUMAN	Heterogeneous nuclear ribonucleoprotein U-like protein 1	0.630532	0.108285	7	1	n/a	0.000103491	3.9851
O43143	DHX15_HUMAN	Pre-mRNA-splicing factor ATP-dependent RNA helicase DHX15	0.630307	0.0631127	16	2	Yes	1.24527e-12	11.9047
P08574	CY1_HUMAN	Cytochrome c1, heme protein, mitochondrial	0.630192	0.156809	15	2	No	5.09369e-07	6.29297
Q9C005	DPY30_HUMAN	Protein dpy-30 homolog	0.628745	0.225852	21	2	Yes	4.04804e-07	6.39276
Q09028	RBBP4_HUMAN	Histone-binding protein RBBP4	0.626871	0.0338813	7	1	n/a	1.08291e-07	6.96541
P84090	ERH_HUMAN	Enhancer of rudimentary homolog	0.626386	0.0995212	65	2	Yes	3.04187e-39	38.5169
P62316	SMD2_HUMAN	Small nuclear ribonucleoprotein Sm D2	0.625482	0.0504787	34	2	Yes	5.73741e-30	29.2413
Q15717	ELAV1_HUMAN	ELAV-like protein 1	0.625253	0.131959	56	2	Yes	6.73694e-28	27.1715
Q96E39	RMXL1_HUMAN	RNA binding motif protein, X-linked-like-1	0.62453	0.106737	57	2	No	4.76254e-33	32.3222
P31930	QCR1_HUMAN	Cytochrome b-c1 complex subunit 1, mitochondrial	0.622227	0.110337	176	2	Yes	2.00792e-98	97.6973
Q9Y3D6	FIS1_HUMAN	Mitochondrial fission 1 protein	0.621593	0.0359225	3	1	n/a	0.00299049	2.52426
P06899	H2B1J_HUMAN	Histone H2B type 1-J	0.621173	0.0912431	264	2	Yes	1.2825e-167	166.892
P23527	H2B1O_HUMAN	Histone H2B type 1-O	0.621173	0.0912431	264	2	Yes	1.2825e-167	166.892
P33778	H2B1B_HUMAN	Histone H2B type 1-B	0.621173	0.0912431	264	2	Yes	1.2825e-167	166.892
Q16778	H2B2E_HUMAN	Histone H2B type 2-E	0.621173	0.0912431	264	2	Yes	1.2825e-167	166.892
P12035	K2C3_HUMAN	Keratin, type II cytoskeletal 3	0.618773	0.306296	116	2	Yes	3.54895e-25	24.4499
O43837	IDH3B_HUMAN	Isocitrate dehydrogenase [NAD] subunit beta, mitochondrial	0.617093	0.150311	5	1	n/a	0.00469306	2.32854
Q8N257	H2B3B_HUMAN	Histone H2B type 3-B	0.61676	0.090142	257	2	Yes	1.09462e-165	164.961
P04908	H2A1B_HUMAN	Histone H2A type 1-B/E	0.615907	0.115939	205	2	Yes	8.39596e-112	111.076
P0C0S8	H2A1_HUMAN	Histone H2A type 1	0.615907	0.115939	205	2	Yes	8.39596e-112	111.076
P20671	H2A1D_HUMAN	Histone H2A type 1-D	0.615907	0.115939	205	2	Yes	8.39596e-112	111.076
Q7L7L0	H2A3_HUMAN	Histone H2A type 3	0.615907	0.115939	205	2	Yes	8.39596e-112	111.076
Q93077	H2A1C_HUMAN	Histone H2A type 1-C	0.615907	0.115939	205	2	Yes	8.39596e-112	111.076
Q96KK5	H2A1H_HUMAN	Histone H2A type 1-H	0.615907	0.115939	205	2	Yes	8.39596e-112	111.076
Q99878	H2A1J_HUMAN	Histone H2A type 1-J	0.615907	0.115939	205	2	Yes	8.39596e-112	111.076
Q9BTM1	H2AJ_HUMAN	Histone H2A.J	0.615907	0.115939	205	2	Yes	8.39596e-112	111.076
Q14978	NOLC1_HUMAN	Nucleolar and coiled-body phosphoprotein 1	0.615472	0.536741	15	2	No	0.0157766	1.80199
Q16576	RBBP7_HUMAN	Histone-binding protein RBBP7	0.613033	0.0269623	3	1	n/a	0.00161433	2.79201
P36957	ODO2_HUMAN	Dihydrolipoyllysine-residue succinyltransferase component of 2-oxoglutarate dehydrogenase complex, mitochondrial	0.612614	0.287028	11	1	n/a	0.00118583	2.92598
P43243	MATR3_HUMAN	Matrin-3	0.610065	0.146606	196	2	Yes	2.61633e-90	89.5823
Q9UJZ1	STML2_HUMAN	Stomatin-like protein 2, mitochondrial	0.609099	0.105128	88	2	Yes	1.5598e-52	51.8069
P24752	THIL_HUMAN	Acetyl-CoA acetyltransferase, mitochondrial	0.607246	0.115322	190	2	Yes	8.97116e-106	105.047
P08729	K2C7_HUMAN	Keratin, type II cytoskeletal 7	0.603901	0.165548	474	2	Yes	7.91811e-198	197.101
P20674	COX5A_HUMAN	Cytochrome c oxidase subunit 5A, mitochondrial	0.602613	0.106737	61	2	Yes	1.13381e-36	35.9455
O75494	SRS10_HUMAN	Serine/arginine-rich splicing factor 10	0.602409	0.141917	24	2	Yes	2.89391e-12	11.5385
Q07021	C1QBP_HUMAN	Complement component 1 Q subcomponent-binding protein, mitochondrial	0.602169	0.113907	108	2	Yes	1.31627e-61	60.8807
P31040	SDHA_HUMAN	Succinate dehydrogenase [ubiquinone] flavoprotein subunit, mitochondrial	0.601317	0.142208	88	2	Yes	6.88383e-43	42.1622
P31943	HNRH1_HUMAN	Heterogeneous nuclear ribonucleoprotein H	0.601117	0.106453	234	2	Yes	5.86335e-139	138.232
Q5XKE5	K2C79_HUMAN	Keratin, type II cytoskeletal 79	0.600544	0.211148	184	2	Yes	2.26682e-62	61.6446
P82932	RT06_HUMAN	28S ribosomal protein S6, mitochondrial	0.599733	0.0553601	12	2	Yes	2.35606e-10	9.62781
Q00839	HNRPU_HUMAN	Heterogeneous nuclear ribonucleoprotein U	0.599556	0.153755	378	2	Yes	5.37006e-170	169.27
P08579	RU2B_HUMAN	U2 small nuclear ribonucleoprotein B''	0.596185	0.0270675	4	1	n/a	8.26845e-05	4.08258
P36776	LONM_HUMAN	Lon protease homolog, mitochondrial	0.595915	0.0668768	10	1	n/a	1.35773e-08	7.86719
Q99456	K1C12_HUMAN	Keratin, type I cytoskeletal 12	0.595267	0.112076	30	2	No	5.42388e-18	17.2657
P52272	HNRPM_HUMAN	Heterogeneous nuclear ribonucleoprotein M	0.595266	0.142087	204	2	Yes	2.87354e-99	98.5416
P23246	SFPQ_HUMAN	Splicing factor, proline- and glutamine-rich	0.595221	0.17455	137	2	Yes	1.55996e-56	55.8069
P04264	K2C1_HUMAN	Keratin, type II cytoskeletal 1	0.595217	0.039146	2	1	n/a	0.0434666	1.36184
Q9NY12	GAR1_HUMAN	H/ACA ribonucleoprotein complex subunit 1	0.592752	0.125115	14	2	Yes	4.09958e-08	7.38726
P12236	ADT3_HUMAN	ADP/ATP translocase 3	0.591185	0.0883926	82	2	Yes	3.51428e-56	55.4542
O96008	TOM40_HUMAN	Mitochondrial import receptor subunit TOM40 homolog	0.589804	0.0787071	18	2	Yes	2.02566e-13	12.6934
P62314	SMD1_HUMAN	Small nuclear ribonucleoprotein Sm D1	0.589404	0.0641089	23	2	Yes	6.14288e-19	18.2116
Q86U42	PABP2_HUMAN	Polyadenylate-binding protein 2	0.587476	0.156935	3	1	n/a	0.0450091	1.3467
P13073	COX41_HUMAN	Cytochrome c oxidase subunit 4 isoform 1, mitochondrial	0.587054	0.0895416	30	2	Yes	8.20822e-21	20.0858
P53985	MOT1_HUMAN	Monocarboxylate transporter 1	0.58693	0.178139	20	2	No	5.091e-09	8.2932
P35527	K1C9_HUMAN	Keratin, type I cytoskeletal 9	0.586835	0.119091	26	2	Yes	2.84427e-15	14.546
P51648	AL3A2_HUMAN	Fatty aldehyde dehydrogenase	0.58524	0.0642126	6	1	n/a	1.83499e-05	4.73637
P12235	ADT1_HUMAN	ADP/ATP translocase 1	0.5851	0.109613	68	2	Yes	3.04641e-41	40.5162
Q9Y5B9	SP16H_HUMAN	FACT complex subunit SPT16	0.584667	0.433276	5	1	n/a	0.0987028	1.00567
P14866	HNRPL_HUMAN	Heterogeneous nuclear ribonucleoprotein L	0.583729	0.104835	307	2	Yes	3.44257e-189	188.463
P38646	GRP75_HUMAN	Stress-70 protein, mitochondrial	0.582149	0.0965306	599	2	Yes	0	#NUM!
Q7RTV0	PHF5A_HUMAN	PHD finger-like domain-containing protein 5A	0.581334	0.143355	23	2	Yes	4.00504e-12	11.3974
P61604	CH10_HUMAN	10 kDa heat shock protein, mitochondrial	0.580075	0.13374	156	2	Yes	4.79721e-82	81.319
Q07955	SRSF1_HUMAN	Serine/arginine-rich splicing factor 1	0.576673	0.133243	49	2	Yes	1.36524e-26	25.8648
P07919	QCR6_HUMAN	Cytochrome b-c1 complex subunit 6, mitochondrial	0.575182	0.0207923	15	2	Yes	7.82166e-19	18.1067
Q96EP5	DAZP1_HUMAN	DAZ-associated protein 1	0.574277	0.10531	36	2	Yes	4.8016e-23	22.3186
Q08211	DHX9_HUMAN	ATP-dependent RNA helicase A	0.571787	0.110834	165	2	Yes	2.69436e-100	99.5695
P08754	GNAI3_HUMAN	Guanine nucleotide-binding protein G(k) subunit alpha	0.570743	0.19939	9	2	Yes	0.000347445	3.45911
Q9BSJ8	ESYT1_HUMAN	Extended synaptotagmin-1	0.570547	0.152529	9	1	n/a	2.94742e-05	4.53056
Q12874	SF3A3_HUMAN	Splicing factor 3A subunit 3	0.570196	0.10765	39	2	Yes	9.83594e-25	24.0072
Q13435	SF3B2_HUMAN	Splicing factor 3B subunit 2	0.568762	0.212716	10	1	n/a	0.000123685	3.90768
P07339	CATD_HUMAN	Cathepsin D	0.566939	0.073523	125	2	Yes	9.09473e-98	97.0412
Q96A33	CCD47_HUMAN	Coiled-coil domain-containing protein 47	0.566913	0.0287176	6	1	n/a	2.73771e-07	6.56261
P55769	NH2L1_HUMAN	NHP2-like protein 1	0.564494	0.103991	67	2	Yes	2.4416e-43	42.6123
P30405	PPIF_HUMAN	Peptidyl-prolyl cis-trans isomerase F, mitochondrial	0.560935	0.0536163	29	2	Yes	1.06649e-26	25.972
P09874	PARP1_HUMAN	Poly [ADP-ribose] polymerase 1	0.560227	0.111818	126	2	Yes	1.0738e-77	76.9691
P62995	TRA2B_HUMAN	Transformer-2 protein homolog beta	0.559705	0.0806392	28	2	Yes	2.73995e-21	20.5623
P61326	MGN_HUMAN	Protein mago nashi homolog	0.559115	0.0641205	7	2	Yes	9.22482e-06	5.03504
Q96A72	MGN2_HUMAN	Protein mago nashi homolog 2	0.559115	0.0641205	7	2	Yes	9.22482e-06	5.03504
P09651	ROA1_HUMAN	Heterogeneous nuclear ribonucleoprotein A1	0.559093	0.133732	357	2	Yes	3.42482e-193	192.465
P19013	K2C4_HUMAN	Keratin, type II cytoskeletal 4	0.556717	0.175047	54	2	Yes	1.20716e-24	23.9182
P42167	LAP2B_HUMAN	Lamina-associated polypeptide 2, isoforms beta/gamma	0.556581	0.206375	41	2	Yes	1.50638e-16	15.8221
Q6DN03	H2B2C_HUMAN	Putative histone H2B type 2-C	0.55376	0.0838756	59	2	Yes	6.43729e-44	43.1913
Q6DRA6	H2B2D_HUMAN	Putative histone H2B type 2-D	0.55376	0.0838756	59	2	Yes	6.43729e-44	43.1913
Q01081	U2AF1_HUMAN	Splicing factor U2AF 35 kDa subunit	0.553086	0.048475	21	2	Yes	2.97105e-20	19.5271
P0C0S5	H2AZ_HUMAN	Histone H2A.Z	0.552025	0.143504	127	2	Yes	1.07582e-66	65.9683
Q71UI9	H2AV_HUMAN	Histone H2A.V	0.552025	0.143504	127	2	Yes	1.07582e-66	65.9683
P51991	ROA3_HUMAN	Heterogeneous nuclear ribonucleoprotein A3	0.551026	0.118925	216	2	Yes	5.35682e-129	128.271
Q14CN4	K2C72_HUMAN	Keratin, type II cytoskeletal 72	0.550762	0.0816703	96	2	Yes	1.74734e-72	71.7576
P05141	ADT2_HUMAN	ADP/ATP translocase 2	0.54822	0.118488	87	2	Yes	8.19428e-53	52.0865
P62318	SMD3_HUMAN	Small nuclear ribonucleoprotein Sm D3	0.547912	0.134002	39	2	Yes	3.35029e-22	21.4749
Q9UJS0	CMC2_HUMAN	Calcium-binding mitochondrial carrier protein Aralar2	0.547223	0.190168	10	1	n/a	3.58164e-05	4.44592
Q15029	U5S1_HUMAN	116 kDa U5 small nuclear ribonucleoprotein component	0.544603	0.120293	20	2	Yes	1.6733e-12	11.7764
Q9H0C2	ADT4_HUMAN	ADP/ATP translocase 4	0.544218	0.0432183	6	1	n/a	1.6238e-06	5.78947
P08727	K1C19_HUMAN	Keratin, type I cytoskeletal 19	0.543395	0.145104	50	2	Yes	6.18011e-27	26.209
P98179	RBM3_HUMAN	RNA-binding protein 3	0.540346	0.0942591	6	1	n/a	7.2496e-05	4.13969
Q96AG4	LRC59_HUMAN	Leucine-rich repeat-containing protein 59	0.539992	0.0693632	80	2	Yes	1.17837e-66	65.9287
P82933	RT09_HUMAN	28S ribosomal protein S9, mitochondrial	0.539446	0.0647495	5	1	n/a	9.13427e-05	4.03933
Q9UMS4	PRP19_HUMAN	Pre-mRNA-processing factor 19	0.538303	0.0620992	40	2	Yes	2.75781e-35	34.5594
Q9P0M6	H2AW_HUMAN	Core histone macro-H2A.2	0.537042	0.084618	12	2	Yes	3.62862e-09	8.44026
P22087	FBRL_HUMAN	rRNA 2'-O-methyltransferase fibrillarin	0.533816	0.0631937	40	2	Yes	3.69068e-35	34.4329
P22626	ROA2_HUMAN	Heterogeneous nuclear ribonucleoproteins A2/B1	0.53381	0.0819596	401	2	Yes	2.08943e-306	305.68
Q86V81	THOC4_HUMAN	THO complex subunit 4	0.533785	0.0877111	99	2	Yes	2.4554e-73	72.6099
Q5JTH9	RRP12_HUMAN	RRP12-like protein	0.530733	0.0178447	6	1	n/a	1.70709e-08	7.76774
Q32P51	RA1L2_HUMAN	Heterogeneous nuclear ribonucleoprotein A1-like 2	0.529956	0.0850169	181	2	Yes	1.51677e-136	135.819
O75367	H2AY_HUMAN	Core histone macro-H2A.1	0.529425	0.103202	108	2	Yes	3.61834e-73	72.4415
Q9Y2X3	NOP58_HUMAN	Nucleolar protein 58	0.528691	0.0825778	57	2	Yes	4.53279e-44	43.3436
P42704	LPPRC_HUMAN	Leucine-rich PPR motif-containing protein, mitochondrial	0.524247	0.0997328	221	2	Yes	4.78598e-153	152.32
O60488	ACSL4_HUMAN	Long-chain-fatty-acid--CoA ligase 4	0.523839	0.180512	39	2	No	1.27365e-18	17.8949
Q3SY84	K2C71_HUMAN	Keratin, type II cytoskeletal 71	0.522644	0.0793193	30	2	No	6.03231e-24	23.2195
Q12931	TRAP1_HUMAN	Heat shock protein 75 kDa, mitochondrial	0.521161	0.317266	99	2	No	4.75696e-27	26.3227
P22492	H1T_HUMAN	Histone H1t	0.52097	0.0551117	68	2	Yes	2.51539e-64	63.5994
Q02539	H11_HUMAN	Histone H1.1	0.52097	0.0551117	68	2	Yes	2.51539e-64	63.5994
P19338	NUCL_HUMAN	Nucleolin	0.519429	0.124356	328	2	Yes	1.87364e-198	197.727
P34897	GLYM_HUMAN	Serine hydroxymethyltransferase, mitochondrial	0.518582	0.112767	142	2	Yes	3.61994e-92	91.4413
P09234	RU1C_HUMAN	U1 small nuclear ribonucleoprotein C	0.517936	0.0312973	12	1	n/a	1.23443e-14	13.9085
P10412	H14_HUMAN	Histone H1.4	0.514332	0.0574256	129	2	Yes	1.92957e-120	119.715
P16402	H13_HUMAN	Histone H1.3	0.514332	0.0574256	129	2	Yes	1.92957e-120	119.715
P16403	H12_HUMAN	Histone H1.2	0.514332	0.0574256	129	2	Yes	1.92957e-120	119.715
Q7Z794	K2C1B_HUMAN	Keratin, type II cytoskeletal 1b	0.512543	0.0720837	27	2	No	8.38614e-23	22.0764
P16070	CD44_HUMAN	CD44 antigen	0.511646	0.115079	13	1	n/a	3.09668e-09	8.5091
Q7RTS7	K2C74_HUMAN	Keratin, type II cytoskeletal 74	0.508155	0.0638309	45	2	Yes	2.39953e-40	39.6199
Q86Y46	K2C73_HUMAN	Keratin, type II cytoskeletal 73	0.508155	0.0638309	45	2	Yes	2.39953e-40	39.6199
P12270	TPR_HUMAN	Nucleoprotein TPR	0.505312	0.0743485	7	1	n/a	2.1567e-06	5.66621
P52597	HNRPF_HUMAN	Heterogeneous nuclear ribonucleoprotein F	0.503968	0.0690911	104	2	Yes	5.396e-90	89.2679
P23368	MAOM_HUMAN	NAD-dependent malic enzyme, mitochondrial	0.5027	0.0984821	14	2	Yes	2.70698e-10	9.56751
O95678	K2C75_HUMAN	Keratin, type II cytoskeletal 75	0.499441	0.114781	238	2	Yes	5.57796e-156	155.254
P42166	LAP2A_HUMAN	Lamina-associated polypeptide 2, isoform alpha	0.49851	0.103769	37	2	Yes	2.91075e-26	25.536
P30837	AL1B1_HUMAN	Aldehyde dehydrogenase X, mitochondrial	0.494088	0.0655099	26	2	Yes	2.55141e-23	22.5932
P19012	K1C15_HUMAN	Keratin, type I cytoskeletal 15	0.492739	0.299358	135	2	Yes	3.08445e-41	40.5108
O60812	HNRC1_HUMAN	Heterogeneous nuclear ribonucleoprotein C-like 1	0.492285	0.0929774	125	2	Yes	7.66049e-94	93.1157
Q99729	ROAA_HUMAN	Heterogeneous nuclear ribonucleoprotein A/B	0.492026	0.113148	136	2	Yes	4.30379e-91	90.3661
P35908	K22E_HUMAN	Keratin, type II cytoskeletal 2 epidermal	0.49173	0.0619383	119	2	Yes	1.31001e-109	108.883
P17844	DDX5_HUMAN	Probable ATP-dependent RNA helicase DDX5	0.491612	0.149907	99	2	Yes	2.12159e-55	54.6733
Q9Y3B4	SF3B6_HUMAN	Splicing factor 3B subunit 6	0.487423	0.0846854	6	1	n/a	2.52484e-05	4.59777
P07910	HNRPC_HUMAN	Heterogeneous nuclear ribonucleoproteins C1/C2	0.485289	0.0893133	177	2	Yes	1.33727e-136	135.874
Q9GZT3	SLIRP_HUMAN	SRA stem-loop-interacting RNA-binding protein, mitochondrial	0.484239	0.186514	4	1	n/a	0.0116487	1.93372
Q6P2Q9	PRP8_HUMAN	Pre-mRNA-processing-splicing factor 8	0.483647	0.0861376	26	1	n/a	2.53409e-21	20.5962
Q9NYF8	BCLF1_HUMAN	Bcl-2-associated transcription factor 1	0.481679	0.0493267	3	1	n/a	0.00300527	2.52212
Q9Y5J7	TIM9_HUMAN	Mitochondrial import inner membrane translocase subunit Tim9	0.478035	0.0348105	4	1	n/a	8.14424e-05	4.08915
O00567	NOP56_HUMAN	Nucleolar protein 56	0.477482	0.0641297	25	1	n/a	1.14185e-23	22.9424
P14678	RSMB_HUMAN	Small nuclear ribonucleoprotein-associated proteins B and B'	0.476418	0.118803	20	2	Yes	1.24002e-13	12.9066
P63162	RSMN_HUMAN	Small nuclear ribonucleoprotein-associated protein N	0.476418	0.118803	20	2	Yes	1.24002e-13	12.9066
P04181	OAT_HUMAN	Ornithine aminotransferase, mitochondrial	0.474892	0.0963311	82	2	Yes	1.11478e-61	60.9528
Q14061	COX17_HUMAN	Cytochrome c oxidase copper chaperone	0.472712	0.16492	4	1	n/a	0.00774611	2.11092
Q9HAV7	GRPE1_HUMAN	GrpE protein homolog 1, mitochondrial	0.470678	0.0687224	30	2	Yes	6.88415e-27	26.1621
Q13428	TCOF_HUMAN	Treacle protein	0.4698	0.0777914	6	2	Yes	7.54225e-05	4.1225
P99999	CYC_HUMAN	Cytochrome c	0.468144	0.104412	33	2	Yes	3.81393e-24	23.4186
P04040	CATA_HUMAN	Catalase	0.467564	0.0197142	4	1	n/a	1.39759e-05	4.85462
P18754	RCC1_HUMAN	Regulator of chromosome condensation	0.457532	0.0317313	10	1	n/a	1.27477e-12	11.8946
Q04695	K1C17_HUMAN	Keratin, type I cytoskeletal 17	0.455391	0.219966	620	2	Yes	3.64316e-266	265.439
O75607	NPM3_HUMAN	Nucleoplasmin-3	0.451491	0.25833	16	2	Yes	6.77964e-07	6.16879
Q13151	ROA0_HUMAN	Heterogeneous nuclear ribonucleoprotein A0	0.44949	0.0896006	70	2	Yes	3.72695e-56	55.4286
Q16629	SRSF7_HUMAN	Serine/arginine-rich splicing factor 7	0.44822	0.0842578	14	2	Yes	1.28788e-11	10.8901
Q9BVP2	GNL3_HUMAN	Guanine nucleotide-binding protein-like 3	0.448021	0.0161038	8	1	n/a	3.27342e-12	11.485
P51659	DHB4_HUMAN	Peroxisomal multifunctional enzyme type 2	0.442271	0.0636805	26	2	Yes	1.29485e-24	23.8878
P46087	NOP2_HUMAN	Probable 28S rRNA (cytosine(4447)-C(5))-methyltransferase	0.44058	0.114424	23	2	No	1.52641e-16	15.8163
P04259	K2C6B_HUMAN	Keratin, type II cytoskeletal 6B	0.435881	0.188656	515	2	Yes	2.16714e-258	257.664
P48668	K2C6C_HUMAN	Keratin, type II cytoskeletal 6C	0.430982	0.187039	524	2	Yes	2.07239e-266	265.684
P02538	K2C6A_HUMAN	Keratin, type II cytoskeletal 6A	0.424071	0.18274	543	2	Yes	1.52961e-283	282.815
P17900	SAP3_HUMAN	Ganglioside GM2 activator	0.421859	0.100355	25	2	Yes	1.50472e-19	18.8225
Q15050	RRS1_HUMAN	Ribosome biogenesis regulatory protein homolog	0.416272	0.0728178	14	1	n/a	2.17757e-13	12.662
P06748	NPM_HUMAN	Nucleophosmin	0.409854	0.0972214	389	2	Yes	6.98258e-308	307.156
Q9Y3B2	EXOS1_HUMAN	Exosome complex component CSL4	0.400276	0.241314	3	1	n/a	0.0499588	1.30139
Q9Y5L4	TIM13_HUMAN	Mitochondrial import inner membrane translocase subunit Tim13	0.399458	0.115242	30	2	Yes	3.03607e-22	21.5177
O75533	SF3B1_HUMAN	Splicing factor 3B subunit 1	0.394758	0.116308	19	1	n/a	1.08523e-14	13.9645
P49756	RBM25_HUMAN	RNA-binding protein 25	0.38125	0.0232791	3	1	n/a	0.000471491	3.32653
O76021	RL1D1_HUMAN	Ribosomal L1 domain-containing protein 1	0.37046	0.0670171	55	2	Yes	8.47845e-54	53.0717
P53634	CATC_HUMAN	Dipeptidyl peptidase 1	0.357846	0.0471306	9	2	Yes	1.36747e-09	8.86408
Q8TDN6	BRX1_HUMAN	Ribosome biogenesis protein BRX1 homolog	0.356435	0.0677516	4	1	n/a	0.000318455	3.49695
Q9BQG0	MBB1A_HUMAN	Myb-binding protein 1A	0.35578	0.0685973	22	2	Yes	2.16282e-21	20.665
Q9BW72	HIG2A_HUMAN	HIG1 domain family member 2A, mitochondrial	0.354802	0.0105254	5	1	n/a	1.69921e-08	7.76975
P05783	K1C18_HUMAN	Keratin, type I cytoskeletal 18	0.34806	0.0573564	255	2	Yes	5.96175e-270	269.225
Q14498	RBM39_HUMAN	RNA-binding protein 39	0.347216	0.0958406	17	1	n/a	4.84212e-15	14.315
Q15287	RNPS1_HUMAN	RNA-binding protein with serine-rich domain 1	0.345253	0.0623698	8	1	n/a	1.26643e-08	7.89742
O60716	CTND1_HUMAN	Catenin delta-1	0.343783	0.058332	18	1	n/a	1.49258e-19	18.8261
P35222	CTNB1_HUMAN	Catenin beta-1	0.319886	0.204411	5	1	n/a	0.0017431	2.75868
P37268	FDFT_HUMAN	Squalene synthase	0.309867	0.0480632	6	2	Yes	3.89972e-06	5.40897
P21926	CD9_HUMAN	CD9 antigen	0.307105	0.188039	11	1	n/a	2.45974e-07	6.60911
P30519	HMOX2_HUMAN	Heme oxygenase 2	0.306892	0.0530086	12	1	n/a	7.42599e-14	13.1292
Q96EY1	DNJA3_HUMAN	DnaJ homolog subfamily A member 3, mitochondrial	0.30246	0.312963	4	1	n/a	0.0210172	1.67742
P16144	ITB4_HUMAN	Integrin beta-4	0.286154	0.236222	70	2	No	2.66284e-36	35.5747
Q96FQ6	S10AG_HUMAN	Protein S100-A16	0.28101	0.0943481	99	2	Yes	3.76439e-88	87.4243
Q6DKI1	RL7L_HUMAN	60S ribosomal protein L7-like 1	0.27395	0.0404447	3	1	n/a	0.00103275	2.986
P15924	DESP_HUMAN	Desmoplakin	0.204915	0.051806	22	1	n/a	1.25655e-26	25.9008
Q9BQ39	DDX50_HUMAN	ATP-dependent RNA helicase DDX50	0.199011	0.0618012	12	1	n/a	8.17762e-14	13.0874
P14923	PLAK_HUMAN	Junction plakoglobin	0.187137	0.0430551	18	1	n/a	2.33455e-23	22.6318
Q9Y6N5	SQRD_HUMAN	Sulfide:quinone oxidoreductase, mitochondrial	0.182374	0.0416189	13	1	n/a	4.1666e-17	16.3802
O43795	MYO1B_HUMAN	Unconventional myosin-Ib	0.174619	0.0450093	9	1	n/a	1.32223e-11	10.8787
P08195	4F2_HUMAN	4F2 cell-surface antigen heavy chain	0.17251	0.0448522	116	2	Yes	1.12123e-146	145.95
P29034	S10A2_HUMAN	Protein S100-A2	0.166039	0.0694549	7	1	n/a	6.46539e-08	7.18941
Q13751	LAMB3_HUMAN	Laminin subunit beta-3	0.166019	0.0465137	8	1	n/a	3.03571e-10	9.51774
Q9NR30	DDX21_HUMAN	Nucleolar RNA helicase 2	0.165914	0.0323429	64	2	Yes	1.11806e-89	88.9515
P12532	KCRU_HUMAN	Creatine kinase U-type, mitochondrial	0.15866	0.0309571	60	2	Yes	2.46004e-85	84.6091
Q9Y446	PKP3_HUMAN	Plakophilin-3	0.140357	0.0381684	3	1	n/a	0.000656482	3.18278
Q14134	TRI29_HUMAN	Tripartite motif-containing protein 29	0.139967	0.0630516	4	1	n/a	0.0001081	3.96617
O75629	CREG1_HUMAN	Protein CREG1	0.138714	0.038293	6	2	No	6.49804e-07	6.18722
P23229	ITA6_HUMAN	Integrin alpha-6	0.118644	0.0269105	22	1	n/a	1.58431e-33	32.8002
Q01650	LAT1_HUMAN	Large neutral amino acids transporter small subunit 1	0.11765	0.0337504	9	2	Yes	1.44163e-11	10.8411
Q9HCY8	S10AE_HUMAN	Protein S100-A14	0.0600692	0.0126541	36	2	Yes	1.26006e-65	64.8996

## Sheet: Table S2 - Palmitoylation
Supplementary Table 2. SILAC analysis of 17-ODYA enriched palmitoylated proteins with correlated abundance in Snail-transduced cells
Protein Entry (Human): Uniprot Identifier				Neg log10 p value: Negative logarithm (base 10) of p value
Uniprot Accession: Uniprot protein accession				SILAC Ratio-Unenriched: SILAC quantification ratio (Snail/Empty Vector) of MS1 and MS2 ratios
Protein Description: Protein Name				Part of Swiss-Palm? Indicates whether a protein was found in the Swiss-Palm database of palmitoylated proteins
SILAC Ratio - Palmitoylation: SILAC quantification ratio (Snail/Empty Vector) of MS1 and MS2 ratios				Uniprot AC_Mouse: Uniprot accession for corresponding palmitoylated mouse ortholog as described in Swiss Palm
Standard Deviation: Overall standard deviation				# Studies: Denotes the number of studies in which the protein was identified in either human or mouse
Quantified Events: Total number of MS1 and MS2 SILAC ratios quantified per protein				Gene names: All gene names for the associated protein
Directional Equivalence: Denotes whether the protein SILAC ratios in both directions meet the TOST test				Technique categories: denotes how the protein was identified to be palmitoylated in either human or mouse studies: ABE = Acyl Biotin Exchange, 17ODYA = metabolic incorporation of 17 octadecynoic acid in cells and enrichment followed by click chemistry
p value: one-sample, two-tailed p-value against the expected ratio of 1
			Palmitoylation Changes							Abundance Changes					SwissPalm Cross Reference
Protein Entry (Human)	Uniprot Accession	Protein Description	SILAC Ratio - Palmitoylation	Standard Deviation	Quantified events	Directions protein quantified in	Directional Equivalence?	p value	Neg log10 p value	SILAC Ratio - Unenriched	Standard Deviation	Quantified events	Directions protein quantified in	Directional Equivalence	Part of Swiss-Palm?	UniProt AC_MOUSE	Detected in Human?	Detected in Mouse?	# Human Studies protein detected in (17 Total)	# Mouse Studies protein detected in (9 total)	TOTAL studies detected in (26 total)	Gene names_HUMAN	Gene names_MOUSE	Technique categories_HUMAN	Technique categories_MOUSE
Q9HCY8	S10AE_HUMAN	Protein S100-A14	0.0268417	0.00927742	22	2	No	2.61e-42	41.5834	0.0600692	0.0126541	36	2	Yes	Yes	Q9D2Q8	Yes	No	1	0	1	S100A14, S100A15		ABE
Q9UMD9	COHA1_HUMAN	Collagen alpha-1(XVII) chain	0.0388082	0.00772451	17	2	Yes	2.98e-33	32.5253						No
Q14574	DSC3_HUMAN	Desmocollin-3	0.0396965	0.012884	11	2	No	1.48e-18	17.8309						No
P32926	DSG3_HUMAN	Desmoglein-3	0.0410426	0.0100455	5	1	n/a	2.89e-09	8.53916						No
P23229	ITA6_HUMAN	Integrin alpha-6	0.0452091	0.0258432	6	2	No	8.94e-08	7.04876	0.118644	0.0269105	22	1	n/a	Yes	Q61739	Yes	Yes	7	4	11	ITGA6	Itga6	ABE, 17ODYA	ABE, 17ODYA
P12532	KCRU_HUMAN	Creatine kinase U-type, mitochondrial	0.0457107	0.00962743	44	2	Yes	6.66e-86	85.1765	0.15866	0.0309571	60	2	Yes	Yes	P30275	No	Yes	0	1	1		Ckmt1		ABE
Q99959	PKP2_HUMAN	Plakophilin-2	0.0464633	0.0191558	37	2	Yes	2.02e-61	60.6946						No
P15924	DESP_HUMAN	Desmoplakin	0.0538931	0.0246418	164	2	Yes	4.9e-259	258.31	0.204915	0.051806	22	1	n/a	Yes	E9Q557	Yes	No	1	0	1	DSP		ABE
P22735	TGM1_HUMAN	Protein-glutamine gamma-glutamyltransferase K	0.0645645	0.0212058	18	2	No	3.71e-28	27.4306						No
Q13751	LAMB3_HUMAN	Laminin subunit beta-3	0.0756626	0.0188506	17	2	Yes	3.47e-27	26.4597	0.166019	0.0465137	8	1	n/a	No
Q9Y6N5	SQRD_HUMAN	Sulfide:quinone oxidoreductase, mitochondrial	0.0853924	0.0200344	67	2	Yes	4.95e-110	109.305	0.182374	0.0416189	13	1	n/a	Yes	Q9R112	Yes	Yes	1	1	2	SQRDL, CGI-44	Sqrdl	17ODYA	ABE
Q86X29	LSR_HUMAN	Lipolysis-stimulated lipoprotein receptor	0.0880001	0.00629398	9	1	n/a	8.78e-19	18.0564						Yes	Q99KG5	Yes	No	4	0	4	LSR, LISCH		ABE, 17ODYA
Q9Y624	JAM1_HUMAN	Junctional adhesion molecule A	0.107802	0.0327365	14	2	Yes	5.29e-19	18.2763						No
P14923	PLAK_HUMAN	Junction plakoglobin	0.111739	0.0305883	58	2	Yes	4.55e-84	83.3416	0.187137	0.0430551	18	1	n/a	Yes	Q02257	Yes	No	3	0	3	JUP, CTNNG, DP3		ABE, 17ODYA
Q96FQ6	S10AG_HUMAN	Protein S100-A16	0.113312	0.0444238	28	2	Yes	9.02e-36	35.0448	0.28101	0.0943481	99	2	Yes	Yes	-	Yes	No	1	0	1	S100A16, S100F, AAG13		17ODYA
Q04695	K1C17_HUMAN	Keratin, type I cytoskeletal 17	0.118289	0.0488187	256	2	Yes	0		0.455391	0.219966	620	2	Yes	No
P08727	K1C19_HUMAN	Keratin, type I cytoskeletal 19	0.120471	0.0395489	28	2	No	5.45e-37	36.2634	0.543395	0.145104	50	2	Yes	No
P19012	K1C15_HUMAN	Keratin, type I cytoskeletal 15	0.129117	0.0534438	60	2	No	1.76e-72	71.7533	0.492739	0.299358	135	2	Yes	No
P35527	K1C9_HUMAN	Keratin, type I cytoskeletal 9	0.129678	0.0279299	16	1	n/a	4.89e-24	23.3107	0.586835	0.119091	26	2	Yes	Yes	Q6RHW0	Yes	No	1	0	1	KRT9		17ODYA
Q99456	K1C12_HUMAN	Keratin, type I cytoskeletal 12	0.129678	0.0279299	16	1	n/a	4.89e-24	23.3107	0.595267	0.112076	30	2	No	No
P02538	K2C6A_HUMAN	Keratin, type II cytoskeletal 6A	0.13991	0.0766738	317	2	Yes	0		0.424071	0.18274	543	2	Yes	No
Q9BRX8	F213A_HUMAN	Redox-regulatory protein FAM213A	0.140484	0.0118725	7	2	Yes	7.36e-11	10.1331						Yes	Q9CYH2	Yes	Yes	1	1	2	FAM213A, C10orf58, PAMM, PRO2290, PSEC0139, UNQ611/PRO1198	Fam213a, Pamm, 5730469M10Rik	17ODYA	ABE
P48668	K2C6C_HUMAN	Keratin, type II cytoskeletal 6C	0.141095	0.0788918	334	2	Yes	0		0.430982	0.187039	524	2	Yes	No
P04259	K2C6B_HUMAN	Keratin, type II cytoskeletal 6B	0.143407	0.0802552	312	2	Yes	0		0.435881	0.188656	515	2	Yes	No
Q7RTS7	K2C74_HUMAN	Keratin, type II cytoskeletal 74	0.148604	0.0426071	35	2	No	6.02e-45	44.2201	0.508155	0.0638309	45	2	Yes	No
Q86Y46	K2C73_HUMAN	Keratin, type II cytoskeletal 73	0.148604	0.0426071	35	2	No	6.02e-45	44.2201	0.508155	0.0638309	45	2	Yes	No
Q7Z794	K2C1B_HUMAN	Keratin, type II cytoskeletal 1b	0.150372	0.0430147	27	2	No	2.39e-34	33.6218	0.512543	0.0720837	27	2	No	No
Q3SY84	K2C71_HUMAN	Keratin, type II cytoskeletal 71	0.150372	0.0430147	27	2	No	2.39e-34	33.6218	0.522644	0.0793193	30	2	No	No
P35908	K22E_HUMAN	Keratin, type II cytoskeletal 2 epidermal	0.152074	0.0754679	98	2	Yes	2.91e-103	102.537	0.49173	0.0619383	119	2	Yes	No
Q01650	LAT1_HUMAN	Large neutral amino acids transporter small subunit 1	0.155324	0.0219982	18	2	Yes	3.41e-27	26.4669	0.11765	0.0337504	9	2	Yes	Yes	Q9Z127	Yes	Yes	1	1	2	SLC7A5, CD98LC, LAT1, MPE16	Slc7a5, Lat1	17ODYA	17ODYA
Q9Y446	PKP3_HUMAN	Plakophilin-3	0.156515	0.0581403	9	2	No	8.83e-10	9.05426	0.140357	0.0381684	3	1	n/a	No
P19013	K2C4_HUMAN	Keratin, type II cytoskeletal 4	0.158116	0.0571328	40	2	Yes	1.79e-46	45.7471	0.556717	0.175047	54	2	Yes	No
O95678	K2C75_HUMAN	Keratin, type II cytoskeletal 75	0.160941	0.0883493	118	2	Yes	5.85e-116	115.233	0.499441	0.114781	238	2	Yes	No
P13647	K2C5_HUMAN	Keratin, type II cytoskeletal 5	0.162157	0.0757412	458	2	Yes	0		0.662887	0.180908	663	2	No	No
P12035	K2C3_HUMAN	Keratin, type II cytoskeletal 3	0.165869	0.0884308	89	2	Yes	3.2e-87	86.4954	0.618773	0.306296	116	2	Yes	No
O43795	MYO1B_HUMAN	Unconventional myosin-Ib	0.166808	0.0597609	107	2	Yes	1.56e-122	121.808	0.174619	0.0450093	9	1	n/a	Yes	P46735	No	Yes	0	1	1		Myo1b		ABE
P27701	CD82_HUMAN	CD82 antigen	0.167812	0.00296236	3	1	n/a	4.22e-06	5.37429						Yes	P40237	Yes	Yes	10	2	12	CD82, KAI1, SAR2, ST6, TSPAN27	Cd82, Kai1	ABE, 17ODYA	17ODYA
Q01546	K22O_HUMAN	Keratin, type II cytoskeletal 2 oral	0.173586	0.0769869	82	2	Yes	8.18e-85	84.087	0.643403	0.286892	117	2	Yes	No
P08195	4F2_HUMAN	4F2 cell-surface antigen heavy chain	0.176428	0.050118	294	2	Yes	0		0.17251	0.0448522	116	2	Yes	Yes	P10852	Yes	Yes	2	4	6	SLC3A2, MDU1	Slc3a2, Mdu1	ABE, 17ODYA	ABE, 17ODYA
Q9UBC5	MYO1A_HUMAN	Unconventional myosin-Ia	0.180042	0.0211208	7	1	n/a	5.74e-11	10.2411						No
P16144	ITB4_HUMAN	Integrin beta-4	0.18347	0.0530646	437	2	Yes	0		0.286154	0.236222	70	2	No	Yes	A2A863	Yes	No	2	0	2	ITGB4		ABE
P17301	ITA2_HUMAN	Integrin alpha-2	0.188557	0.0576124	13	2	Yes	2.12e-14	13.6732						Yes	Q62469	Yes	No	1	0	1	ITGA2, CD49B		17ODYA
Q5XKE5	K2C79_HUMAN	Keratin, type II cytoskeletal 79	0.197448	0.105437	114	2	Yes	2.06e-101	100.685	0.600544	0.211148	184	2	Yes	No
Q9NSB2	KRT84_HUMAN	Keratin, type II cuticular Hb4	0.210339	0.104854	66	2	Yes	1.65e-58	57.7812	0.832936	0.384386	79	2	Yes	No
Q14CN4	K2C72_HUMAN	Keratin, type II cytoskeletal 72	0.215919	0.116197	59	2	No	1.19e-49	48.9227	0.550762	0.0816703	96	2	Yes	No
O60437	PEPL_HUMAN	Periplakin	0.215995	0.0345925	5	1	n/a	9.07e-07	6.04226						No
Q9NX58	LYAR_HUMAN	Cell growth-regulating nucleolar protein	0.219003	0.0220432	12	2	Yes	3.16e-17	16.4999						No
P08779	K1C16_HUMAN	Keratin, type I cytoskeletal 16	0.219974	0.115353	137	2	Yes	5.29e-115	114.276	0.914025	0.37025	206	2	No	No
P05787	K2C8_HUMAN	Keratin, type II cytoskeletal 8	0.221119	0.110485	76	2	Yes	2.92e-65	64.5346	0.702637	0.230387	240	2	Yes	No
P02533	K1C14_HUMAN	Keratin, type I cytoskeletal 14	0.226453	0.0982758	377	2	No	0		0.893445	0.354554	703	2	No	No
O14684	PTGES_HUMAN	Prostaglandin E synthase	0.228994	0.0971975	3	1	n/a	0.00525581	2.27936	0.780128	0.0819935	4	1	n/a	No
P12429	ANXA3_HUMAN	Annexin A3	0.229076	0.154183	4	2	No	0.00985223	2.00647						Yes	O35639	Yes	No	1	0	1	ANXA3, ANX3		17ODYA
Q16787	LAMA3_HUMAN	Laminin subunit alpha-3	0.233923	0.403698	6	1	n/a	0.00559084	2.25252						No
P49411	EFTU_HUMAN	Elongation factor Tu, mitochondrial	0.235169	0.0132686	19	1	n/a	2.3e-33	32.6374	0.925081	0.338638	155	2	Yes	Yes	Q8BFR5	Yes	Yes	3	3	6	TUFM	Tufm	ABE, 17ODYA	ABE, 17ODYA
P08729	K2C7_HUMAN	Keratin, type II cytoskeletal 7	0.253715	0.0895187	252	2	Yes	1.8e-233	232.744	0.603901	0.165548	474	2	Yes	No
P07339	CATD_HUMAN	Cathepsin D	0.255317	0.00803376	7	2	Yes	2.14e-11	10.6698	0.566939	0.073523	125	2	Yes	Yes	P18242	Yes	No	1	0	1	CTSD, CPSD		17ODYA
P35221	CTNA1_HUMAN	Catenin alpha-1	0.261303	0.0768732	191	2	Yes	1.47e-188	187.833	0.720838	0.705439	15	2	No	Yes	P26231	Yes	Yes	3	1	4	CTNNA1	Ctnna1, Catna1	ABE, 17ODYA	17ODYA
Q8N1N4	K2C78_HUMAN	Keratin, type II cytoskeletal 78	0.263133	0.111847	36	2	Yes	5.23e-30	29.2815	0.825814	0.304919	53	2	Yes	No
Q8TCS8	PNPT1_HUMAN	Polyribonucleotide nucleotidyltransferase 1, mitochondrial	0.263428	0.111489	4	1	n/a	0.000936589	3.02845						Yes	Q8K1R3	No	Yes	0	1	1		Pnpt1, Pnpase		17ODYA
P26232	CTNA2_HUMAN	Catenin alpha-2	0.268019	0.0676523	15	2	Yes	2.94e-15	14.5316						No
O00767	ACOD_HUMAN	Acyl-CoA desaturase	0.271764	0.0746557	19	1	n/a	1.64e-19	18.7856						No
Q9UJS0	CMC2_HUMAN	Calcium-binding mitochondrial carrier protein Aralar2	0.276673	0.0603564	47	2	Yes	1.11e-50	49.9531	0.547223	0.190168	10	1	n/a	No
P24752	THIL_HUMAN	Acetyl-CoA acetyltransferase, mitochondrial	0.277224	0.0867368	30	2	Yes	7.84e-28	27.1059	0.607246	0.115322	190	2	Yes	Yes	Q8QZT1	Yes	Yes	3	4	7	ACAT1, ACAT, MAT	Acat1	ABE, 17ODYA	ABE, 17ODYA
P05783	K1C18_HUMAN	Keratin, type I cytoskeletal 18	0.282974	0.0832657	14	2	No	5.05e-13	12.297	0.34806	0.0573564	255	2	Yes	Yes	P05784	Yes	No	1	0	1	KRT18, CYK18, PIG46		17ODYA
Q15397	K0020_HUMAN	Pumilio domain-containing protein KIAA0020	0.283955	0.0551621	5	1	n/a	8.39e-06	5.07642						No
Q16666	IF16_HUMAN	Gamma-interferon-inducible protein 16	0.285507	0.0679511	60	2	Yes	1.66e-61	60.7809						No
O00483	NDUA4_HUMAN	Cytochrome c oxidase subunit NDUFA4	0.286095	0.0490633	13	2	Yes	1.49e-14	13.8282	0.733881	0.0864625	3	1	n/a	Yes	Q62425	Yes	No	1	0	1	NDUFA4		17ODYA
Q9Y221	NIP7_HUMAN	60S ribosome subunit biogenesis protein NIP7 homolog	0.286467	0.0116771	6	1	n/a	2.53e-10	9.59768						No
Q9NQ55	SSF1_HUMAN	Suppressor of SWI4 1 homolog	0.290069	0.115712	10	2	No	5.17e-08	7.28637						No
Q14126	DSG2_HUMAN	Desmoglein-2	0.300397	0.112674	314	2	Yes	1.2e-251	250.922						Yes	O55111	Yes	No	5	0	5	DSG2, CDHF5		ABE, 17ODYA
P78386	KRT85_HUMAN	Keratin, type II cuticular Hb5	0.300538	0.0985671	31	2	Yes	9.01e-27	26.0451	0.991521	0.283871	64	2	Yes	No
Q02338	BDH_HUMAN	D-beta-hydroxybutyrate dehydrogenase, mitochondrial	0.302204	0.0549875	16	2	Yes	2.83e-17	16.5488						No
Q8WVX9	FACR1_HUMAN	Fatty acyl-CoA reductase 1	0.302738	0.108927	16	2	Yes	3.69e-13	12.4327						Yes	Q922J9	No	Yes	0	1	1		Far1, Mlstd2		17ODYA
A3KMH1	VWA8_HUMAN	von Willebrand factor A domain-containing protein 8	0.303305	0.0176954	13	1	n/a	1e-20	19.9989						No
O00541	PESC_HUMAN	Pescadillo homolog	0.306513	0.189322	3	1	n/a	0.0239539	1.62062						No
Q9BXY0	MAK16_HUMAN	Protein MAK16 homolog	0.307137	0.0274884	41	2	Yes	1.02e-56	55.9907	0.6689	0.0263276	3	1	n/a	Yes	Q8BGS0	No	Yes	0	1	1		Mak16, Rbm13		17ODYA
Q9NY93	DDX56_HUMAN	Probable ATP-dependent RNA helicase DDX56	0.307731	0.131557	3	1	n/a	0.011825	1.9272						No
P14136	GFAP_HUMAN	Glial fibrillary acidic protein	0.309871	0.10039	29	2	Yes	1.12e-24	23.9526	0.885086	0.275221	53	2	Yes	No
P34897	GLYM_HUMAN	Serine hydroxymethyltransferase, mitochondrial	0.310768	0.0969711	52	2	Yes	6.88e-45	44.1625	0.518582	0.112767	142	2	Yes	Yes	-	Yes	No	3	0	3	SHMT2		17ODYA
P21912	SDHB_HUMAN	Succinate dehydrogenase [ubiquinone] iron-sulfur subunit, mitochondrial	0.311578	0.0352598	8	2	Yes	2.37e-09	8.62566						Yes	Q9CQA3	No	Yes	0	2	2		Sdhb		ABE, 17ODYA
Q07021	C1QBP_HUMAN	Complement component 1 Q subcomponent-binding protein, mitochondrial	0.314542	0.0379617	15	1	n/a	3.24e-19	18.4896	0.602169	0.113907	108	2	Yes	Yes	O35658	Yes	Yes	5	1	6	C1QBP, GC1QBP, HABP1, SF2P32	C1qbp, Gc1qbp	ABE, 17ODYA	17ODYA
O00217	NDUS8_HUMAN	NADH dehydrogenase [ubiquinone] iron-sulfur protein 8, mitochondrial	0.316606	0.0434649	3	1	n/a	0.00134566	2.87106	0.765888	0.0918411	8	2	Yes	Yes	Q8K3J1	No	Yes	0	1	1		Ndufs8		ABE
Q9NR30	DDX21_HUMAN	Nucleolar RNA helicase 2	0.316799	0.0544216	238	2	Yes	4.48e-262	261.349	0.165914	0.0323429	64	2	Yes	Yes	Q9JIK5	Yes	Yes	1	1	2	DDX21	Ddx21	17ODYA	17ODYA
P10515	ODP2_HUMAN	Dihydrolipoyllysine-residue acetyltransferase component of pyruvate dehydrogenase complex, mitochondrial	0.318279	0.0285187	29	2	Yes	3.43e-39	38.4648						Yes	Q8BMF4	Yes	Yes	2	2	4	DLAT, DLTA	Dlat	ABE, 17ODYA	ABE, 17ODYA
P30048	PRDX3_HUMAN	Thioredoxin-dependent peroxide reductase, mitochondrial	0.320431	0.0903272	20	2	Yes	1.05e-17	16.9776	0.913287	0.144123	100	2	Yes	Yes	P20108	Yes	Yes	2	1	3	PRDX3, AOP1	Prdx3, Aop1, Mer5	17ODYA	ABE
Q9H583	HEAT1_HUMAN	HEAT repeat-containing protein 1	0.326421	0.0562915	8	1	n/a	5.09e-09	8.29289						No
P31040	SDHA_HUMAN	Succinate dehydrogenase [ubiquinone] flavoprotein subunit, mitochondrial	0.327657	0.0878269	77	2	Yes	9.38e-69	68.0278	0.601317	0.142208	88	2	Yes	Yes	Q8K2B3	Yes	Yes	2	2	4	SDHA, SDH2, SDHF	Sdha	17ODYA	ABE
Q14684	RRP1B_HUMAN	Ribosomal RNA processing protein 1 homolog B	0.333474	0.0834265	7	1	n/a	7.31e-07	6.13628						No
P38646	GRP75_HUMAN	Stress-70 protein, mitochondrial	0.337556	0.0794268	302	2	Yes	9.01e-280	279.045	0.582149	0.0965306	599	2	Yes	Yes	P38647	Yes	Yes	3	2	5	HSPA9, GRP75, HSPA9B, mt-HSP70	Hspa9, Grp75, Hsp74, Hspa9a	ABE, 17ODYA	ABE, 17ODYA
P18827	SDC1_HUMAN	Syndecan-1	0.340099	0.0421686	5	1	n/a	3.98e-06	5.40011						Yes	P18828	Yes	No	1	0	1	SDC1, SDC		17ODYA
P23786	CPT2_HUMAN	Carnitine O-palmitoyltransferase 2, mitochondrial	0.340288	0.0779622	24	2	No	2.23e-22	21.6525						No
O75746	CMC1_HUMAN	Calcium-binding mitochondrial carrier protein Aralar1	0.341445	0.0738418	23	2	Yes	6.53e-22	21.185						Yes	Q8BH59	No	Yes	0	2	2		Slc25a12, Aralar1		ABE, 17ODYA
Q8NBU5	ATAD1_HUMAN	ATPase family AAA domain-containing protein 1	0.342103	0.105365	3	1	n/a	0.00844172	2.07357						No
Q9H7B2	RPF2_HUMAN	Ribosome production factor 2 homolog	0.342585	0.132705	17	2	No	2.32e-12	11.6336						No
Q9BVI4	NOC4L_HUMAN	Nucleolar complex protein 4 homolog	0.344132	0.0240654	13	2	Yes	1.51e-17	16.8198						No
Q9NV31	IMP3_HUMAN	U3 small nucleolar ribonucleoprotein protein IMP3	0.345468	0.0269647	3	1	n/a	0.000565247	3.24776						Yes	Q921Y2	No	Yes	0	1	1		Imp3		17ODYA
O76021	RL1D1_HUMAN	Ribosomal L1 domain-containing protein 1	0.345725	0.0642486	96	2	Yes	3.57e-97	96.4477	0.37046	0.0670171	55	2	Yes	Yes	Q8BVY0	Yes	No	1	0	1	RSL1D1, CATX11, CSIG, PBK1, L12		17ODYA
P11233	RALA_HUMAN	Ras-related protein Ral-A	0.34979	0.141788	6	1	n/a	9.76e-05	4.01033						Yes	P63321	Yes	Yes	5	3	8	RALA, RAL	Rala, Ral, Ral-a	ABE	ABE, 17ODYA
P00505	AATM_HUMAN	Aspartate aminotransferase, mitochondrial	0.353716	0.136707	4	1	n/a	0.00250762	2.60074	0.676303	0.155894	122	2	Yes	Yes	P05202	Yes	Yes	3	3	6	GOT2	Got2, Got-2	17ODYA	ABE, 17ODYA
Q6P1M0	S27A4_HUMAN	Long-chain fatty acid transport protein 4	0.354893	0.0815875	4	1	n/a	0.000549719	3.25986						No
Q99848	EBP2_HUMAN	Probable rRNA-processing protein EBP2	0.356184	0.0816215	14	2	No	1.43e-12	11.845						No
P09211	GSTP1_HUMAN	Glutathione S-transferase P	0.358532	0.0821391	25	1	n/a	3.11e-23	22.5067	2.31857	0.507812	185	2	Yes	Yes	P19157	Yes	Yes	3	3	6	GSTP1, FAEES3, GST3	Gstp1, Gstpib	17ODYA	ABE, 17ODYA
Q02218	ODO1_HUMAN	2-oxoglutarate dehydrogenase, mitochondrial	0.361075	0.0804307	86	2	Yes	4.27e-78	77.37	0.740994	0.129879	63	2	Yes	Yes	Q60597	Yes	Yes	3	3	6	OGDH	Ogdh, Kiaa4192	ABE, 17ODYA	ABE, 17ODYA
P07954	FUMH_HUMAN	Fumarate hydratase, mitochondrial	0.361484	0.128025	38	2	Yes	1.95e-27	26.7099	0.898809	0.119442	301	2	Yes	Yes	P97807	Yes	Yes	1	3	4	FH	Fh, Fh1	17ODYA	ABE, 17ODYA
P10809	CH60_HUMAN	60 kDa heat shock protein, mitochondrial	0.36233	0.101945	299	2	Yes	1.38e-240	239.859	0.667645	0.165935	869	2	Yes	Yes	P63038	Yes	Yes	4	3	7	HSPD1, HSP60	Hspd1, Hsp60	ABE, 17ODYA	ABE, 17ODYA
O75369	FLNB_HUMAN	Filamin-B	0.362701	0.107992	492	2	Yes	0		0.885148	0.260664	572	2	Yes	Yes	Q80X90	Yes	No	3	0	3	FLNB, FLN1L, FLN3, TABP, TAP		ABE, 17ODYA
P20674	COX5A_HUMAN	Cytochrome c oxidase subunit 5A, mitochondrial	0.364078	0.13242	9	2	No	1.85e-06	5.73306	0.602613	0.106737	61	2	Yes	Yes	P12787	Yes	No	1	0	1	COX5A		17ODYA
Q13601	KRR1_HUMAN	KRR1 small subunit processome component homolog	0.365481	0.0240494	5	1	n/a	4.94e-07	6.30598						No
Q9GZL7	WDR12_HUMAN	Ribosome biogenesis protein WDR12	0.365876	0.0456824	25	2	Yes	3.17e-28	27.4987						No
P08559	ODPA_HUMAN	Pyruvate dehydrogenase E1 component subunit alpha, somatic form, mitochondrial	0.366186	0.12819	17	2	No	2.39e-12	11.6213	0.71412	0.111506	28	2	Yes	Yes	P35486	Yes	Yes	4	2	6	PDHA1, PHE1A	Pdha1, Pdha-1	ABE, 17ODYA	ABE
P34896	GLYC_HUMAN	Serine hydroxymethyltransferase, cytosolic	0.366331	0.00938919	6	1	n/a	1.54e-10	9.81342						No
P00403	COX2_HUMAN	Cytochrome c oxidase subunit 2	0.366432	0.0955717	67	2	Yes	7.37e-56	55.1327	0.807153	0.126527	27	2	Yes	Yes	P00405	Yes	No	2	0	2	MT-CO2, COII, COXII, MTCO2		17ODYA
O00566	MPP10_HUMAN	U3 small nucleolar ribonucleoprotein protein MPP10	0.366865	0.0373661	3	1	n/a	0.00115901	2.93591						No
Q15269	PWP2_HUMAN	Periodic tryptophan protein 2 homolog	0.368173	0.0509503	22	2	Yes	8.68e-24	23.0614						No
Q13084	RM28_HUMAN	39S ribosomal protein L28, mitochondrial	0.368674	0.0221217	7	1	n/a	3.63e-10	9.4398						No
Q99714	HCD2_HUMAN	3-hydroxyacyl-CoA dehydrogenase type-2	0.369269	0.0841557	26	2	Yes	5.18e-23	22.2858	0.792281	0.239324	118	2	Yes	Yes	O08756	Yes	Yes	4	1	5	SDR5C1, HSD17B10, ERAB, HADH2, MRPP2, SCHAD, XH98G2	Hsd17b10, Erab, Hadh2	ABE, 17ODYA	17ODYA
Q9H307	PININ_HUMAN	Pinin	0.370123	0.0760096	18	2	Yes	1.4e-16	15.8525						Yes	O35691	Yes	No	1	0	1	PNN, DRS, MEMA		17ODYA
O75367	H2AY_HUMAN	Core histone macro-H2A.1	0.370157	0.0986703	78	2	Yes	9.18e-64	63.0371	0.529425	0.103202	108	2	Yes	Yes	Q9QZQ8	Yes	No	1	0	1	H2AFY, MACROH2A1		17ODYA
O60716	CTND1_HUMAN	Catenin delta-1	0.372974	0.104788	161	2	Yes	7.88e-127	126.104	0.343783	0.058332	18	1	n/a	Yes	P30999	Yes	Yes	4	3	7	CTNND1, KIAA0384	Ctnnd1, Catns, Kiaa0384	ABE, 17ODYA	ABE, 17ODYA
O76041	NEBL_HUMAN	Nebulette	0.373526	0.00905164	3	1	n/a	6.96e-05	4.15752						No
Q9UBX3	DIC_HUMAN	Mitochondrial dicarboxylate carrier	0.374276	0.0215263	7	1	n/a	3.25e-10	9.48763						Yes	Q9QZD8	Yes	Yes	1	1	2	SLC25A10, DIC	Slc25a10, Dic	17ODYA	17ODYA
P11532	DMD_HUMAN	Dystrophin	0.374943	0.0319644	7	1	n/a	3.5e-09	8.45606						No
Q6NXT2	H3C_HUMAN	Histone H3.3C	0.375189	0.178771	15	2	Yes	4.87e-09	8.31287						No
P47985	UCRI_HUMAN	Cytochrome b-c1 complex subunit Rieske, mitochondrial	0.376009	0.097225	45	2	Yes	5.38e-37	36.2694	0.770118	0.175319	20	2	Yes	Yes	Q9CR68	Yes	Yes	2	1	3	UQCRFS1	Uqcrfs1	ABE	ABE
O95716	RAB3D_HUMAN	Ras-related protein Rab-3D	0.376595	0.0599512	23	2	Yes	2.68e-23	22.5723						Yes	P35276	Yes	No	2	0	2	RAB3D, GOV, RAB16		ABE
P82921	RT21_HUMAN	28S ribosomal protein S21, mitochondrial	0.377659	0.0225635	8	1	n/a	1.5e-11	10.8249						No
Q96ER9	CCD51_HUMAN	Coiled-coil domain-containing protein 51	0.37798	0.0187801	4	1	n/a	7.58e-06	5.1203						No
P22695	QCR2_HUMAN	Cytochrome b-c1 complex subunit 2, mitochondrial	0.378471	0.103294	168	2	Yes	1.04e-132	131.983	0.675174	0.134365	138	2	Yes	Yes	Q9DB77	Yes	Yes	2	3	5	UQCRC2	Uqcrc2	17ODYA	ABE, 17ODYA
Q8TDN6	BRX1_HUMAN	Ribosome biogenesis protein BRX1 homolog	0.378539	0.106683	17	2	Yes	2.19e-13	12.6595	0.356435	0.0677516	4	1	n/a	No
P00846	ATP6_HUMAN	ATP synthase subunit a	0.380097	0.108636	7	1	n/a	5.32e-06	5.27373						No
Q9BQ39	DDX50_HUMAN	ATP-dependent RNA helicase DDX50	0.380146	0.103171	56	2	Yes	1.79e-44	43.7478	0.199011	0.0618012	12	1	n/a	No
Q15061	WDR43_HUMAN	WD repeat-containing protein 43	0.381393	0.0521209	16	2	Yes	7.18e-17	16.1441						No
Q9Y2R4	DDX52_HUMAN	Probable ATP-dependent RNA helicase DDX52	0.382307	0.098476	10	2	Yes	4.35e-08	7.3618						No
Q9NX24	NHP2_HUMAN	H/ACA ribonucleoprotein complex subunit 2	0.382963	0.0681912	12	2	Yes	2.57e-11	10.5908						Yes	Q9CRB2	Yes	No	1	0	1	NHP2, NOLA2, HSPC286, NOP5/NOP58		17ODYA
Q8TDD1	DDX54_HUMAN	ATP-dependent RNA helicase DDX54	0.383549	0.0250355	6	1	n/a	2.37e-08	7.62507						No
Q9UBK8	MTRR_HUMAN	Methionine synthase reductase	0.384095	0.0592248	7	1	n/a	1.52e-07	6.81705						No
O60313	OPA1_HUMAN	Dynamin-like 120 kDa protein, mitochondrial	0.384372	0.0827459	28	2	Yes	1.05e-24	23.9796						No
Q9BQG0	MBB1A_HUMAN	Myb-binding protein 1A	0.385	0.0829327	150	2	Yes	1.08e-131	130.965	0.35578	0.0685973	22	2	Yes	Yes	Q7TPV4	Yes	No	1	0	1	MYBBP1A, P160		17ODYA
P31930	QCR1_HUMAN	Cytochrome b-c1 complex subunit 1, mitochondrial	0.385093	0.103532	178	2	Yes	1.32e-139	138.881	0.622227	0.110337	176	2	Yes	Yes	Q9CZ13	Yes	Yes	2	2	4	UQCRC1	Uqcrc1	17ODYA	ABE
P0C7P4	UCRIL_HUMAN	Putative cytochrome b-c1 complex subunit Rieske-like protein 1	0.385422	0.095492	39	2	Yes	3.95e-32	31.4039	0.748375	0.14382	9	1	n/a	No
Q9H8H3	MET7A_HUMAN	Methyltransferase-like protein 7A	0.385984	0.107932	44	2	Yes	4.93e-34	33.3068	1.13614	0.285294	36	2	Yes	No
Q12788	TBL3_HUMAN	Transducin beta-like protein 3	0.386133	0.0473996	29	2	Yes	5.01e-32	31.3001						No
P48047	ATPO_HUMAN	ATP synthase subunit O, mitochondrial	0.387759	0.167645	43	2	Yes	1.01e-25	24.9954	0.745273	0.167108	116	2	Yes	Yes	Q9DB20	Yes	Yes	3	4	7	ATP5O, ATPO	Atp5o, D12Wsu28e	17ODYA	ABE, 17ODYA
P51398	RT29_HUMAN	28S ribosomal protein S29, mitochondrial	0.388513	0.151661	3	1	n/a	0.0198949	1.70126						Yes	Q9ER88	No	Yes	0	1	1		Dap3, Mrps29		17ODYA
P35222	CTNB1_HUMAN	Catenin beta-1	0.389166	0.106335	60	2	Yes	1.58e-46	45.8025	0.319886	0.204411	5	1	n/a	Yes	Q02248	Yes	No	3	0	3	CTNNB1, CTNNB, OK/SW-cl.35, PRO2286		ABE, 17ODYA
Q96HS1	PGAM5_HUMAN	Serine/threonine-protein phosphatase PGAM5, mitochondrial	0.389645	0.0427659	3	1	n/a	0.00163247	2.78716						Yes	Q8BX10	Yes	No	1	0	1	PGAM5		ABE
Q14573	ITPR3_HUMAN	Inositol 1,4,5-trisphosphate receptor type 3	0.390169	0.0881573	42	2	Yes	8.11e-36	35.0907						No
Q8WTT2	NOC3L_HUMAN	Nucleolar complex protein 3 homolog	0.39035	0.0598059	36	2	Yes	2.3e-36	35.6374						No
Q9UM54	MYO6_HUMAN	Unconventional myosin-VI	0.39076	0.039919	4	1	n/a	7.72e-05	4.11212						No
P40926	MDHM_HUMAN	Malate dehydrogenase, mitochondrial	0.394481	0.0569049	41	2	Yes	3.62e-42	41.4412	0.765627	0.126084	375	2	Yes	Yes	P08249	Yes	Yes	3	3	6	MDH2	Mdh2, Mor1	ABE, 17ODYA	ABE, 17ODYA
Q9H0S4	DDX47_HUMAN	Probable ATP-dependent RNA helicase DDX47	0.396506	0.0827914	5	2	No	0.000502457	3.2989						No
P19367	HXK1_HUMAN	Hexokinase-1	0.396568	0.0939667	215	2	Yes	1.52e-175	174.818	1.08276	0.1876	92	2	Yes	Yes	P17710	Yes	Yes	1	3	4	HK1	Hk1	17ODYA	ABE, 17ODYA
O95470	SGPL1_HUMAN	Sphingosine-1-phosphate lyase 1	0.396976	0.0379208	19	2	Yes	2.71e-22	21.5674						Yes	Q8R0X7	No	Yes	0	1	1		Sgpl1		17ODYA
O60832	DKC1_HUMAN	H/ACA ribonucleoprotein complex subunit 4	0.398	0.0706405	36	2	Yes	9.55e-34	33.0202						No
Q9UKV3	ACINU_HUMAN	Apoptotic chromatin condensation inducer in the nucleus	0.39806	0.0827135	28	2	Yes	1.84e-24	23.7342						No
Q03701	CEBPZ_HUMAN	CCAAT/enhancer-binding protein zeta	0.400245	0.0922157	49	2	Yes	1.57e-40	39.8048						No
Q9BRJ2	RM45_HUMAN	39S ribosomal protein L45, mitochondrial	0.402323	0.00894276	4	2	No	5.6e-05	4.25209						No
Q7Z3Y7	K1C28_HUMAN	Keratin, type I cytoskeletal 28	0.402645	0.104877	6	1	n/a	3.4e-05	4.46845	0.813944	0.341987	11	2	No	No
Q7Z3Y8	K1C27_HUMAN	Keratin, type I cytoskeletal 27	0.402645	0.104877	6	1	n/a	3.4e-05	4.46845	1.37649	0.00911029	2	1	n/a	No
Q7Z3Y9	K1C26_HUMAN	Keratin, type I cytoskeletal 26	0.402645	0.104877	6	1	n/a	3.4e-05	4.46845						No
Q7Z3Z0	K1C25_HUMAN	Keratin, type I cytoskeletal 25	0.402645	0.104877	6	1	n/a	3.4e-05	4.46845						No
Q16134	ETFD_HUMAN	Electron transfer flavoprotein-ubiquinone oxidoreductase, mitochondrial	0.403036	0.0842628	10	2	No	1.67e-08	7.77801						Yes	Q921G7	No	Yes	0	2	2		Etfdh		ABE, 17ODYA
O95299	NDUAA_HUMAN	NADH dehydrogenase [ubiquinone] 1 alpha subcomplex subunit 10, mitochondrial	0.403089	0.0658958	32	2	Yes	9.04e-31	30.0439						No
P18754	RCC1_HUMAN	Regulator of chromosome condensation	0.404163	0.120025	33	2	Yes	8.24e-24	23.0838	0.457532	0.0317313	10	1	n/a	No
P78406	RAE1L_HUMAN	mRNA export factor	0.4044	0.00681273	4	1	n/a	4.13e-07	6.38457						No
Q9NVP1	DDX18_HUMAN	ATP-dependent RNA helicase DDX18	0.404449	0.0863254	39	2	Yes	3.18e-33	32.4974	1.84066	0.338886	3	1	n/a	No
Q9C0J8	WDR33_HUMAN	pre-mRNA 3' end processing protein WDR33	0.404616	0.0906147	3	1	n/a	0.00763286	2.11731						No
Q5JTH9	RRP12_HUMAN	RRP12-like protein	0.404985	0.100747	54	2	Yes	1.61e-42	41.7935	0.530733	0.0178447	6	1	n/a	Yes	Q6P5B0	Yes	No	2	0	2	RRP12, KIAA0690		17ODYA
P51648	AL3A2_HUMAN	Fatty aldehyde dehydrogenase	0.405891	0.0919515	105	2	Yes	3.08e-86	85.5119	0.58524	0.0642126	6	1	n/a	Yes	P47740	Yes	Yes	2	1	3	ALDH3A2, ALDH10, FALDH	Aldh3a2, Ahd-3, Ahd3, Aldh3, Aldh4	ABE, 17ODYA	ABE
Q9UKD2	MRT4_HUMAN	mRNA turnover protein 4 homolog	0.409162	0.0017	6	2	Yes	1.14e-11	10.9422						No
P11177	ODPB_HUMAN	Pyruvate dehydrogenase E1 component subunit beta, mitochondrial	0.409654	0.129314	39	2	Yes	8.78e-27	26.0567	0.712711	0.0924166	54	2	Yes	Yes	Q9D051	Yes	Yes	2	3	5	PDHB, PHE1B	Pdhb	17ODYA	ABE, 17ODYA
Q9UPN3	MACF1_HUMAN	Microtubule-actin cross-linking factor 1, isoforms 1/2/3/5	0.411028	0.0531759	4	1	n/a	0.000201403	3.69593						Yes	Q9QXZ0	Yes	No	1	0	1	MACF1, ABP620, ACF7, KIAA0465, KIAA1251		ABE
P09622	DLDH_HUMAN	Dihydrolipoyl dehydrogenase, mitochondrial	0.413263	0.0946357	33	2	Yes	1.02e-26	25.9898	0.923542	0.160303	78	2	Yes	Yes	O08749	Yes	Yes	1	2	3	DLD, GCSL, LAD, PHE3	Dld	17ODYA	ABE
Q9NW13	RBM28_HUMAN	RNA-binding protein 28	0.413577	0.119269	21	1	n/a	1.1e-15	14.9598						No
Q16563	SYPL1_HUMAN	Synaptophysin-like protein 1	0.414368	0.0806437	7	1	n/a	1.29e-06	5.8907						Yes	O09117	Yes	No	1	0	1	SYPL1, SYPL		17ODYA
Q8IWA0	WDR75_HUMAN	WD repeat-containing protein 75	0.414788	0.0822002	14	2	Yes	4.81e-12	11.3182						No
O43615	TIM44_HUMAN	Mitochondrial import inner membrane translocase subunit TIM44	0.414974	0.0253578	15	1	n/a	1.06e-20	19.9765						Yes	O35857	No	Yes	0	1	1		Timm44, Mimt44, Tim44		17ODYA
Q14137	BOP1_HUMAN	Ribosome biogenesis protein BOP1	0.416532	0.107332	54	2	Yes	1.06e-40	39.9746	1.22731	1.54054	6	2	No	No
P22087	FBRL_HUMAN	rRNA 2'-O-methyltransferase fibrillarin	0.417157	0.107486	55	2	Yes	2.16e-41	40.6656	0.533816	0.0631937	40	2	Yes	No
Q14690	RRP5_HUMAN	Protein RRP5 homolog	0.41803	0.0894472	66	2	Yes	1.61e-54	53.7939						No
Q8IYB3	SRRM1_HUMAN	Serine/arginine repetitive matrix protein 1	0.418218	0.143338	34	2	Yes	7.61e-22	21.1188						Yes	Q52KI8	Yes	No	1	0	1	SRRM1, SRM160		17ODYA
Q9Y6M9	NDUB9_HUMAN	NADH dehydrogenase [ubiquinone] 1 beta subcomplex subunit 9	0.418841	0.0147612	6	1	n/a	2.27e-09	8.64344						No
O96008	TOM40_HUMAN	Mitochondrial import receptor subunit TOM40 homolog	0.423296	0.0793718	62	2	Yes	4.72e-54	53.3262	0.589804	0.0787071	18	2	Yes	Yes	Q9QYA2	Yes	Yes	4	1	5	TOMM40, C19orf1, PEREC1, TOM40	Tomm40, Mom35, Tom40	ABE, 17ODYA	17ODYA
Q9H8H0	NOL11_HUMAN	Nucleolar protein 11	0.423325	0.0233397	4	1	n/a	1.82e-05	4.73876						No
P52790	HXK3_HUMAN	Hexokinase-3	0.423449	0.0115237	6	1	n/a	6.86e-10	9.16362						No
P36542	ATPG_HUMAN	ATP synthase subunit gamma, mitochondrial	0.423661	0.0855941	42	2	Yes	2.34e-35	34.6312	0.724664	0.146678	52	2	Yes	Yes	Q91VR2	Yes	Yes	4	2	6	ATP5C1, ATP5C, ATP5CL1	Atp5c1	ABE, 17ODYA	17ODYA
P40939	ECHA_HUMAN	Trifunctional enzyme subunit alpha, mitochondrial	0.423854	0.11345	629	2	Yes	0		0.817313	0.162202	294	2	Yes	Yes	Q8BMS1	Yes	Yes	3	2	5	HADHA, HADH	Hadha	17ODYA	ABE
Q9UJZ1	STML2_HUMAN	Stomatin-like protein 2, mitochondrial	0.424503	0.138482	95	2	Yes	7.09e-61	60.1492	0.609099	0.105128	88	2	Yes	Yes	Q99JB2	Yes	No	3	0	3	STOML2, SLP2, HSPC108		ABE, 17ODYA
Q99575	POP1_HUMAN	Ribonucleases P/MRP protein subunit POP1	0.425311	0.130669	4	1	n/a	0.00309566	2.50925						No
Q92552	RT27_HUMAN	28S ribosomal protein S27, mitochondrial	0.426046	0.0912813	22	2	Yes	5.86e-18	17.2321						Yes	Q8BK72	Yes	No	1	0	1	MRPS27, KIAA0264		17ODYA
Q15287	RNPS1_HUMAN	RNA-binding protein with serine-rich domain 1	0.427812	0.132114	43	2	Yes	1.37e-28	27.8625	0.345253	0.0623698	8	1	n/a	No
P20336	RAB3A_HUMAN	Ras-related protein Rab-3A	0.42809	0.0977159	6	1	n/a	2.98e-05	4.52627						Yes	P63011	Yes	No	2	0	2	RAB3A		ABE
O00567	NOP56_HUMAN	Nucleolar protein 56	0.4296	0.101139	80	2	Yes	2.65e-61	60.5775	0.477482	0.0641297	25	1	n/a	Yes	Q9D6Z1	Yes	No	1	0	1	NOP56, NOL5A		17ODYA
P05141	ADT2_HUMAN	ADP/ATP translocase 2	0.430338	0.113706	141	2	Yes	9.27e-101	100.033	0.54822	0.118488	87	2	Yes	Yes	P51881	Yes	Yes	4	5	9	SLC25A5, ANT2	Slc25a5, Ant2	ABE, 17ODYA	ABE, 17ODYA
O75306	NDUS2_HUMAN	NADH dehydrogenase [ubiquinone] iron-sulfur protein 2, mitochondrial	0.430649	0.0780126	14	2	Yes	3.58e-12	11.4456						Yes	Q91WD5	Yes	Yes	1	1	2	NDUFS2	Ndufs2	17ODYA	ABE
O95202	LETM1_HUMAN	LETM1 and EF-hand domain-containing protein 1, mitochondrial	0.4309	0.0881923	103	2	Yes	1.51e-84	83.8224	1.04745	0.292372	5	1	n/a	Yes	Q9Z2I0	Yes	Yes	3	1	4	LETM1	Letm1	17ODYA	17ODYA
P06576	ATPB_HUMAN	ATP synthase subunit beta, mitochondrial	0.431879	0.0918223	351	2	Yes	1.07e-280	279.972	0.74257	0.1287	620	2	Yes	Yes	P56480	Yes	Yes	3	2	5	ATP5B, ATPMB, ATPSB	Atp5b	ABE, 17ODYA	ABE
Q9Y2X3	NOP58_HUMAN	Nucleolar protein 58	0.433701	0.124914	116	2	Yes	2.9e-78	77.5378	0.528691	0.0825778	57	2	Yes	Yes	Q6DFW4	Yes	No	1	0	1	NOP58, NOL5, NOP5, HSPC120		17ODYA
Q9UQ35	SRRM2_HUMAN	Serine/arginine repetitive matrix protein 2	0.433966	0.101018	46	2	Yes	2.76e-35	34.5589						Yes	Q8BTI8	Yes	No	1	0	1	SRRM2, KIAA0324, SRL300, SRM300, HSPC075		17ODYA
P35613	BASI_HUMAN	Basigin	0.434141	0.0644881	42	2	Yes	6.93e-40	39.159	0.712042	0.114644	56	2	Yes	Yes	P18572	Yes	Yes	1	1	2	BSG, UNQ6505/PRO21383	Bsg	17ODYA	17ODYA
O75947	ATP5H_HUMAN	ATP synthase subunit d, mitochondrial	0.435174	0.137474	51	2	Yes	9.56e-33	32.0195	0.79456	0.126656	92	2	Yes	Yes	Q9DCX2	Yes	Yes	1	1	2	ATP5H, My032	Atp5h	17ODYA	17ODYA
Q86YQ8	CPNE8_HUMAN	Copine-8	0.435263	0.0433395	7	1	n/a	3.97e-08	7.40151						No
P46087	NOP2_HUMAN	Probable 28S rRNA (cytosine(4447)-C(5))-methyltransferase	0.435811	0.106817	72	2	Yes	2.76e-53	52.5586	0.44058	0.114424	23	2	No	No
P49756	RBM25_HUMAN	RNA-binding protein 25	0.436049	0.120056	12	2	No	1.6e-08	7.79718	0.38125	0.0232791	3	1	n/a	No
Q9P2B2	FPRP_HUMAN	Prostaglandin F2 receptor negative regulator	0.436266	0.118869	145	2	Yes	2.51e-100	99.5999						Yes	Q9WV91	Yes	Yes	3	2	5	PTGFRN, CD9P1, EWIF, FPRP, KIAA1436	Ptgfrn, Fprp	ABE	17ODYA
P55769	NH2L1_HUMAN	NHP2-like protein 1	0.43699	0.0368643	10	2	Yes	3.74e-11	10.4274	0.564494	0.103991	67	2	Yes	Yes	Q9D0T1	Yes	No	1	0	1	NHP2L1		17ODYA
P09001	RM03_HUMAN	39S ribosomal protein L3, mitochondrial	0.437477	0.094956	9	2	Yes	4.41e-07	6.35602						No
Q9Y2W1	TR150_HUMAN	Thyroid hormone receptor-associated protein 3	0.437689	0.0809393	45	2	Yes	1.91e-38	37.7189						Yes	Q569Z6	Yes	No	2	0	2	THRAP3, TRAP150		17ODYA
O75691	UTP20_HUMAN	Small subunit processome component 20 homolog	0.438175	0.238504	13	1	n/a	2.03e-06	5.69312						No
P54819	KAD2_HUMAN	Adenylate kinase 2, mitochondrial	0.440278	0.113026	41	2	Yes	1.86e-29	28.7313	0.716962	0.11191	82	2	Yes	Yes	Q9WTP6	Yes	Yes	1	3	4	AK2, ADK2	Ak2	17ODYA	ABE, 17ODYA
O95831	AIFM1_HUMAN	Apoptosis-inducing factor 1, mitochondrial	0.44037	0.0996885	113	2	Yes	3.53e-86	85.4528						Yes	Q9Z0X1	Yes	Yes	1	2	3	AIFM1, AIF, PDCD8	Aifm1, Aif, Pdcd8	17ODYA	17ODYA
P25705	ATPA_HUMAN	ATP synthase subunit alpha, mitochondrial	0.440468	0.107239	451	2	Yes	0		0.782478	0.120643	383	2	Yes	Yes	Q03265	Yes	Yes	3	4	7	ATP5A1, ATP5A, ATP5AL2, ATPM	Atp5a1	ABE, 17ODYA	ABE, 17ODYA
Q9H0A0	NAT10_HUMAN	N-acetyltransferase 10	0.44347	0.117459	148	2	Yes	2.49e-102	101.605						Yes	Q8K224	Yes	No	1	0	1	NAT10, ALP, KIAA1709		17ODYA
Q96IX5	USMG5_HUMAN	Up-regulated during skeletal muscle growth protein 5	0.445128	0.0674391	15	1	n/a	1.81e-14	13.7416						Yes	Q78IK2	Yes	No	2	0	2	USMG5, DAPIT, HCVFTP2, PD04912		17ODYA
Q92979	NEP1_HUMAN	Ribosomal RNA small subunit methyltransferase NEP1	0.447048	0.0627017	7	2	Yes	2.69e-06	5.56999						No
Q9NYF8	BCLF1_HUMAN	Bcl-2-associated transcription factor 1	0.447056	0.0957097	24	2	No	8.47e-19	18.0719	0.481679	0.0493267	3	1	n/a	Yes	Q8K019	Yes	No	1	0	1	BCLAF1, BTF, KIAA0164		17ODYA
P42704	LPPRC_HUMAN	Leucine-rich PPR motif-containing protein, mitochondrial	0.44852	0.120988	367	2	Yes	1.08e-246	245.966	0.524247	0.0997328	221	2	Yes	Yes	Q6PB66	Yes	Yes	2	1	3	LRPPRC, LRP130	Lrpprc, Lrp130	17ODYA	17ODYA
O95453	PARN_HUMAN	Poly(A)-specific ribonuclease PARN	0.448731	0.00419585	3	1	n/a	1.93e-05	4.71422						No
P08574	CY1_HUMAN	Cytochrome c1, heme protein, mitochondrial	0.448823	0.0518179	7	2	Yes	1.06e-06	5.97436	0.630192	0.156809	15	2	No	Yes	Q9D0M3	Yes	Yes	2	1	3	CYC1	Cyc1	ABE, 17ODYA	ABE
P28331	NDUS1_HUMAN	NADH-ubiquinone oxidoreductase 75 kDa subunit, mitochondrial	0.450174	0.0937522	181	2	Yes	5.39e-141	140.268	0.769651	0.172441	60	2	Yes	Yes	Q91VD9	Yes	Yes	2	2	4	NDUFS1	Ndufs1	17ODYA	ABE
P30486	1B48_HUMAN	HLA class I histocompatibility antigen, B-48 alpha chain	0.451835	0.00768775	5	1	n/a	9.28e-09	8.03235						Yes	-	Yes	No	1	0	1	HLA-B, HLAB		ABE
Q31610	1B81_HUMAN	HLA class I histocompatibility antigen, B-81 alpha chain	0.451835	0.00768775	5	1	n/a	9.28e-09	8.03235						No
Q14692	BMS1_HUMAN	Ribosome biogenesis protein BMS1 homolog	0.454076	0.0443589	18	1	n/a	3.27e-20	19.485						No
P52789	HXK2_HUMAN	Hexokinase-2	0.454239	0.112051	17	1	n/a	8.98e-13	12.0466						Yes	O08528	Yes	Yes	1	1	2	HK2	Hk2	17ODYA	ABE
Q9H9B4	SFXN1_HUMAN	Sideroflexin-1	0.454338	0.0928418	101	2	Yes	5.35e-79	78.2714	0.884238	0.271226	28	2	Yes	Yes	Q99JR1	Yes	Yes	4	1	5	SFXN1	Sfxn1, F	ABE, 17ODYA	ABE
Q9BZF1	OSBL8_HUMAN	Oxysterol-binding protein-related protein 8	0.454631	0.285315	34	2	Yes	1.5e-12	11.8251						No
Q96EY7	PTCD3_HUMAN	Pentatricopeptide repeat domain-containing protein 3, mitochondrial	0.455577	0.123969	58	2	Yes	1.07e-38	37.9715						No
Q8WXF1	PSPC1_HUMAN	Paraspeckle component 1	0.456161	0.02475	6	2	No	7.13e-07	6.14673	0.856817	0.726518	21	2	No	Yes	Q8R326	Yes	No	2	0	2	PSPC1, PSP1		ABE
Q86U06	RBM23_HUMAN	Probable RNA-binding protein 23	0.457132	0.0511987	5	1	n/a	1.88e-05	4.72666						No
P52907	CAZA1_HUMAN	F-actin-capping protein subunit alpha-1	0.457158	0.0875706	15	2	Yes	3.75e-12	11.4262	1.57053	0.382639	45	2	Yes	Yes	P47753	Yes	Yes	2	1	3	CAPZA1	Capza1, Cappa1	17ODYA	17ODYA
Q9NP92	RT30_HUMAN	28S ribosomal protein S30, mitochondrial	0.457335	0.10707	25	2	Yes	2.63e-18	17.5807						No
Q14728	MFS10_HUMAN	Major facilitator superfamily domain-containing protein 10	0.459318	0.0327495	18	2	Yes	2.45e-21	20.6106						Yes	Q9D2V8	Yes	No	1	0	1	MFSD10, TETRAN		ABE
P35659	DEK_HUMAN	Protein DEK	0.459948	0.0616417	33	2	Yes	2.71e-31	30.5669						Yes	Q7TNV0	Yes	No	1	0	1	DEK		17ODYA
P24539	AT5F1_HUMAN	ATP synthase F(0) complex subunit B1, mitochondrial	0.459988	0.0768056	69	2	Yes	3.39e-59	58.4693	0.744009	0.0878209	66	2	Yes	Yes	Q9CQQ7	Yes	No	2	0	2	ATP5F1		17ODYA
Q9BVP2	GNL3_HUMAN	Guanine nucleotide-binding protein-like 3	0.46204	0.058435	29	2	Yes	4.69e-28	27.3287	0.448021	0.0161038	8	1	n/a	No
Q9UKS6	PACN3_HUMAN	Protein kinase C and casein kinase substrate in neurons protein 3	0.462615	0.00872104	4	1	n/a	1.18e-06	5.92887						Yes	Q99JB8	Yes	Yes	3	1	4	PACSIN3	Pacsin3	ABE, 17ODYA	ABE
P56134	ATPK_HUMAN	ATP synthase subunit f, mitochondrial	0.462892	0.0689941	7	2	Yes	4.99e-06	5.30159						No
Q9H6R4	NOL6_HUMAN	Nucleolar protein 6	0.463254	0.129134	8	1	n/a	7.3e-06	5.13693						No
P36776	LONM_HUMAN	Lon protease homolog, mitochondrial	0.465446	0.0733883	9	2	Yes	1.06e-07	6.97429	0.595915	0.0668768	10	1	n/a	Yes	Q8CGK3	Yes	Yes	1	1	2	LONP1, PRSS15	Lonp1, Prss15	17ODYA	17ODYA
Q14533	KRT81_HUMAN	Keratin, type II cuticular Hb1	0.466488	0.378721	35	2	Yes	1.26e-09	8.90039	1.0351	0.276951	76	2	Yes	No
O43790	KRT86_HUMAN	Keratin, type II cuticular Hb6	0.466488	0.378721	35	2	Yes	1.26e-09	8.90039	1.04127	0.225287	64	2	Yes	No
P78385	KRT83_HUMAN	Keratin, type II cuticular Hb3	0.466488	0.378721	35	2	Yes	1.26e-09	8.90039	1.08103	0.275906	68	2	Yes	No
P17480	UBF1_HUMAN	Nucleolar transcription factor 1	0.468883	0.12045	14	2	Yes	1.3e-09	8.88537						No
P54709	AT1B3_HUMAN	Sodium/potassium-transporting ATPase subunit beta-3	0.46991	0.114717	26	1	n/a	1.37e-18	17.8626	1.23437	0.273229	12	2	Yes	Yes	P97370	Yes	Yes	1	1	2	ATP1B3	Atp1b3	17ODYA	17ODYA
Q6IAN0	DRS7B_HUMAN	Dehydrogenase/reductase SDR family member 7B	0.471594	0.202467	3	1	n/a	0.0456159	1.34088						Yes	Q99J47	No	Yes	0	1	1		Sdr32c1, Dhrs7b		17ODYA
Q96GQ7	DDX27_HUMAN	Probable ATP-dependent RNA helicase DDX27	0.472855	0.20012	20	2	No	6.79e-10	9.16803						No
P14927	QCR7_HUMAN	Cytochrome b-c1 complex subunit 7	0.472893	0.10326	3	1	n/a	0.0125518	1.90129	0.63297	0.0825842	30	2	Yes	No
O95810	SDPR_HUMAN	Serum deprivation-response protein	0.473917	0.154984	15	2	Yes	6.94e-09	8.15843	0.637011	0.115204	50	2	Yes	Yes	Q63918	No	Yes	0	1	1		Sdpr, Sdr		ABE
Q9BTT6	LRRC1_HUMAN	Leucine-rich repeat-containing protein 1	0.475973	0.0765213	17	2	Yes	2.03e-14	13.6917						Yes	Q80VQ1	Yes	Yes	5	2	7	LRRC1, LANO	Lrrc1	ABE, 17ODYA	17ODYA
O60812	HNRC1_HUMAN	Heterogeneous nuclear ribonucleoprotein C-like 1	0.476426	0.102685	47	2	Yes	2.92e-34	33.5341	0.492285	0.0929774	125	2	Yes	No
Q9Y277	VDAC3_HUMAN	Voltage-dependent anion-selective channel protein 3	0.47731	0.132073	171	2	Yes	1.44e-105	104.843	0.654073	0.062639	22	2	Yes	Yes	Q60931	Yes	Yes	4	3	7	VDAC3	Vdac3	ABE, 17ODYA	ABE, 17ODYA
P07910	HNRPC_HUMAN	Heterogeneous nuclear ribonucleoproteins C1/C2	0.479262	0.10902	124	2	Yes	2.92e-86	85.5343	0.485289	0.0893133	177	2	Yes	Yes	Q9Z204	Yes	No	2	0	2	HNRNPC, HNRPC		17ODYA
O43823	AKAP8_HUMAN	A-kinase anchor protein 8	0.480633	0.0593231	6	1	n/a	4.09e-06	5.38839						No
Q5T653	RM02_HUMAN	39S ribosomal protein L2, mitochondrial	0.483391	0.0247742	4	1	n/a	3.03e-05	4.51801						No
Q5VTL8	PR38B_HUMAN	Pre-mRNA-splicing factor 38B	0.48458	0.0743708	5	1	n/a	0.000101208	3.99479						Yes	Q80SY5	Yes	No	1	0	1	PRPF38B		17ODYA
Q53EL6	PDCD4_HUMAN	Programmed cell death protein 4	0.485827	0.0419162	7	2	No	5.22e-07	6.28248						No
P49821	NDUV1_HUMAN	NADH dehydrogenase [ubiquinone] flavoprotein 1, mitochondrial	0.486507	0.0694178	31	2	Yes	2.76e-27	26.5591	1.64393	1.60218	32	2	No	Yes	Q91YT0	No	Yes	0	3	3		Ndufv1		ABE, 17ODYA
Q99623	PHB2_HUMAN	Prohibitin-2	0.486547	0.116479	44	2	Yes	1.5e-29	28.8226	0.759444	0.15124	95	2	Yes	Yes	O35129	Yes	Yes	1	1	2	PHB2, BAP, REA	Phb2, Bap, Bcap37, Rea	17ODYA	17ODYA
P35232	PHB_HUMAN	Prohibitin	0.486846	0.0996619	89	2	Yes	8.05e-65	64.0944	0.785042	0.104637	157	2	Yes	Yes	P67778	Yes	Yes	4	3	7	PHB	Phb	ABE, 17ODYA	17ODYA
Q96S59	RANB9_HUMAN	Ran-binding protein 9	0.48749	0.0305885	4	1	n/a	5.84e-05	4.23344						No
Q8IY81	SPB1_HUMAN	pre-rRNA processing protein FTSJ3	0.491296	0.107276	96	2	Yes	1.21e-66	65.9169						No
P12235	ADT1_HUMAN	ADP/ATP translocase 1	0.492386	0.148113	92	2	Yes	6.35e-52	51.1971	0.5851	0.109613	68	2	Yes	Yes	P48962	Yes	Yes	2	4	6	SLC25A4, ANT1	Slc25a4, Anc1, Ant1	17ODYA	ABE, 17ODYA
Q9NVV4	PAPD1_HUMAN	Poly(A) RNA polymerase, mitochondrial	0.493216	0.101827	6	1	n/a	6.57e-05	4.18268						No
P62314	SMD1_HUMAN	Small nuclear ribonucleoprotein Sm D1	0.49423	0.127467	15	1	n/a	3.69e-10	9.43256	0.589404	0.0641089	23	2	Yes	No
Q9P2D3	HTR5B_HUMAN	HEAT repeat-containing protein 5B	0.49465	0.209867	4	1	n/a	0.0170538	1.76818						No
Q99798	ACON_HUMAN	Aconitate hydratase, mitochondrial	0.495096	0.356224	6	2	No	0.0255406	1.59277	0.956517	0.212799	92	2	Yes	Yes	Q99KI0	Yes	Yes	2	5	7	ACO2	Aco2	17ODYA	ABE, 17ODYA
Q14978	NOLC1_HUMAN	Nucleolar and coiled-body phosphoprotein 1	0.497307	0.162274	56	2	No	9.72e-30	29.0124	0.615472	0.536741	15	2	No	No
Q9BZE4	NOG1_HUMAN	Nucleolar GTP-binding protein 1	0.498119	0.162172	65	2	Yes	2.32e-34	33.6349						No
Q9UKA9	PTBP2_HUMAN	Polypyrimidine tract-binding protein 2	0.498433	0.101239	6	1	n/a	6.71e-05	4.17307						No
P26368	U2AF2_HUMAN	Splicing factor U2AF 65 kDa subunit	0.500465	0.230531	33	2	Yes	1.35e-13	12.8697	0.656639	0.141471	42	2	No	No
O43143	DHX15_HUMAN	Pre-mRNA-splicing factor ATP-dependent RNA helicase DHX15	0.501348	0.104242	73	2	Yes	4.48e-51	50.3491	0.630307	0.0631127	16	2	Yes	Yes	O35286	Yes	Yes	2	1	3	DHX15, DBP1, DDX15	Dhx15, Ddx15, Deah9	17ODYA	17ODYA
Q14160	SCRIB_HUMAN	Protein scribble homolog	0.502393	0.12801	39	2	Yes	2.5e-24	23.6015						Yes	Q80U72	Yes	Yes	7	4	11	SCRIB, CRIB1, KIAA0147, LAP4, SCRB1, VARTUL	Scrib, Kiaa0147, Lap4, Scrib1	ABE, 17ODYA	17ODYA
P06748	NPM_HUMAN	Nucleophosmin	0.503103	0.130916	456	2	Yes	3.76e-272	271.424	0.409854	0.0972214	389	2	Yes	Yes	Q61937	Yes	No	2	0	2	NPM1, NPM		17ODYA
Q9H0D6	XRN2_HUMAN	5'-3' exoribonuclease 2	0.503606	0.149166	36	2	Yes	2.35e-20	19.6298						No
Q16891	MIC60_HUMAN	MICOS complex subunit MIC60	0.504024	0.140066	143	2	Yes	4.64e-82	81.3332	0.815453	0.192048	42	2	Yes	Yes	Q8CAQ8	Yes	Yes	2	1	3	MIC60, IMMT, HMP, MINOS2, PIG4, PIG52	Mic60, Immt	17ODYA	ABE
Q8N684	CPSF7_HUMAN	Cleavage and polyadenylation specificity factor subunit 7	0.504122	0.123467	17	1	n/a	1.72e-11	10.7648						No
P62995	TRA2B_HUMAN	Transformer-2 protein homolog beta	0.505166	0.171075	72	2	Yes	4.1e-36	35.3874	0.559705	0.0806392	28	2	Yes	No
Q8WXA9	SREK1_HUMAN	Splicing regulatory glutamine/lysine-rich protein 1	0.505311	0.131696	9	2	Yes	9.68e-06	5.01393						No
Q6P2Q9	PRP8_HUMAN	Pre-mRNA-processing-splicing factor 8	0.505737	0.133253	221	2	Yes	2.16e-130	129.666	0.483647	0.0861376	26	1	n/a	Yes	Q99PV0	Yes	No	1	0	1	PRPF8, PRPC8		17ODYA
Q96PK6	RBM14_HUMAN	RNA-binding protein 14	0.505758	0.164699	21	2	No	2.51e-11	10.6001	0.806376	0.239102	25	2	No	No
Q9H845	ACAD9_HUMAN	Acyl-CoA dehydrogenase family member 9, mitochondrial	0.506866	0.278537	9	2	No	0.00110964	2.95482	1.16498	0.341036	8	2	No	Yes	Q8JZN5	Yes	Yes	2	1	3	ACAD9	Acad9	17ODYA	ABE
P22626	ROA2_HUMAN	Heterogeneous nuclear ribonucleoproteins A2/B1	0.508017	0.138328	275	2	Yes	2.26e-157	156.645	0.53381	0.0819596	401	2	Yes	Yes	O88569	Yes	Yes	3	1	4	HNRNPA2B1, HNRPA2B1	Hnrnpa2b1, Hnrpa2b1	ABE, 17ODYA	17ODYA
P16402	H13_HUMAN	Histone H1.3	0.511501	0.123801	59	2	No	7.64e-37	36.1172	0.514332	0.0574256	129	2	Yes	Yes	P43277	Yes	No	1	0	1	HIST1H1D, H1F3		17ODYA
P10412	H14_HUMAN	Histone H1.4	0.511501	0.123801	59	2	No	7.64e-37	36.1172	0.514332	0.0574256	129	2	Yes	Yes	P43274	Yes	No	1	0	1	HIST1H1E, H1F4		17ODYA
P16403	H12_HUMAN	Histone H1.2	0.511501	0.123801	59	2	No	7.64e-37	36.1172	0.514332	0.0574256	129	2	Yes	No
P56537	IF6_HUMAN	Eukaryotic translation initiation factor 6	0.513601	0.0985795	29	2	Yes	6.83e-21	20.1657	0.810316	0.136149	31	2	Yes	Yes	O55135	Yes	Yes	2	1	3	EIF6, EIF3A, ITGB4BP, OK/SW-cl.27	Eif6, Itgb4bp	ABE	ABE
Q9Y394	DHRS7_HUMAN	Dehydrogenase/reductase SDR family member 7	0.514024	0.205843	17	2	No	7.11e-08	7.14791						No
Q96A35	RM24_HUMAN	39S ribosomal protein L24, mitochondrial	0.515037	0.123331	6	2	No	0.000649715	3.18728						No
O94826	TOM70_HUMAN	Mitochondrial import receptor subunit TOM70	0.515828	0.12488	88	2	Yes	5.36e-54	53.2705	0.715353	0.160528	63	2	Yes	Yes	Q9CZW5	Yes	Yes	1	2	3	TOMM70A, KIAA0719, TOM70	Tomm70a, D16Wsu109e	17ODYA	ABE, 17ODYA
Q9NSE4	SYIM_HUMAN	Isoleucine--tRNA ligase, mitochondrial	0.515897	0.177166	34	2	No	9e-17	16.0459	0.970614	0.17003	163	2	Yes	Yes	Q8BIJ6	Yes	No	1	0	1	IARS2		17ODYA
Q7L014	DDX46_HUMAN	Probable ATP-dependent RNA helicase DDX46	0.518112	0.0554822	26	2	Yes	1.58e-24	23.8018						Yes	Q569Z5	Yes	No	1	0	1	DDX46, KIAA0801		17ODYA
P82933	RT09_HUMAN	28S ribosomal protein S9, mitochondrial	0.51975	0.179383	4	1	n/a	0.0127441	1.89469	0.539446	0.0647495	5	1	n/a	No
Q9H0C2	ADT4_HUMAN	ADP/ATP translocase 4	0.520853	0.0422239	17	2	Yes	1.13e-17	16.9456	0.544218	0.0432183	6	1	n/a	No
O75251	NDUS7_HUMAN	NADH dehydrogenase [ubiquinone] iron-sulfur protein 7, mitochondrial	0.521721	0.0533876	10	1	n/a	4.14e-10	9.38311	0.822454	0.0934024	4	1	n/a	Yes	Q9DC70	No	Yes	0	1	1		Ndufs7		ABE
Q6NUK1	SCMC1_HUMAN	Calcium-binding mitochondrial carrier protein SCaMC-1	0.522149	0.0601353	6	1	n/a	6.61e-06	5.18009						Yes	Q8BMD8	Yes	No	1	0	1	SLC25A24, APC1, MCSC1, SCAMC1		17ODYA
Q13151	ROA0_HUMAN	Heterogeneous nuclear ribonucleoprotein A0	0.522244	0.101816	52	2	Yes	3.98e-36	35.4002	0.44949	0.0896006	70	2	Yes	Yes	Q9CX86	Yes	No	3	0	3	HNRNPA0, HNRPA0		ABE, 17ODYA
P68431	H31_HUMAN	Histone H3.1	0.523103	0.184455	89	2	Yes	1.15e-40	39.9385	0.649006	0.147956	94	2	Yes	Yes	P68433	Yes	No	1	0	1	HIST1H3A, H3FA;, HIST1H3B, H3FL;, HIST1H3C, H3FC;, HIST1H3D, H3FB;, HIST1H3E, H3FD;, HIST1H3F, H3FI;, HIST1H3G, H3FH;, HIST1H3H, H3FK;, HIST1H3I, H3FF;, HIST1H3J, H3FJ		17ODYA
Q71DI3	H32_HUMAN	Histone H3.2	0.523103	0.184455	89	2	Yes	1.15e-40	39.9385	0.660617	0.159565	116	2	Yes	Yes	P84228	Yes	No	1	0	1	HIST2H3A;, HIST2H3C, H3F2, H3FM;, HIST2H3D		17ODYA
P84243	H33_HUMAN	Histone H3.3	0.523103	0.184455	89	2	Yes	1.15e-40	39.9385	0.722025	0.166574	104	2	Yes	Yes	P84244	Yes	No	1	0	1	H3F3A, H3.3A, H3F3, PP781;, H3F3B, H3.3B		17ODYA
Q16695	H31T_HUMAN	Histone H3.1t	0.523103	0.184455	89	2	Yes	1.15e-40	39.9385	0.699931	0.113179	25	2	Yes	No
Q07955	SRSF1_HUMAN	Serine/arginine-rich splicing factor 1	0.523567	0.10329	97	2	Yes	3.08e-66	65.5114	0.576673	0.133243	49	2	Yes	No
P31942	HNRH3_HUMAN	Heterogeneous nuclear ribonucleoprotein H3	0.526415	0.0870624	65	2	Yes	6.28e-49	48.2019	0.635341	0.220801	46	2	No	Yes	-	Yes	No	1	0	1	HNRNPH3, HNRPH3		17ODYA
P45880	VDAC2_HUMAN	Voltage-dependent anion-selective channel protein 2	0.527543	0.127749	287	2	Yes	1.09e-168	167.963	0.992213	0.183122	182	2	Yes	Yes	Q60930	Yes	Yes	3	4	7	VDAC2	Vdac2, Vdac6	ABE, 17ODYA	ABE, 17ODYA
P62318	SMD3_HUMAN	Small nuclear ribonucleoprotein Sm D3	0.528867	0.0885214	19	2	Yes	2.61e-14	13.5826	0.547912	0.134002	39	2	Yes	Yes	P62320	No	Yes	0	1	1		Snrpd3		17ODYA
P51991	ROA3_HUMAN	Heterogeneous nuclear ribonucleoprotein A3	0.529613	0.119753	176	2	Yes	4.27e-108	107.369	0.551026	0.118925	216	2	Yes	Yes	Q8BG05	Yes	Yes	3	3	6	HNRNPA3, HNRPA3	Hnrnpa3, Hnrpa3	ABE, 17ODYA	ABE, 17ODYA
P18583	SON_HUMAN	Protein SON	0.529701	0.074967	7	1	n/a	3.05e-06	5.51558						Yes	Q9QX47	Yes	No	1	0	1	SON, C21orf50, DBP5, KIAA1019, NREBP, HSPC310, HSPC312		17ODYA
Q9UNX4	WDR3_HUMAN	WD repeat-containing protein 3	0.530034	0.0378096	4	1	n/a	0.000142713	3.84554						No
Q15029	U5S1_HUMAN	116 kDa U5 small nuclear ribonucleoprotein component	0.53017	0.131091	171	2	Yes	9.19e-99	98.0369	0.544603	0.120293	20	2	Yes	Yes	O08810	Yes	Yes	2	1	3	EFTUD2, KIAA0031, SNRP116	Eftud2, Snrp116	17ODYA	17ODYA
O43678	NDUA2_HUMAN	NADH dehydrogenase [ubiquinone] 1 alpha subcomplex subunit 2	0.531779	0.178753	13	2	Yes	1.3e-06	5.8844	1.06569	0.0312023	3	1	n/a	No
Q9H078	CLPB_HUMAN	Caseinolytic peptidase B protein homolog	0.533055	0.134066	7	2	Yes	0.00025266	3.59746						No
Q9H6W3	NO66_HUMAN	Bifunctional lysine-specific demethylase and histidyl-hydroxylase NO66	0.533482	0.138335	8	1	n/a	2.92e-05	4.53481						No
Q9NRK6	ABCBA_HUMAN	ATP-binding cassette sub-family B member 10, mitochondrial	0.533979	0.0993475	8	2	No	1.13e-05	4.94568						No
P22392	NDKB_HUMAN	Nucleoside diphosphate kinase B	0.534403	0.168068	3	1	n/a	0.0407945	1.3894	2.8606	0.418476	93	2	Yes	Yes	Q01768	Yes	Yes	2	2	4	NME2, NM23B	Nme2	17ODYA	17ODYA
O60361	NDK8_HUMAN	Putative nucleoside diphosphate kinase	0.534403	0.168068	3	1	n/a	0.0407945	1.3894	2.68819	0.288397	50	2	Yes	No
Q16795	NDUA9_HUMAN	NADH dehydrogenase [ubiquinone] 1 alpha subcomplex subunit 9, mitochondrial	0.534766	0.138568	17	2	Yes	5.99e-10	9.22225						Yes	Q9DC69	Yes	Yes	1	1	2	NDUFA9, NDUFS2L	Ndufa9	17ODYA	ABE
P21796	VDAC1_HUMAN	Voltage-dependent anion-selective channel protein 1	0.53713	0.119756	343	2	Yes	1.67e-207	206.777	0.887549	0.112168	339	2	Yes	Yes	Q60932	Yes	Yes	2	4	6	VDAC1, VDAC	Vdac1, Vdac5	17ODYA	ABE, 17ODYA
Q99729	ROAA_HUMAN	Heterogeneous nuclear ribonucleoprotein A/B	0.537409	0.144018	63	2	Yes	3.14e-34	33.5028	0.492026	0.113148	136	2	Yes	Yes	Q99020	Yes	Yes	2	1	3	HNRNPAB, ABBP1, HNRPAB	Hnrnpab, Cbf-a, Cgbfa, Hnrpab	17ODYA	17ODYA
Q16629	SRSF7_HUMAN	Serine/arginine-rich splicing factor 7	0.538932	0.120942	78	2	Yes	2.01e-47	46.6961	0.44822	0.0842578	14	2	Yes	Yes	Q8BL97	Yes	No	1	0	1	SRSF7, SFRS7		17ODYA
O75400	PR40A_HUMAN	Pre-mRNA-processing factor 40 homolog A	0.540127	0.0985926	32	2	Yes	2.57e-22	21.5907						No
Q9Y6C9	MTCH2_HUMAN	Mitochondrial carrier homolog 2	0.540406	0.0547583	11	2	No	4.84e-10	9.31523	0.864098	0.154388	33	2	Yes	Yes	Q791V5	Yes	Yes	2	3	5	MTCH2, MIMP, HSPC032	Mtch2	17ODYA	ABE, 17ODYA
P52597	HNRPF_HUMAN	Heterogeneous nuclear ribonucleoprotein F	0.541077	0.111096	214	2	Yes	1.32e-135	134.88	0.503968	0.0690911	104	2	Yes	Yes	Q9Z2X1	Yes	Yes	4	2	6	HNRNPF, HNRPF	Hnrnpf, Hnrpf	ABE, 17ODYA	17ODYA
Q16531	DDB1_HUMAN	DNA damage-binding protein 1	0.541137	0.040246	12	1	n/a	3.32e-13	12.4785						Yes	Q3U1J4	Yes	Yes	2	1	3	DDB1, XAP1	Ddb1	17ODYA	ABE
P09234	RU1C_HUMAN	U1 small nuclear ribonucleoprotein C	0.542245	0.0566871	10	2	Yes	5.93e-09	8.22704	0.517936	0.0312973	12	1	n/a	No
Q9BWM7	SFXN3_HUMAN	Sideroflexin-3	0.543049	0.110505	19	2	Yes	1.63e-12	11.7889						Yes	Q91V61	Yes	Yes	1	2	3	SFXN3	Sfxn3	17ODYA	ABE
Q9BXP5	SRRT_HUMAN	Serrate RNA effector molecule homolog	0.543249	0.167007	17	2	No	1.01e-08	7.99715						Yes	Q99MR6	Yes	No	1	0	1	SRRT, ARS2, ASR2		17ODYA
Q9BZE1	RM37_HUMAN	39S ribosomal protein L37, mitochondrial	0.54329	0.0857983	8	1	n/a	1.37e-06	5.86328						No
O95292	VAPB_HUMAN	Vesicle-associated membrane protein-associated protein B/C	0.543449	0.120374	21	2	Yes	4.02e-13	12.396						Yes	Q9QY76	Yes	No	1	0	1	VAPB, UNQ484/PRO983		17ODYA
Q5SY16	NOL9_HUMAN	Polynucleotide 5'-hydroxyl-kinase NOL9	0.545869	0.158033	18	1	n/a	7.89e-10	9.10286						No
Q8TDD5	MCLN3_HUMAN	Mucolipin-3	0.546519	0.0642257	5	1	n/a	9.4e-05	4.02672						No
O75643	U520_HUMAN	U5 small nuclear ribonucleoprotein 200 kDa helicase	0.547059	0.130166	173	2	Yes	7.11e-98	97.1481						Yes	Q6P4T2	Yes	No	3	0	3	SNRNP200, ASCC3L1, HELIC2, KIAA0788		ABE, 17ODYA
P42285	SK2L2_HUMAN	Superkiller viralicidic activity 2-like 2	0.54786	0.145535	28	2	Yes	2.96e-15	14.5282						No
P09651	ROA1_HUMAN	Heterogeneous nuclear ribonucleoprotein A1	0.548034	0.192871	186	2	Yes	5.06e-77	76.2957	0.559093	0.133732	357	2	Yes	Yes	P49312	Yes	No	3	0	3	HNRNPA1, HNRPA1		ABE, 17ODYA
O94906	PRP6_HUMAN	Pre-mRNA-processing factor 6	0.548499	0.14725	24	2	No	4.77e-13	12.3211						Yes	Q91YR7	Yes	No	1	0	1	PRPF6, C20orf14		17ODYA
P20671	H2A1D_HUMAN	Histone H2A type 1-D	0.548584	0.131562	69	2	Yes	3.53e-39	38.4519	0.615907	0.115939	205	2	Yes	Yes	-	Yes	No	1	0	1	HIST1H2AD, H2AFG		17ODYA
Q6FI13	H2A2A_HUMAN	Histone H2A type 2-A	0.548584	0.131562	69	2	Yes	3.53e-39	38.4519	0.649383	0.127044	207	2	Yes	Yes	Q6GSS7	Yes	No	1	0	1	HIST2H2AA3, H2AFO, HIST2H2AA;, HIST2H2AA4		17ODYA
Q16777	H2A2C_HUMAN	Histone H2A type 2-C	0.548584	0.131562	69	2	Yes	3.53e-39	38.4519	0.649383	0.127044	207	2	Yes	Yes	Q64523	Yes	No	1	0	1	HIST2H2AC, H2AFQ		17ODYA
Q9BTM1	H2AJ_HUMAN	Histone H2A.J	0.548584	0.131562	69	2	Yes	3.53e-39	38.4519	0.615907	0.115939	205	2	Yes	Yes	Q8R1M2	No	Yes	0	1	1		H2afj		17ODYA
P04908	H2A1B_HUMAN	Histone H2A type 1-B/E	0.548584	0.131562	69	2	Yes	3.53e-39	38.4519	0.615907	0.115939	205	2	Yes	No
P0C0S8	H2A1_HUMAN	Histone H2A type 1	0.548584	0.131562	69	2	Yes	3.53e-39	38.4519	0.615907	0.115939	205	2	Yes	No
Q7L7L0	H2A3_HUMAN	Histone H2A type 3	0.548584	0.131562	69	2	Yes	3.53e-39	38.4519	0.615907	0.115939	205	2	Yes	No
Q93077	H2A1C_HUMAN	Histone H2A type 1-C	0.548584	0.131562	69	2	Yes	3.53e-39	38.4519	0.615907	0.115939	205	2	Yes	No
Q96KK5	H2A1H_HUMAN	Histone H2A type 1-H	0.548584	0.131562	69	2	Yes	3.53e-39	38.4519	0.615907	0.115939	205	2	Yes	No
Q99878	H2A1J_HUMAN	Histone H2A type 1-J	0.548584	0.131562	69	2	Yes	3.53e-39	38.4519	0.615907	0.115939	205	2	Yes	No
P00533	EGFR_HUMAN	Epidermal growth factor receptor	0.549508	0.20436	47	2	No	3.02e-19	18.5202						Yes	Q01279	Yes	Yes	1	1	2	EGFR, ERBB, ERBB1, HER1	Egfr	17ODYA	ABE
Q9Y4W6	AFG32_HUMAN	AFG3-like protein 2	0.550286	0.0957168	6	1	n/a	8.68e-05	4.06132						Yes	Q8JZQ2	Yes	No	1	0	1	AFG3L2		ABE
P14866	HNRPL_HUMAN	Heterogeneous nuclear ribonucleoprotein L	0.550816	0.131134	320	2	Yes	3.83e-178	177.417	0.583729	0.104835	307	2	Yes	Yes	Q8R081	Yes	Yes	3	1	4	HNRNPL, HNRPL, P/OKcl.14	Hnrnpl, Hnrpl	17ODYA	ABE
Q6YHK3	CD109_HUMAN	CD109 antigen	0.551289	0.132783	127	2	Yes	1.24e-70	69.9075	0.92235	0.156411	56	2	Yes	No
P49792	RBP2_HUMAN	E3 SUMO-protein ligase RanBP2	0.551311	0.122866	24	1	n/a	5.41e-15	14.2668						Yes	Q9ERU9	Yes	No	1	0	1	RANBP2, NUP358		17ODYA
Q13733	AT1A4_HUMAN	Sodium/potassium-transporting ATPase subunit alpha-4	0.552162	0.128702	108	2	Yes	1.9e-61	60.7223	0.707576	0.204422	25	2	Yes	No
Q9NYH9	UTP6_HUMAN	U3 small nucleolar RNA-associated protein 6 homolog	0.552514	0.0454783	3	1	n/a	0.00342524	2.46531						No
P01889	1B07_HUMAN	HLA class I histocompatibility antigen, B-7 alpha chain	0.552738	0.116505	12	2	Yes	1.11e-07	6.95648						Yes	-	Yes	No	8	0	8	HLA-B, HLAB		ABE, 17ODYA
P30460	1B08_HUMAN	HLA class I histocompatibility antigen, B-8 alpha chain	0.552738	0.116505	12	2	Yes	1.11e-07	6.95648						Yes	-	Yes	No	2	0	2	HLA-B, HLAB, Gag		ABE, 17ODYA
P30466	1B18_HUMAN	HLA class I histocompatibility antigen, B-18 alpha chain	0.552738	0.116505	12	2	Yes	1.11e-07	6.95648						Yes	-	Yes	No	1	0	1	HLA-B, HLAB		ABE
P30479	1B41_HUMAN	HLA class I histocompatibility antigen, B-41 alpha chain	0.552738	0.116505	12	2	Yes	1.11e-07	6.95648						Yes	-	Yes	No	1	0	1	HLA-B, HLAB		ABE
P30462	1B14_HUMAN	HLA class I histocompatibility antigen, B-14 alpha chain	0.552738	0.116505	12	2	Yes	1.11e-07	6.95648						No
P30480	1B42_HUMAN	HLA class I histocompatibility antigen, B-42 alpha chain	0.552738	0.116505	12	2	Yes	1.11e-07	6.95648						No
Q5JTV8	TOIP1_HUMAN	Torsin-1A-interacting protein 1	0.553115	0.140248	25	2	Yes	6.43e-14	13.1919						No
Q01130	SRSF2_HUMAN	Serine/arginine-rich splicing factor 2	0.553314	0.105692	29	2	Yes	3.76e-19	18.4253						No
P43304	GPDM_HUMAN	Glycerol-3-phosphate dehydrogenase, mitochondrial	0.553711	0.103517	68	2	Yes	9.12e-45	44.04	0.799667	0.249474	11	2	Yes	Yes	Q64521	Yes	Yes	1	2	3	GPD2	Gpd2, Gdm1	17ODYA	ABE
Q01780	EXOSX_HUMAN	Exosome component 10	0.554042	0.0450767	16	2	Yes	9.02e-16	15.045						No
Q1KMD3	HNRL2_HUMAN	Heterogeneous nuclear ribonucleoprotein U-like protein 2	0.55494	0.129426	51	2	Yes	3.39e-29	28.4694						No
Q13423	NNTM_HUMAN	NAD(P) transhydrogenase, mitochondrial	0.558182	0.149838	158	2	Yes	3.1e-79	78.5084						Yes	Q61941	Yes	No	3	0	3	NNT		ABE, 17ODYA
O75494	SRS10_HUMAN	Serine/arginine-rich splicing factor 10	0.558317	0.123484	56	2	Yes	7.61e-33	32.1186	0.602409	0.141917	24	2	Yes	No
O15213	WDR46_HUMAN	WD repeat-containing protein 46	0.558365	0.113529	5	1	n/a	0.000961743	3.01694						Yes	Q9Z0H1	No	Yes	0	1	1		Wdr46, Bing4		17ODYA
Q15393	SF3B3_HUMAN	Splicing factor 3B subunit 3	0.558942	0.147274	109	2	Yes	1.24e-55	54.9067						Yes	Q921M3	Yes	Yes	2	1	3	SF3B3, KIAA0017, SAP130	Sf3b3, Kiaa0017	17ODYA	17ODYA
P62805	H4_HUMAN	Histone H4	0.559021	0.165346	72	2	Yes	6.42e-34	33.1925	0.697953	0.0733705	143	2	Yes	Yes	P62806	Yes	No	3	0	3	HIST1H4A, H4/A, H4FA;, HIST1H4B, H4/I, H4FI;, HIST1H4C, H4/G, H4FG;, HIST1H4D, H4/B, H4FB;, HIST1H4E, H4/J, H4FJ;, HIST1H4F, H4/C, H4FC;, HIST1H4H, H4/H, H4FH;, HIST1H4I, H4/M, H4FM;, HIST1H4J, H4/E, H4FE;, HIST1H4K, H4/D, H4FD;, HIST1H4L, H4/K, H4FK;, HIST2H4A, H4/N, H4F2, H4FN, HIST2H4;, HIST2H4B, H4/O, H4FO;, HIST4H4		ABE, 17ODYA
Q93050	VPP1_HUMAN	V-type proton ATPase 116 kDa subunit a isoform 1	0.55988	0.124752	43	2	Yes	3.79e-25	24.4215						Yes	Q9Z1G4	Yes	Yes	1	1	2	ATP6V0A1, ATP6N1, ATP6N1A, VPP1	Atp6v0a1, Atp6n1	17ODYA	ABE
Q15424	SAFB1_HUMAN	Scaffold attachment factor B1	0.560472	0.0941393	58	2	Yes	4.03e-40	39.3948						No
Q5JRX3	PREP_HUMAN	Presequence protease, mitochondrial	0.560881	0.202856	12	2	Yes	2.07e-05	4.68489	1.30231	0.639797	40	2	Yes	Yes	Q8K411	Yes	Yes	1	2	3	PITRM1, KIAA1104, MP1	Pitrm1, Kiaa1104, Ntup1	17ODYA	ABE, 17ODYA
O60783	RT14_HUMAN	28S ribosomal protein S14, mitochondrial	0.560987	0.226144	3	1	n/a	0.0782131	1.10672						No
P55265	DSRAD_HUMAN	Double-stranded RNA-specific adenosine deaminase	0.562031	0.0971425	132	2	Yes	1.16e-88	87.9368	0.910558	0.3519	19	2	Yes	Yes	Q99MU3	Yes	No	3	0	3	ADAR, ADAR1, DSRAD, G1P1, IFI4		ABE, 17ODYA
P55084	ECHB_HUMAN	Trifunctional enzyme subunit beta, mitochondrial	0.563014	0.133751	155	2	Yes	6.16e-84	83.2101	0.803084	0.143249	99	2	Yes	Yes	Q99JY0	Yes	Yes	5	6	11	HADHB, MSTP029	Hadhb	ABE, 17ODYA	ABE, 17ODYA
P36957	ODO2_HUMAN	Dihydrolipoyllysine-residue succinyltransferase component of 2-oxoglutarate dehydrogenase complex, mitochondrial	0.56355	0.0792419	17	1	n/a	1.34e-13	12.8735	0.612614	0.287028	11	1	n/a	Yes	Q9D2G2	Yes	Yes	2	2	4	DLST, DLTS	Dlst	ABE, 17ODYA	ABE, 17ODYA
Q96T37	RBM15_HUMAN	Putative RNA-binding protein 15	0.564471	0.216368	5	1	n/a	0.0108143	1.966						No
P38919	IF4A3_HUMAN	Eukaryotic initiation factor 4A-III	0.565031	0.198122	71	2	Yes	1.88e-28	27.7258	0.963588	0.478208	38	2	Yes	Yes	Q91VC3	Yes	Yes	5	1	6	EIF4A3, DDX48, KIAA0111	Eif4a3, Ddx48	ABE, 17ODYA	17ODYA
P14314	GLU2B_HUMAN	Glucosidase 2 subunit beta	0.566193	0.00207292	4	1	n/a	3.01e-08	7.52177	1.22342	0.175261	53	2	Yes	Yes	O08795	Yes	Yes	3	1	4	PRKCSH, G19P1	Prkcsh	ABE, 17ODYA	17ODYA
Q9NXF1	TEX10_HUMAN	Testis-expressed sequence 10 protein	0.566651	0.0332334	9	2	Yes	1.86e-09	8.73108						No
Q9Y512	SAM50_HUMAN	Sorting and assembly machinery component 50 homolog	0.566965	0.0209997	8	1	n/a	1.14e-10	9.94199						Yes	Q8BGH2	Yes	Yes	1	2	3	SAMM50, CGI-51, SAM50, TRG3	Samm50	17ODYA	ABE
Q68D91	MBLC2_HUMAN	Metallo-beta-lactamase domain-containing protein 2	0.567218	0.144344	21	2	Yes	2.55e-11	10.5935						Yes	Q8BL86	Yes	Yes	8	1	9	MBLAC2	Mblac2, 2900024O10Rik	ABE, 17ODYA	17ODYA
Q02539	H11_HUMAN	Histone H1.1	0.569543	0.174475	28	2	No	6.33e-13	12.1983	0.52097	0.0551117	68	2	Yes	Yes	P43275	Yes	No	1	0	1	HIST1H1A, H1F1		17ODYA
P22492	H1T_HUMAN	Histone H1t	0.569543	0.174475	28	2	No	6.33e-13	12.1983	0.52097	0.0551117	68	2	Yes	No
Q9BUQ8	DDX23_HUMAN	Probable ATP-dependent RNA helicase DDX23	0.570601	0.227957	6	1	n/a	0.00576638	2.2391						No
P11182	ODB2_HUMAN	Lipoamide acyltransferase component of branched-chain alpha-keto acid dehydrogenase complex, mitochondrial	0.570652	0.328899	4	1	n/a	0.0796287	1.09893						Yes	P53395	No	Yes	0	2	2		Dbt		ABE, 17ODYA
Q96A08	H2B1A_HUMAN	Histone H2B type 1-A	0.573266	0.139932	69	2	Yes	4.91e-36	35.3087	0.651811	0.0901414	155	2	Yes	Yes	P70696	Yes	No	1	0	1	HIST1H2BA, TSH2B		ABE
O75694	NU155_HUMAN	Nuclear pore complex protein Nup155	0.573737	0.120587	82	2	Yes	2.29e-47	46.6403						Yes	Q99P88	Yes	Yes	1	1	2	NUP155, KIAA0791	Nup155	17ODYA	17ODYA
Q8N257	H2B3B_HUMAN	Histone H2B type 3-B	0.574261	0.168433	140	2	Yes	3.6e-62	61.4436	0.61676	0.090142	257	2	Yes	No
P06899	H2B1J_HUMAN	Histone H2B type 1-J	0.574261	0.168433	140	2	Yes	3.6e-62	61.4436	0.621173	0.0912431	264	2	Yes	No
P23527	H2B1O_HUMAN	Histone H2B type 1-O	0.574261	0.168433	140	2	Yes	3.6e-62	61.4436	0.621173	0.0912431	264	2	Yes	No
P33778	H2B1B_HUMAN	Histone H2B type 1-B	0.574261	0.168433	140	2	Yes	3.6e-62	61.4436	0.621173	0.0912431	264	2	Yes	No
Q16778	H2B2E_HUMAN	Histone H2B type 2-E	0.574261	0.168433	140	2	Yes	3.6e-62	61.4436	0.621173	0.0912431	264	2	Yes	No
Q9Y4L1	HYOU1_HUMAN	Hypoxia up-regulated protein 1	0.574598	0.0655308	13	2	Yes	9.83e-11	10.0074	0.965767	0.138826	64	2	Yes	Yes	Q9JKR6	Yes	Yes	2	1	3	HYOU1, GRP170, ORP150	Hyou1, Grp170	17ODYA	17ODYA
Q08170	SRSF4_HUMAN	Serine/arginine-rich splicing factor 4	0.574705	0.145898	84	2	Yes	3.17e-42	41.4992						No
P78527	PRKDC_HUMAN	DNA-dependent protein kinase catalytic subunit	0.575611	0.152985	747	2	Yes	0		0.772504	0.165107	273	2	Yes	Yes	P97313	Yes	No	3	0	3	PRKDC, HYRC, HYRC1		17ODYA
Q8WXF0	SRS12_HUMAN	Serine/arginine-rich splicing factor 12	0.576011	0.117796	24	2	Yes	1.82e-14	13.7398						No
P03989	1B27_HUMAN	HLA class I histocompatibility antigen, B-27 alpha chain	0.576076	0.10743	14	2	Yes	4.66e-09	8.33201						Yes	-	Yes	No	1	0	1	HLA-B, HLAB		ABE
P18463	1B37_HUMAN	HLA class I histocompatibility antigen, B-37 alpha chain	0.576076	0.10743	14	2	Yes	4.66e-09	8.33201						Yes	-	Yes	No	1	0	1	HLA-B, HLAB		ABE
Q95365	1B38_HUMAN	HLA class I histocompatibility antigen, B-38 alpha chain	0.576076	0.10743	14	2	Yes	4.66e-09	8.33201						Yes	-	Yes	No	1	0	1	HLA-B, HLAB		ABE
Q04826	1B40_HUMAN	HLA class I histocompatibility antigen, B-40 alpha chain	0.576076	0.10743	14	2	Yes	4.66e-09	8.33201						Yes	-	Yes	No	1	0	1	HLA-B, HLAB		ABE
P30481	1B44_HUMAN	HLA class I histocompatibility antigen, B-44 alpha chain	0.576076	0.10743	14	2	Yes	4.66e-09	8.33201						Yes	-	Yes	No	2	0	2	HLA-B, HLAB		ABE, 17ODYA
P30483	1B45_HUMAN	HLA class I histocompatibility antigen, B-45 alpha chain	0.576076	0.10743	14	2	Yes	4.66e-09	8.33201						Yes	-	Yes	No	1	0	1	HLA-B, HLAB		ABE
P30485	1B47_HUMAN	HLA class I histocompatibility antigen, B-47 alpha chain	0.576076	0.10743	14	2	Yes	4.66e-09	8.33201						Yes	-	Yes	No	1	0	1	HLA-B, HLAB		ABE
P30487	1B49_HUMAN	HLA class I histocompatibility antigen, B-49 alpha chain	0.576076	0.10743	14	2	Yes	4.66e-09	8.33201						Yes	-	Yes	No	1	0	1	HLA-B, HLAB		ABE
Q29718	1B82_HUMAN	HLA class I histocompatibility antigen, B-82 alpha chain	0.576076	0.10743	14	2	Yes	4.66e-09	8.33201						Yes	-	Yes	No	1	0	1	HLA-B, HLAB		ABE
P30461	1B13_HUMAN	HLA class I histocompatibility antigen, B-13 alpha chain	0.576076	0.10743	14	2	Yes	4.66e-09	8.33201						No
P30475	1B39_HUMAN	HLA class I histocompatibility antigen, B-39 alpha chain	0.576076	0.10743	14	2	Yes	4.66e-09	8.33201						No
P30488	1B50_HUMAN	HLA class I histocompatibility antigen, B-50 alpha chain	0.576076	0.10743	14	2	Yes	4.66e-09	8.33201						No
Q29836	1B67_HUMAN	HLA class I histocompatibility antigen, B-67 alpha chain	0.576076	0.10743	14	2	Yes	4.66e-09	8.33201						No
Q6DN03	H2B2C_HUMAN	Putative histone H2B type 2-C	0.577946	0.0804708	4	1	n/a	0.00184997	2.73284	0.55376	0.0838756	59	2	Yes	No
Q6DRA6	H2B2D_HUMAN	Putative histone H2B type 2-D	0.577946	0.0804708	4	1	n/a	0.00184997	2.73284	0.55376	0.0838756	59	2	Yes	No
Q92621	NU205_HUMAN	Nuclear pore complex protein Nup205	0.578079	0.232999	45	2	Yes	1.72e-15	14.7656						Yes	-	Yes	No	1	0	1	NUP205, C7orf14, KIAA0225		17ODYA
P42765	THIM_HUMAN	3-ketoacyl-CoA thiolase, mitochondrial	0.578538	0.123184	23	1	n/a	7.97e-14	13.0987	0.840485	0.132221	106	2	Yes	Yes	Q8BWT1	No	Yes	0	6	6		Acaa2		ABE, 17ODYA
P62807	H2B1C_HUMAN	Histone H2B type 1-C/E/F/G/I	0.578958	0.168413	150	2	Yes	6.44e-66	65.191	0.643182	0.0843694	307	2	Yes	Yes	Q6ZWY9	Yes	No	2	0	2	HIST1H2BC, H2BFL;, HIST1H2BE, H2BFH;, HIST1H2BF, H2BFG;, HIST1H2BG, H2BFA;, HIST1H2BI, H2BFK		17ODYA
P58876	H2B1D_HUMAN	Histone H2B type 1-D	0.578958	0.168413	150	2	Yes	6.44e-66	65.191	0.643182	0.0843694	307	2	Yes	Yes	-	Yes	No	1	0	1	HIST1H2BD, H2BFB, HIRIP2		17ODYA
Q93079	H2B1H_HUMAN	Histone H2B type 1-H	0.578958	0.168413	150	2	Yes	6.44e-66	65.191	0.643182	0.0843694	307	2	Yes	Yes	Q64478	Yes	No	1	0	1	HIST1H2BH, H2BFJ		17ODYA
O60814	H2B1K_HUMAN	Histone H2B type 1-K	0.578958	0.168413	150	2	Yes	6.44e-66	65.191	0.643182	0.0843694	307	2	Yes	Yes	Q8CGP1	Yes	No	1	0	1	HIST1H2BK, H2BFT, HIRIP1		17ODYA
Q99880	H2B1L_HUMAN	Histone H2B type 1-L	0.578958	0.168413	150	2	Yes	6.44e-66	65.191	0.639914	0.0835521	300	2	Yes	Yes	-	Yes	No	2	0	2	HIST1H2BL, H2BFC		17ODYA
Q99879	H2B1M_HUMAN	Histone H2B type 1-M	0.578958	0.168413	150	2	Yes	6.44e-66	65.191	0.643182	0.0843694	307	2	Yes	Yes	P10854	Yes	No	1	0	1	HIST1H2BM, H2BFE		17ODYA
Q99877	H2B1N_HUMAN	Histone H2B type 1-N	0.578958	0.168413	150	2	Yes	6.44e-66	65.191	0.643182	0.0843694	307	2	Yes	Yes	-	Yes	No	2	0	2	HIST1H2BN, H2BFD		ABE, 17ODYA
Q5QNW6	H2B2F_HUMAN	Histone H2B type 2-F	0.578958	0.168413	150	2	Yes	6.44e-66	65.191	0.643182	0.0843694	307	2	Yes	Yes	-	Yes	No	1	0	1	HIST2H2BF		17ODYA
P57053	H2BFS_HUMAN	Histone H2B type F-S	0.578958	0.168413	150	2	Yes	6.44e-66	65.191	0.643182	0.0843694	307	2	Yes	Yes	-	Yes	No	2	0	2	H2BFS		17ODYA
O14925	TIM23_HUMAN	Mitochondrial import inner membrane translocase subunit Tim23	0.579459	0.0421999	9	1	n/a	1.7e-09	8.76966						No
Q5SRD1	TI23B_HUMAN	Putative mitochondrial import inner membrane translocase subunit Tim23B	0.579459	0.0421999	9	1	n/a	1.7e-09	8.76966						No
Q12931	TRAP1_HUMAN	Heat shock protein 75 kDa, mitochondrial	0.580167	0.430981	40	2	No	3.42e-07	6.46541	0.521161	0.317266	99	2	No	Yes	Q9CQN1	No	Yes	0	2	2		Trap1, Hsp75		ABE, 17ODYA
O60264	SMCA5_HUMAN	SWI/SNF-related matrix-associated actin-dependent regulator of chromatin subfamily A member 5	0.580295	0.148681	33	1	n/a	5.44e-17	16.2644						No
P12236	ADT3_HUMAN	ADP/ATP translocase 3	0.580466	0.173398	122	2	Yes	2.34e-52	51.6301	0.591185	0.0883926	82	2	Yes	Yes	-	Yes	No	3	0	3	SLC25A6, ANT3, CDABP0051		17ODYA
P13637	AT1A3_HUMAN	Sodium/potassium-transporting ATPase subunit alpha-3	0.581312	0.13853	303	2	Yes	8.31e-154	153.08	0.823855	0.138834	100	2	Yes	Yes	Q6PIC6	Yes	Yes	1	1	2	ATP1A3	Atp1a3	17ODYA	ABE
Q6P1L8	RM14_HUMAN	39S ribosomal protein L14, mitochondrial	0.582257	0.180067	10	1	n/a	4.39e-05	4.35743						No
O00232	PSD12_HUMAN	26S proteasome non-ATPase regulatory subunit 12	0.584008	0.329399	9	1	n/a	0.00532209	2.27392	0.774686	0.575245	19	1	n/a	Yes	Q9D8W5	Yes	Yes	1	1	2	PSMD12	Psmd12	17ODYA	17ODYA
Q03252	LMNB2_HUMAN	Lamin-B2	0.584111	0.0445019	6	2	Yes	2.16e-05	4.66605	1.01011	0.296832	37	2	Yes	No
Q8N1F7	NUP93_HUMAN	Nuclear pore complex protein Nup93	0.584144	0.142772	26	2	Yes	1.35e-13	12.8707						Yes	Q8BJ71	Yes	Yes	1	1	2	NUP93, KIAA0095	Nup93, Cip4, Kiaa0095	17ODYA	17ODYA
Q16718	NDUA5_HUMAN	NADH dehydrogenase [ubiquinone] 1 alpha subcomplex subunit 5	0.58496	0.0358989	9	1	n/a	5.22e-10	9.28218	0.815293	0.196403	26	2	Yes	No
Q9UHX1	PUF60_HUMAN	Poly(U)-binding-splicing factor PUF60	0.585094	0.147599	33	2	Yes	1.21e-16	15.9163	0.9589	0.00161658	4	1	n/a	Yes	Q3UEB3	No	Yes	0	1	1		Puf60		17ODYA
P50993	AT1A2_HUMAN	Sodium/potassium-transporting ATPase subunit alpha-2	0.585882	0.139287	243	2	Yes	4.91e-122	121.309	0.823855	0.138834	100	2	Yes	Yes	Q6PIE5	Yes	Yes	1	1	2	ATP1A2, KIAA0778	Atp1a2	17ODYA	ABE
Q15427	SF3B4_HUMAN	Splicing factor 3B subunit 4	0.587095	0.102958	5	1	n/a	0.000855624	3.06772						No
Q9ULE3	DEN2A_HUMAN	DENN domain-containing protein 2A	0.587104	0.179097	5	1	n/a	0.00672067	2.17259						No
Q96EP5	DAZP1_HUMAN	DAZ-associated protein 1	0.589037	0.138313	13	2	No	3.7e-07	6.43188	0.574277	0.10531	36	2	Yes	No
Q96A33	CCD47_HUMAN	Coiled-coil domain-containing protein 47	0.589563	0.0493032	28	2	Yes	5.89e-26	25.2303	0.566913	0.0287176	6	1	n/a	Yes	Q9D024	No	Yes	0	1	1		Ccdc47, Asp4		17ODYA
Q06136	KDSR_HUMAN	3-ketodihydrosphingosine reductase	0.589986	0.0313445	4	1	n/a	0.000122516	3.91181						No
Q32P51	RA1L2_HUMAN	Heterogeneous nuclear ribonucleoprotein A1-like 2	0.590941	0.199696	106	2	Yes	2.37e-39	38.6257	0.529956	0.0850169	181	2	Yes	Yes	-	Yes	No	2	0	2	HNRNPA1L2, HNRNPA1L		ABE, 17ODYA
P05023	AT1A1_HUMAN	Sodium/potassium-transporting ATPase subunit alpha-1	0.59126	0.13773	593	2	Yes	1.41e-295	294.851	0.813926	0.161551	197	2	Yes	Yes	Q8VDN2	Yes	Yes	5	3	8	ATP1A1	Atp1a1	ABE, 17ODYA	ABE, 17ODYA
P18464	1B51_HUMAN	HLA class I histocompatibility antigen, B-51 alpha chain	0.591776	0.118865	14	2	Yes	2.25e-08	7.64829						Yes	-	Yes	No	1	0	1	HLA-B, HLAB		ABE
P30490	1B52_HUMAN	HLA class I histocompatibility antigen, B-52 alpha chain	0.591776	0.118865	14	2	Yes	2.25e-08	7.64829						No
P30498	1B78_HUMAN	HLA class I histocompatibility antigen, B-78 alpha chain	0.591776	0.118865	14	2	Yes	2.25e-08	7.64829						No
Q14498	RBM39_HUMAN	RNA-binding protein 39	0.593719	0.148651	79	2	Yes	7.6e-38	37.1189	0.347216	0.0958406	17	1	n/a	Yes	Q8VH51	Yes	No	1	0	1	RBM39, HCC1, RNPC2		17ODYA
Q13523	PRP4B_HUMAN	Serine/threonine-protein kinase PRP4 homolog	0.594227	0.269322	12	1	n/a	0.000285871	3.54383						Yes	Q61136	Yes	No	1	0	1	PRPF4B, KIAA0536, PRP4, PRP4H, PRP4K		17ODYA
P43243	MATR3_HUMAN	Matrin-3	0.595065	0.135815	161	2	Yes	2.08e-81	80.6813	0.610065	0.146606	196	2	Yes	Yes	Q8K310	Yes	Yes	2	1	3	MATR3, KIAA0723	Matr3	17ODYA	ABE
P20339	RAB5A_HUMAN	Ras-related protein Rab-5A	0.595944	0.161618	4	1	n/a	0.0153912	1.81273						Yes	Q9CQD1	No	Yes	0	1	1		Rab5a, nnyRab5a		ABE
P61020	RAB5B_HUMAN	Ras-related protein Rab-5B	0.595944	0.161618	4	1	n/a	0.0153912	1.81273	0.754786	0.142924	3	1	n/a	Yes	P61021	No	Yes	0	1	1		Rab5b		17ODYA
Q96TC7	RMD3_HUMAN	Regulator of microtubule dynamics protein 3	0.597133	0.179122	13	1	n/a	3.27e-06	5.48529						No
Q8WXH0	SYNE2_HUMAN	Nesprin-2	0.599434	0.120448	65	1	n/a	1.64e-36	35.7855						No
Q08211	DHX9_HUMAN	ATP-dependent RNA helicase A	0.59947	0.136948	396	2	Yes	1.4e-195	194.855	0.571787	0.110834	165	2	Yes	Yes	O70133	Yes	Yes	2	1	3	DHX9, DDX9, LKP, NDH2	Dhx9, Ddx9	17ODYA	ABE
P54886	P5CS_HUMAN	Delta-1-pyrroline-5-carboxylate synthase	0.600009	0.105635	21	1	n/a	1.59e-13	12.7974	0.813242	0.109487	47	2	Yes	Yes	Q9Z110	Yes	Yes	3	3	6	ALDH18A1, GSAS, P5CS, PYCS	Aldh18a1, P5cs, Pycs	ABE, 17ODYA	17ODYA
P0CG38	POTEI_HUMAN	POTE ankyrin domain family member I	0.600417	0.133763	76	2	Yes	5.31e-39	38.275	1.11108	0.17415	83	2	Yes	No
P0CG39	POTEJ_HUMAN	POTE ankyrin domain family member J	0.600417	0.133763	76	2	Yes	5.31e-39	38.275	1.11108	0.17415	83	2	Yes	No
P23246	SFPQ_HUMAN	Splicing factor, proline- and glutamine-rich	0.60142	0.128158	197	2	Yes	1.35e-102	101.871	0.595221	0.17455	137	2	Yes	Yes	Q8VIJ6	Yes	Yes	3	1	4	SFPQ, PSF	Psf, Sfpq	ABE, 17ODYA	17ODYA
O75380	NDUS6_HUMAN	NADH dehydrogenase [ubiquinone] iron-sulfur protein 6, mitochondrial	0.602162	0.280024	18	2	No	1.76e-05	4.75498						No
Q9HDC9	APMAP_HUMAN	Adipocyte plasma membrane-associated protein	0.602199	0.102464	50	2	Yes	5.32e-31	30.2737						Yes	Q9D7N9	Yes	Yes	2	3	5	APMAP, C20orf3, UNQ1869/PRO4305	Apmap, 2310001A20Rik	17ODYA	ABE, 17ODYA
Q9Y230	RUVB2_HUMAN	RuvB-like 2	0.602794	0.130507	30	2	Yes	4.53e-16	15.344						Yes	Q9WTM5	Yes	No	2	0	2	RUVBL2, INO80J, TIP48, TIP49B, CGI-46		17ODYA
Q6ZRV2	FA83H_HUMAN	Protein FAM83H	0.603625	0.218947	3	1	n/a	0.0884234	1.05343						No
Q96EE3	SEH1_HUMAN	Nucleoporin SEH1	0.603639	0.145708	4	1	n/a	0.0121929	1.91389						Yes	Q8R2U0	Yes	No	2	0	2	SEH1L, SEC13L, SEH1		ABE
Q99459	CDC5L_HUMAN	Cell division cycle 5-like protein	0.604854	0.0210593	5	1	n/a	1.93e-06	5.71468						No
Q9Y3T9	NOC2L_HUMAN	Nucleolar complex protein 2 homolog	0.60605	0.295656	10	1	n/a	0.0022607	2.64576						Yes	Q9WV70	Yes	No	1	0	1	NOC2L, NIR		17ODYA
Q00839	HNRPU_HUMAN	Heterogeneous nuclear ribonucleoprotein U	0.607079	0.126622	339	2	Yes	2e-175	174.699	0.599556	0.153755	378	2	Yes	Yes	Q8VEK3	Yes	Yes	2	1	3	HNRNPU, HNRPU, SAFA, U21.1	Hnrnpu, Hnrpu	17ODYA	ABE
Q9UQE7	SMC3_HUMAN	Structural maintenance of chromosomes protein 3	0.607276	0.166014	32	1	n/a	2.02e-14	13.6955						No
P30464	1B15_HUMAN	HLA class I histocompatibility antigen, B-15 alpha chain	0.607316	0.110048	16	2	Yes	9.8e-10	9.00874						Yes	-	Yes	No	1	0	1	HLA-B, HLAB		ABE
P30685	1B35_HUMAN	HLA class I histocompatibility antigen, B-35 alpha chain	0.607316	0.110048	16	2	Yes	9.8e-10	9.00874						Yes	-	Yes	No	1	0	1	HLA-B, HLAB		ABE
P30493	1B55_HUMAN	HLA class I histocompatibility antigen, B-55 alpha chain	0.607316	0.110048	16	2	Yes	9.8e-10	9.00874						Yes	-	Yes	No	1	0	1	HLA-B, HLAB, CDABP0067		ABE
P30484	1B46_HUMAN	HLA class I histocompatibility antigen, B-46 alpha chain	0.607316	0.110048	16	2	Yes	9.8e-10	9.00874						No
P30491	1B53_HUMAN	HLA class I histocompatibility antigen, B-53 alpha chain	0.607316	0.110048	16	2	Yes	9.8e-10	9.00874						No
P30495	1B56_HUMAN	HLA class I histocompatibility antigen, B-56 alpha chain	0.607316	0.110048	16	2	Yes	9.8e-10	9.00874						No
Q29940	1B59_HUMAN	HLA class I histocompatibility antigen, B-59 alpha chain	0.607316	0.110048	16	2	Yes	9.8e-10	9.00874						No
Q9Y265	RUVB1_HUMAN	RuvB-like 1	0.608464	0.101218	48	2	Yes	1.02e-29	28.9898	0.973594	0.151218	32	2	Yes	Yes	P60122	Yes	No	1	0	1	RUVBL1, INO80H, NMP238, TIP49, TIP49A		17ODYA
Q13148	TADBP_HUMAN	TAR DNA-binding protein 43	0.608529	0.123311	60	2	Yes	2.28e-32	31.6415	0.739728	0.158955	87	2	Yes	Yes	Q921F2	No	Yes	0	1	1		Tardbp, Tdp43		ABE
Q01831	XPC_HUMAN	DNA repair protein complementing XP-C cells	0.608946	0.300585	10	1	n/a	0.00262113	2.58151						No
Q6P9B6	TLDC1_HUMAN	TLD domain-containing protein 1	0.609164	0.2661	6	1	n/a	0.015581	1.80741						No
Q9NYL9	TMOD3_HUMAN	Tropomodulin-3	0.609471	0.127289	10	2	Yes	1.06e-05	4.9733	0.986369	0.143185	4	1	n/a	No
P20648	ATP4A_HUMAN	Potassium-transporting ATPase alpha chain 1	0.613168	0.153113	31	2	Yes	1.74e-14	13.7593	0.816515	0.112461	10	2	Yes	No
P60660	MYL6_HUMAN	Myosin light polypeptide 6	0.613687	0.0301231	17	2	Yes	1.83e-18	17.738	3.62926	0.748688	119	2	Yes	Yes	Q60605	Yes	Yes	2	1	3	MYL6	Myl6, Myln	17ODYA	17ODYA
Q96QV6	H2A1A_HUMAN	Histone H2A type 1-A	0.6138	0.0109697	4	1	n/a	6.31e-06	5.19979	0.671449	0.174601	97	2	Yes	Yes	-	Yes	No	1	0	1	HIST1H2AA, H2AFR		17ODYA
P16104	H2AX_HUMAN	Histone H2AX	0.6138	0.0109697	4	1	n/a	6.31e-06	5.19979	0.633465	0.126103	160	2	Yes	Yes	P27661	Yes	No	1	0	1	H2AFX, H2AX		ABE
P0C0S5	H2AZ_HUMAN	Histone H2A.Z	0.6138	0.0109697	4	1	n/a	6.31e-06	5.19979	0.552025	0.143504	127	2	Yes	No
Q71UI9	H2AV_HUMAN	Histone H2A.V	0.6138	0.0109697	4	1	n/a	6.31e-06	5.19979	0.552025	0.143504	127	2	Yes	No
Q8IUE6	H2A2B_HUMAN	Histone H2A type 2-B	0.6138	0.0109697	4	1	n/a	6.31e-06	5.19979	0.63729	0.134532	121	2	Yes	No
O43390	HNRPR_HUMAN	Heterogeneous nuclear ribonucleoprotein R	0.614114	0.142534	324	2	Yes	1.18e-150	149.927	0.672425	0.173704	103	2	Yes	Yes	-	Yes	No	1	0	1	HNRNPR, HNRPR		17ODYA
P31943	HNRH1_HUMAN	Heterogeneous nuclear ribonucleoprotein H	0.616071	0.139415	321	2	Yes	2.36e-151	150.628	0.601117	0.106453	234	2	Yes	Yes	O35737	Yes	Yes	2	1	3	HNRNPH1, HNRPH, HNRPH1	Hnrnph1, Hnrph, Hnrph1	17ODYA	17ODYA
O75533	SF3B1_HUMAN	Splicing factor 3B subunit 1	0.618297	0.147312	167	2	Yes	1.76e-75	74.7543	0.394758	0.116308	19	1	n/a	Yes	Q99NB9	Yes	Yes	3	1	4	SF3B1, SAP155	Sf3b1, Sap155	17ODYA	17ODYA
P52272	HNRPM_HUMAN	Heterogeneous nuclear ribonucleoprotein M	0.6183	0.117373	207	2	Yes	2.27e-111	110.644	0.595266	0.142087	204	2	Yes	Yes	Q9D0E1	Yes	Yes	3	2	5	HNRNPM, HNRPM, NAGR1	Hnrnpm, Hnrpm	ABE, 17ODYA	17ODYA
P58107	EPIPL_HUMAN	Epiplakin	0.618359	0.322529	110	2	Yes	1.63e-22	21.7879	1.67746	0.12171	9	1	n/a	No
P11387	TOP1_HUMAN	DNA topoisomerase 1	0.61861	0.152418	114	2	Yes	2.08e-50	49.681						No
Q13247	SRSF6_HUMAN	Serine/arginine-rich splicing factor 6	0.621084	0.17515	98	2	Yes	2.43e-38	37.6143	0.660256	0.16396	14	2	No	Yes	Q3TWW8	Yes	No	1	0	1	SRSF6, SFRS6, SRP55		17ODYA
Q9ULC5	ACSL5_HUMAN	Long-chain-fatty-acid--CoA ligase 5	0.623068	0.131143	33	2	Yes	6.53e-17	16.1852	1.41808	0.191234	14	2	No	Yes	Q8JZR0	No	Yes	0	2	2		Acsl5, Facl5		17ODYA
Q7L2E3	DHX30_HUMAN	Putative ATP-dependent RNA helicase DHX30	0.623985	0.0526752	13	1	n/a	7.21e-12	11.1419						Yes	Q99PU8	No	Yes	0	1	1		Dhx30, Helg		17ODYA
Q13435	SF3B2_HUMAN	Splicing factor 3B subunit 2	0.624395	0.184276	12	1	n/a	2.1e-05	4.6784	0.568762	0.212716	10	1	n/a	Yes	-	Yes	No	1	0	1	SF3B2, SAP145		17ODYA
P84103	SRSF3_HUMAN	Serine/arginine-rich splicing factor 3	0.624643	0.107592	105	2	Yes	7.12e-60	59.1473	0.640391	0.0830099	65	2	Yes	No
P61978	HNRPK_HUMAN	Heterogeneous nuclear ribonucleoprotein K	0.624729	0.137488	198	2	Yes	3.7e-93	92.4315	0.735009	0.107236	317	2	Yes	Yes	P61979	Yes	Yes	3	1	4	HNRNPK, HNRPK	Hnrnpk, Hnrpk	ABE, 17ODYA	17ODYA
P33121	ACSL1_HUMAN	Long-chain-fatty-acid--CoA ligase 1	0.624781	0.133813	238	2	Yes	3.5e-114	113.456	1.44005	0.363348	126	2	No	Yes	P41216	Yes	Yes	1	1	2	ACSL1, FACL1, FACL2, LACS, LACS1, LACS2	Acsl1, Acsl2, Facl2	ABE	ABE
P35579	MYH9_HUMAN	Myosin-9	0.625435	0.191486	533	2	Yes	5.57e-184	183.254	4.46042	1.26558	328	2	Yes	Yes	Q8VDD5	Yes	Yes	2	1	3	MYH9	Myh9	17ODYA	ABE
P51148	RAB5C_HUMAN	Ras-related protein Rab-5C	0.626095	0.16437	42	2	Yes	9.21e-18	17.0357	0.76734	0.115816	11	1	n/a	Yes	P35278	Yes	Yes	5	2	7	RAB5C, RABL	Rab5c	ABE, 17ODYA	ABE, 17ODYA
P27105	STOM_HUMAN	Erythrocyte band 7 integral membrane protein	0.626331	0.126828	309	2	Yes	9.08e-154	153.042	0.674239	0.148468	47	2	Yes	Yes	P54116	Yes	Yes	8	4	12	STOM, BND7, EPB72	Stom, Epb7.2, Epb72	ABE, 17ODYA	ABE, 17ODYA
P20700	LMNB1_HUMAN	Lamin-B1	0.628026	0.183547	189	2	Yes	1.78e-68	67.75	0.681577	0.160839	189	2	Yes	Yes	P14733	Yes	No	2	0	2	LMNB1, LMN2, LMNB		17ODYA
P68032	ACTC_HUMAN	Actin, alpha cardiac muscle 1	0.628715	0.148685	464	2	Yes	4.88e-201	200.312	1.1219	0.143924	281	2	Yes	Yes	P68033	Yes	Yes	2	2	4	ACTC1, ACTC	Actc1, Actc	17ODYA	ABE, 17ODYA
P68133	ACTS_HUMAN	Actin, alpha skeletal muscle	0.628715	0.148685	464	2	Yes	4.88e-201	200.312	1.12068	0.14265	280	2	Yes	Yes	P68134	Yes	Yes	3	1	4	ACTA1, ACTA	Acta1, Acta	17ODYA	ABE
P49748	ACADV_HUMAN	Very long-chain specific acyl-CoA dehydrogenase, mitochondrial	0.628869	0.176556	129	2	Yes	8.67e-49	48.0618	1.10903	0.245001	65	2	Yes	Yes	P50544	Yes	Yes	1	2	3	ACADVL, VLCAD	Acadvl, Vlcad	17ODYA	ABE, 17ODYA
P60709	ACTB_HUMAN	Actin, cytoplasmic 1	0.629225	0.157777	764	2	Yes	0		1.11925	0.172495	659	2	Yes	Yes	P60710	Yes	Yes	3	2	5	ACTB	Actb	ABE, 17ODYA	ABE
P63261	ACTG_HUMAN	Actin, cytoplasmic 2	0.629225	0.157777	764	2	Yes	0		1.11925	0.172495	659	2	Yes	Yes	P63260	Yes	Yes	2	1	3	ACTG1, ACTB, ACTG	Actg1, Actg	ABE, 17ODYA	ABE
Q07666	KHDR1_HUMAN	KH domain-containing, RNA-binding, signal transduction-associated protein 1	0.630742	0.159231	85	2	Yes	1.66e-35	34.78	0.693359	0.107222	48	2	Yes	Yes	Q60749	Yes	No	1	0	1	KHDRBS1, SAM68		ABE
Q9Y2L1	RRP44_HUMAN	Exosome complex exonuclease RRP44	0.631199	0.181516	3	1	n/a	0.0721204	1.14194						No
Q6S8J3	POTEE_HUMAN	POTE ankyrin domain family member E	0.631503	0.153942	144	2	Yes	5.04e-61	60.2976	1.11213	0.178624	174	2	Yes	No
P13646	K1C13_HUMAN	Keratin, type I cytoskeletal 13	0.631766	0.49805	50	2	No	3.69e-06	5.43265	0.821698	0.302199	42	2	No	No
Q8NBM4	UBAC2_HUMAN	Ubiquitin-associated domain-containing protein 2	0.632263	0.00328494	6	2	Yes	1.06e-09	8.97423						No
Q05519	SRS11_HUMAN	Serine/arginine-rich splicing factor 11	0.633014	0.0263746	6	1	n/a	4.09e-07	6.38839						Yes	-	Yes	No	1	0	1	SRSF11, SFRS11		17ODYA
A5A3E0	POTEF_HUMAN	POTE ankyrin domain family member F	0.633337	0.140894	107	2	Yes	6.15e-49	48.2108	1.11081	0.166342	106	2	Yes	No
P62736	ACTA_HUMAN	Actin, aortic smooth muscle	0.633628	0.148714	449	2	Yes	2.52e-192	191.599	1.12023	0.131393	247	2	Yes	Yes	P62737	Yes	No	1	0	1	ACTA2, ACTSA, ACTVS, GIG46		17ODYA
P63267	ACTH_HUMAN	Actin, gamma-enteric smooth muscle	0.633628	0.148714	449	2	Yes	2.52e-192	191.599	1.12165	0.129874	246	2	Yes	Yes	P63268	Yes	No	1	0	1	ACTG2, ACTA3, ACTL3, ACTSG		17ODYA
Q14151	SAFB2_HUMAN	Scaffold attachment factor B2	0.633908	0.0893718	38	1	n/a	6.32e-25	24.1994						No
Q14103	HNRPD_HUMAN	Heterogeneous nuclear ribonucleoprotein D0	0.63496	0.134082	93	2	Yes	3.06e-44	43.5146	0.681392	0.118135	173	2	Yes	Yes	Q60668	Yes	Yes	2	2	4	HNRNPD, AUF1, HNRPD	Hnrnpd, Auf1, Hnrpd	17ODYA	ABE, 17ODYA
P62316	SMD2_HUMAN	Small nuclear ribonucleoprotein Sm D2	0.63511	0.0148815	6	2	Yes	4.6e-07	6.33702	0.625482	0.0504787	34	2	Yes	Yes	P62317	Yes	No	1	0	1	SNRPD2, SNRPD1		17ODYA
Q9NUN5	LMBD1_HUMAN	Probable lysosomal cobalamin transporter	0.635505	0.111164	17	2	Yes	8.34e-10	9.07881						Yes	Q8K0B2	Yes	Yes	3	1	4	LMBRD1, C6orf209, NESI, BM-021, CD001, MSTP044	Lmbrd1	ABE, 17ODYA	17ODYA
O14672	ADA10_HUMAN	Disintegrin and metalloproteinase domain-containing protein 10	0.635886	0.127176	9	1	n/a	2.61e-05	4.5835						Yes	O35598	Yes	Yes	7	5	12	ADAM10, KUZ, MADM	Adam10, Kuz, Madm	ABE, 17ODYA	ABE, 17ODYA
P01111	RASN_HUMAN	GTPase NRas	0.637068	0.189106	26	2	Yes	7.49e-10	9.12571						Yes	P08556	Yes	Yes	10	5	15	NRAS, HRAS1	Nras	ABE, 17ODYA	ABE, 17ODYA
P30492	1B54_HUMAN	HLA class I histocompatibility antigen, B-54 alpha chain	0.642498	0.178101	7	2	No	0.0031639	2.49978						Yes	-	Yes	No	1	0	1	HLA-B, HLAB		ABE
P18465	1B57_HUMAN	HLA class I histocompatibility antigen, B-57 alpha chain	0.642498	0.178101	7	2	No	0.0031639	2.49978						Yes	-	Yes	No	1	0	1	HLA-B, HLAB		ABE
P10319	1B58_HUMAN	HLA class I histocompatibility antigen, B-58 alpha chain	0.642498	0.178101	7	2	No	0.0031639	2.49978						Yes	-	Yes	No	1	0	1	HLA-B, HLAB		ABE
P30040	ERP29_HUMAN	Endoplasmic reticulum resident protein 29	0.643181	0.0948244	6	1	n/a	0.00025236	3.59798	0.760002	0.135877	36	2	Yes	Yes	P57759	Yes	No	2	0	2	ERP29, C12orf8, ERP28		ABE
P55795	HNRH2_HUMAN	Heterogeneous nuclear ribonucleoprotein H2	0.644382	0.135641	212	2	Yes	1.97e-96	95.7064	0.76033	0.272587	162	2	Yes	No
Q96I24	FUBP3_HUMAN	Far upstream element-binding protein 3	0.64441	0.146476	44	2	Yes	1.41e-19	18.8523						Yes	-	Yes	No	1	0	1	FUBP3, FBP3, Fubp3		ABE
P09874	PARP1_HUMAN	Poly [ADP-ribose] polymerase 1	0.646136	0.192313	159	2	Yes	1.33e-52	51.8761	0.560227	0.111818	126	2	Yes	Yes	P11103	Yes	No	2	0	2	PARP1, ADPRT, PPOL		ABE, 17ODYA
P01112	RASH_HUMAN	GTPase HRas	0.646248	0.188282	29	2	Yes	1.1e-10	9.9572						Yes	Q61411	Yes	Yes	10	4	14	HRAS, HRAS1	Hras1, Hras	ABE, 17ODYA	ABE, 17ODYA
P14625	ENPL_HUMAN	Endoplasmin	0.648448	0.187179	61	2	Yes	2.42e-21	20.6164	0.983186	0.170216	414	2	Yes	Yes	P08113	Yes	Yes	2	2	4	HSP90B1, GRP94, TRA1	Hsp90b1, Grp94, Tra-1, Tra1	17ODYA	ABE, 17ODYA
Q9BYX7	ACTBM_HUMAN	Putative beta-actin-like protein 3	0.648827	0.134257	79	2	Yes	1.5e-36	35.8241	1.1237	0.164026	100	2	Yes	No
Q15006	EMC2_HUMAN	ER membrane protein complex subunit 2	0.650871	0.119977	15	2	Yes	4.42e-08	7.35473						No
Q8IXB1	DJC10_HUMAN	DnaJ homolog subfamily C member 10	0.651006	0.0065571	4	1	n/a	1.83e-06	5.73807						No
Q96MU7	YTDC1_HUMAN	YTH domain-containing protein 1	0.652449	0.0518366	4	1	n/a	0.000896618	3.04739						No
P26599	PTBP1_HUMAN	Polypyrimidine tract-binding protein 1	0.653917	0.187546	186	2	Yes	1.76e-61	60.7556	0.672922	0.154543	154	2	Yes	Yes	P17225	Yes	Yes	3	3	6	PTBP1, PTB	Ptbp1, Ptb	17ODYA	ABE, 17ODYA
P57740	NU107_HUMAN	Nuclear pore complex protein Nup107	0.655748	0.0609154	3	1	n/a	0.0102765	1.98816						No
Q562R1	ACTBL_HUMAN	Beta-actin-like protein 2	0.65592	0.166585	183	2	Yes	1.48e-67	66.829	1.12597	0.159599	126	2	Yes	Yes	Q8BFZ3	Yes	Yes	1	2	3	ACTBL2	Actbl, Actbl2	ABE	ABE, 17ODYA
O60506	HNRPQ_HUMAN	Heterogeneous nuclear ribonucleoprotein Q	0.657794	0.127948	392	2	Yes	3.49e-180	179.457	0.812646	0.177366	124	2	Yes	Yes	Q7TMK9	Yes	Yes	1	1	2	SYNCRIP, HNRPQ, NSAP1	Syncrip, Hnrpq, Nsap1, Nsap1l	17ODYA	17ODYA
Q13595	TRA2A_HUMAN	Transformer-2 protein homolog alpha	0.660714	0.245292	11	1	n/a	0.000999028	3.00042						No
P28288	ABCD3_HUMAN	ATP-binding cassette sub-family D member 3	0.660946	0.151827	37	2	Yes	1.61e-15	14.7923						Yes	P55096	Yes	Yes	2	1	3	ABCD3, PMP70, PXMP1	Abcd3, Pmp70, Pxmp1	17ODYA	ABE
Q09161	NCBP1_HUMAN	Nuclear cap-binding protein subunit 1	0.66173	0.0324955	11	1	n/a	9.84e-12	11.0069						Yes	Q3UYV9	Yes	No	1	0	1	NCBP1, CBP80, NCBP		17ODYA
Q9Y305	ACOT9_HUMAN	Acyl-coenzyme A thioesterase 9, mitochondrial	0.661798	0.0794365	28	2	Yes	1.39e-18	17.8582	1.25978	0.157116	14	2	Yes	Yes	Q9R0X4	Yes	Yes	1	1	2	ACOT9, CGI-16	Acot9, Acate2	17ODYA	ABE
P17844	DDX5_HUMAN	Probable ATP-dependent RNA helicase DDX5	0.662023	0.116997	181	2	Yes	3.52e-89	88.4538	0.491612	0.149907	99	2	Yes	Yes	Q61656	Yes	Yes	2	1	3	DDX5, G17P1, HELR, HLR1	Ddx5, Tnz2	17ODYA	17ODYA
P09110	THIK_HUMAN	3-ketoacyl-CoA thiolase, peroxisomal	0.662169	0.121617	18	2	Yes	2.67e-09	8.57327						Yes	-	Yes	No	3	0	3	ACAA1, ACAA, PTHIO		ABE, 17ODYA
P08107	HS71B_HUMAN; HS71A_HUMAN	Heat shock 70 kDa protein 1B; Heat shock 70 kDa protein 1A	0.663097	0.159196	80	2	Yes	6.86e-31	30.1634	1.35703	0.399647	276	2	Yes	No
Q9H3Z4	DNJC5_HUMAN	DnaJ homolog subfamily C member 5	0.664074	0.0936998	28	2	Yes	9.44e-17	16.025						Yes	P60904	Yes	Yes	10	7	17	CLN4, DNAJC5, CSP	Dnajc5, Csp	ABE, 17ODYA	ABE, 17ODYA
Q29RF7	PDS5A_HUMAN	Sister chromatid cohesion protein PDS5 homolog A	0.66512	0.0743487	12	2	Yes	2.39e-08	7.6211						Yes	Q6A026	Yes	Yes	1	1	2	PDS5A, KIAA0648, PDS5, PIG54	Pds5a, Kiaa0648	17ODYA	17ODYA
P30504	1C04_HUMAN	HLA class I histocompatibility antigen, Cw-4 alpha chain	0.666229	0.225951	4	2	No	0.0980147	1.00871						Yes	-	Yes	No	3	0	3	HLA-C, HLAC		ABE, 17ODYA
P30510	1C14_HUMAN	HLA class I histocompatibility antigen, Cw-14 alpha chain	0.666229	0.225951	4	2	No	0.0980147	1.00871						No
P60953	CDC42_HUMAN	Cell division control protein 42 homolog	0.666634	0.177454	29	2	Yes	1.11e-10	9.95602	1.25418	0.315362	46	2	Yes	Yes	P60766	Yes	Yes	5	2	7	CDC42	Cdc42	ABE, 17ODYA	ABE, 17ODYA
Q93084	AT2A3_HUMAN	Sarcoplasmic/endoplasmic reticulum calcium ATPase 3	0.666739	0.124473	15	1	n/a	5.95e-08	7.22554	0.705662	0.250205	39	2	No	Yes	Q64518	Yes	Yes	1	1	2	ATP2A3	Atp2a3	17ODYA	17ODYA
Q9BSJ8	ESYT1_HUMAN	Extended synaptotagmin-1	0.66741	0.13897	150	2	Yes	1.66e-63	62.7795	0.570547	0.152529	9	1	n/a	Yes	Q3U7R1	Yes	Yes	4	2	6	ESYT1, FAM62A, KIAA0747, MBC2	Esyt1, Fam62a, Mbc2	ABE, 17ODYA	17ODYA
Q9BXK5	B2L13_HUMAN	Bcl-2-like protein 13	0.667542	0.157111	3	1	n/a	0.0670425	1.17365						Yes	P59017	No	Yes	0	1	1		Bcl2l13, Mil1		ABE
P61221	ABCE1_HUMAN	ATP-binding cassette sub-family E member 1	0.667557	0.131735	3	1	n/a	0.0485609	1.31371						Yes	P61222	Yes	Yes	2	2	4	ABCE1, RLI, RNASEL1, RNASELI, RNS4I, OK/SW-cl.40	Abce1, Rli	ABE, 17ODYA	ABE, 17ODYA
O14979	HNRDL_HUMAN	Heterogeneous nuclear ribonucleoprotein D-like	0.668953	0.23127	76	2	Yes	6.99e-20	19.1554	0.642988	0.136209	96	2	Yes	No
Q13242	SRSF9_HUMAN	Serine/arginine-rich splicing factor 9	0.669278	0.0703846	5	1	n/a	0.000463967	3.33351	0.788314	0.564494	8	2	No	No
O00116	ADAS_HUMAN	Alkyldihydroxyacetonephosphate synthase, peroxisomal	0.669635	0.110711	43	2	Yes	2.08e-22	21.6826						Yes	Q8C0I1	Yes	No	1	0	1	AGPS, AAG5		17ODYA
P08581	MET_HUMAN	Hepatocyte growth factor receptor	0.670541	0.0562107	4	1	n/a	0.00133405	2.87483						Yes	P16056	No	Yes	0	1	1		Met		ABE
O76054	S14L2_HUMAN	SEC14-like protein 2	0.670541	0.0562107	4	1	n/a	0.00133405	2.87483						No
Q5TZA2	CROCC_HUMAN	Rootletin	0.670541	0.0562107	4	1	n/a	0.00133405	2.87483						No
Q6NUM9	RETST_HUMAN	All-trans-retinol 13,14-reductase	0.670674	0.111867	27	2	Yes	3.37e-14	13.473						Yes	Q64FW2	Yes	No	1	0	1	RETSAT, PPSIG, UNQ439/PRO872		17ODYA
Q5T9A4	ATD3B_HUMAN	ATPase family AAA domain-containing protein 3B	0.671068	0.234228	13	1	n/a	0.000278252	3.55556						No
Q9UMS4	PRP19_HUMAN	Pre-mRNA-processing factor 19	0.671677	0.153894	97	2	Yes	1.74e-37	36.7594	0.538303	0.0620992	40	2	Yes	Yes	Q99KP6	Yes	No	4	0	4	PRPF19, NMP200, PRP19, SNEV		ABE, 17ODYA
Q86UP2	KTN1_HUMAN	Kinectin	0.674765	0.202605	112	2	Yes	1.57e-32	31.8047						Yes	Q61595	No	Yes	0	1	1		Ktn1		17ODYA
O95140	MFN2_HUMAN	Mitofusin-2	0.676096	0.0723703	4	1	n/a	0.00294196	2.53136						No
P31150	GDIA_HUMAN	Rab GDP dissociation inhibitor alpha	0.67675	0.269595	3	1	n/a	0.173445	0.760837	3.21622	0.543145	53	2	Yes	Yes	P50396	Yes	Yes	2	2	4	GDI1, GDIL, OPHN2, RABGDIA, XAP4	Gdi1, Rabgdia	17ODYA	ABE
Q9H5Q4	TFB2M_HUMAN	Dimethyladenosine transferase 2, mitochondrial	0.67689	0.215897	7	1	n/a	0.00745517	2.12754						Yes	Q3TL26	Yes	No	2	0	2	TFB2M, NS5ATP5		ABE, 17ODYA
Q9Y383	LC7L2_HUMAN	Putative RNA-binding protein Luc7-like 2	0.676894	0.112191	22	1	n/a	7.97e-12	11.0988						Yes	Q7TNC4	Yes	No	1	0	1	LUC7L2, CGI-59, CGI-74		17ODYA
P53985	MOT1_HUMAN	Monocarboxylate transporter 1	0.677314	0.20984	75	2	Yes	3.2e-21	20.4948	0.58693	0.178139	20	2	No	Yes	P53986	Yes	Yes	1	1	2	SLC16A1, MCT1	Slc16a1, Mct1	17ODYA	17ODYA
P22307	NLTP_HUMAN	Non-specific lipid-transfer protein	0.677948	0.0380003	10	1	n/a	6.78e-10	9.1685						No
P12956	XRCC6_HUMAN	X-ray repair cross-complementing protein 6	0.680238	0.139307	253	2	Yes	2.13e-102	101.671	0.988179	0.200073	129	2	Yes	Yes	P23475	Yes	No	2	0	2	XRCC6, G22P1		17ODYA
P49419	AL7A1_HUMAN	Alpha-aminoadipic semialdehyde dehydrogenase	0.680452	0.290483	3	1	n/a	0.197016	0.705499	1.42975	0.274233	65	2	Yes	Yes	Q9DBF1	Yes	Yes	1	1	2	ALDH7A1, ATQ1	Aldh7a1, Ald7a1	17ODYA	ABE
P62495	ERF1_HUMAN	Eukaryotic peptide chain release factor subunit 1	0.6807	0.0300222	4	1	n/a	0.000227336	3.64333						Yes	Q8BWY3	Yes	No	3	0	3	ETF1, ERF1, RF1, SUP45L1		ABE
Q14697	GANAB_HUMAN	Neutral alpha-glucosidase AB	0.682677	0.159767	95	2	Yes	2.2e-34	33.658	1.27221	0.173086	200	2	Yes	Yes	Q8BHN3	Yes	Yes	2	1	3	GANAB, G2AN, KIAA0088	Ganab, G2an, Kiaa0088	17ODYA	ABE
Q00325	MPCP_HUMAN	Phosphate carrier protein, mitochondrial	0.687265	0.14511	99	2	Yes	1.38e-38	37.861	0.981259	0.237968	53	2	Yes	Yes	Q8VEM8	Yes	Yes	3	3	6	SLC25A3, PHC, OK/SW-cl.48	Slc25a3	17ODYA	ABE, 17ODYA
O14983	AT2A1_HUMAN	Sarcoplasmic/endoplasmic reticulum calcium ATPase 1	0.687578	0.138655	111	2	Yes	7.06e-45	44.1514						Yes	Q8R429	No	Yes	0	1	1		Atp2a1		ABE
P16615	AT2A2_HUMAN	Sarcoplasmic/endoplasmic reticulum calcium ATPase 2	0.687804	0.150648	329	2	Yes	9.79e-121	120.009	0.642626	0.122152	78	2	Yes	Yes	O55143	Yes	Yes	2	4	6	ATP2A2, ATP2B	Atp2a2	17ODYA	ABE, 17ODYA
Q9Y320	TMX2_HUMAN	Thioredoxin-related transmembrane protein 2	0.689668	0.156246	15	2	Yes	3.43e-06	5.46525						Yes	Q9D710	Yes	Yes	2	2	4	TMX2, TXNDC14, CGI-31, My009, PIG26, PSEC0045, UNQ237/PRO270	Tmx2, Txndc14	ABE	ABE, 17ODYA
P35580	MYH10_HUMAN	Myosin-10	0.692142	0.166036	123	2	Yes	2.66e-41	40.5753	3.63956	0.824183	11	1	n/a	Yes	Q61879	Yes	Yes	1	2	3	MYH10	Myh10	17ODYA	ABE
Q15717	ELAV1_HUMAN	ELAV-like protein 1	0.693171	0.148301	53	2	Yes	2.06e-20	19.6867	0.625253	0.131959	56	2	Yes	No
P30519	HMOX2_HUMAN	Heme oxygenase 2	0.693377	0.161247	68	2	Yes	6.07e-24	23.2165	0.306892	0.0530086	12	1	n/a	Yes	O70252	Yes	Yes	2	1	3	HMOX2, HO2	Hmox2	17ODYA	17ODYA
Q15459	SF3A1_HUMAN	Splicing factor 3A subunit 1	0.694099	0.1503	13	1	n/a	9e-06	5.04595						Yes	Q8K4Z5	Yes	Yes	1	2	3	SF3A1, SAP114	Sf3a1	17ODYA	17ODYA
P13010	XRCC5_HUMAN	X-ray repair cross-complementing protein 5	0.69483	0.192142	343	2	Yes	1.44e-95	94.8425	0.924908	0.199546	208	2	Yes	Yes	P27641	Yes	No	2	0	2	XRCC5, G22P2		17ODYA
P01116	RASK_HUMAN	GTPase KRas	0.695641	0.12157	21	2	Yes	5.51e-10	9.25868						Yes	P32883	Yes	Yes	4	3	7	KRAS, KRAS2, RASK2	Kras, Kras2	ABE, 17ODYA	ABE, 17ODYA
Q9P258	RCC2_HUMAN	Protein RCC2	0.695865	0.160972	8	2	No	0.00175473	2.75579						No
Q14839	CHD4_HUMAN	Chromodomain-helicase-DNA-binding protein 4	0.697531	0.184155	43	1	n/a	1.17e-13	12.9323						Yes	Q6PDQ2	Yes	No	1	0	1	CHD4		17ODYA
Q6PI48	SYDM_HUMAN	Aspartate--tRNA ligase, mitochondrial	0.698491	0.158631	3	1	n/a	0.0811904	1.0905						Yes	Q8BIP0	Yes	No	1	0	1	DARS2		ABE
Q9BZZ5	API5_HUMAN	Apoptosis inhibitor 5	0.699819	0.285672	19	2	Yes	0.000266006	3.57511	0.800772	0.266764	37	2	No	Yes	O35841	Yes	No	2	0	2	API5, MIG8		17ODYA
P84095	RHOG_HUMAN	Rho-related GTP-binding protein RhoG	0.701147	0.113937	21	2	Yes	2.52e-10	9.59876	1.15585	0.378456	32	2	Yes	Yes	P84096	Yes	No	3	0	3	RHOG, ARHG		ABE, 17ODYA
P39210	MPV17_HUMAN	Protein Mpv17	0.703553	0.163702	10	1	n/a	0.000284595	3.54577						No
Q8WUM0	NU133_HUMAN	Nuclear pore complex protein Nup133	0.703865	0.0367457	8	2	Yes	4.67e-07	6.33076						No
Q15233	NONO_HUMAN	Non-POU domain-containing octamer-binding protein	0.704688	0.237584	83	2	Yes	2.28e-18	17.6426	0.663361	0.219955	89	2	Yes	Yes	Q99K48	Yes	No	3	0	3	NONO, NRB54		ABE, 17ODYA
P35749	MYH11_HUMAN	Myosin-11	0.705189	0.206752	94	2	Yes	3.51e-24	23.4547	4.26708	1.68305	50	2	Yes	Yes	O08638	No	Yes	0	1	1		Myh11		ABE
Q12905	ILF2_HUMAN	Interleukin enhancer-binding factor 2	0.707511	0.182713	200	2	Yes	7.71e-57	56.1129	0.732524	0.211012	37	2	Yes	Yes	Q9CXY6	Yes	No	3	0	3	ILF2, NF45, PRO3063		17ODYA
Q6IBS0	TWF2_HUMAN	Twinfilin-2	0.709513	0.0029431	3	1	n/a	3.42e-05	4.46579						Yes	Q9Z0P5	Yes	No	1	0	1	TWF2, PTK9L, MSTP011		17ODYA
Q53GS9	SNUT2_HUMAN	U4/U6.U5 tri-snRNP-associated protein 2	0.709521	0.164897	15	2	No	1.22e-05	4.91364						No
P37802	TAGL2_HUMAN	Transgelin-2	0.71167	0.462211	5	1	n/a	0.235524	0.627964	3.30731	0.729047	207	2	Yes	Yes	Q9WVA4	Yes	Yes	5	1	6	TAGLN2, KIAA0120, CDABP0035	Tagln2, Kiaa0120	ABE, 17ODYA	ABE
A6NIZ1	RP1BL_HUMAN	Ras-related protein Rap-1b-like protein	0.712372	0.120241	33	2	Yes	9.94e-15	14.0026	0.848914	0.127515	45	2	Yes	No
Q13501	SQSTM_HUMAN	Sequestosome-1	0.713968	0.256549	30	2	Yes	1.37e-06	5.862	0.953986	0.143805	37	2	Yes	No
P62834	RAP1A_HUMAN	Ras-related protein Rap-1A	0.714149	0.118848	42	2	Yes	1.37e-18	17.8639	0.869211	0.109848	32	2	Yes	Yes	P62835	No	Yes	0	1	1		Rap1a, Krev-1		17ODYA
P61224	RAP1B_HUMAN	Ras-related protein Rap-1b	0.714149	0.118848	42	2	Yes	1.37e-18	17.8639	0.848914	0.127515	45	2	Yes	Yes	Q99JI6	Yes	Yes	5	2	7	RAP1B, OK/SW-cl.11	Rap1b	ABE, 17ODYA	17ODYA
Q16630	CPSF6_HUMAN	Cleavage and polyadenylation specificity factor subunit 6	0.715292	0.131036	40	2	Yes	2.54e-16	15.5957	0.90189	0.0965698	30	2	Yes	No
Q9BUJ2	HNRL1_HUMAN	Heterogeneous nuclear ribonucleoprotein U-like protein 1	0.715364	0.159523	28	2	Yes	6.92e-10	9.16001	0.630532	0.108285	7	1	n/a	Yes	Q8VDM6	Yes	No	2	0	2	HNRNPUL1, E1BAP5, HNRPUL1		ABE, 17ODYA
Q13813	SPTN1_HUMAN	Spectrin alpha chain, non-erythrocytic 1	0.717824	0.196259	383	2	Yes	4.79e-95	94.3201	1.16473	0.190513	146	2	Yes	Yes	P16546	Yes	Yes	2	3	5	SPTAN1, NEAS, SPTA2	Sptan1, Spna2, Spta2	17ODYA	ABE, 17ODYA
Q6UXN9	WDR82_HUMAN	WD repeat-containing protein 82	0.717941	0.0299865	7	1	n/a	2.77e-07	6.55746						No
Q8N766	EMC1_HUMAN	ER membrane protein complex subunit 1	0.72042	0.141773	25	2	Yes	9.97e-10	9.00151						Yes	Q8C7X2	No	Yes	0	2	2		Emc1, Kiaa0090, C230096C10Rik		17ODYA
Q969P6	TOP1M_HUMAN	DNA topoisomerase I, mitochondrial	0.722901	0.059617	8	1	n/a	3.44e-06	5.46356						No
Q12874	SF3A3_HUMAN	Splicing factor 3A subunit 3	0.722908	0.145658	15	2	Yes	5.44e-06	5.26424	0.570196	0.10765	39	2	Yes	Yes	Q9D554	Yes	Yes	1	1	2	SF3A3, SAP61	Sf3a3, Sap61	17ODYA	17ODYA
O15042	SR140_HUMAN	U2 snRNP-associated SURP motif-containing protein	0.724558	0.0468815	12	1	n/a	4.43e-10	9.35355						Yes	Q6NV83	Yes	No	1	0	1	U2SURP, KIAA0332, SR140		17ODYA
P08621	RU17_HUMAN	U1 small nuclear ribonucleoprotein 70 kDa	0.724737	0.147437	34	2	Yes	2.73e-12	11.5642						Yes	Q62376	Yes	No	1	0	1	SNRNP70, RNPU1Z, RPU1, SNRP70, U1AP1		17ODYA
P34931	HS71L_HUMAN	Heat shock 70 kDa protein 1-like	0.72493	0.14368	79	2	Yes	8.28e-28	27.0821	1.14086	0.308358	164	2	Yes	Yes	P16627	Yes	Yes	1	1	2	HSPA1L	Hspa1l, Hsc70t	17ODYA	ABE
Q14974	IMB1_HUMAN	Importin subunit beta-1	0.725286	0.185823	70	2	Yes	4.55e-19	18.3421	1.56143	0.631234	81	2	Yes	Yes	P70168	Yes	Yes	3	5	8	KPNB1, NTF97	Kpnb1, Impnb	17ODYA	ABE, 17ODYA
Q9ULG3	K1257_HUMAN	Uncharacterized protein KIAA1257	0.727859	0.166205	3	1	n/a	0.105094	0.978423						No
O14980	XPO1_HUMAN	Exportin-1	0.728128	0.228949	45	2	Yes	5.3e-10	9.27578						Yes	Q6P5F9	Yes	Yes	3	1	4	XPO1, CRM1	Xpo1, Crm1	17ODYA	ABE
O43809	CPSF5_HUMAN	Cleavage and polyadenylation specificity factor subunit 5	0.728295	0.195698	10	2	No	0.00231608	2.63525	1.15125	0.226516	7	1	n/a	No
Q15084	PDIA6_HUMAN	Protein disulfide-isomerase A6	0.728493	0.252817	79	2	Yes	1.07e-14	13.9699	1.0838	0.167485	133	2	Yes	Yes	Q922R8	Yes	Yes	1	3	4	PDIA6, ERP5, P5, TXNDC7	Pdia6, Txndc7	17ODYA	ABE, 17ODYA
Q9P0L0	VAPA_HUMAN	Vesicle-associated membrane protein-associated protein A	0.733175	0.093984	35	2	Yes	9.84e-18	17.0071	0.716745	0.430253	15	2	No	Yes	Q9WV55	Yes	No	3	0	3	VAPA, VAP33		17ODYA
Q9NX20	RM16_HUMAN	39S ribosomal protein L16, mitochondrial	0.73328	0.157061	5	1	n/a	0.0191487	1.71786						No
Q9NTJ5	SAC1_HUMAN	Phosphatidylinositide phosphatase SAC1	0.735201	0.236404	44	2	Yes	3.55e-09	8.44984						Yes	Q9EP69	Yes	Yes	2	2	4	SACM1L, KIAA0851	Sacm1l, Kiaa0851, Sac1	17ODYA	ABE, 17ODYA
Q9NVI7	ATD3A_HUMAN	ATPase family AAA domain-containing protein 3A	0.736945	0.220091	28	1	n/a	9.04e-07	6.04387						Yes	-	Yes	No	1	0	1	ATAD3A		ABE
P00367	DHE3_HUMAN	Glutamate dehydrogenase 1, mitochondrial	0.737051	0.150455	190	2	Yes	2.26e-59	58.6466	5.2282	1.3006	406	2	Yes	Yes	P26443	Yes	Yes	2	3	5	GLUD1, GLUD	Glud1, Glud	17ODYA	ABE, 17ODYA
O95602	RPA1_HUMAN	DNA-directed RNA polymerase I subunit RPA1	0.73855	0.251404	3	1	n/a	0.213456	0.670692						No
Q8NI36	WDR36_HUMAN	WD repeat-containing protein 36	0.739122	0.58764	7	1	n/a	0.284671	0.545656						No
O43681	ASNA_HUMAN	ATPase ASNA1	0.740094	0.0471316	4	1	n/a	0.00159647	2.79684						Yes	O54984	Yes	No	1	0	1	ASNA1, ARSA, TRC40		17ODYA
P25445	TNR6_HUMAN	Tumor necrosis factor receptor superfamily member 6	0.742702	0.131678	30	2	Yes	2.11e-11	10.6765						Yes	P25446	Yes	Yes	3	0	3	FAS, APT1, FAS1, TNFRSF6	Fas, Apt1, Tnfrsf6	ABE, 17ODYA
Q9UBM7	DHCR7_HUMAN	7-dehydrocholesterol reductase	0.746362	0.0919507	4	1	n/a	0.0117295	1.93072	0.734624	0.0618912	3	1	n/a	Yes	O88455	Yes	No	1	0	1	DHCR7, D7SR		17ODYA
Q9HD45	TM9S3_HUMAN	Transmembrane 9 superfamily member 3	0.746888	0.132608	13	1	n/a	1.69e-05	4.77119						Yes	Q9ET30	Yes	No	1	0	1	TM9SF3, SMBP, UNQ245/PRO282		17ODYA
P62937	PPIA_HUMAN	Peptidyl-prolyl cis-trans isomerase A	0.748931	0.18447	113	2	No	2.65e-27	26.5759	2.65179	0.612834	279	2	Yes	Yes	P17742	Yes	Yes	5	1	6	PPIA, CYPA	Ppia	ABE, 17ODYA	17ODYA
O60488	ACSL4_HUMAN	Long-chain-fatty-acid--CoA ligase 4	0.749098	0.319156	130	2	Yes	3.23e-15	14.4911	0.523839	0.180512	39	2	No	Yes	Q9QUJ7	Yes	No	3	0	3	ACSL4, ACS4, FACL4, LACS4		ABE, 17ODYA
P49448	DHE4_HUMAN	Glutamate dehydrogenase 2, mitochondrial	0.749191	0.114865	109	2	Yes	7.18e-43	42.1439	5.19001	1.22049	249	2	Yes	Yes	-	Yes	No	1	0	1	GLUD2, GLUDP1		17ODYA
Q8IXI1	MIRO2_HUMAN	Mitochondrial Rho GTPase 2	0.749427	0.0278411	3	1	n/a	0.00408988	2.38829						Yes	Q8JZN7	Yes	No	1	0	1	RHOT2, ARHT2, C16orf39		ABE
Q96HW7	INT4_HUMAN	Integrator complex subunit 4	0.750945	0.54397	4	2	No	0.456491	0.340568						No
Q9Y3B4	SF3B6_HUMAN	Splicing factor 3B subunit 6	0.753074	0.256896	8	1	n/a	0.0298235	1.52544	0.487423	0.0846854	6	1	n/a	No
Q96AE4	FUBP1_HUMAN	Far upstream element-binding protein 1	0.753426	0.234385	27	2	Yes	1.12e-05	4.95053	0.767009	0.155769	50	2	Yes	Yes	Q91WJ8	Yes	No	1	0	1	FUBP1		17ODYA
P04156	PRIO_HUMAN	Major prion protein	0.753894	0.103688	16	2	Yes	1.77e-07	6.75205						No
Q12906	ILF3_HUMAN	Interleukin enhancer-binding factor 3	0.753957	0.144474	256	2	Yes	2.35e-77	76.6293	0.880901	0.131568	69	2	Yes	Yes	Q9Z1X4	Yes	No	1	0	1	ILF3, DRBF, MPHOSPH4, NF90		17ODYA
Q14980	NUMA1_HUMAN	Nuclear mitotic apparatus protein 1	0.75402	0.306518	4	1	n/a	0.206838	0.684369						Yes	-	Yes	No	1	0	1	NMP22, NUMA1, NUMA		ABE
Q9H936	GHC1_HUMAN	Mitochondrial glutamate carrier 1	0.754098	0.198064	9	1	n/a	0.00583297	2.23411						Yes	Q9D6M3	Yes	Yes	1	1	2	SLC25A22, GC1	Slc25a22, Gc1	17ODYA	ABE
Q9H1K4	GHC2_HUMAN	Mitochondrial glutamate carrier 2	0.754098	0.198064	9	1	n/a	0.00583297	2.23411						No
Q9BQ67	GRWD1_HUMAN	Glutamate-rich WD repeat-containing protein 1	0.75803	0.250344	7	1	n/a	0.0430677	1.36585						No
P19338	NUCL_HUMAN	Nucleolin	0.75886	0.19493	858	2	Yes	5.28e-175	174.277	0.519429	0.124356	328	2	Yes	Yes	P09405	Yes	Yes	2	2	4	NCL	Ncl, Nuc	17ODYA	17ODYA
Q9ULV4	COR1C_HUMAN	Coronin-1C	0.760204	0.189459	73	2	Yes	1.16e-16	15.9341	1.08777	0.079237	18	2	Yes	Yes	Q9WUM4	Yes	Yes	1	2	3	CORO1C, CRNN4, CRN2	Coro1c	17ODYA	ABE, 17ODYA
Q9Y6I9	TX264_HUMAN	Testis-expressed sequence 264 protein	0.761077	0.156552	4	1	n/a	0.0553272	1.25706						No
Q9Y5M8	SRPRB_HUMAN	Signal recognition particle receptor subunit beta	0.761294	0.16124	49	2	Yes	1e-13	12.9999	0.761105	0.0425589	21	2	Yes	Yes	P47758	Yes	Yes	2	3	5	SRPRB, PSEC0230	Srprb	17ODYA	17ODYA
Q7Z2W4	ZCCHV_HUMAN	Zinc finger CCCH-type antiviral protein 1	0.766473	0.161449	10	1	n/a	0.00133912	2.87318						No
Q6RW13	ATRAP_HUMAN	Type-1 angiotensin II receptor-associated protein	0.766945	0.368987	6	2	No	0.196743	0.7061	1.2861	0.132213	4	1	n/a	No
P51572	BAP31_HUMAN	B-cell receptor-associated protein 31	0.767251	0.166883	72	2	Yes	2.29e-18	17.64						Yes	Q61335	Yes	Yes	1	2	3	BCAP31, BAP31, DXS1357E	Bcap31, Bap31	17ODYA	17ODYA
O75915	PRAF3_HUMAN	PRA1 family protein 3	0.767902	0.127591	29	2	Yes	2.21e-10	9.65653						Yes	Q8R5J9	Yes	No	4	0	4	ARL6IP5, DERP11, JWA, PRA2, PRAF3, HSPC127		ABE, 17ODYA
O43402	EMC8_HUMAN	ER membrane protein complex subunit 8	0.770574	0.00571511	3	1	n/a	0.00020678	3.68449						Yes	O70378	No	Yes	0	2	2		Emc8, Cox4al, Cox4nb, Noc4		ABE, 17ODYA
P27797	CALR_HUMAN	Calreticulin	0.77176	0.183334	53	2	Yes	3.3e-12	11.4812	1.07167	0.210125	198	2	Yes	Yes	P14211	Yes	Yes	1	2	3	CALR, CRTC	Calr	17ODYA	ABE
P50395	GDIB_HUMAN	Rab GDP dissociation inhibitor beta	0.7743	0.0670881	4	1	n/a	0.00670228	2.17378	3.06667	0.905576	96	2	Yes	Yes	Q61598	Yes	Yes	2	4	6	GDI2, RABGDIB	Gdi2, Gdi3	17ODYA	ABE, 17ODYA
P11142	HSP7C_HUMAN	Heat shock cognate 71 kDa protein	0.774587	0.173077	394	2	Yes	1.01e-86	85.9957	1.01284	0.162206	689	2	Yes	Yes	P63017	Yes	Yes	3	3	6	HSPA8, HSC70, HSP73, HSPA10	Hspa8, Hsc70, Hsc73	17ODYA	ABE, 17ODYA
Q13085	ACACA_HUMAN	Acetyl-CoA carboxylase 1	0.774621	0.442928	19	1	n/a	0.0396603	1.40164						Yes	Q5SWU9	Yes	Yes	1	1	2	ACACA, ACAC, ACC1, ACCA	Acaca, Acac, Gm738	17ODYA	ABE
Q92542	NICA_HUMAN	Nicastrin	0.775347	0.14456	60	2	Yes	2.07e-17	16.6834						Yes	P57716	Yes	Yes	7	4	11	NCSTN, KIAA0253, UNQ1874/PRO4317	Ncstn	ABE, 17ODYA	17ODYA
Q96E39	RMXL1_HUMAN	RNA binding motif protein, X-linked-like-1	0.77652	0.0460706	5	2	Yes	0.00167664	2.77556	0.62453	0.106737	57	2	No	No
P54652	HSP72_HUMAN	Heat shock-related 70 kDa protein 2	0.778386	0.153895	183	2	Yes	2.7e-46	45.5691	1.01777	0.16366	254	2	Yes	Yes	P17156	No	Yes	0	1	1		Hspa2, Hcp70.2, Hsp70-2		ABE
P16435	NCPR_HUMAN	NADPH--cytochrome P450 reductase	0.778559	0.0985521	68	2	Yes	7.49e-28	27.1255	0.768027	0.141891	18	2	No	Yes	P37040	No	Yes	0	1	1		Por		17ODYA
Q96SI9	STRBP_HUMAN	Spermatid perinuclear RNA-binding protein	0.779913	0.201058	17	2	No	0.000412192	3.3849	1.29973	0.784025	16	2	No	No
P48741	HSP77_HUMAN	Putative heat shock 70 kDa protein 7	0.780832	0.109057	33	2	Yes	9.33e-13	12.0303	1.07518	0.153892	32	2	Yes	No
Q9NYU2	UGGG1_HUMAN	UDP-glucose:glycoprotein glucosyltransferase 1	0.781242	0.137381	182	2	Yes	1.49e-51	50.8272	1.50876	0.674535	13	1	n/a	Yes	Q6P5E4	Yes	Yes	1	1	2	UGGT1, GT, UGCGL1, UGGT, UGT1, UGTR	Uggt1, Gt, Ugcgl1, Uggt, Ugt1, Ugtr	17ODYA	17ODYA
Q14683	SMC1A_HUMAN	Structural maintenance of chromosomes protein 1A	0.781584	0.165375	16	1	n/a	9.2e-05	4.03628						Yes	Q9CU62	Yes	No	2	0	2	SMC1A, DXS423E, KIAA0178, SB1.8, SMC1, SMC1L1		ABE
P09543	CN37_HUMAN	2',3'-cyclic-nucleotide 3'-phosphodiesterase	0.782191	0.229967	27	2	No	4.57e-05	4.34033	0.98373	0.211001	6	1	n/a	Yes	P16330	Yes	No	3	0	3	CNP		ABE, 17ODYA
O15372	EIF3H_HUMAN	Eukaryotic translation initiation factor 3 subunit H	0.782561	0.120452	16	1	n/a	2.97e-06	5.52715	1.17754	0.153186	9	1	n/a	Yes	Q91WK2	Yes	Yes	4	1	5	EIF3H, EIF3S3	Eif3h, Eif3s3	ABE, 17ODYA	17ODYA
Q9NX63	MIC19_HUMAN	MICOS complex subunit MIC19	0.783098	0.140256	27	2	Yes	2.17e-08	7.66427	0.909759	0.142363	42	2	Yes	Yes	Q9CRB9	Yes	Yes	3	1	4	MIC19, CHCHD3, MINOS3	Mic19, Chchd3	17ODYA	17ODYA
P18031	PTN1_HUMAN	Tyrosine-protein phosphatase non-receptor type 1	0.784376	0.252291	37	2	Yes	8.79e-06	5.05585						Yes	P35821	Yes	Yes	1	1	2	PTPN1, PTP1B	Ptpn1	17ODYA	ABE
P33527	MRP1_HUMAN	Multidrug resistance-associated protein 1	0.784954	0.0223389	7	1	n/a	2.41e-07	6.61731						Yes	O35379	Yes	Yes	1	1	2	ABCC1, MRP, MRP1	Abcc1, Abcc1a, Abcc1b, Mdrap, Mrp	17ODYA	17ODYA
Q92928	RAB1C_HUMAN	Putative Ras-related protein Rab-1C	0.786477	0.187471	106	2	Yes	9.66e-21	20.015	1.09055	0.16031	37	2	Yes	Yes	-	Yes	No	2	0	2	RAB1C		ABE, 17ODYA
Q92945	FUBP2_HUMAN	Far upstream element-binding protein 2	0.787021	0.200807	69	2	Yes	8.38e-13	12.0769	0.771931	0.169275	72	2	Yes	Yes	Q3U0V1	Yes	No	2	0	2	KHSRP, FUBP2		ABE, 17ODYA
Q5SSJ5	HP1B3_HUMAN	Heterochromatin protein 1-binding protein 3	0.788124	0.119268	45	2	Yes	3.25e-15	14.488	1.75999	0.333046	24	2	Yes	Yes	Q3TEA8	Yes	No	2	0	2	HP1BP3		17ODYA
P17066	HSP76_HUMAN	Heat shock 70 kDa protein 6	0.788402	0.124013	52	2	Yes	9.62e-17	16.017	1.0959	0.25132	79	2	Yes	No
P53007	TXTP_HUMAN	Tricarboxylate transport protein, mitochondrial	0.788416	0.0959642	28	2	Yes	7.8e-12	11.1077	1.30819	0.11971	13	2	Yes	Yes	Q8JZU2	Yes	Yes	2	1	3	SLC25A1, SLC20A3	Slc25a1, mCG_131850	ABE, 17ODYA	ABE
Q9HC07	TM165_HUMAN	Transmembrane protein 165	0.791874	0.0720814	26	2	Yes	1.63e-13	12.7882						No
P61009	SPCS3_HUMAN	Signal peptidase complex subunit 3	0.793873	0.27091	6	1	n/a	0.121385	0.915835						Yes	Q9D365	Yes	Yes	1	1	2	SPCS3, SPC22, UNQ1841/PRO3567	Spcs3, Spc22	17ODYA	17ODYA
P21281	VATB2_HUMAN	V-type proton ATPase subunit B, brain isoform	0.793917	0.124064	7	2	Yes	0.00705576	2.15146						Yes	P62814	No	Yes	0	1	1		Atp6v1b2, Atp6b2, Vat2		ABE
O15400	STX7_HUMAN	Syntaxin-7	0.794152	0.138532	89	2	Yes	4.91e-24	23.3092						Yes	O70439	Yes	Yes	8	5	13	STX7	Stx7, Syn7	ABE, 17ODYA	ABE, 17ODYA
O75844	FACE1_HUMAN	CAAX prenyl protease 1 homolog	0.794781	0.125292	44	2	Yes	8.91e-14	13.0503	0.68062	0.189753	4	1	n/a	Yes	Q80W54	Yes	Yes	2	1	3	ZMPSTE24, FACE1, STE24	Zmpste24, Face1	ABE, 17ODYA	17ODYA
Q9NQA5	TRPV5_HUMAN	Transient receptor potential cation channel subfamily V member 5	0.795457	0.128346	15	1	n/a	2.43e-05	4.61525						No
P11279	LAMP1_HUMAN	Lysosome-associated membrane glycoprotein 1	0.798871	0.240967	5	1	n/a	0.135395	0.868398	1.27484	0.143753	15	2	Yes	Yes	P11438	Yes	No	3	0	3	LAMP1		ABE, 17ODYA
Q14739	LBR_HUMAN	Lamin-B receptor	0.800729	0.115002	41	2	Yes	1.24e-13	12.9051						Yes	Q3U9G9	Yes	Yes	1	2	3	LBR	Lbr	17ODYA	17ODYA
Q9Y673	ALG5_HUMAN	Dolichyl-phosphate beta-glucosyltransferase	0.802508	0.144411	5	1	n/a	0.0377331	1.42328						No
P30101	PDIA3_HUMAN	Protein disulfide-isomerase A3	0.80422	0.0990125	142	2	Yes	1.44e-50	49.8423	1.07346	0.170178	374	2	Yes	Yes	P27773	Yes	Yes	2	2	4	PDIA3, ERP57, ERP60, GRP58	Pdia3, Erp, Erp60, Grp58	17ODYA	ABE, 17ODYA
Q8WY22	BRI3B_HUMAN	BRI3-binding protein	0.805105	0.628225	3	1	n/a	0.64482	0.190562						Yes	Q8BXV2	No	Yes	0	3	3		Bri3bp		ABE, 17ODYA
Q02978	M2OM_HUMAN	Mitochondrial 2-oxoglutarate/malate carrier protein	0.806013	0.227732	14	2	No	0.00781562	2.10704						Yes	Q9CR62	Yes	Yes	3	2	5	SLC25A11, SLC20A4	Slc25a11	17ODYA	ABE
Q9H0U4	RAB1B_HUMAN	Ras-related protein Rab-1B	0.806363	0.206269	117	2	Yes	1.11e-17	16.9543	1.09981	0.179753	42	2	Yes	Yes	Q9D1G1	Yes	Yes	6	2	8	RAB1B	Rab1b	ABE, 17ODYA	ABE, 17ODYA
P50416	CPT1A_HUMAN	Carnitine O-palmitoyltransferase 1, liver isoform	0.806594	0.0573558	30	2	Yes	3.24e-17	16.4897						Yes	P97742	Yes	Yes	4	1	5	CPT1A, CPT1	Cpt1a, Cpt-1, Cpt1	ABE, 17ODYA	17ODYA
P61026	RAB10_HUMAN	Ras-related protein Rab-10	0.806815	0.175834	36	2	Yes	1.48e-07	6.82922	0.905702	0.177363	10	2	Yes	Yes	P61027	Yes	Yes	5	2	7	RAB10	Rab10	ABE, 17ODYA	ABE, 17ODYA
P38606	VATA_HUMAN	V-type proton ATPase catalytic subunit A	0.808755	0.106389	16	1	n/a	3.12e-06	5.50553						Yes	P50516	Yes	Yes	2	3	5	ATP6V1A, ATP6A1, ATP6V1A1, VPP2	Atp6v1a, Atp6a1, Atp6a2, Atp6v1a1	ABE, 17ODYA	ABE, 17ODYA
Q9UI12	VATH_HUMAN	V-type proton ATPase subunit H	0.810457	0.217646	15	2	Yes	0.00499582	2.30139						Yes	Q8BVE3	Yes	Yes	1	1	2	ATP6V1H, CGI-11	Atp6v1h	17ODYA	ABE
Q5T2N8	ATD3C_HUMAN	ATPase family AAA domain-containing protein 3C	0.811846	0.171435	7	1	n/a	0.0272004	1.56543						No
Q8N163	CCAR2_HUMAN	Cell cycle and apoptosis regulator protein 2	0.812779	0.0565966	16	1	n/a	1.12e-09	8.94908						Yes	Q8VDP4	Yes	No	1	0	1	KIAA1967, DBC1, CCAR2		17ODYA
P48449	ERG7_HUMAN	Lanosterol synthase	0.815184	0.153283	84	2	Yes	6.51e-18	17.1867						Yes	Q8BLN5	Yes	Yes	1	2	3	LSS, OSC	Lss	17ODYA	ABE, 17ODYA
Q86T03	TM55B_HUMAN	Type 1 phosphatidylinositol 4,5-bisphosphate 4-phosphatase	0.819459	0.194825	5	1	n/a	0.106972	0.970732						Yes	Q3TWL2	Yes	Yes	7	3	10	TMEM55B, C14orf9	Tmem55b	ABE, 17ODYA	ABE, 17ODYA
P14649	MYL6B_HUMAN	Myosin light chain 6B	0.819679	0.154139	8	2	No	0.0162278	1.78974	3.65781	0.224721	30	2	Yes	No
P61158	ARP3_HUMAN	Actin-related protein 3	0.822638	0.0907672	5	1	n/a	0.0119741	1.92176	1.78405	0.236763	45	2	Yes	Yes	Q99JY9	Yes	Yes	1	2	3	ACTR3, ARP3	Actr3, Arp3	17ODYA	ABE, 17ODYA
Q13492	PICAL_HUMAN	Phosphatidylinositol-binding clathrin assembly protein	0.824234	0.208966	7	1	n/a	0.0676924	1.16946						Yes	Q7M6Y3	Yes	Yes	1	1	2	PICALM, CALM	Picalm, Calm, Fit1	17ODYA	ABE
Q13243	SRSF5_HUMAN	Serine/arginine-rich splicing factor 5	0.826946	0.158235	35	2	Yes	2.43e-07	6.61359						No
Q86WV6	STING_HUMAN	Stimulator of interferon genes protein	0.828168	0.04355	18	2	Yes	1.46e-11	10.8362						Yes	Q3TBT3	No	Yes	0	2	2		Tmem173, Eris, Mita, Mpys, Sting		17ODYA
Q8NC56	LEMD2_HUMAN	LEM domain-containing protein 2	0.828815	0.327229	5	1	n/a	0.307041	0.512804						Yes	Q6DVA0	Yes	No	1	0	1	LEMD2		17ODYA
Q9UI47	CTNA3_HUMAN	Catenin alpha-3	0.829264	0.557759	7	1	n/a	0.448922	0.347829						No
P62826	RAN_HUMAN	GTP-binding nuclear protein Ran	0.829281	0.182569	10	1	n/a	0.016037	1.79488	1.38916	0.139067	102	2	Yes	Yes	P62827	Yes	Yes	5	2	7	RAN, ARA24, OK/SW-cl.81	Ran, Rasl2-8	ABE, 17ODYA	ABE, 17ODYA
Q9NSD9	SYFB_HUMAN	Phenylalanine--tRNA ligase beta subunit	0.830136	0.436123	4	1	n/a	0.492796	0.307332						Yes	Q9WUA2	Yes	No	2	0	2	FARSB, FARSLB, FRSB, HSPC173		17ODYA
Q15067	ACOX1_HUMAN	Peroxisomal acyl-coenzyme A oxidase 1	0.833343	0.148246	17	2	Yes	0.00032363	3.48995						Yes	Q9R0H0	Yes	Yes	1	1	2	ACOX1, ACOX	Acox1, Acox, Paox	17ODYA	ABE
Q8TD10	MIPO1_HUMAN	Mirror-image polydactyly gene 1 protein	0.833499	0.238218	7	2	No	0.123672	0.90773						No
Q92544	TM9S4_HUMAN	Transmembrane 9 superfamily member 4	0.835349	0.00709114	3	1	n/a	0.000617705	3.20922						Yes	Q8BH24	Yes	No	1	0	1	TM9SF4, KIAA0255		17ODYA
Q15738	NSDHL_HUMAN	Sterol-4-alpha-carboxylate 3-dehydrogenase, decarboxylating	0.837273	0.236686	26	2	Yes	0.00181661	2.74074	0.982027	0.170332	35	2	Yes	Yes	Q9R1J0	No	Yes	0	1	1		Nsdhl		17ODYA
Q01082	SPTB2_HUMAN	Spectrin beta chain, non-erythrocytic 1	0.838161	0.242738	596	2	Yes	1.57e-49	48.8029	1.197	0.355073	72	2	Yes	Yes	Q62261	Yes	Yes	2	3	5	SPTBN1, SPTB2	Sptbn1, Elf, Spnb-2, Spnb2, Sptb2	17ODYA	ABE, 17ODYA
P61006	RAB8A_HUMAN	Ras-related protein Rab-8A	0.839201	0.191354	34	2	Yes	2.66e-05	4.57544						Yes	P55258	Yes	No	4	0	4	RAB8A, MEL, RAB8		ABE, 17ODYA
O00303	EIF3F_HUMAN	Eukaryotic translation initiation factor 3 subunit F	0.841535	0.130295	16	1	n/a	0.000206017	3.6861	1.04592	0.328329	15	1	n/a	Yes	Q9DCH4	Yes	Yes	1	2	3	EIF3F, EIF3S5	Eif3f, Eif3s5	17ODYA	ABE, 17ODYA
P83881	RL36A_HUMAN	60S ribosomal protein L36a	0.841553	0.122888	5	2	No	0.0633693	1.19812	1.97706	0.0727029	11	2	Yes	No
P05026	AT1B1_HUMAN	Sodium/potassium-transporting ATPase subunit beta-1	0.842135	0.156468	14	2	Yes	0.00264718	2.57722						Yes	P14094	No	Yes	0	1	1		Atp1b1, Atp4b		ABE
O00559	RCAS1_HUMAN	Receptor-binding cancer antigen expressed on SiSo cells	0.845884	0.0887013	29	2	Yes	5.8e-10	9.23672						Yes	Q9D0V7	Yes	Yes	4	5	9	EBAG9, RCAS1	Ebag9, Rcas1	ABE, 17ODYA	ABE, 17ODYA
Q96DI7	SNR40_HUMAN	U5 small nuclear ribonucleoprotein 40 kDa protein	0.846451	0.316836	3	1	n/a	0.489588	0.310169						No
P63241	IF5A1_HUMAN	Eukaryotic translation initiation factor 5A-1	0.846521	0.165995	30	2	Yes	2.33e-05	4.63328	1.40418	0.261577	134	2	Yes	Yes	P63242	Yes	Yes	5	1	6	EIF5A	Eif5a	ABE, 17ODYA	17ODYA
Q16698	DECR_HUMAN	2,4-dienoyl-CoA reductase, mitochondrial	0.847315	0.177453	125	2	Yes	1.13e-16	15.9477	1.12597	0.255589	122	2	Yes	Yes	Q9CQ62	Yes	No	3	0	3	SDR18C1, DECR1, DECR		ABE, 17ODYA
O00148	DX39A_HUMAN	ATP-dependent RNA helicase DDX39A	0.848842	0.106981	32	2	Yes	6.38e-09	8.19491	0.731811	0.107715	82	2	Yes	Yes	Q8VDW0	No	Yes	0	1	1		Ddx39a, Ddx39		17ODYA
P49327	FAS_HUMAN	Fatty acid synthase	0.849197	0.143496	240	2	Yes	1.48e-40	39.83	1.91714	0.313305	502	2	Yes	Yes	P19096	Yes	Yes	7	2	9	FASN, FAS	Fasn	ABE, 17ODYA	ABE
P61586	RHOA_HUMAN	Transforming protein RhoA	0.8496	0.334325	5	1	n/a	0.371367	0.430197	1.41981	0.433002	44	2	Yes	Yes	Q9QUI0	Yes	Yes	3	3	6	RHOA, ARH12, ARHA, RHO12	Rhoa, Arha, Arha2	ABE, 17ODYA	17ODYA
P62745	RHOB_HUMAN	Rho-related GTP-binding protein RhoB	0.8496	0.334325	5	1	n/a	0.371367	0.430197						Yes	P62746	Yes	Yes	4	2	6	RHOB, ARH6, ARHB	Rhob, Arhb	ABE, 17ODYA	17ODYA
P08134	RHOC_HUMAN	Rho-related GTP-binding protein RhoC	0.8496	0.334325	5	1	n/a	0.371367	0.430197	1.49057	0.240821	25	2	Yes	Yes	Q62159	Yes	No	2	0	2	RHOC, ARH9, ARHC		ABE
P02545	LMNA_HUMAN	Prelamin-A/C	0.851324	0.179211	229	2	Yes	8.38e-28	27.0767	1.33642	0.231164	459	2	Yes	Yes	P48678	Yes	Yes	1	1	2	LMNA, LMN1	Lmna, Lmn1	17ODYA	17ODYA
Q9Y4K1	AIM1_HUMAN	Absent in melanoma 1 protein	0.85246	0.129201	17	1	n/a	0.000236771	3.62567						No
P42166	LAP2A_HUMAN	Lamina-associated polypeptide 2, isoform alpha	0.854203	0.197184	31	2	No	0.000291081	3.53599	0.49851	0.103769	37	2	Yes	No
P57088	TMM33_HUMAN	Transmembrane protein 33	0.855568	0.0704725	2	2	No	#NUM!							Yes	Q9CR67	Yes	Yes	1	2	3	TMEM33, DB83	Tmem33, Db83	17ODYA	ABE, 17ODYA
Q01085	TIAR_HUMAN	Nucleolysin TIAR	0.857051	0.207414	3	1	n/a	0.354976	0.449801	0.631524	0.177539	6	1	n/a	No
A0FGR8	ESYT2_HUMAN	Extended synaptotagmin-2	0.858649	0.179272	31	2	Yes	0.000137539	3.86157						Yes	Q3TZZ7	Yes	No	3	0	3	ESYT2, FAM62B, KIAA1228		17ODYA
Q9UGP8	SEC63_HUMAN	Translocation protein SEC63 homolog	0.858694	0.231149	34	2	Yes	0.00116896	2.9322						No
P37268	FDFT_HUMAN	Squalene synthase	0.859969	0.27417	81	2	Yes	1.6e-05	4.79454	0.309867	0.0480632	6	2	Yes	Yes	P53798	Yes	No	1	0	1	FDFT1		17ODYA
Q9Y2Q3	GSTK1_HUMAN	Glutathione S-transferase kappa 1	0.861237	0.386901	23	2	No	0.100132	0.999428	0.701088	0.0797934	7	1	n/a	Yes	Q9DCM2	Yes	No	1	0	1	GSTK1, HDCMD47P		17ODYA
O15269	SPTC1_HUMAN	Serine palmitoyltransferase 1	0.861967	0.182307	22	2	Yes	0.00200221	2.69849						Yes	O35704	Yes	No	2	0	2	SPTLC1, LCB1		ABE
Q9Y5B9	SP16H_HUMAN	FACT complex subunit SPT16	0.86276	0.138908	111	2	Yes	4.94e-18	17.3058	0.584667	0.433276	5	1	n/a	Yes	Q920B9	Yes	No	1	0	1	SUPT16H, FACT140, FACTP140		17ODYA
Q02880	TOP2B_HUMAN	DNA topoisomerase 2-beta	0.862903	0.244876	24	1	n/a	0.0115945	1.93575						No
O95758	PTBP3_HUMAN	Polypyrimidine tract-binding protein 3	0.864365	0.156463	20	1	n/a	0.00101512	2.99348						No
Q92841	DDX17_HUMAN	Probable ATP-dependent RNA helicase DDX17	0.86561	0.215323	135	2	Yes	3.04e-11	10.5172	0.680789	0.164373	116	2	Yes	Yes	Q501J6	Yes	No	2	0	2	DDX17		17ODYA
P05198	IF2A_HUMAN	Eukaryotic translation initiation factor 2 subunit 1	0.866532	0.232173	67	2	Yes	1.37e-05	4.86365	1.42978	0.349442	6	1	n/a	Yes	Q6ZWX6	Yes	Yes	2	2	4	EIF2S1, EIF2A	Eif2s1, Eif2a	17ODYA	ABE, 17ODYA
P46060	RAGP1_HUMAN	Ran GTPase-activating protein 1	0.866947	0.0644529	3	1	n/a	0.0700951	1.15431						Yes	P46061	Yes	Yes	1	2	3	RANGAP1, KIAA1835, SD	Rangap1, Fug1	17ODYA	17ODYA
P51149	RAB7A_HUMAN	Ras-related protein Rab-7a	0.867465	0.153227	79	2	Yes	4.05e-11	10.3927	0.783321	0.097319	34	2	Yes	Yes	P51150	Yes	Yes	2	2	4	RAB7A, RAB7	Rab7a, Rab7	17ODYA	ABE, 17ODYA
P62258	1433E_HUMAN	14-3-3 protein epsilon	0.867686	0.208035	35	2	No	0.000656294	3.1829	2.20345	0.473463	131	2	Yes	Yes	P62259	Yes	Yes	4	5	9	YWHAE	05, Ywhae	ABE, 17ODYA	ABE, 17ODYA
Q7Z406	MYH14_HUMAN	Myosin-14	0.870953	0.271933	29	1	n/a	0.016319	1.78731	3.71441	1.76466	18	2	No	Yes	Q6URW6	Yes	No	1	0	1	MYH14, KIAA2034, FP17425		17ODYA
P51809	VAMP7_HUMAN	Vesicle-associated membrane protein 7	0.871486	0.191138	16	1	n/a	0.016811	1.77441						Yes	P70280	Yes	Yes	7	4	11	VAMP7, SYBL1	Vamp7, Sybl1	ABE, 17ODYA	ABE, 17ODYA
Q08945	SSRP1_HUMAN	FACT complex subunit SSRP1	0.871636	0.217079	128	2	Yes	6.55e-10	9.18401	0.764609	0.220905	15	2	Yes	Yes	Q08943	No	Yes	0	1	1		Ssrp1		17ODYA
O43752	STX6_HUMAN	Syntaxin-6	0.872535	0.106039	17	1	n/a	0.000142965	3.84477						Yes	Q9JKK1	Yes	Yes	10	4	14	STX6	Stx6	ABE, 17ODYA	ABE, 17ODYA
P16401	H15_HUMAN	Histone H1.5	0.873649	0.108251	19	1	n/a	7.68e-05	4.11453	0.639249	0.111103	62	2	Yes	No
P04406	G3P_HUMAN	Glyceraldehyde-3-phosphate dehydrogenase	0.875748	0.244408	168	2	Yes	5.6e-10	9.25194	3.5458	0.897861	514	2	Yes	Yes	P16858	Yes	Yes	4	2	6	GAPDH, GAPD, CDABP0047, OK/SW-cl.12	Gapdh, Gapd	ABE, 17ODYA	ABE, 17ODYA
Q14315	FLNC_HUMAN	Filamin-C	0.87627	0.310779	12	1	n/a	0.195242	0.709426	1.30339	0.48475	34	2	Yes	Yes	Q8VHX6	Yes	No	1	0	1	FLNC, ABPL, FLN2		17ODYA
Q96CS3	FAF2_HUMAN	FAS-associated factor 2	0.877634	0.0907473	27	2	Yes	2.41e-07	6.61782						No
P51659	DHB4_HUMAN	Peroxisomal multifunctional enzyme type 2	0.877738	0.242065	166	2	Yes	8.87e-10	9.05184	0.442271	0.0636805	26	2	Yes	Yes	P51660	Yes	Yes	1	1	2	SDR8C1, HSD17B4, EDH17B4	Hsd17b4, Edh17b4	17ODYA	ABE
Q9Y2H5	PKHA6_HUMAN	Pleckstrin homology domain-containing family A member 6	0.877825	0.0185701	5	1	n/a	0.000124243	3.90573						No
Q14318	FKBP8_HUMAN	Peptidyl-prolyl cis-trans isomerase FKBP8	0.878916	0.202493	27	2	Yes	0.00466121	2.3315						Yes	O35465	Yes	Yes	1	2	3	FKBP8, FKBP38	Fkbp8, Fkbp38, Sam11	17ODYA	ABE, 17ODYA
P62273	RS29_HUMAN	40S ribosomal protein S29	0.87897	0.140186	27	1	n/a	0.00013049	3.88442	1.44597	0.106308	25	2	Yes	Yes	P62274	Yes	No	1	0	1	RPS29		17ODYA
Q5JNZ5	RS26L_HUMAN	Putative 40S ribosomal protein S26-like 1	0.880778	0.0388359	3	1	n/a	0.0335975	1.47369	1.52698	0.391898	22	2	No	No
Q9UM00	TMCO1_HUMAN	Transmembrane and coiled-coil domain-containing protein 1	0.882958	0.461216	3	1	n/a	0.703204	0.152919						Yes	Q921L3	No	Yes	0	1	1		Tmco1		17ODYA
P12268	IMDH2_HUMAN	Inosine-5'-monophosphate dehydrogenase 2	0.883782	0.124357	39	2	Yes	1.05e-06	5.98041						Yes	P24547	Yes	Yes	2	1	3	IMPDH2, IMPD2	Impdh2	17ODYA	17ODYA
Q15149	PLEC_HUMAN	Plectin	0.88891	0.253063	4006	2	Yes	1.61e-155	154.794	2.06832	0.372519	1985	2	Yes	Yes	Q9QXS1	Yes	Yes	1	2	3	PLEC, PLEC1	Plec, Plec1	ABE	ABE, 17ODYA
O15126	SCAM1_HUMAN	Secretory carrier-associated membrane protein 1	0.891359	0.0976525	61	2	Yes	3.78e-12	11.4226						Yes	Q8K021	Yes	Yes	8	7	15	SCAMP1, SCAMP	Scamp1	ABE, 17ODYA	ABE, 17ODYA
Q92526	TCPW_HUMAN	T-complex protein 1 subunit zeta-2	0.891371	0.101595	15	2	Yes	0.0011603	2.93543						No
P63104	1433Z_HUMAN	14-3-3 protein zeta/delta	0.894547	0.225722	44	2	Yes	0.00345928	2.46101	2.37672	0.552216	298	2	Yes	Yes	P63101	Yes	Yes	3	2	5	YWHAZ	Ywhaz	ABE, 17ODYA	ABE, 17ODYA
Q9NZN4	EHD2_HUMAN	EH domain-containing protein 2	0.896013	0.153072	22	2	Yes	0.00463853	2.33362	2.28985	0.343902	61	2	Yes	Yes	Q8BH64	No	Yes	0	2	2		Ehd2		ABE, 17ODYA
Q9C075	K1C23_HUMAN	Keratin, type I cytoskeletal 23	0.901463	0.427043	29	2	No	0.224704	0.648389	0.847018	0.754642	8	2	No	No
Q92930	RAB8B_HUMAN	Ras-related protein Rab-8B	0.902332	0.128622	23	2	Yes	0.00152525	2.81666						Yes	P61028	Yes	No	1	0	1	RAB8B		ABE
P59190	RAB15_HUMAN	Ras-related protein Rab-15	0.902332	0.128622	23	2	Yes	0.00152525	2.81666						No
P62820	RAB1A_HUMAN	Ras-related protein Rab-1A	0.902488	0.158943	119	2	Yes	7.98e-10	9.09804	1.07784	0.17994	65	2	Yes	Yes	P62821	Yes	Yes	4	1	5	RAB1A, RAB1	Rab1A, Rab1	ABE, 17ODYA	ABE
P04083	ANXA1_HUMAN	Annexin A1	0.906417	0.291781	399	2	No	4.22e-10	9.37495	2.42712	0.500992	147	2	Yes	Yes	P10107	Yes	No	2	0	2	ANXA1, ANX1, LPC1		17ODYA
P47897	SYQ_HUMAN	Glutamine--tRNA ligase	0.907339	0.215638	3	1	n/a	0.534279	0.272232						No
O00571	DDX3X_HUMAN	ATP-dependent RNA helicase DDX3X	0.909687	0.177476	194	2	Yes	2.53e-11	10.5971	0.930026	0.272663	90	2	Yes	Yes	Q62167	Yes	Yes	2	1	3	DDX3X, DBX, DDX3	Ddx3x, D1Pas1-rs2, Ddx3, Dead3, Erh	17ODYA	17ODYA
P41091	IF2G_HUMAN	Eukaryotic translation initiation factor 2 subunit 3	0.910882	0.330739	38	2	Yes	0.105397	0.977172	1.22889	0.186662	14	2	Yes	Yes	Q9Z0N1	Yes	Yes	2	1	3	EIF2S3, EIF2G	Eif2s3x	ABE, 17ODYA	17ODYA
Q2VIR3	IF2GL_HUMAN	Putative eukaryotic translation initiation factor 2 subunit 3-like protein	0.910882	0.330739	38	2	Yes	0.105397	0.977172	1.55659	0.871042	13	2	No	Yes	-	Yes	No	1	0	1	EIF2S3L		17ODYA
Q6NZI2	PTRF_HUMAN	Polymerase I and transcript release factor	0.912845	0.240364	31	2	Yes	0.0528351	1.27708	1.13458	0.313735	95	2	Yes	No
Q8N4V1	MMGT1_HUMAN	Membrane magnesium transporter 1	0.915231	0.333666	5	1	n/a	0.60035	0.221596						No
Q6IS14	IF5AL_HUMAN	Eukaryotic translation initiation factor 5A-1-like	0.916197	0.0341877	3	1	n/a	0.0512483	1.29032	1.43227	0.297343	112	2	Yes	Yes	-	Yes	No	1	0	1	EIF5AL1		17ODYA
P49755	TMEDA_HUMAN	Transmembrane emp24 domain-containing protein 10	0.916315	0.169745	88	2	Yes	1.31e-05	4.88196						Yes	Q9D1D4	Yes	Yes	2	1	3	TMED10, TMP21	Tmed10, Tmp21	ABE, 17ODYA	17ODYA
P00330	ADH1_YEAST	Alcohol dehydrogenase 1	0.916887	0.619291	6	2	No	0.758845	0.119847						No
P27695	APEX1_HUMAN	DNA-(apurinic or apyrimidinic site) lyase	0.918711	0.201362	12	2	Yes	0.192217	0.716208	2.24754	1.12837	28	2	Yes	Yes	P28352	Yes	Yes	2	1	3	APEX1, APE, APE1, APEX, APX, HAP1, REF1	Apex1, Ape, Apex, Ref1	17ODYA	17ODYA
Q6UW68	TM205_HUMAN	Transmembrane protein 205	0.921877	0.142023	39	2	Yes	0.0014762	2.83086						Yes	Q91XE8	Yes	No	1	0	1	TMEM205, UNQ501/PRO1018		17ODYA
P83916	CBX1_HUMAN	Chromobox protein homolog 1	0.923217	0.137701	8	1	n/a	0.158766	0.799242						Yes	P83917	Yes	No	1	0	1	CBX1, CBX		17ODYA
Q13185	CBX3_HUMAN	Chromobox protein homolog 3	0.923217	0.137701	8	1	n/a	0.158766	0.799242	0.875525	0.197015	38	2	Yes	Yes	P23198	Yes	No	1	0	1	CBX3		17ODYA
O60763	USO1_HUMAN	General vesicular transport factor p115	0.923994	0.140252	18	2	Yes	0.0353018	1.4522						Yes	Q9Z1Z0	Yes	Yes	1	1	2	USO1, VDP	Uso1, Vdp	17ODYA	17ODYA
P50995	ANX11_HUMAN	Annexin A11	0.92472	0.0389428	6	2	Yes	0.00907017	2.04238						Yes	P97384	Yes	No	1	0	1	ANXA11, ANX11		17ODYA
Q8N228	SCML4_HUMAN	Sex comb on midleg-like protein 4	0.925583	0.0641691	5	1	n/a	0.0604807	1.21838						No
Q96NU1	SAM11_HUMAN	Sterile alpha motif domain-containing protein 11	0.925583	0.0641691	5	1	n/a	0.0604807	1.21838						No
Q9UL25	RAB21_HUMAN	Ras-related protein Rab-21	0.925943	0.361779	3	1	n/a	0.756818	0.121009						Yes	P35282	Yes	No	1	0	1	RAB21, KIAA0118		17ODYA
Q15005	SPCS2_HUMAN	Signal peptidase complex subunit 2	0.926003	0.23768	14	2	Yes	0.2667	0.573977						Yes	Q9CYN2	Yes	Yes	1	3	4	SPCS2, KIAA0102, SPC25	Spcs2, Spc25	17ODYA	ABE, 17ODYA
Q6IAA8	LTOR1_HUMAN	Ragulator complex protein LAMTOR1	0.92706	0.154249	130	2	Yes	3.25e-07	6.48817						Yes	Q9CQ22	Yes	Yes	10	5	15	LAMTOR1, C11orf59, PDRO, PP7157	Lamtor1, 2400001E08Rik	ABE, 17ODYA	ABE, 17ODYA
Q9H3N1	TMX1_HUMAN	Thioredoxin-related transmembrane protein 1	0.92709	0.171491	48	2	Yes	0.00504402	2.29722	0.819545	0.223741	14	2	Yes	Yes	Q8VBT0	Yes	Yes	12	7	19	TMX1, TMX, TXNDC, TXNDC1, PSEC0085, UNQ235/PRO268	Tmx1, Txndc, Txndc1	ABE, 17ODYA	ABE, 17ODYA
Q9H3M7	TXNIP_HUMAN	Thioredoxin-interacting protein	0.927241	0.256974	3	1	n/a	0.672367	0.172393						No
O15523	DDX3Y_HUMAN	ATP-dependent RNA helicase DDX3Y	0.928526	0.195816	110	2	Yes	0.000216782	3.66398	0.83257	0.210981	54	2	Yes	Yes	Q62095	Yes	No	1	0	1	DDX3Y, DBY		17ODYA
Q9UQ80	PA2G4_HUMAN	Proliferation-associated protein 2G4	0.929393	0.225814	46	2	Yes	0.0396207	1.40208	1.27558	0.227988	87	2	Yes	Yes	P50580	Yes	Yes	2	2	4	PA2G4, EBP1	Pa2g4, Ebp1, Plfap	17ODYA	ABE, 17ODYA
Q13838	DX39B_HUMAN	Spliceosome RNA helicase DDX39B	0.9305	0.145365	80	2	Yes	5.33e-05	4.27298	0.76414	0.115229	107	2	Yes	Yes	Q9Z1N5	Yes	Yes	1	2	3	DDX39B, BAT1, UAP56	Ddx39b, Bat1, Bat1a, Uap56	17ODYA	ABE, 17ODYA
Q969X1	LFG3_HUMAN	Protein lifeguard 3	0.930646	0.18533	14	2	Yes	0.186774	0.728683						Yes	Q8BJZ3	Yes	No	2	0	2	TMBIM1, LFG3, RECS1, PP1201, PSEC0158		ABE, 17ODYA
P46781	RS9_HUMAN	40S ribosomal protein S9	0.931167	0.200245	22	2	Yes	0.122565	0.911633	1.261	0.318885	7	2	Yes	Yes	Q6ZWN5	Yes	Yes	5	2	7	RPS9	Rps9	ABE, 17ODYA	ABE, 17ODYA
Q9BVK6	TMED9_HUMAN	Transmembrane emp24 domain-containing protein 9	0.931857	0.28827	43	2	Yes	0.128809	0.890053	1.31539	0.143999	24	2	Yes	No
P10620	MGST1_HUMAN	Microsomal glutathione S-transferase 1	0.932918	0.15381	19	2	Yes	0.0743824	1.12853	1.6032	0.123334	22	2	Yes	Yes	Q91VS7	Yes	No	1	0	1	MGST1, GST12, MGST		17ODYA
P37108	SRP14_HUMAN	Signal recognition particle 14 kDa protein	0.934664	0.184595	22	2	Yes	0.112486	0.948901	0.699466	0.0404792	18	2	Yes	No
P62263	RS14_HUMAN	40S ribosomal protein S14	0.936697	0.297498	34	2	Yes	0.223721	0.650293	1.3373	0.344928	70	2	Yes	Yes	P62264	Yes	No	1	0	1	RPS14, PRO2640		17ODYA
Q7Z5G4	GOGA7_HUMAN	Golgin subfamily A member 7	0.937292	0.0542934	6	1	n/a	0.0367128	1.43518						Yes	Q91W53	Yes	Yes	10	2	12	GOLGA7, GCP16, HDCKB03P, HSPC041	Golga7, MNCb-1213	ABE, 17ODYA	ABE, 17ODYA
Q9H9S3	S61A2_HUMAN	Protein transport protein Sec61 subunit alpha isoform 2	0.937818	0.227675	6	1	n/a	0.533141	0.273158						No
Q9P003	CNIH4_HUMAN	Protein cornichon homolog 4	0.939061	0.0221572	3	1	n/a	0.041354	1.38348						No
Q9BY44	EIF2A_HUMAN	Eukaryotic translation initiation factor 2A	0.940799	0.245147	33	2	Yes	0.175257	0.756325						No
Q9C0H2	TTYH3_HUMAN	Protein tweety homolog 3	0.941537	0.0212834	4	1	n/a	0.0118672	1.92565						Yes	Q6P5F7	Yes	Yes	6	3	9	TTYH3, KIAA1691	Ttyh3, Kiaa1691	ABE, 17ODYA	17ODYA
P40227	TCPZ_HUMAN	T-complex protein 1 subunit zeta	0.942159	0.18374	182	2	Yes	3.47e-05	4.45956	0.928428	0.120495	103	2	Yes	Yes	P80317	Yes	Yes	3	2	5	CCT6A, CCT6, CCTZ	Cct6a, Cct6, Cctz, Cctz1	ABE, 17ODYA	ABE, 17ODYA
Q13011	ECH1_HUMAN	Delta(3,5)-Delta(2,4)-dienoyl-CoA isomerase, mitochondrial	0.945626	0.196979	3	1	n/a	0.679727	0.167665	0.910239	0.104614	57	2	Yes	Yes	O35459	Yes	No	1	0	1	ECH1		17ODYA
P62829	RL23_HUMAN	60S ribosomal protein L23	0.949654	0.286209	77	2	Yes	0.126904	0.896526	1.61075	0.376885	68	2	Yes	Yes	P62830	Yes	No	3	0	3	RPL23		17ODYA
P60903	S10AA_HUMAN	Protein S100-A10	0.950077	0.401105	219	2	Yes	0.0668535	1.17488	2.90603	0.54567	50	2	Yes	No
Q9GZV4	IF5A2_HUMAN	Eukaryotic translation initiation factor 5A-2	0.950536	0.145213	6	1	n/a	0.442098	0.354481	1.47051	0.177487	55	2	Yes	Yes	Q8BGY2	Yes	No	2	0	2	EIF5A2		ABE
Q96AG4	LRC59_HUMAN	Leucine-rich repeat-containing protein 59	0.953558	0.145542	72	2	Yes	0.00850915	2.07011	0.539992	0.0693632	80	2	Yes	Yes	Q922Q8	Yes	Yes	1	3	4	LRRC59, PRO1855	Lrrc59	17ODYA	ABE, 17ODYA
P46783	RS10_HUMAN	40S ribosomal protein S10	0.95445	0.191884	23	2	Yes	0.267759	0.572256	1.49784	0.195659	45	2	Yes	Yes	P63325	Yes	Yes	1	1	2	RPS10	Rps10	17ODYA	17ODYA
Q9Y6M5	ZNT1_HUMAN	Zinc transporter 1	0.95474	0.306737	16	2	No	0.56445	0.248375						Yes	Q60738	Yes	No	4	0	4	SLC30A1, ZNT1		ABE, 17ODYA
P61019	RAB2A_HUMAN	Ras-related protein Rab-2A	0.95685	0.181154	81	2	Yes	0.0351296	1.45433	1.10587	0.350645	26	2	No	Yes	P53994	Yes	Yes	2	2	4	RAB2A, RAB2	Rab2a, Rab2	ABE, 17ODYA	ABE
Q9Y676	RT18B_HUMAN	28S ribosomal protein S18b, mitochondrial	0.958736	1.09936	6	1	n/a	0.930316	0.0313697						Yes	Q99N84	Yes	No	1	0	1	MRPS18B, C6orf14, HSPC183, PTD017		ABE
Q9Y3E5	PTH2_HUMAN	Peptidyl-tRNA hydrolase 2, mitochondrial	0.959572	0.16726	59	2	Yes	0.0685387	1.16406						Yes	Q8R2Y8	Yes	Yes	7	1	8	PTRH2, BIT1, PTH2, CGI-147	Ptrh2, Pth2	ABE, 17ODYA	17ODYA
O75976	CBPD_HUMAN	Carboxypeptidase D	0.959796	0.268114	124	2	Yes	0.0975243	1.01089						Yes	O89001	Yes	Yes	5	3	8	CPD	Cpd	ABE, 17ODYA	17ODYA
O43660	PLRG1_HUMAN	Pleiotropic regulator 1	0.961579	0.204373	7	1	n/a	0.636617	0.196122						No
P23284	PPIB_HUMAN	Peptidyl-prolyl cis-trans isomerase B	0.962826	0.18478	97	2	Yes	0.0504397	1.29723	1.13009	0.211588	233	2	Yes	Yes	P24369	Yes	No	2	0	2	PPIB, CYPB		17ODYA
P48643	TCPE_HUMAN	T-complex protein 1 subunit epsilon	0.966569	0.22467	187	2	Yes	0.0432981	1.36353	0.899289	0.186099	142	2	Yes	Yes	P80316	Yes	Yes	4	2	6	CCT5, CCTE, KIAA0098	Cct5, Ccte, Kiaa0098	ABE, 17ODYA	ABE, 17ODYA
P38159	RBMX_HUMAN	RNA-binding motif protein, X chromosome	0.968514	0.336562	3	1	n/a	0.886169	0.0524836	0.634508	0.12398	90	2	Yes	No
Q04206	TF65_HUMAN	Transcription factor p65	0.968598	0.32563	3	1	n/a	0.882706	0.0541841						No
P11388	TOP2A_HUMAN	DNA topoisomerase 2-alpha	0.97013	0.0984499	10	1	n/a	0.362406	0.440805						No
P78371	TCPB_HUMAN	T-complex protein 1 subunit beta	0.971273	0.207254	225	2	Yes	0.0387509	1.41172	0.959872	0.168848	164	2	Yes	Yes	P80314	Yes	Yes	3	3	6	CCT2, 99D8.1, CCTB	Cct2, Cctb	17ODYA	ABE, 17ODYA
P27708	PYR1_HUMAN	CAD protein	0.971777	0.112289	11	1	n/a	0.423962	0.372673						Yes	B2RQC6	Yes	Yes	1	1	2	CAD	Cad, mCG_23490	ABE	ABE
P30153	2AAA_HUMAN	Serine/threonine-protein phosphatase 2A 65 kDa regulatory subunit A alpha isoform	0.972312	0.151163	20	2	Yes	0.423417	0.373232	1.90805	0.524834	13	2	No	Yes	Q76MZ3	Yes	Yes	3	4	7	PPP2R1A	Ppp2r1a	ABE, 17ODYA	ABE, 17ODYA
Q15155	NOMO1_HUMAN	Nodal modulator 1	0.972356	0.212714	70	2	Yes	0.280738	0.551699						No
O15020	SPTN2_HUMAN	Spectrin beta chain, non-erythrocytic 2	0.974095	0.373047	5	1	n/a	0.884124	0.0534868						No
Q58FG1	HS904_HUMAN	Putative heat shock protein HSP 90-alpha A4	0.975387	0.0529784	3	1	n/a	0.505455	0.296317	1.72793	0.110959	19	2	Yes	No
Q15758	AAAT_HUMAN	Neutral amino acid transporter B(0)	0.975415	0.235934	64	2	Yes	0.407696	0.389663						Yes	P51912	Yes	Yes	10	4	14	SLC1A5, ASCT2, M7V1, RDR, RDRC	Slc1a5, Aaat, Asct2, Slc1a7	ABE, 17ODYA	17ODYA
P69849	NOMO3_HUMAN	Nodal modulator 3	0.97581	0.216351	65	2	Yes	0.370793	0.430869						No
Q5JPE7	NOMO2_HUMAN	Nodal modulator 2	0.97581	0.216351	65	2	Yes	0.370793	0.430869						No
P29144	TPP2_HUMAN	Tripeptidyl-peptidase 2	0.979838	0.142382	4	1	n/a	0.79543	0.0993982						Yes	Q64514	No	Yes	0	2	2		Tpp2		ABE, 17ODYA
P60842	IF4A1_HUMAN	Eukaryotic initiation factor 4A-I	0.986889	0.352092	101	2	Yes	0.70904	0.149329	1.38758	0.401739	132	2	Yes	Yes	P60843	Yes	Yes	2	2	4	EIF4A1, DDX2A, EIF4A	Eif4a1, Ddx2a, Eif4a	17ODYA	ABE, 17ODYA
P62244	RS15A_HUMAN	40S ribosomal protein S15a	0.987181	0.195357	31	2	Yes	0.717509	0.144173	1.57593	1.51827	27	2	No	Yes	P62245	Yes	No	3	0	3	RPS15A, OK/SW-cl.82		ABE, 17ODYA
P61225	RAP2B_HUMAN	Ras-related protein Rap-2b	0.98759	0.321868	88	2	Yes	0.71848	0.143585						Yes	P61226	Yes	Yes	12	7	19	RAP2B	Rap2b	ABE, 17ODYA	ABE, 17ODYA
Q9H3P7	GCP60_HUMAN	Golgi resident protein GCP60	0.99198	0.159109	28	2	Yes	0.79178	0.101395						No
P49368	TCPG_HUMAN	T-complex protein 1 subunit gamma	0.993013	0.205032	148	2	Yes	0.679054	0.168096	0.952872	0.127243	112	2	Yes	Yes	P80318	Yes	Yes	2	1	3	CCT3, CCTG, TRIC5	Cct3, Cctg	17ODYA	17ODYA
P11021	GRP78_HUMAN	78 kDa glucose-regulated protein	0.995381	0.248476	272	2	Yes	0.759407	0.119525	1.02613	0.154294	481	2	Yes	Yes	P20029	Yes	Yes	2	1	3	HSPA5, GRP78	Hspa5, Grp78	17ODYA	ABE
P14868	SYDC_HUMAN	Aspartate--tRNA ligase, cytoplasmic	0.996237	0.224365	11	2	No	0.956853	0.0191546						Yes	Q922B2	Yes	Yes	1	1	2	DARS, PIG40	Dars	17ODYA	ABE
O60841	IF2P_HUMAN	Eukaryotic translation initiation factor 5B	0.996626	0.283873	70	2	Yes	0.921082	0.0357016						No
P13667	PDIA4_HUMAN	Protein disulfide-isomerase A4	0.999755	0.44105	9	1	n/a	0.998711	0.000560095	0.922513	0.146034	138	2	Yes	Yes	P08003	Yes	Yes	1	2	3	PDIA4, ERP70, ERP72	Pdia4, Cai, Erp72	17ODYA	ABE, 17ODYA
P84098	RL19_HUMAN	60S ribosomal protein L19	1.00012	0.183052	33	2	Yes	0.997123	0.00125143	1.52467	0.193403	25	2	Yes	Yes	P84099	Yes	Yes	1	3	4	RPL19	Rpl19	17ODYA	ABE, 17ODYA
O75531	BAF_HUMAN	Barrier-to-autointegration factor	1.00035	0.333439	18	2	No	0.996527	0.00151093	0.792069	0.205918	61	2	Yes	No
P61981	1433G_HUMAN	14-3-3 protein gamma	1.00051	0.207108	11	2	No	0.993715	0.00273829	2.15715	0.46687	126	2	Yes	Yes	P61982	Yes	Yes	4	2	6	YWHAG	Ywhag	ABE, 17ODYA	ABE, 17ODYA
A6NKF9	GPHRB_HUMAN	Golgi pH regulator B	1.0017	0.246204	30	2	Yes	0.970072	0.0131961						No
B7ZAQ6	GPHRA_HUMAN	Golgi pH regulator A	1.0017	0.246204	30	2	Yes	0.970072	0.0131961						No
P0CG08	GPHRB_HUMAN	Golgi pH regulator B	1.0017	0.246204	30	2	Yes	0.970072	0.0131961						No
Q99832	TCPH_HUMAN	T-complex protein 1 subunit eta	1.00206	0.216413	127	2	Yes	0.914734	0.0387051	1.00254	0.167489	141	2	Yes	Yes	P80313	Yes	Yes	2	2	4	CCT7, CCTH, NIP7-1	Cct7, Ccth	17ODYA	17ODYA
O75071	EFC14_HUMAN	EF-hand calcium-binding domain-containing protein 14	1.00242	0.188792	10	2	No	0.968679	0.0138201						Yes	Q8BGQ6	Yes	No	5	0	5	EFCAB14, KIAA0494		ABE, 17ODYA
P08754	GNAI3_HUMAN	Guanine nucleotide-binding protein G(k) subunit alpha	1.00433	0.315824	155	2	Yes	0.864757	0.063106	0.570743	0.19939	9	2	Yes	Yes	Q9DC51	Yes	Yes	9	7	16	GNAI3	Gnai3	ABE, 17ODYA	ABE, 17ODYA
P46776	RL27A_HUMAN	60S ribosomal protein L27a	1.00465	0.115351	15	2	Yes	0.87845	0.0562829	1.75831	0.414266	24	2	Yes	Yes	P14115	Yes	Yes	1	1	2	RPL27A	Rpl27a	17ODYA	17ODYA
P05556	ITB1_HUMAN	Integrin beta-1	1.00503	0.166435	184	2	Yes	0.68251	0.165891	1.09205	0.196553	267	2	Yes	Yes	P09055	Yes	Yes	1	1	2	ITGB1, FNRB, MDF2, MSK12	Itgb1	17ODYA	17ODYA
P06703	S10A6_HUMAN	Protein S100-A6	1.00537	0.211044	26	2	No	0.897939	0.046753						Yes	P14069	No	Yes	0	1	1		S100a6, Cacy		17ODYA
P46782	RS5_HUMAN	40S ribosomal protein S5	1.00537	0.285087	62	2	Yes	0.882602	0.0542351	1.28342	0.223177	74	2	Yes	Yes	P97461	Yes	Yes	6	1	7	RPS5	Rps5	ABE, 17ODYA	17ODYA
Q92804	RBP56_HUMAN	TATA-binding protein-associated factor 2N	1.00722	0.319726	92	2	Yes	0.829094	0.0813961	0.707071	0.117652	53	2	Yes	Yes	-	Yes	No	1	0	1	TAF15, RBP56, TAF2N		ABE
Q00577	PURA_HUMAN	Transcriptional activator protein Pur-alpha	1.00744	0.293606	7	2	Yes	0.949149	0.0226658						Yes	P42669	No	Yes	0	1	1		Pura		ABE
Q8WUD1	RAB2B_HUMAN	Ras-related protein Rab-2B	1.00747	0.0868526	13	2	Yes	0.762132	0.11797						Yes	P59279	Yes	No	3	0	3	RAB2B		ABE, 17ODYA
Q8NI08	NCOA7_HUMAN	Nuclear receptor coactivator 7	1.00894	0.685045	4	1	n/a	0.980826	0.00840806						No
P61106	RAB14_HUMAN	Ras-related protein Rab-14	1.01276	0.189447	48	2	Yes	0.642927	0.191838	0.776064	0.00264872	6	1	n/a	Yes	Q91V41	Yes	Yes	3	3	6	RAB14	Rab14	ABE, 17ODYA	ABE, 17ODYA
Q96P70	IPO9_HUMAN	Importin-9	1.01278	0.340699	16	1	n/a	0.882688	0.054193						Yes	Q91YE6	No	Yes	0	1	1		Ipo9, Imp9, Ranbp9		17ODYA
O43776	SYNC_HUMAN	Asparagine--tRNA ligase, cytoplasmic	1.01393	0.29987	42	2	Yes	0.764983	0.116348						Yes	Q8BP47	Yes	No	1	0	1	NARS		17ODYA
P17987	TCPA_HUMAN	T-complex protein 1 subunit alpha	1.01409	0.268607	214	2	Yes	0.443868	0.352747	0.961771	0.135744	94	2	Yes	Yes	P11983	Yes	No	4	0	4	TCP1, CCT1, CCTA		ABE, 17ODYA
Q16850	CP51A_HUMAN	Lanosterol 14-alpha demethylase	1.0167	0.220667	14	2	Yes	0.781875	0.106863						Yes	Q8K0C4	Yes	Yes	1	1	2	CYP51A1, CYP51	Cyp51a1, Cyp51	17ODYA	17ODYA
O00159	MYO1C_HUMAN	Unconventional myosin-Ic	1.0177	0.253151	195	2	Yes	0.330045	0.481427	1.23259	0.303054	21	1	n/a	Yes	Q9WTI7	Yes	Yes	1	2	3	MYO1C	Myo1c	17ODYA	ABE, 17ODYA
Q8WUM4	PDC6I_HUMAN	Programmed cell death 6-interacting protein	1.01887	0.120053	14	2	Yes	0.567312	0.246178	3.59435	0.491492	10	1	n/a	Yes	Q9WU78	Yes	Yes	1	2	3	PDCD6IP, AIP1, ALIX, KIAA1375	Pdcd6ip, Aip1, Alix	17ODYA	ABE, 17ODYA
P62873	GBB1_HUMAN	Guanine nucleotide-binding protein G(I)/G(S)/G(T) subunit beta-1	1.02041	0.193657	47	2	Yes	0.47374	0.32446	0.758648	0.22464	58	2	Yes	Yes	P62874	Yes	Yes	2	2	4	GNB1	Gnb1	17ODYA	ABE, 17ODYA
P16070	CD44_HUMAN	CD44 antigen	1.0226	0.354877	135	2	Yes	0.460679	0.336601	0.511646	0.115079	13	1	n/a	Yes	P15379	Yes	Yes	8	6	14	CD44, LHR, MDU2, MDU3, MIC4	Cd44, Ly-24	ABE, 17ODYA	ABE, 17ODYA
P21964	COMT_HUMAN	Catechol O-methyltransferase	1.02359	0.042631	6	1	n/a	0.233342	0.632008	1.72571	0.114178	10	2	Yes	Yes	O88587	Yes	No	4	0	4	COMT		ABE, 17ODYA
O95674	CDS2_HUMAN	Phosphatidate cytidylyltransferase 2	1.0253	0.0179004	4	1	n/a	0.0663841	1.17794						Yes	Q99L43	Yes	Yes	1	2	3	CDS2	Cds2	17ODYA	ABE, 17ODYA
Q14240	IF4A2_HUMAN	Eukaryotic initiation factor 4A-II	1.02553	0.354744	76	2	Yes	0.532367	0.273789	1.44167	0.486566	86	2	Yes	Yes	P10630	Yes	No	1	0	1	EIF4A2, DDX2B, EIF4F		17ODYA
P48729	KC1A_HUMAN	Casein kinase I isoform alpha	1.02607	0.77683	3	1	n/a	0.958932	0.0182121						No
Q00765	REEP5_HUMAN	Receptor expression-enhancing protein 5	1.0262	0.171443	27	2	Yes	0.434592	0.361918						Yes	Q60870	Yes	Yes	7	1	8	REEP5, C5orf18, DP1, TB2	Reep5, Dp1	ABE, 17ODYA	17ODYA
P19525	E2AK2_HUMAN	Interferon-induced, double-stranded RNA-activated protein kinase	1.0264	0.429454	7	2	No	0.877145	0.0569284						No
Q14790	CASP8_HUMAN	Caspase-8	1.02803	0.16686	10	1	n/a	0.608073	0.216044						No
P36578	RL4_HUMAN	60S ribosomal protein L4	1.02831	0.2472	154	2	Yes	0.15737	0.803079	1.39673	0.336071	173	2	Yes	Yes	Q9D8E6	Yes	Yes	2	3	5	RPL4, RPL1	Rpl4	ABE, 17ODYA	ABE, 17ODYA
O75489	NDUS3_HUMAN	NADH dehydrogenase [ubiquinone] iron-sulfur protein 3, mitochondrial	1.02919	0.70871	4	1	n/a	0.939545	0.0270825	0.728635	0.0361777	13	2	Yes	Yes	Q9DCT2	No	Yes	0	1	1		Ndufs3		ABE
Q8WVM8	SCFD1_HUMAN	Sec1 family domain-containing protein 1	1.02967	0.165071	18	1	n/a	0.456203	0.340842						No
Q04917	1433F_HUMAN	14-3-3 protein eta	1.03022	0.240968	7	2	No	0.753524	0.122903	1.9689	0.306837	78	2	Yes	Yes	P68510	Yes	Yes	2	1	3	YWHAH, YWHA1	Ywhah	17ODYA	17ODYA
P31947	1433S_HUMAN	14-3-3 protein sigma	1.03022	0.240968	7	2	No	0.753524	0.122903	1.01996	0.742729	142	2	Yes	Yes	O70456	Yes	No	1	0	1	SFN, HME1		17ODYA
P30419	NMT1_HUMAN	Glycylpeptide N-tetradecanoyltransferase 1	1.03063	0.270989	3	1	n/a	0.862879	0.0640501						No
Q13283	G3BP1_HUMAN	Ras GTPase-activating protein-binding protein 1	1.0314	0.274924	23	2	No	0.589658	0.2294	1.23172	0.211534	35	2	Yes	Yes	P97855	No	Yes	0	1	1		G3bp1, G3bp		17ODYA
P62879	GBB2_HUMAN	Guanine nucleotide-binding protein G(I)/G(S)/G(T) subunit beta-2	1.03392	0.17048	37	2	Yes	0.23422	0.630376	0.737152	0.159415	38	2	Yes	Yes	P62880	No	Yes	0	3	3		Gnb2		ABE, 17ODYA
P50990	TCPQ_HUMAN	T-complex protein 1 subunit theta	1.03493	0.219221	116	2	Yes	0.0888448	1.05137	0.908085	0.156819	101	2	Yes	Yes	P42932	Yes	Yes	3	3	6	CCT8, C21orf112, CCTQ, KIAA0002	Cct8, Cctq	ABE, 17ODYA	ABE, 17ODYA
P50991	TCPD_HUMAN	T-complex protein 1 subunit delta	1.03597	0.217671	125	2	Yes	0.0670954	1.17331	0.943719	0.133682	85	2	Yes	Yes	P80315	Yes	Yes	2	3	5	CCT4, CCTD, SRB	Cct4, Cctd	17ODYA	ABE, 17ODYA
O00429	DNM1L_HUMAN	Dynamin-1-like protein	1.03662	0.171236	16	1	n/a	0.405709	0.391785	1.46032	0.12389	10	1	n/a	Yes	Q8K1M6	Yes	No	1	0	1	DNM1L, DLP1, DRP1		17ODYA
Q9Y262	EIF3L_HUMAN	Eukaryotic translation initiation factor 3 subunit L	1.03896	0.282304	88	2	Yes	0.198885	0.701398						Yes	Q8QZY1	Yes	Yes	2	2	4	EIF3L, EIF3EIP, EIF3S6IP, HSPC021, HSPC025, MSTP005	Eif3l, Eif3eip, Eif3s6ip, Paf67	17ODYA	ABE, 17ODYA
P61353	RL27_HUMAN	60S ribosomal protein L27	1.03913	0.163636	44	2	Yes	0.120227	0.92	1.20308	0.315372	39	2	Yes	Yes	P61358	Yes	Yes	2	1	3	RPL27	Rpl27	17ODYA	ABE
P46940	IQGA1_HUMAN	Ras GTPase-activating-like protein IQGAP1	1.04042	0.24374	394	2	Yes	0.00108602	2.96416	2.42905	0.599205	109	2	Yes	Yes	Q9JKF1	Yes	Yes	2	1	3	IQGAP1, KIAA0051	Iqgap1	17ODYA	ABE
P15880	RS2_HUMAN	40S ribosomal protein S2	1.0427	0.25742	112	2	Yes	0.0819696	1.08635	1.47222	0.3877	96	2	Yes	Yes	P25444	Yes	Yes	2	2	4	RPS2, RPS4	Rps2, Llrep3, Rps4	17ODYA	ABE, 17ODYA
Q969V3	NCLN_HUMAN	Nicalin	1.04313	0.252029	17	2	Yes	0.491267	0.308682						Yes	Q8VCM8	Yes	No	3	0	3	NCLN		ABE, 17ODYA
O95864	FADS2_HUMAN	Fatty acid desaturase 2	1.04829	0.131631	11	2	Yes	0.254681	0.594004						Yes	Q9Z0R9	Yes	No	1	0	1	FADS2		17ODYA
P62906	RL10A_HUMAN	60S ribosomal protein L10a	1.05007	0.3048	97	2	Yes	0.108976	0.962671	1.46385	0.349178	63	2	Yes	Yes	P53026	Yes	Yes	4	1	5	RPL10A, NEDD6	Rpl10a, Nedd-6, Nedd6	ABE, 17ODYA	17ODYA
P35268	RL22_HUMAN	60S ribosomal protein L22	1.05443	0.0621138	7	1	n/a	0.0595873	1.22485	1.53105	0.163213	43	2	Yes	Yes	P67984	Yes	No	1	0	1	RPL22		17ODYA
Q8N1G4	LRC47_HUMAN	Leucine-rich repeat-containing protein 47	1.05523	0.156498	3	1	n/a	0.603232	0.219516						Yes	Q505F5	Yes	No	2	0	2	LRRC47, KIAA1185		ABE, 17ODYA
P63220	RS21_HUMAN	40S ribosomal protein S21	1.05565	0.169615	15	2	Yes	0.226121	0.645659	1.38903	0.14598	52	2	Yes	No
P50454	SERPH_HUMAN	Serpin H1	1.057	0.158214	70	2	Yes	0.00362043	2.44124	0.921446	0.180502	130	2	Yes	Yes	P19324	Yes	Yes	2	1	3	SERPINH1, CBP1, CBP2, HSP47, SERPINH2, PIG14	Serpinh1, Cbp1, Hsp47	ABE, 17ODYA	ABE
Q8NC51	PAIRB_HUMAN	Plasminogen activator inhibitor 1 RNA-binding protein	1.05812	0.283006	44	2	Yes	0.180397	0.743771	1.43541	0.234773	91	2	Yes	Yes	Q9CY58	Yes	No	2	0	2	SERBP1, PAIRBP1, CGI-55		17ODYA
P60228	EIF3E_HUMAN	Eukaryotic translation initiation factor 3 subunit E	1.05941	0.351516	80	2	Yes	0.13468	0.870698						Yes	P60229	Yes	Yes	2	1	3	EIF3E, EIF3S6, INT6	Eif3e, Eif3s6, Int6	17ODYA	ABE
Q8NFW8	NEUA_HUMAN	N-acylneuraminate cytidylyltransferase	1.06037	0.0601526	3	1	n/a	0.224286	0.649197						No
O15427	MOT4_HUMAN	Monocarboxylate transporter 4	1.06138	0.10571	36	2	Yes	0.00138075	2.85989						Yes	P57787	Yes	No	4	0	4	SLC16A3, MCT4		ABE, 17ODYA
O75131	CPNE3_HUMAN	Copine-3	1.06182	0.286622	23	2	No	0.312737	0.504821						Yes	Q8BT60	Yes	No	1	0	1	CPNE3, CPN3, KIAA0636		17ODYA
Q6NVV1	R13P3_HUMAN	Putative 60S ribosomal protein L13a protein RPL13AP3	1.06289	0.193476	52	2	Yes	0.0230922	1.63653	1.68533	0.178172	3	1	n/a	No
P62753	RS6_HUMAN	40S ribosomal protein S6	1.06316	0.316665	123	2	Yes	0.0288423	1.53997	1.411	0.364315	51	2	Yes	Yes	P62754	Yes	Yes	3	1	4	RPS6, OK/SW-cl.2	Rps6	ABE, 17ODYA	17ODYA
P46778	RL21_HUMAN	60S ribosomal protein L21	1.06462	0.144503	134	2	Yes	8.22e-07	6.08519	1.36972	0.416409	79	2	Yes	Yes	O09167	Yes	No	2	0	2	RPL21		17ODYA
P62857	RS28_HUMAN	40S ribosomal protein S28	1.0647	0.219011	36	2	Yes	0.0852838	1.06913	1.40823	0.206957	34	2	Yes	No
O94973	AP2A2_HUMAN	AP-2 complex subunit alpha-2	1.06603	0.161909	16	1	n/a	0.123643	0.907831						Yes	P17427	Yes	Yes	3	2	5	AP2A2, ADTAB, CLAPA2, HIP9, HYPJ, KIAA0899	Ap2a2, Adtab	ABE, 17ODYA	ABE, 17ODYA
Q8NEE6	FXL13_HUMAN	F-box/LRR-repeat protein 13	1.06705	0.0471611	3	1	n/a	0.13282	0.876738						No
Q14554	PDIA5_HUMAN	Protein disulfide-isomerase A5	1.06719	0.0161728	4	1	n/a	0.0036525	2.43741						No
P62249	RS16_HUMAN	40S ribosomal protein S16	1.06733	0.236477	64	2	Yes	0.0261946	1.58179	1.3911	0.198601	17	2	Yes	Yes	P14131	Yes	No	4	0	4	RPS16		ABE, 17ODYA
P07942	LAMB1_HUMAN	Laminin subunit beta-1	1.06821	0.229478	36	1	n/a	0.0831983	1.07989						No
Q15323	K1H1_HUMAN	Keratin, type I cuticular Ha1	1.06921	0.188009	22	2	Yes	0.0996477	1.00153	0.711655	0.030817	4	1	n/a	No
P35900	K1C20_HUMAN	Keratin, type I cytoskeletal 20	1.06921	0.188009	22	2	Yes	0.0996477	1.00153						No
P61619	S61A1_HUMAN	Protein transport protein Sec61 subunit alpha isoform 1	1.06946	0.174306	20	2	Yes	0.0915995	1.03811						Yes	P61620	Yes	No	2	0	2	SEC61A1, SEC61A		ABE, 17ODYA
P32969	RL9_HUMAN	60S ribosomal protein L9	1.07121	0.271818	144	2	Yes	0.00203032	2.69243	1.52398	0.252087	107	2	Yes	Yes	P51410	Yes	Yes	4	2	6	RPL9, OK/SW-cl.103;, RPL9P7;, RPL9P8;, RPL9P9	Rpl9	ABE, 17ODYA	ABE, 17ODYA
P62424	RL7A_HUMAN	60S ribosomal protein L7a	1.07215	0.203804	213	2	Yes	5.51e-07	6.25872	1.47744	0.247561	126	2	Yes	Yes	P12970	Yes	Yes	2	2	4	RPL7A, SURF-3, SURF3	Rpl7a, Surf-3, Surf3	ABE, 17ODYA	17ODYA
Q9UHB9	SRP68_HUMAN	Signal recognition particle subunit SRP68	1.07283	0.260863	23	2	Yes	0.194895	0.7102						Yes	Q8BMA6	Yes	Yes	1	1	2	SRP68	Srp68	17ODYA	17ODYA
Q86VR2	F134C_HUMAN	Protein FAM134C	1.07346	0.253784	16	2	Yes	0.266334	0.574573						No
Q07020	RL18_HUMAN	60S ribosomal protein L18	1.0742	0.20862	84	2	Yes	0.0016235	2.78955	1.36625	0.240369	41	2	Yes	Yes	P35980	Yes	Yes	4	1	5	RPL18	Rpl18	ABE, 17ODYA	17ODYA
Q9HAV0	GBB4_HUMAN	Guanine nucleotide-binding protein subunit beta-4	1.07466	0.0891524	23	2	Yes	0.00062485	3.20422	0.7184	0.165149	28	2	Yes	Yes	P29387	No	Yes	0	1	1		Gnb4		ABE
P18077	RL35A_HUMAN	60S ribosomal protein L35a	1.07495	0.35574	11	2	Yes	0.502344	0.298998						Yes	O55142	Yes	No	1	0	1	RPL35A, GIG33		17ODYA
P08708	RS17_HUMAN	40S ribosomal protein S17	1.07757	0.283222	94	2	Yes	0.00933744	2.02977	1.65367	0.350662	35	2	Yes	Yes	P63276	Yes	Yes	3	3	6	RPS17	Rps17	17ODYA	17ODYA
P0CW22	RS17_HUMAN	40S ribosomal protein S17	1.07757	0.283222	94	2	Yes	0.00933744	2.02977	1.65367	0.350662	35	2	Yes	No
P26373	RL13_HUMAN	60S ribosomal protein L13	1.07793	0.146623	19	2	Yes	0.0332479	1.47824	1.58965	0.274485	36	2	Yes	Yes	P47963	Yes	Yes	2	1	3	RPL13, BBC1, OK/SW-cl.46	Rpl13	17ODYA	17ODYA
P31949	S10AB_HUMAN	Protein S100-A11	1.08084	0.261577	66	2	No	0.0145883	1.83599	3.58173	0.731717	153	2	Yes	Yes	P50543	Yes	No	1	0	1	S100A11, MLN70, S100C		17ODYA
O15031	PLXB2_HUMAN	Plexin-B2	1.08151	0.278163	29	2	Yes	0.126215	0.898889						Yes	B2RXS4	Yes	Yes	3	1	4	PLXNB2, KIAA0315	Plxnb2	ABE, 17ODYA	17ODYA
P39023	RL3_HUMAN	60S ribosomal protein L3	1.08339	0.245812	408	2	Yes	2.71e-11	10.5668	1.42752	0.237009	73	2	Yes	Yes	P27659	Yes	Yes	5	5	10	RPL3, OK/SW-cl.32	Rpl3	ABE, 17ODYA	ABE, 17ODYA
Q12907	LMAN2_HUMAN	Vesicular integral-membrane protein VIP36	1.08417	0.217436	24	2	Yes	0.0711243	1.14798	1.60465	0.480998	9	1	n/a	Yes	Q9DBH5	Yes	Yes	1	1	2	LMAN2, C5orf8	Lman2	17ODYA	17ODYA
P40429	RL13A_HUMAN	60S ribosomal protein L13a	1.08453	0.232625	75	2	Yes	0.00238758	2.62204	1.42399	0.14999	6	2	Yes	Yes	P19253	Yes	Yes	3	1	4	RPL13A	Rpl13a, P198, Tstap198-7	ABE, 17ODYA	17ODYA
P08865	RSSA_HUMAN	40S ribosomal protein SA	1.08701	0.17567	49	2	Yes	0.0011347	2.94512	1.35	0.322857	69	2	Yes	Yes	P14206	Yes	Yes	1	1	2	RPSA, LAMBR, LAMR1	Rpsa, Lamr1, P40-8	17ODYA	17ODYA
Q86UE4	LYRIC_HUMAN	Protein LYRIC	1.08918	0.383374	81	2	No	0.0395088	1.40331						Yes	Q80WJ7	Yes	Yes	11	8	19	MTDH, AEG1, LYRIC	Mtdh, Lyric	ABE, 17ODYA	ABE, 17ODYA
Q15365	PCBP1_HUMAN	Poly(rC)-binding protein 1	1.09335	0.321268	24	2	No	0.168607	0.773125	1.40761	0.136438	98	2	Yes	Yes	P60335	Yes	No	2	0	2	PCBP1		17ODYA
P04040	CATA_HUMAN	Catalase	1.09479	0.330431	7	1	n/a	0.476627	0.321822	0.467564	0.0197142	4	1	n/a	Yes	P24270	Yes	Yes	1	1	2	CAT	Cat, Cas-1, Cas1	17ODYA	17ODYA
P47914	RL29_HUMAN	60S ribosomal protein L29	1.09595	0.205251	46	2	Yes	0.00276955	2.55759	1.89904	0.124189	27	2	Yes	Yes	P47915	Yes	Yes	1	2	3	RPL29	Rpl29, Rpl43	17ODYA	17ODYA
P13639	EF2_HUMAN	Elongation factor 2	1.09613	0.302077	144	2	No	0.000199875	3.69924	2.18525	0.529954	310	2	Yes	Yes	P58252	Yes	Yes	4	2	6	EEF2, EF2	Eef2	ABE, 17ODYA	ABE
P27348	1433T_HUMAN	14-3-3 protein theta	1.09845	0.24867	9	2	No	0.273691	0.56274	2.54154	0.826707	119	2	Yes	Yes	P68254	Yes	Yes	4	2	6	YWHAQ	Ywhaq	ABE, 17ODYA	ABE, 17ODYA
P62847	RS24_HUMAN	40S ribosomal protein S24	1.09859	0.231993	29	2	Yes	0.0301609	1.52056	1.499	0.190927	42	2	Yes	Yes	P62849	Yes	No	1	0	1	RPS24		ABE
P62277	RS13_HUMAN	40S ribosomal protein S13	1.09899	0.164029	15	1	n/a	0.0347986	1.45844	1.33576	0.107914	13	2	Yes	Yes	P62301	Yes	Yes	2	1	3	RPS13	Rps13	17ODYA	17ODYA
P63096	GNAI1_HUMAN	Guanine nucleotide-binding protein G(i) subunit alpha-1	1.09938	0.369586	86	2	Yes	0.0146085	1.8354	0.765537	0.00302406	3	1	n/a	Yes	B2RSH2	Yes	Yes	3	3	6	GNAI1, Numa1	Gnai1, Gnai-1	ABE	ABE, 17ODYA
Q14258	TRI25_HUMAN	E3 ubiquitin/ISG15 ligase TRIM25	1.09967	0.065007	5	1	n/a	0.0265716	1.57558						No
Q7Z7H5	TMED4_HUMAN	Transmembrane emp24 domain-containing protein 4	1.10325	0.608621	5	2	No	0.729704	0.136853	1.2725	0.327543	7	2	No	No
Q15041	AR6P1_HUMAN	ADP-ribosylation factor-like protein 6-interacting protein 1	1.10674	0.279491	15	1	n/a	0.16127	0.792445						Yes	Q9JKW0	No	Yes	0	1	1		Arl6ip1, Arl6ip		17ODYA
P18124	RL7_HUMAN	60S ribosomal protein L7	1.10798	0.229875	150	2	Yes	4.87e-08	7.31281	1.55179	0.223785	135	2	Yes	Yes	P14148	Yes	Yes	3	2	5	RPL7	Rpl7	ABE, 17ODYA	ABE, 17ODYA
O43242	PSMD3_HUMAN	26S proteasome non-ATPase regulatory subunit 3	1.10905	0.212407	4	1	n/a	0.380068	0.420139	1.71405	0.283616	3	1	n/a	Yes	P14685	Yes	Yes	1	2	3	PSMD3	Psmd3, P91a, Tstap91a	17ODYA	ABE, 17ODYA
P61313	RL15_HUMAN	60S ribosomal protein L15	1.10946	0.22185	99	2	Yes	3.7e-06	5.43205	1.42289	0.306693	96	2	Yes	Yes	Q9CZM2	Yes	Yes	3	1	4	RPL15, EC45, TCBAP0781	Rpl15	ABE, 17ODYA	ABE
Q53GQ0	DHB12_HUMAN	Very-long-chain 3-oxoacyl-CoA reductase	1.10961	0.143044	53	2	Yes	9.31e-07	6.03112	1.22682	0.204347	38	2	Yes	Yes	O70503	Yes	Yes	1	2	3	SDR12C1, HSD17B12	Hsd17b12, Kik1	17ODYA	17ODYA
P61247	RS3A_HUMAN	40S ribosomal protein S3a	1.11298	0.236527	119	2	Yes	8.18e-07	6.08701	1.26311	0.332869	173	2	Yes	Yes	P97351	Yes	Yes	4	3	7	RPS3A, FTE1, MFTL	Rps3a, Rps3a1	ABE, 17ODYA	ABE, 17ODYA
P07099	HYEP_HUMAN	Epoxide hydrolase 1	1.11427	0.203039	81	2	Yes	2.62e-06	5.58246	3.84692	1.66826	13	1	n/a	Yes	Q9D379	Yes	No	1	0	1	EPHX1, EPHX, EPOX		17ODYA
P49354	FNTA_HUMAN	Protein farnesyltransferase/geranylgeranyltransferase type-1 subunit alpha	1.11513	0.316209	3	1	n/a	0.592744	0.227133						No
P57721	PCBP3_HUMAN	Poly(rC)-binding protein 3	1.11527	0.349018	20	2	No	0.156961	0.804209	1.3637	0.142792	41	2	Yes	No
Q12884	SEPR_HUMAN	Prolyl endopeptidase FAP	1.11641	0.383747	3	1	n/a	0.651729	0.185933						Yes	P97321	Yes	No	1	0	1	FAP		17ODYA
Q16643	DREB_HUMAN	Drebrin	1.11932	0.116572	9	2	Yes	0.0180488	1.74355	1.19387	0.0317472	6	1	n/a	Yes	Q9QXS6	Yes	Yes	2	1	3	DBN1, D0S117E	Dbn1, Drba	ABE	17ODYA
Q9BTU6	P4K2A_HUMAN	Phosphatidylinositol 4-kinase type 2-alpha	1.11962	0.24623	101	2	Yes	4.03e-06	5.3951						Yes	Q2TBE6	Yes	Yes	10	7	17	PI4K2A	Pi4k2a	ABE, 17ODYA	ABE, 17ODYA
P62081	RS7_HUMAN	40S ribosomal protein S7	1.12006	0.240174	69	2	Yes	9.51e-05	4.02197	1.41325	0.36567	95	2	Yes	Yes	P62082	Yes	Yes	1	2	3	RPS7	Rps7	17ODYA	ABE, 17ODYA
Q969Q0	RL36L_HUMAN	60S ribosomal protein L36a-like	1.12069	0.423872	10	1	n/a	0.391368	0.407415	1.97706	0.0727029	11	2	Yes	No
P05455	LA_HUMAN	Lupus La protein	1.1223	0.0991197	3	1	n/a	0.166065	0.779721	2.43568	0.40198	27	2	Yes	Yes	P32067	Yes	No	1	0	1	SSB		17ODYA
Q13347	EIF3I_HUMAN	Eukaryotic translation initiation factor 3 subunit I	1.12279	0.05825	6	2	Yes	0.00668149	2.17513	1.19191	0.00906559	7	2	Yes	Yes	Q9QZD9	Yes	No	1	0	1	EIF3I, EIF3S2, TRIP1		17ODYA
P17980	PRS6A_HUMAN	26S protease regulatory subunit 6A	1.12297	0.254445	5	1	n/a	0.340643	0.467701	1.71334	0.302442	43	2	Yes	Yes	O88685	Yes	No	2	0	2	PSMC3, TBP1		17ODYA
P26640	SYVC_HUMAN	Valine--tRNA ligase	1.12627	0.129498	13	2	Yes	0.00483436	2.31566						Yes	Q9Z1Q9	Yes	Yes	1	2	3	VARS, G7A, VARS2	Vars, Bat6, G7a, Vars2	17ODYA	ABE, 17ODYA
P62269	RS18_HUMAN	40S ribosomal protein S18	1.12711	0.279393	28	2	Yes	0.0234671	1.62954	1.41524	0.219974	46	2	Yes	Yes	P62270	Yes	No	1	0	1	RPS18, D6S218E		17ODYA
P18621	RL17_HUMAN	60S ribosomal protein L17	1.12786	0.229979	150	2	Yes	2.29e-10	9.6399	1.50807	0.145242	50	2	Yes	Yes	Q9CPR4	Yes	Yes	1	2	3	RPL17	Rpl17	17ODYA	17ODYA
P42167	LAP2B_HUMAN	Lamina-associated polypeptide 2, isoforms beta/gamma	1.12804	0.0982284	15	1	n/a	0.000177796	3.75008	0.556581	0.206375	41	2	Yes	Yes	Q61029	Yes	No	1	0	1	TMPO, LAP2		17ODYA
O60884	DNJA2_HUMAN	DnaJ homolog subfamily A member 2	1.12929	0.067986	3	1	n/a	0.0811146	1.0909	1.0095	0.0519794	11	1	n/a	No
P62888	RL30_HUMAN	60S ribosomal protein L30	1.12951	0.151062	48	2	Yes	3.56e-07	6.44797	1.54504	0.251361	74	2	Yes	Yes	P62889	Yes	No	3	0	3	RPL30		ABE, 17ODYA
O76094	SRP72_HUMAN	Signal recognition particle subunit SRP72	1.12969	0.436303	20	2	Yes	0.200334	0.698246						Yes	-	Yes	No	1	0	1	SRP72		17ODYA
P30050	RL12_HUMAN	60S ribosomal protein L12	1.13075	0.223146	90	2	Yes	2.87e-07	6.54207	1.46093	0.248389	89	2	Yes	Yes	P35979	Yes	Yes	6	1	7	RPL12	Rpl12	ABE, 17ODYA	17ODYA
P62701	RS4X_HUMAN	40S ribosomal protein S4, X isoform	1.13166	0.252611	181	2	Yes	4.64e-11	10.3333	1.28625	0.256514	87	2	Yes	Yes	P62702	Yes	Yes	2	3	5	RPS4X, CCG2, RPS4, SCAR	Rps4x, Rps4	17ODYA	ABE, 17ODYA
P62913	RL11_HUMAN	60S ribosomal protein L11	1.13229	0.204239	126	2	Yes	3.53e-11	10.4519	1.59132	0.236431	77	2	Yes	Yes	Q9CXW4	Yes	No	3	0	3	RPL11		ABE, 17ODYA
P62241	RS8_HUMAN	40S ribosomal protein S8	1.13312	0.200047	146	2	Yes	2.98e-13	12.5264	1.39372	0.26992	145	2	Yes	Yes	P62242	Yes	Yes	2	1	3	RPS8, OK/SW-cl.83	Rps8	17ODYA	17ODYA
Q9UHG3	PCYOX_HUMAN	Prenylcysteine oxidase 1	1.13399	0.145357	24	2	Yes	0.000171148	3.76663						Yes	Q9CQF9	Yes	No	1	0	1	PCYOX1, KIAA0908, PCL1, UNQ597/PRO1183		17ODYA
Q9NP72	RAB18_HUMAN	Ras-related protein Rab-18	1.13433	0.227753	26	2	Yes	0.0060965	2.21492						Yes	P35293	Yes	Yes	1	2	3	RAB18	Rab18	ABE	ABE, 17ODYA
Q9BW60	ELOV1_HUMAN	Elongation of very long chain fatty acids protein 1	1.13505	0.130461	17	2	Yes	0.000673558	3.17162						Yes	Q9JLJ5	Yes	Yes	3	1	4	ELOVL1, SSC1, CGI-88	Elovl1, Ssc1	ABE, 17ODYA	17ODYA
P51153	RAB13_HUMAN	Ras-related protein Rab-13	1.13543	0.489264	37	2	Yes	0.101146	0.995053						No
Q13425	SNTB2_HUMAN	Beta-2-syntrophin	1.13602	0.268926	4	1	n/a	0.386243	0.413139						No
P00338	LDHA_HUMAN	L-lactate dehydrogenase A chain	1.1363	0.281877	104	2	Yes	3.18e-06	5.4976	3.90324	0.89186	325	2	Yes	Yes	P06151	Yes	Yes	2	1	3	LDHA, PIG19	Ldha, Ldh-1, Ldh1	17ODYA	ABE
Q15366	PCBP2_HUMAN	Poly(rC)-binding protein 2	1.13934	0.378352	33	2	No	0.0425131	1.37148	1.3363	0.151522	78	2	Yes	Yes	Q61990	Yes	No	2	0	2	PCBP2		17ODYA
P62333	PRS10_HUMAN	26S protease regulatory subunit 10B	1.14065	0.0129904	4	1	n/a	0.000215528	3.6665	1.7965	0.282257	12	2	Yes	Yes	P62334	Yes	Yes	2	1	3	PSMC6, SUG2	Psmc6, Sug2	17ODYA	17ODYA
P46777	RL5_HUMAN	60S ribosomal protein L5	1.14141	0.223469	167	2	Yes	7.34e-14	13.1343	1.46643	0.252221	105	2	Yes	Yes	P47962	Yes	Yes	6	1	7	RPL5, MSTP030	Rpl5	ABE, 17ODYA	17ODYA
P53999	TCP4_HUMAN	Activated RNA polymerase II transcriptional coactivator p15	1.142	0.290674	28	2	No	0.0156978	1.80416						No
P62917	RL8_HUMAN	60S ribosomal protein L8	1.15099	0.332529	98	2	Yes	1.94e-05	4.71112	1.69706	0.433843	63	2	Yes	Yes	P62918	Yes	Yes	3	1	4	RPL8	Rpl8	ABE, 17ODYA	ABE
Q71UM5	RS27L_HUMAN	40S ribosomal protein S27-like	1.15444	0.161015	13	2	Yes	0.00535013	2.27164	1.88217	0.535018	3	1	n/a	Yes	Q6ZWY3	Yes	No	1	0	1	RPS27L		17ODYA
O00560	SDCB1_HUMAN	Syntenin-1	1.15603	0.294597	33	2	Yes	0.00474598	2.32367	3.0686	0.53809	4	1	n/a	No
P56192	SYMC_HUMAN	Methionine--tRNA ligase, cytoplasmic	1.15956	0.174908	35	2	Yes	5.72e-06	5.24274						Yes	Q68FL6	Yes	Yes	3	1	4	MARS	Mars	17ODYA	17ODYA
P62280	RS11_HUMAN	40S ribosomal protein S11	1.16177	0.310305	113	2	Yes	2.04e-07	6.68981	1.34045	0.0988593	35	2	Yes	Yes	P62281	Yes	Yes	6	2	8	RPS11	Rps11	ABE, 17ODYA	17ODYA
P49207	RL34_HUMAN	60S ribosomal protein L34	1.16235	0.193666	55	2	Yes	8.17e-08	7.08803	1.74735	0.232248	10	2	Yes	Yes	Q9D1R9	Yes	No	1	0	1	RPL34		17ODYA
Q9Y3L5	RAP2C_HUMAN	Ras-related protein Rap-2c	1.16288	0.321933	61	2	Yes	0.000210133	3.67751						Yes	Q8BU31	Yes	Yes	11	7	18	RAP2C	Rap2c	ABE, 17ODYA	ABE, 17ODYA
Q96N66	MBOA7_HUMAN	Lysophospholipid acyltransferase 7	1.16418	0.263163	25	2	Yes	0.0048208	2.31688						Yes	Q8CHK3	Yes	No	1	0	1	MBOAT7, BB1, LENG4, OACT7		17ODYA
P63244	GBLP_HUMAN	Guanine nucleotide-binding protein subunit beta-2-like 1	1.16799	0.17915	115	2	Yes	2.24e-17	16.6499	1.4077	0.234822	151	2	Yes	Yes	P68040	Yes	Yes	3	2	5	GNB2L1, HLC7, PIG21	Gnb2l1, Gnb2-rs1	ABE, 17ODYA	ABE, 17ODYA
P08238	HS90B_HUMAN	Heat shock protein HSP 90-beta	1.16827	0.30453	155	2	Yes	1.44e-10	9.84015	1.66412	0.269945	312	2	Yes	Yes	P11499	Yes	Yes	2	1	3	HSP90AB1, HSP90B, HSPC2, HSPCB	Hsp90ab1, Hsp84, Hsp84-1, Hspcb	17ODYA	ABE
A1L0T0	ILVBL_HUMAN	Acetolactate synthase-like protein	1.16869	0.179645	25	2	Yes	9.95e-05	4.00208						Yes	Q8BU33	Yes	No	2	0	2	ILVBL, AHAS		ABE
P60866	RS20_HUMAN	40S ribosomal protein S20	1.16939	0.17498	43	2	Yes	1.38e-07	6.8587						Yes	P60867	Yes	Yes	4	1	5	RPS20	Rps20	ABE, 17ODYA	17ODYA
P50914	RL14_HUMAN	60S ribosomal protein L14	1.17053	0.137968	29	2	Yes	3.83e-07	6.41689	1.38156	0.207333	57	2	Yes	Yes	Q9CR57	Yes	Yes	1	1	2	RPL14	Rpl14	17ODYA	17ODYA
P61513	RL37A_HUMAN	60S ribosomal protein L37a	1.17086	0.311331	33	2	Yes	0.00357862	2.44628	1.62914	0.224604	53	2	Yes	No
Q92901	RL3L_HUMAN	60S ribosomal protein L3-like	1.17123	0.205862	44	2	Yes	1.96e-06	5.70808						Yes	-	Yes	No	1	0	1	RPL3L		ABE
P42677	RS27_HUMAN	40S ribosomal protein S27	1.17305	0.0409347	5	1	n/a	0.00069853	3.15581	1.88217	0.535018	3	1	n/a	Yes	Q6ZWU9	Yes	No	1	0	1	RPS27, MPS1		17ODYA
P62854	RS26_HUMAN	40S ribosomal protein S26	1.1731	0.292529	40	2	Yes	0.000601336	3.22088	1.47994	0.378509	24	2	No	Yes	P62855	No	Yes	0	1	1		Rps26		17ODYA
P07947	YES_HUMAN	Tyrosine-protein kinase Yes	1.17325	0.180999	4	1	n/a	0.151473	0.819664						Yes	Q04736	Yes	Yes	6	4	10	YES1, YES	Yes1, Yes	ABE, 17ODYA	ABE, 17ODYA
Q8NBX0	SCPDL_HUMAN	Saccharopine dehydrogenase-like oxidoreductase	1.17506	0.058405	4	1	n/a	0.00929583	2.03171						Yes	Q8R127	Yes	Yes	2	1	3	SCCPDH, CGI-49	Sccpdh	17ODYA	ABE
P23634	AT2B4_HUMAN	Plasma membrane calcium-transporting ATPase 4	1.17587	0.364984	125	2	Yes	3.5e-07	6.45624						Yes	Q6Q477	Yes	No	4	0	4	ATP2B4, ATP2B2, MXRA1, Atp2b4		ABE, 17ODYA
P62266	RS23_HUMAN	40S ribosomal protein S23	1.17897	0.228337	101	2	Yes	4.4e-12	11.3567	1.6283	0.124709	14	1	n/a	Yes	P62267	Yes	No	3	0	3	RPS23		ABE, 17ODYA
Q9H361	PABP3_HUMAN	Polyadenylate-binding protein 3	1.17931	0.0365505	3	1	n/a	0.0135683	1.86747	1.2835	0.224514	24	2	Yes	Yes	-	Yes	No	1	0	1	PABPC3, PABP3, PABPL3		17ODYA
P41252	SYIC_HUMAN	Isoleucine--tRNA ligase, cytoplasmic	1.18304	0.34463	39	2	Yes	0.00204847	2.68857	1.41954	0.300002	26	2	Yes	Yes	Q8BU30	Yes	Yes	5	1	6	IARS	Iars	ABE, 17ODYA	17ODYA
O95782	AP2A1_HUMAN	AP-2 complex subunit alpha-1	1.18392	0.215902	51	2	Yes	1.74e-07	6.75942						Yes	P17426	Yes	Yes	1	3	4	AP2A1, ADTAA, CLAPA1	Ap2a1, Adtaa, Clapa1	17ODYA	ABE, 17ODYA
P68366	TBA4A_HUMAN	Tubulin alpha-4A chain	1.18454	0.441117	117	2	Yes	1.48e-05	4.82994	4.88935	1.19536	180	2	Yes	No
P53396	ACLY_HUMAN	ATP-citrate synthase	1.18479	0.353739	51	2	Yes	0.00049654	3.30405	2.83851	0.559534	99	2	Yes	Yes	Q91V92	Yes	Yes	2	2	4	ACLY	Acly	17ODYA	ABE, 17ODYA
O94905	ERLN2_HUMAN	Erlin-2	1.18528	0.259108	52	2	Yes	4.32e-06	5.36428						No
Q3ZCM7	TBB8_HUMAN	Tubulin beta-8 chain	1.18933	0.110191	23	2	Yes	5.11e-08	7.29159	5.04196	1.03517	82	2	Yes	Yes	-	Yes	No	2	0	2	TUBB8		ABE, 17ODYA
P23396	RS3_HUMAN	40S ribosomal protein S3	1.19074	0.229164	208	2	Yes	1.63e-25	24.789	1.48645	0.2978	51	2	Yes	Yes	P62908	Yes	Yes	2	3	5	RPS3, OK/SW-cl.26	Rps3	17ODYA	ABE, 17ODYA
P18462	1A25_HUMAN	HLA class I histocompatibility antigen, A-25 alpha chain	1.19418	0.449294	39	2	Yes	0.0104189	1.98218						Yes	-	Yes	No	1	0	1	HLA-A, HLAA		ABE
P30453	1A34_HUMAN	HLA class I histocompatibility antigen, A-34 alpha chain	1.19418	0.449294	39	2	Yes	0.0104189	1.98218						Yes	-	Yes	No	1	0	1	HLA-A, HLAA		ABE
P10316	1A69_HUMAN	HLA class I histocompatibility antigen, A-69 alpha chain	1.19418	0.449294	39	2	Yes	0.0104189	1.98218						Yes	-	Yes	No	1	0	1	HLA-A, HLAA		ABE
P01891	1A68_HUMAN	HLA class I histocompatibility antigen, A-68 alpha chain	1.19418	0.449294	39	2	Yes	0.0104189	1.98218						No
P16190	1A33_HUMAN	HLA class I histocompatibility antigen, A-33 alpha chain	1.19418	0.449294	39	2	Yes	0.0104189	1.98218						No
P30450	1A26_HUMAN	HLA class I histocompatibility antigen, A-26 alpha chain	1.19418	0.449294	39	2	Yes	0.0104189	1.98218						No
P30457	1A66_HUMAN	HLA class I histocompatibility antigen, A-66 alpha chain	1.19418	0.449294	39	2	Yes	0.0104189	1.98218						No
Q02878	RL6_HUMAN	60S ribosomal protein L6	1.19444	0.315363	174	2	Yes	7.98e-14	13.0979	1.55915	0.312738	83	2	Yes	Yes	P47911	Yes	Yes	2	4	6	RPL6, TXREB1	Rpl6	17ODYA	ABE, 17ODYA
O75477	ERLN1_HUMAN	Erlin-1	1.19454	0.324281	53	2	Yes	6.17e-05	4.21						No
Q6A162	K1C40_HUMAN	Keratin, type I cytoskeletal 40	1.1961	0.155586	16	1	n/a	0.00014613	3.83526						Yes	Q6IFX3	Yes	No	1	0	1	KRT40, KA36		ABE
Q14525	KT33B_HUMAN	Keratin, type I cuticular Ha3-II	1.1961	0.155586	16	1	n/a	0.00014613	3.83526	0.711655	0.030817	4	1	n/a	No
O76009	KT33A_HUMAN	Keratin, type I cuticular Ha3-I	1.1961	0.155586	16	1	n/a	0.00014613	3.83526						No
O76011	KRT34_HUMAN	Keratin, type I cuticular Ha4	1.1961	0.155586	16	1	n/a	0.00014613	3.83526						No
P29401	TKT_HUMAN	Transketolase	1.1984	0.215139	26	2	Yes	8.86e-05	4.05278	4.20454	0.915689	269	2	Yes	Yes	P40142	No	Yes	0	1	1		Tkt		17ODYA
P10114	RAP2A_HUMAN	Ras-related protein Rap-2a	1.19877	0.310228	51	2	Yes	3.26e-05	4.4869						Yes	Q80ZJ1	Yes	Yes	7	6	13	RAP2A	Rap2a	ABE, 17ODYA	ABE, 17ODYA
P31946	1433B_HUMAN	14-3-3 protein beta/alpha	1.20049	0.230947	17	1	n/a	0.00250634	2.60096	2.53675	0.684925	162	2	Yes	Yes	Q9CQV8	Yes	Yes	4	2	6	YWHAB	Ywhab, R, N	ABE, 17ODYA	ABE, 17ODYA
Q4VXU2	PAP1L_HUMAN	Polyadenylate-binding protein 1-like	1.20091	0.418524	8	1	n/a	0.216672	0.664197	1.3604	0.0385758	10	2	Yes	No
Q03113	GNA12_HUMAN	Guanine nucleotide-binding protein subunit alpha-12	1.20159	0.110352	20	2	Yes	1.81e-07	6.74119						Yes	P27600	Yes	Yes	4	0	4	GNA12	Gna12, Gna-12	ABE
Q9BTV4	TMM43_HUMAN	Transmembrane protein 43	1.20378	0.139796	74	2	Yes	8.79e-20	19.0558						Yes	Q9DBS1	Yes	Yes	1	1	2	TMEM43, UNQ2564/PRO6244	Tmem43	17ODYA	17ODYA
O94923	GLCE_HUMAN	D-glucuronyl C5-epimerase	1.20491	0.261571	3	1	n/a	0.30767	0.511914						Yes	Q9EPS3	Yes	No	1	0	1	GLCE, KIAA0836		ABE
P27635	RL10_HUMAN	60S ribosomal protein L10	1.2051	0.207668	100	2	Yes	2.24e-16	15.6492	1.70692	0.242951	51	2	Yes	Yes	Q6ZWV3	Yes	Yes	3	2	5	RPL10, DXS648E, QM	Rpl10, Qm	ABE, 17ODYA	ABE, 17ODYA
Q12893	TM115_HUMAN	Transmembrane protein 115	1.20532	0.144068	3	1	n/a	0.132317	0.878385						Yes	Q9WUH1	Yes	Yes	2	3	5	TMEM115, PL6, LUCA11.2	Tmem115, Pl6	17ODYA	ABE, 17ODYA
Q58FF7	H90B3_HUMAN	Putative heat shock protein HSP 90-beta-3	1.20959	0.241201	11	1	n/a	0.0163296	1.78702	1.67501	0.192604	64	2	Yes	No
P05386	RLA1_HUMAN	60S acidic ribosomal protein P1	1.20995	0.368165	57	2	Yes	6.92e-05	4.16012	1.5927	0.586408	85	2	Yes	Yes	P47955	Yes	No	1	0	1	RPLP1, RRP1		17ODYA
P04844	RPN2_HUMAN	Dolichyl-diphosphooligosaccharide--protein glycosyltransferase subunit 2	1.21001	0.193659	165	2	Yes	1.49e-29	28.8277	1.21032	0.165187	83	2	Yes	Yes	Q9DBG6	Yes	Yes	4	3	7	RPN2	Rpn2	ABE, 17ODYA	ABE, 17ODYA
Q01518	CAP1_HUMAN	Adenylyl cyclase-associated protein 1	1.21008	0.232667	24	2	Yes	0.000214492	3.66859	3.4957	0.808972	51	2	Yes	Yes	P40124	Yes	Yes	4	3	7	CAP1, CAP	Cap1, Cap	ABE, 17ODYA	ABE, 17ODYA
P35637	FUS_HUMAN	RNA-binding protein FUS	1.21104	0.338384	149	2	No	2.99e-12	11.5245	0.831562	0.120987	86	2	Yes	Yes	P56959	Yes	No	1	0	1	FUS, TLS		17ODYA
O75379	VAMP4_HUMAN	Vesicle-associated membrane protein 4	1.21134	0.197222	3	1	n/a	0.204588	0.68912						Yes	O70480	Yes	Yes	8	4	12	VAMP4	Vamp4	ABE, 17ODYA	ABE, 17ODYA
Q96JJ7	TMX3_HUMAN	Protein disulfide-isomerase TMX3	1.21277	0.348974	79	2	Yes	6.62e-07	6.17901						Yes	Q8BXZ1	Yes	Yes	8	4	12	TMX3, KIAA1830, TXNDC10	Tmx3, Kiaa1830, Txndc10	ABE, 17ODYA	17ODYA
O43169	CYB5B_HUMAN	Cytochrome b5 type B	1.21366	0.312835	59	2	No	2.37e-06	5.62439	0.642398	0.0974239	14	2	Yes	Yes	Q9CQX2	Yes	Yes	8	4	12	CYB5B, CYB5M, OMB5	Cyb5b, Cyb5m	ABE, 17ODYA	ABE, 17ODYA
O00487	PSDE_HUMAN	26S proteasome non-ATPase regulatory subunit 14	1.2138	0.290096	14	2	Yes	0.0173561	1.76055	1.93617	0.723784	3	1	n/a	Yes	O35593	Yes	Yes	1	2	3	PSMD14, POH1	Psmd14, Pad1	17ODYA	ABE, 17ODYA
Q31612	1B73_HUMAN	HLA class I histocompatibility antigen, B-73 alpha chain	1.21408	0.443821	37	2	Yes	0.00586989	2.23137						Yes	-	Yes	No	1	0	1	HLA-B, HLAB		ABE
Q99613	EIF3C_HUMAN	Eukaryotic translation initiation factor 3 subunit C	1.21498	0.296194	64	2	Yes	2.36e-07	6.62743						Yes	Q8R1B4	Yes	Yes	4	2	6	EIF3C, EIF3S8;, EIF3CL, EIF3S8	Eif3c, Eif3s8	ABE, 17ODYA	ABE, 17ODYA
P38405	GNAL_HUMAN	Guanine nucleotide-binding protein G(olf) subunit alpha	1.21534	0.139916	28	2	Yes	1.26e-08	7.89827	0.765537	0.00302406	3	1	n/a	Yes	Q8CGK7	No	Yes	0	1	1		Gnal		ABE
P55290	CAD13_HUMAN	Cadherin-13	1.21682	0.253836	27	2	Yes	0.00015978	3.79648						No
O15127	SCAM2_HUMAN	Secretory carrier-associated membrane protein 2	1.22051	0.215396	24	2	Yes	5.08e-05	4.29436						Yes	Q9ERN0	Yes	Yes	10	5	15	SCAMP2	Scamp2	ABE, 17ODYA	ABE, 17ODYA
Q9NZB2	F120A_HUMAN	Constitutive coactivator of PPAR-gamma-like protein 1	1.22203	0.254583	58	2	Yes	1.35e-08	7.87015						Yes	Q6A0A9	Yes	Yes	3	2	5	FAM120A, C9orf10, KIAA0183, OSSA	FAM120A, Kiaa0183, Ossa, BC010304	ABE, 17ODYA	17ODYA
Q02543	RL18A_HUMAN	60S ribosomal protein L18a	1.22317	0.29308	21	2	Yes	0.00245336	2.61024	1.43356	0.245764	31	2	Yes	Yes	P62717	Yes	No	2	0	2	RPL18A		17ODYA
P05387	RLA2_HUMAN	60S acidic ribosomal protein P2	1.22699	0.487128	50	2	Yes	0.0018547	2.73173	1.75197	0.535833	200	2	Yes	Yes	P99027	Yes	No	1	0	1	RPLP2, D11S2243E, RPP2		17ODYA
Q13200	PSMD2_HUMAN	26S proteasome non-ATPase regulatory subunit 2	1.22919	0.269722	18	1	n/a	0.00218496	2.66056	1.76058	0.26093	19	2	Yes	Yes	Q8VDM4	Yes	Yes	3	4	7	PSMD2, TRAP2	Psmd2	17ODYA	ABE, 17ODYA
Q14152	EIF3A_HUMAN	Eukaryotic translation initiation factor 3 subunit A	1.22924	0.316063	145	2	Yes	5.92e-15	14.2274						Yes	P23116	Yes	No	3	0	3	EIF3A, EIF3S10, KIAA0139		17ODYA
P19087	GNAT2_HUMAN	Guanine nucleotide-binding protein G(t) subunit alpha-2	1.22971	0.17455	38	2	Yes	1.21e-09	8.91748	0.765537	0.00302406	3	1	n/a	No
Q01814	AT2B2_HUMAN	Plasma membrane calcium-transporting ATPase 2	1.23015	0.291041	55	2	Yes	2.97e-07	6.52703						Yes	Q9R0K7	No	Yes	0	1	1		Atp2b2, Pmca2		ABE
Q13761	RUNX3_HUMAN	Runt-related transcription factor 3	1.23074	0.084901	3	1	n/a	0.0422885	1.37378						No
Q13950	RUNX2_HUMAN	Runt-related transcription factor 2	1.23074	0.084901	3	1	n/a	0.0422885	1.37378						No
P07814	SYEP_HUMAN	Bifunctional glutamate/proline--tRNA ligase	1.23263	0.219477	214	2	Yes	9.49e-37	36.0225	1.31816	0.265203	218	2	Yes	Yes	Q8CGC7	Yes	Yes	2	1	3	EPRS, GLNS, PARS, QARS, QPRS, PIG32	Eprs, Qprs	17ODYA	ABE
P53801	PTTG_HUMAN	Pituitary tumor-transforming gene 1 protein-interacting protein	1.23284	0.142405	11	2	Yes	0.000420211	3.37653						Yes	Q8R143	Yes	Yes	6	2	8	PTTG1IP, C21orf1, C21orf3	Pttg1ip	ABE, 17ODYA	17ODYA
Q9Y3I0	RTCB_HUMAN	tRNA-splicing ligase RtcB homolog	1.23337	0.254054	35	2	Yes	5.12e-06	5.29103	1.7738	0.377933	3	1	n/a	Yes	Q99LF4	Yes	Yes	3	1	4	C22orf28, HSPC117, RTCB	D10Wsu52e, Rtcb	ABE, 17ODYA	ABE
P46779	RL28_HUMAN	60S ribosomal protein L28	1.23362	0.224352	65	2	Yes	7.28e-12	11.1381	1.77698	0.273147	54	2	Yes	Yes	P41105	Yes	No	1	0	1	RPL28		17ODYA
Q96CW1	AP2M1_HUMAN	AP-2 complex subunit mu	1.23475	0.214722	5	1	n/a	0.070852	1.14965	1.33754	0.404954	3	1	n/a	Yes	P84091	Yes	No	2	0	2	AP2M1, CLAPM1, KIAA0109		ABE, 17ODYA
P20042	IF2B_HUMAN	Eukaryotic translation initiation factor 2 subunit 2	1.23559	0.245929	12	1	n/a	0.00685036	2.16429						Yes	Q99L45	Yes	Yes	1	1	2	EIF2S2, EIF2B	Eif2s2	17ODYA	ABE
P04843	RPN1_HUMAN	Dolichyl-diphosphooligosaccharide--protein glycosyltransferase subunit 1	1.23703	0.202475	270	2	Yes	2.12e-52	51.6741	1.19121	0.194863	83	2	Yes	Yes	Q91YQ5	Yes	Yes	2	2	4	RPN1	Rpn1	17ODYA	ABE, 17ODYA
P11940	PABP1_HUMAN	Polyadenylate-binding protein 1	1.23714	0.306827	45	2	Yes	5.52e-06	5.25818	1.13281	0.403381	87	2	Yes	Yes	P29341	Yes	Yes	1	1	2	PABPC1, PAB1, PABP1, PABPC2	Pabpc1, Pabp1	17ODYA	17ODYA
Q9Y3F4	STRAP_HUMAN	Serine-threonine kinase receptor-associated protein	1.23788	0.362807	10	2	No	0.0718442	1.14361	1.21495	0.456973	4	1	n/a	Yes	Q9Z1Z2	Yes	Yes	1	1	2	STRAP, MAWD, UNRIP	Strap, Unrip	17ODYA	17ODYA
P07737	PROF1_HUMAN	Profilin-1	1.23833	0.254997	50	2	Yes	2.93e-08	7.53346	3.20899	0.69536	163	2	Yes	Yes	P62962	Yes	Yes	4	2	6	PFN1	Pfn1	ABE, 17ODYA	17ODYA
P51571	SSRD_HUMAN	Translocon-associated protein subunit delta	1.23947	0.142555	64	2	Yes	4.99e-20	19.3015						Yes	Q62186	Yes	No	1	0	1	SSR4, TRAPD		17ODYA
Q12846	STX4_HUMAN	Syntaxin-4	1.23991	0.281584	62	2	Yes	7.84e-09	8.10572						Yes	P70452	Yes	Yes	3	2	5	STX4, STX4A	Stx4, Stx4a	17ODYA	17ODYA
P68104	EF1A1_HUMAN	Elongation factor 1-alpha 1	1.23992	0.351752	328	2	Yes	5.14e-29	28.289	2.65392	0.702292	416	2	Yes	Yes	P10126	Yes	Yes	3	2	5	EEF1A1, EEF1A, EF1A, LENG7	Eef1a1, Eef1a	17ODYA	ABE
Q5VTE0	EF1A3_HUMAN	Putative elongation factor 1-alpha-like 3	1.23992	0.351752	328	2	Yes	5.14e-29	28.289	2.64311	0.701152	398	2	Yes	Yes	-	Yes	No	1	0	1	EEF1A1P5, EEF1AL3		17ODYA
P53675	CLH2_HUMAN	Clathrin heavy chain 2	1.24024	0.355832	167	2	Yes	2.78e-15	14.5553	2.35202	0.647049	55	2	Yes	No
Q9UBV2	SE1L1_HUMAN	Protein sel-1 homolog 1	1.24092	0.359566	18	2	Yes	0.0117585	1.92965						No
P83731	RL24_HUMAN	60S ribosomal protein L24	1.24132	0.244929	72	2	Yes	3.96e-12	11.402	1.80979	0.228002	43	2	Yes	Yes	Q8BP67	Yes	No	1	0	1	RPL24		17ODYA
Q8IZA0	K319L_HUMAN	Dyslexia-associated protein KIAA0319-like protein	1.24152	0.373907	3	1	n/a	0.379573	0.420705						Yes	Q8K135	Yes	Yes	3	4	7	KIAA0319L, KIAA1837, PP791	Kiaa0319l, AU040320	ABE, 17ODYA	17ODYA
Q6NUQ4	TM214_HUMAN	Transmembrane protein 214	1.24324	0.0374542	4	1	n/a	0.000985382	3.0064						Yes	Q8BM55	Yes	No	1	0	1	TMEM214, PP446		17ODYA
Q6WCQ1	MPRIP_HUMAN	Myosin phosphatase Rho-interacting protein	1.2437	0.816405	5	1	n/a	0.541008	0.266797						Yes	P97434	Yes	No	1	0	1	MPRIP, KIAA0864, MRIP, RHOIP3		17ODYA
P27824	CALX_HUMAN	Calnexin	1.24481	0.246097	750	2	Yes	4.62e-114	113.335	0.887894	0.201091	172	2	Yes	Yes	P35564	Yes	Yes	12	6	18	CANX	Canx	ABE, 17ODYA	ABE, 17ODYA
P78368	KC1G2_HUMAN	Casein kinase I isoform gamma-2	1.24634	0.0460325	3	1	n/a	0.0114406	1.94155						Yes	Q8BVP5	Yes	Yes	4	1	5	CSNK1G2, CK1G2	Csnk1g2, Ck1g2	ABE, 17ODYA	17ODYA
Q9Y6M4	KC1G3_HUMAN	Casein kinase I isoform gamma-3	1.24634	0.0460325	3	1	n/a	0.0114406	1.94155						Yes	Q8C4X2	Yes	Yes	7	3	10	CSNK1G3	Csnk1g3	ABE, 17ODYA	ABE, 17ODYA
Q7KZF4	SND1_HUMAN	Staphylococcal nuclease domain-containing protein 1	1.24698	0.236973	380	2	Yes	1.47e-62	61.8316	1.4168	0.253995	139	2	Yes	Yes	Q78PY7	Yes	Yes	3	2	5	SND1, TDRD11	Snd1	ABE, 17ODYA	ABE, 17ODYA
P39656	OST48_HUMAN	Dolichyl-diphosphooligosaccharide--protein glycosyltransferase 48 kDa subunit	1.24713	0.16811	65	2	Yes	1.1e-17	16.96	1.27834	0.154376	20	2	Yes	Yes	O54734	Yes	No	1	0	1	DDOST, KIAA0115, OST48, OK/SW-cl.45		17ODYA
Q9P035	HACD3_HUMAN	Very-long-chain (3R)-3-hydroxyacyl-CoA dehydratase 3	1.24801	0.181947	27	2	Yes	2.01e-07	6.69736						Yes	Q8K2C9	Yes	Yes	3	3	6	PTPLAD1, BIND1, HACD3	Ptplad1, Hacd3, ptplad1, hacd3	ABE, 17ODYA	ABE, 17ODYA
O43292	GPAA1_HUMAN	Glycosylphosphatidylinositol anchor attachment 1 protein	1.24864	0.530356	7	1	n/a	0.261146	0.583117						No
P07205	PGK2_HUMAN	Phosphoglycerate kinase 2	1.25006	0.518256	4	1	n/a	0.405723	0.39177	3.33037	1.12539	36	2	Yes	Yes	P09041	No	Yes	0	1	1		Pgk2, Pgk-2		ABE
A8MTJ3	GNAT3_HUMAN	Guanine nucleotide-binding protein G(t) subunit alpha-3	1.25022	0.205654	44	2	Yes	4.46e-10	9.35082	0.765537	0.00302406	3	1	n/a	No
P11488	GNAT1_HUMAN	Guanine nucleotide-binding protein G(t) subunit alpha-1	1.25022	0.205654	44	2	Yes	4.46e-10	9.35082	0.765537	0.00302406	3	1	n/a	No
P62851	RS25_HUMAN	40S ribosomal protein S25	1.25295	0.233643	47	2	Yes	2.42e-09	8.61585	1.50061	0.140464	13	2	Yes	Yes	P62852	Yes	Yes	1	2	3	RPS25	Rps25	17ODYA	17ODYA
Q00610	CLH1_HUMAN	Clathrin heavy chain 1	1.25323	0.35985	546	2	Yes	1.29e-49	48.8899	1.98321	0.405857	284	2	Yes	Yes	Q68FD5	Yes	Yes	3	1	4	CLTC, CLH17, CLTCL2, KIAA0034	Cltc	17ODYA	ABE
Q96L21	RL10L_HUMAN	60S ribosomal protein L10-like	1.2548	0.347077	13	2	Yes	0.022708	1.64382	1.61854	0.0561867	9	2	Yes	Yes	P86048	Yes	Yes	1	1	2	RPL10L	Rpl10l	17ODYA	ABE
Q05639	EF1A2_HUMAN	Elongation factor 1-alpha 2	1.25531	0.250438	101	2	Yes	3.19e-17	16.4964	2.55497	0.623976	184	2	Yes	Yes	P62631	No	Yes	0	2	2		Eef1a2, Eef1al, Stn		ABE
Q9NY65	TBA8_HUMAN	Tubulin alpha-8 chain	1.25587	0.277146	91	2	Yes	9.43e-14	13.0256	4.86615	0.967924	123	2	Yes	No
P07195	LDHB_HUMAN	L-lactate dehydrogenase B chain	1.25632	0.115738	23	1	n/a	3.99e-10	9.39929	3.04704	0.514319	105	2	Yes	Yes	P16125	Yes	Yes	3	2	5	LDHB	Ldhb, Ldh-2, Ldh2	ABE, 17ODYA	ABE
P07900	HS90A_HUMAN	Heat shock protein HSP 90-alpha	1.25878	0.355539	115	2	Yes	3.27e-12	11.4861	1.72836	0.316554	335	2	Yes	Yes	P07901	Yes	Yes	2	1	3	HSP90AA1, HSP90A, HSPC1, HSPCA	Hsp90aa1, Hsp86, Hsp86-1, Hspca	17ODYA	ABE
P06733	ENOA_HUMAN	Alpha-enolase	1.25945	0.400025	133	2	Yes	9.56e-12	11.0195	4.97165	1.10848	475	2	Yes	Yes	P17182	Yes	Yes	4	2	6	ENO1, ENO1L1, MBPB1, MPB1	Eno1, Eno-1	ABE, 17ODYA	ABE
P20073	ANXA7_HUMAN	Annexin A7	1.26481	0.429669	7	2	No	0.163899	0.785425						Yes	Q07076	Yes	No	1	0	1	ANXA7, ANX7, SNX, OK/SW-cl.95		17ODYA
Q14204	DYHC1_HUMAN	Cytoplasmic dynein 1 heavy chain 1	1.26511	0.306317	464	2	Yes	3.02e-58	57.52						Yes	Q9JHU4	Yes	Yes	2	2	4	DYNC1H1, DHC1, DNCH1, DNCL, DNECL, DYHC, KIAA0325	Dync1h1, Dhc1, Dnch1, Dnchc1, Dyhc	17ODYA	ABE, 17ODYA
Q58FF8	H90B2_HUMAN	Putative heat shock protein HSP 90-beta 2	1.26602	0.356475	54	2	Yes	1.24e-06	5.90615	1.69682	0.255399	107	2	Yes	No
O76081	RGS20_HUMAN	Regulator of G-protein signaling 20	1.26742	0.255862	10	2	Yes	0.0107769	1.9675						Yes	Q9QZB1	Yes	Yes	3	1	4	RGS20, RGSZ1, ZGAP1	Rgs20, Rgsz1	ABE, 17ODYA	17ODYA
Q9Y3U8	RL36_HUMAN	60S ribosomal protein L36	1.26768	0.225482	19	2	Yes	7.62e-05	4.11828						Yes	P47964	Yes	No	1	0	1	RPL36		17ODYA
Q9BUF5	TBB6_HUMAN	Tubulin beta-6 chain	1.26883	0.287312	76	2	Yes	6.53e-12	11.1848	5.12508	1.11201	108	2	Yes	Yes	Q922F4	Yes	Yes	2	2	4	TUBB6	Tubb6	17ODYA	ABE, 17ODYA
P46977	STT3A_HUMAN	Dolichyl-diphosphooligosaccharide--protein glycosyltransferase subunit STT3A	1.27038	0.474352	54	2	Yes	0.000108873	3.96308						Yes	P46978	Yes	Yes	2	1	3	STT3A, ITM1, TMC	Stt3a, Itm1	ABE, 17ODYA	17ODYA
O75821	EIF3G_HUMAN	Eukaryotic translation initiation factor 3 subunit G	1.27316	0.0550442	4	1	n/a	0.00217578	2.66238						Yes	Q9Z1D1	No	Yes	0	1	1		Eif3g, Eif3p42, Eif3s4		ABE
P05388	RLA0_HUMAN	60S acidic ribosomal protein P0	1.27475	0.249594	238	2	Yes	8.46e-43	42.0725	1.84192	0.41694	157	2	Yes	Yes	P14869	Yes	Yes	2	3	5	RPLP0	Rplp0, Arbp	17ODYA	ABE, 17ODYA
Q8NHW5	RLA0L_HUMAN	60S acidic ribosomal protein P0-like	1.27594	0.203045	155	2	Yes	7.25e-37	36.1397	1.79348	0.306515	101	2	Yes	Yes	-	Yes	No	1	0	1	RPLP0P6		17ODYA
Q5T035	CI129_HUMAN	Putative uncharacterized protein C9orf129	1.27645	0.178627	5	2	Yes	0.0406203	1.39126						No
Q969M3	YIPF5_HUMAN	Protein YIPF5	1.27679	0.249247	13	2	Yes	0.00207195	2.68362						No
Q9Y679	AUP1_HUMAN	Ancient ubiquitous protein 1	1.2807	0.209274	4	1	n/a	0.074885	1.12561						Yes	P70295	Yes	Yes	8	1	9	AUP1	Aup1	ABE, 17ODYA	17ODYA
P16520	GBB3_HUMAN	Guanine nucleotide-binding protein G(I)/G(S)/G(T) subunit beta-3	1.28085	0.0385838	8	1	n/a	1.6e-07	6.79567						No
O15143	ARC1B_HUMAN	Actin-related protein 2/3 complex subunit 1B	1.28393	0.0238512	3	1	n/a	0.00234388	2.63006						Yes	Q9WV32	Yes	No	1	0	1	ARPC1B, ARC41		17ODYA
Q14568	HS902_HUMAN	Heat shock protein HSP 90-alpha A2	1.28466	0.363096	52	2	Yes	7.53e-07	6.12322	1.72128	0.339104	43	2	Yes	No
Q9UNL2	SSRG_HUMAN	Translocon-associated protein subunit gamma	1.2857	0.257124	19	2	Yes	0.000152292	3.81732						No
P09471	GNAO_HUMAN	Guanine nucleotide-binding protein G(o) subunit alpha	1.28721	0.208569	55	2	Yes	4.01e-14	13.3966	0.765537	0.00302406	3	1	n/a	Yes	P18872	Yes	Yes	6	3	9	GNAO1	Gnao1, Gna0, Gnao	ABE, 17ODYA	ABE, 17ODYA
P54920	SNAA_HUMAN	Alpha-soluble NSF attachment protein	1.29706	0.358567	5	1	n/a	0.137585	0.861428						Yes	Q9DB05	No	Yes	0	2	2		Napa, Snapa		ABE, 17ODYA
Q9UH99	SUN2_HUMAN	SUN domain-containing protein 2	1.29751	0.228987	10	2	No	0.00339719	2.46888						No
Q9BRR6	ADPGK_HUMAN	ADP-dependent glucokinase	1.2994	0.142643	7	1	n/a	0.00144172	2.84112						Yes	Q8VDL4	No	Yes	0	3	3		Adpgk		ABE, 17ODYA
Q99460	PSMD1_HUMAN	26S proteasome non-ATPase regulatory subunit 1	1.30189	0.267612	44	2	Yes	2.99e-09	8.52488	2.01861	0.748885	14	1	n/a	Yes	Q3TXS7	Yes	Yes	3	2	5	PSMD1	Psmd1	ABE, 17ODYA	ABE, 17ODYA
Q09666	AHNK_HUMAN	Neuroblast differentiation-associated protein AHNAK	1.30415	0.424288	1938	2	Yes	1.04e-176	175.981	2.58416	0.644193	743	2	Yes	Yes	-	Yes	No	2	0	2	AHNAK, PM227		ABE, 17ODYA
P55884	EIF3B_HUMAN	Eukaryotic translation initiation factor 3 subunit B	1.30607	0.127937	23	2	Yes	1.66e-10	9.78015	1.16325	0.666568	7	1	n/a	Yes	Q8JZQ9	Yes	Yes	3	1	4	EIF3B, EIF3S9	Eif3b, Eif3s9	17ODYA	17ODYA
Q16720	AT2B3_HUMAN	Plasma membrane calcium-transporting ATPase 3	1.30664	0.432845	65	2	Yes	3.26e-07	6.48627						No
Q14344	GNA13_HUMAN	Guanine nucleotide-binding protein subunit alpha-13	1.30867	0.31899	98	2	Yes	1.19e-15	14.9232						Yes	P27601	Yes	Yes	11	7	18	GNA13	Gna13, Gna-13	ABE, 17ODYA	ABE, 17ODYA
P63092	GNAS2_HUMAN	Guanine nucleotide-binding protein G(s) subunit alpha isoforms short	1.30918	0.259239	39	2	Yes	7.23e-09	8.14077	0.765537	0.00302406	3	1	n/a	Yes	P63094	Yes	Yes	3	3	6	GNAS, GNAS1, GSP	Gnas, Gnas1, MNCb-5546	ABE	ABE, 17ODYA
Q5JWF2	GNAS1_HUMAN	Guanine nucleotide-binding protein G(s) subunit alpha isoforms XLas	1.30918	0.259239	39	2	Yes	7.23e-09	8.14077	0.765537	0.00302406	3	1	n/a	No
Q9P2J5	SYLC_HUMAN	Leucine--tRNA ligase, cytoplasmic	1.30943	0.272827	106	2	Yes	1.24e-20	19.9062	1.53014	0.199163	31	2	Yes	Yes	Q8BMJ2	Yes	Yes	4	1	5	LARS, KIAA1352	Lars	ABE, 17ODYA	17ODYA
P04350	TBB4A_HUMAN	Tubulin beta-4A chain	1.31112	0.274663	123	2	Yes	1.11e-23	22.9533	4.77565	1.33236	227	2	Yes	Yes	Q9D6F9	No	Yes	0	1	1		Tubb4a, Tubb4		ABE
P30443	1A01_HUMAN	HLA class I histocompatibility antigen, A-1 alpha chain	1.31165	0.376146	31	2	Yes	7.43e-05	4.12924						Yes	-	Yes	No	2	0	2	HLA-A, HLAA, HLA		17ODYA
P16188	1A30_HUMAN	HLA class I histocompatibility antigen, A-30 alpha chain	1.31165	0.376146	31	2	Yes	7.43e-05	4.12924						Yes	-	Yes	No	1	0	1	HLA-A, HLAA		ABE
P30508	1C12_HUMAN	HLA class I histocompatibility antigen, Cw-12 alpha chain	1.31165	0.376146	31	2	Yes	7.43e-05	4.12924						Yes	-	Yes	No	1	0	1	HLA-C, HLAC		ABE
Q29960	1C16_HUMAN	HLA class I histocompatibility antigen, Cw-16 alpha chain	1.31165	0.376146	31	2	Yes	7.43e-05	4.12924						Yes	-	Yes	No	1	0	1	HLA-C, HLAC		ABE
P04439	1A03_HUMAN	HLA class I histocompatibility antigen, A-3 alpha chain	1.31165	0.376146	31	2	Yes	7.43e-05	4.12924						No
P05534	1A24_HUMAN	HLA class I histocompatibility antigen, A-24 alpha chain	1.31165	0.376146	31	2	Yes	7.43e-05	4.12924						No
P13746	1A11_HUMAN	HLA class I histocompatibility antigen, A-11 alpha chain	1.31165	0.376146	31	2	Yes	7.43e-05	4.12924						No
P30447	1A23_HUMAN	HLA class I histocompatibility antigen, A-23 alpha chain	1.31165	0.376146	31	2	Yes	7.43e-05	4.12924						No
P30455	1A36_HUMAN	HLA class I histocompatibility antigen, A-36 alpha chain	1.31165	0.376146	31	2	Yes	7.43e-05	4.12924						No
P09104	ENOG_HUMAN	Gamma-enolase	1.31233	0.304974	23	2	Yes	7.39e-05	4.13143	4.62285	1.47263	87	2	Yes	Yes	P17183	Yes	Yes	1	2	3	ENO2	Eno2, Eno-2	17ODYA	ABE
P63000	RAC1_HUMAN	Ras-related C3 botulinum toxin substrate 1	1.31803	0.364699	3	1	n/a	0.270035	0.568579	1.20414	0.284465	23	2	Yes	Yes	P63001	Yes	Yes	1	5	6	RAC1, TC25, MIG5	Rac1	17ODYA	ABE, 17ODYA
P35610	SOAT1_HUMAN	Sterol O-acyltransferase 1	1.32013	0.098584	15	1	n/a	5.11e-09	8.29174						Yes	Q61263	Yes	Yes	1	1	2	SOAT1, ACACT, ACACT1, ACAT, ACAT1, SOAT, STAT	Soat1, Acact	17ODYA	17ODYA
O96005	CLPT1_HUMAN	Cleft lip and palate transmembrane protein 1	1.32487	0.188199	18	2	Yes	1.71e-06	5.76694						Yes	Q8VBZ3	Yes	Yes	1	1	2	CLPTM1	Clptm1, N14	17ODYA	17ODYA
Q14789	GOGB1_HUMAN	Golgin subfamily B member 1	1.32653	0.458592	5	1	n/a	0.186565	0.729169						Yes	-	Yes	No	3	0	3	GOLGB1		ABE, 17ODYA
O43707	ACTN4_HUMAN	Alpha-actinin-4	1.33115	0.273538	735	2	Yes	4.84e-146	145.315	2.34153	0.433262	402	2	Yes	Yes	P57780	Yes	Yes	4	1	5	ACTN4	Actn4	ABE, 17ODYA	ABE
Q96RQ1	ERGI2_HUMAN	Endoplasmic reticulum-Golgi intermediate compartment protein 2	1.33123	0.285917	14	2	Yes	0.000970746	3.01289						Yes	Q9CR89	Yes	Yes	3	3	6	ERGIC2, ERV41, PTX1, CDA14	Ergic2	ABE, 17ODYA	17ODYA
P13929	ENOB_HUMAN	Beta-enolase	1.33334	0.319992	21	2	Yes	0.000132036	3.87931	4.41987	1.24991	100	2	Yes	No
P68371	TBB4B_HUMAN	Tubulin beta-4B chain	1.33358	0.29138	242	2	Yes	8.67e-46	45.0619	4.94661	1.37104	331	2	Yes	Yes	P68372	Yes	Yes	2	2	4	TUBB4B, TUBB2C	Tubb4b, Tubb2c	17ODYA	ABE, 17ODYA
Q13310	PABP4_HUMAN	Polyadenylate-binding protein 4	1.33655	0.221619	33	2	Yes	7.51e-10	9.12413	1.14694	0.419231	79	2	Yes	No
P07237	PDIA1_HUMAN	Protein disulfide-isomerase	1.34034	0.300751	265	2	Yes	3.08e-49	48.5113	1.84573	0.274981	411	2	Yes	Yes	P09103	Yes	Yes	3	1	4	P4HB, ERBA2L, PDI, PDIA1, PO4DB	P4hb, Pdia1	ABE, 17ODYA	ABE
O60637	TSN3_HUMAN	Tetraspanin-3	1.34429	0.6204	6	1	n/a	0.232137	0.634256						Yes	Q9QY33	Yes	Yes	1	2	3	TSPAN3, TM4SF8	Tspan3, Tm4sf8	ABE	17ODYA
P30501	1C02_HUMAN	HLA class I histocompatibility antigen, Cw-2 alpha chain	1.34514	0.337624	29	2	Yes	7.87e-06	5.10421						Yes	-	Yes	No	2	0	2	HLA-C, HLAC		ABE
Q29963	1C06_HUMAN	HLA class I histocompatibility antigen, Cw-6 alpha chain	1.34514	0.337624	29	2	Yes	7.87e-06	5.10421						Yes	-	Yes	No	1	0	1	HLA-C, HLAC		ABE
Q07000	1C15_HUMAN	HLA class I histocompatibility antigen, Cw-15 alpha chain	1.34514	0.337624	29	2	Yes	7.87e-06	5.10421						Yes	-	Yes	No	1	0	1	HLA-C, HLAC		ABE
P01893	HLAH_HUMAN	Putative HLA class I histocompatibility antigen, alpha chain H	1.34514	0.337624	29	2	Yes	7.87e-06	5.10421						No
P30505	1C08_HUMAN	HLA class I histocompatibility antigen, Cw-8 alpha chain	1.34514	0.337624	29	2	Yes	7.87e-06	5.10421						No
Q9TNN7	1C05_HUMAN	HLA class I histocompatibility antigen, Cw-5 alpha chain	1.34514	0.337624	29	2	Yes	7.87e-06	5.10421						No
P62987	RL40_HUMAN	Ubiquitin-60S ribosomal protein L40	1.34641	0.226394	113	2	Yes	3.75e-31	30.4263	1.52166	0.213779	20	2	Yes	Yes	P62984	Yes	Yes	1	1	2	UBA52, UBCEP2	Uba52, Ubcep2	17ODYA	17ODYA
P62979	RS27A_HUMAN	Ubiquitin-40S ribosomal protein S27a	1.34641	0.226394	113	2	Yes	3.75e-31	30.4263	1.46279	0.273186	79	2	Yes	Yes	P62983	Yes	Yes	6	3	9	RPS27A, UBA80, UBCEP1	Rps27a, Uba80, Ubcep1	ABE, 17ODYA	17ODYA
Q13509	TBB3_HUMAN	Tubulin beta-3 chain	1.35283	0.281244	156	2	Yes	1.08e-33	32.9685	5.00423	1.5725	227	2	Yes	Yes	Q9ERD7	Yes	Yes	2	1	3	TUBB3, TUBB4	Tubb3	17ODYA	ABE
P11498	PYC_HUMAN	Pyruvate carboxylase, mitochondrial	1.35295	0.36955	30	1	n/a	1.33e-05	4.87485	1.86798	0.618625	57	2	Yes	Yes	Q05920	Yes	Yes	1	3	4	PC	Pc, Pcx	17ODYA	ABE, 17ODYA
P78347	GTF2I_HUMAN	General transcription factor II-I	1.35938	0.385163	20	2	No	0.000571854	3.24271						No
Q99973	TEP1_HUMAN	Telomerase protein component 1	1.36005	0.132076	3	1	n/a	0.0420446	1.37629						No
O14828	SCAM3_HUMAN	Secretory carrier-associated membrane protein 3	1.36191	0.408105	238	2	Yes	9.22e-32	31.0355						Yes	O35609	Yes	Yes	11	6	17	SCAMP3, C1orf3, PROPIN1	Scamp3	ABE, 17ODYA	ABE, 17ODYA
Q9BQE3	TBA1C_HUMAN	Tubulin alpha-1C chain	1.36368	0.326332	205	2	Yes	1.11e-37	36.9554	5.0323	1.25565	264	2	Yes	Yes	P68373	No	Yes	0	1	1		Tuba1c, Tuba6		17ODYA
P68363	TBA1B_HUMAN	Tubulin alpha-1B chain	1.36529	0.322683	212	2	Yes	1.01e-39	38.9939	4.99886	1.21851	285	2	Yes	Yes	P05213	Yes	Yes	1	1	2	TUBA1B	Tuba1b, Tuba2	17ODYA	17ODYA
P01892	1A02_HUMAN	HLA class I histocompatibility antigen, A-2 alpha chain	1.36718	0.336756	29	2	Yes	2.97e-06	5.52741						Yes	-	Yes	No	1	0	1	HLA-A, HLAA		ABE
Q95604	1C17_HUMAN	HLA class I histocompatibility antigen, Cw-17 alpha chain	1.36718	0.336756	29	2	Yes	2.97e-06	5.52741						Yes	-	Yes	No	1	0	1	HLA-C, D6S204, HLA-JY3, HLAC		ABE
P10314	1A32_HUMAN	HLA class I histocompatibility antigen, A-32 alpha chain	1.36718	0.336756	29	2	Yes	2.97e-06	5.52741						No
P16189	1A31_HUMAN	HLA class I histocompatibility antigen, A-31 alpha chain	1.36718	0.336756	29	2	Yes	2.97e-06	5.52741						No
P30456	1A43_HUMAN	HLA class I histocompatibility antigen, A-43 alpha chain	1.36718	0.336756	29	2	Yes	2.97e-06	5.52741						No
P30459	1A74_HUMAN	HLA class I histocompatibility antigen, A-74 alpha chain	1.36718	0.336756	29	2	Yes	2.97e-06	5.52741						No
P30512	1A29_HUMAN	HLA class I histocompatibility antigen, A-29 alpha chain	1.36718	0.336756	29	2	Yes	2.97e-06	5.52741						No
Q9BVA1	TBB2B_HUMAN	Tubulin beta-2B chain	1.37177	0.279734	230	2	Yes	1.47e-52	51.8341	5.11273	1.35085	313	2	Yes	Yes	Q9CWF2	Yes	Yes	1	1	2	TUBB2B	Tubb2b	17ODYA	ABE
Q13885	TBB2A_HUMAN	Tubulin beta-2A chain	1.37177	0.279734	230	2	Yes	1.47e-52	51.8341	5.11823	1.35233	312	2	Yes	No
Q01844	EWS_HUMAN	RNA-binding protein EWS	1.37246	0.185194	17	1	n/a	3.47e-07	6.45968	0.929466	0.183432	45	2	Yes	No
O15371	EIF3D_HUMAN	Eukaryotic translation initiation factor 3 subunit D	1.37283	0.582949	51	2	Yes	3.35e-05	4.47501						Yes	O70194	Yes	Yes	1	1	2	EIF3D, EIF3S7	Eif3d, Eif3s7	17ODYA	ABE
Q71U36	TBA1A_HUMAN	Tubulin alpha-1A chain	1.37314	0.326865	203	2	Yes	1.63e-38	37.7886	4.92939	1.32522	268	2	Yes	Yes	P68369	Yes	Yes	2	2	4	TUBA1A, TUBA3	Tuba1a, Tuba1	17ODYA	ABE, 17ODYA
Q13748	TBA3C_HUMAN	Tubulin alpha-3C/D chain	1.37439	0.345262	174	2	Yes	4.41e-31	30.3557	4.67307	1.4236	199	2	Yes	Yes	-	Yes	No	1	0	1	TUBA3C, TUBA2;, TUBA3D		17ODYA
Q92499	DDX1_HUMAN	ATP-dependent RNA helicase DDX1	1.37678	0.216226	53	2	Yes	2.13e-17	16.6717	1.46117	0.367225	39	2	Yes	Yes	Q91VR5	Yes	Yes	2	2	4	DDX1	Ddx1	17ODYA	ABE
P09525	ANXA4_HUMAN	Annexin A4	1.37792	0.50885	56	2	Yes	8.63e-07	6.06375						Yes	P97429	Yes	Yes	3	2	5	ANXA4, ANX4	Anxa4, Anx4	ABE, 17ODYA	ABE, 17ODYA
P0CG47	UBB_HUMAN	Polyubiquitin-B	1.38008	0.289274	73	2	Yes	2.15e-17	16.6675	1.52711	0.72802	12	2	No	Yes	P0CG49	Yes	No	1	0	1	UBB		17ODYA
P0CG48	UBC_HUMAN	Polyubiquitin-C	1.38008	0.289274	73	2	Yes	2.15e-17	16.6675	1.52711	0.72802	12	2	No	Yes	P0CG50	Yes	Yes	1	1	2	UBC	Ubc	17ODYA	ABE
P00558	PGK1_HUMAN	Phosphoglycerate kinase 1	1.38161	0.216484	7	1	n/a	0.00345338	2.46176	3.87672	0.874234	179	2	Yes	Yes	P09411	Yes	Yes	2	2	4	PGK1, PGKA, MIG10, OK/SW-cl.110	Pgk1, Pgk-1	17ODYA	ABE
P62750	RL23A_HUMAN	60S ribosomal protein L23a	1.38806	0.24579	10	1	n/a	0.000746357	3.12705	1.48111	0.448048	34	2	Yes	No
O00299	CLIC1_HUMAN	Chloride intracellular channel protein 1	1.38984	0.563202	6	1	n/a	0.150747	0.82175	3.21989	0.65194	49	2	Yes	Yes	Q9Z1Q5	Yes	Yes	2	3	5	CLIC1, G6, NCC27	Clic1	17ODYA	ABE, 17ODYA
P14618	KPYM_HUMAN	Pyruvate kinase PKM	1.39095	0.347354	172	2	Yes	2.87e-32	31.5425	4.24649	1.23693	505	2	Yes	Yes	P52480	Yes	Yes	4	2	6	PKM, OIP3, PK2, PK3, PKM2	Pkm, Pk3, Pkm2, Pykm	ABE, 17ODYA	ABE
Q8NFQ8	TOIP2_HUMAN	Torsin-1A-interacting protein 2	1.39157	0.399366	4	1	n/a	0.144715	0.839485						No
O95573	ACSL3_HUMAN	Long-chain-fatty-acid--CoA ligase 3	1.39535	0.371048	275	2	Yes	4.15e-47	46.3819	0.713141	0.119233	83	2	Yes	Yes	Q9CZW4	Yes	Yes	2	1	3	ACSL3, ACS3, FACL3, LACS3	Acsl3, Acs3, Facl3	17ODYA	17ODYA
O00461	GOLI4_HUMAN	Golgi integral membrane protein 4	1.39934	0.220268	48	2	Yes	1.8e-16	15.7457						Yes	Q8BXA1	Yes	Yes	5	6	11	GOLIM4, GIMPC, GOLPH4, GPP130	Golim4, Df10, Golph4	ABE, 17ODYA	ABE, 17ODYA
Q6PEY2	TBA3E_HUMAN	Tubulin alpha-3E chain	1.39994	0.333424	154	2	Yes	1.74e-31	30.7588	4.70629	1.43832	181	2	Yes	Yes	-	Yes	No	1	0	1	TUBA3E		17ODYA
Q8TC12	RDH11_HUMAN	Retinol dehydrogenase 11	1.40001	0.537222	22	1	n/a	0.00217075	2.66339						Yes	Q9QYF1	Yes	No	1	0	1	SDR7C1, RDH11, ARSDR1, PSDR1, CGI-82		17ODYA
P07437	TBB5_HUMAN	Tubulin beta chain	1.40114	0.30082	297	2	Yes	1.07e-67	66.9707	5.24158	1.41473	395	2	Yes	Yes	P99024	Yes	Yes	2	3	5	TUBB, TUBB5, OK/SW-cl.56	Tubb5	17ODYA	ABE, 17ODYA
P53618	COPB_HUMAN	Coatomer subunit beta	1.4031	0.546756	37	2	Yes	7.53e-05	4.12339						Yes	Q9JIF7	Yes	Yes	1	2	3	COPB1, COPB, MSTP026	Copb1, Copb	17ODYA	ABE, 17ODYA
P10321	1C07_HUMAN	HLA class I histocompatibility antigen, Cw-7 alpha chain	1.40666	0.256587	25	2	Yes	5.05e-08	7.29711						Yes	-	Yes	No	1	0	1	HLA-C, HLAC		ABE
Q09160	1A80_HUMAN	HLA class I histocompatibility antigen, A-80 alpha chain	1.40666	0.256587	25	2	Yes	5.05e-08	7.29711						No
Q9Y4P3	TBL2_HUMAN	Transducin beta-like protein 2	1.41209	0.429988	17	1	n/a	0.001143	2.94195	0.823214	0.274741	3	1	n/a	Yes	Q9R099	Yes	No	1	0	1	TBL2, WBSCR13, UNQ563/PRO1125		ABE
Q08043	ACTN3_HUMAN	Alpha-actinin-3	1.4145	0.305866	145	2	Yes	1.83e-34	33.7384	2.41178	0.370074	94	2	Yes	No
Q12797	ASPH_HUMAN	Aspartyl/asparaginyl beta-hydroxylase	1.41729	0.418683	119	2	Yes	1.87e-19	18.7284	1.82489	0.129602	48	2	Yes	Yes	Q8BSY0	Yes	No	1	0	1	BAH, ASPH		17ODYA
P35609	ACTN2_HUMAN	Alpha-actinin-2	1.41801	0.274967	194	2	Yes	4.14e-52	51.3825	2.40784	0.386382	113	2	Yes	No
P63010	AP2B1_HUMAN	AP-2 complex subunit beta	1.41915	0.1355	25	2	Yes	1.2e-13	12.9202						Yes	Q9DBG3	Yes	Yes	1	3	4	AP2B1, ADTB2, CLAPB1	Ap2b1, Clapb1	17ODYA	ABE, 17ODYA
Q9UNK0	STX8_HUMAN	Syntaxin-8	1.42168	0.108162	10	1	n/a	6.12e-07	6.21355						Yes	O88983	Yes	Yes	10	3	13	STX8	Stx8	ABE, 17ODYA	ABE, 17ODYA
Q6DD88	ATLA3_HUMAN	Atlastin-3	1.42206	0.295804	127	2	Yes	3.19e-32	31.4957	1.05904	0.316718	24	2	No	Yes	Q91YH5	Yes	Yes	1	1	2	ATL3	Atl3	17ODYA	17ODYA
Q92616	GCN1L_HUMAN	Translational activator GCN1	1.42387	0.43614	7	1	n/a	0.0422615	1.37406						Yes	-	Yes	No	1	0	1	GCN1L1, KIAA0219		17ODYA
Q99536	VAT1_HUMAN	Synaptic vesicle membrane protein VAT-1 homolog	1.42819	0.227965	20	2	Yes	1.21e-07	6.91556	2.3602	2.00814	4	1	n/a	Yes	Q62465	Yes	Yes	2	1	3	VAT1	Vat1, Vat-1	17ODYA	17ODYA
Q969E2	SCAM4_HUMAN	Secretory carrier-associated membrane protein 4	1.43043	0.0908497	8	1	n/a	3.02e-06	5.51975						Yes	Q9JKV5	Yes	Yes	4	1	5	SCAMP4	Scamp4	ABE	17ODYA
P20020	AT2B1_HUMAN	Plasma membrane calcium-transporting ATPase 1	1.43253	0.427912	141	2	Yes	3.21e-23	22.4929						No
P54136	SYRC_HUMAN	Arginine--tRNA ligase, cytoplasmic	1.43691	0.341625	41	2	Yes	5.3e-10	9.27536	1.0721	0.286031	10	1	n/a	Yes	Q9D0I9	Yes	Yes	2	2	4	RARS	Rars	17ODYA	ABE, 17ODYA
P25789	PSA4_HUMAN	Proteasome subunit alpha type-4	1.43847	0.0764842	3	1	n/a	0.00999072	2.0004	1.82097	0.411415	20	2	Yes	Yes	Q9R1P0	Yes	No	2	0	2	PSMA4, HC9, PSC9		17ODYA
O76038	SEGN_HUMAN	Secretagogin	1.44641	0.0566135	4	1	n/a	0.000554243	3.2563						No
P11216	PYGB_HUMAN	Glycogen phosphorylase, brain form	1.44687	0.414463	66	2	No	1.49e-12	11.8267	5.78891	2.01515	123	2	Yes	Yes	Q8CI94	Yes	Yes	1	2	3	PYGB	Pygb	17ODYA	ABE
Q92626	PXDN_HUMAN	Peroxidasin homolog	1.45516	0.460344	7	1	n/a	0.0397999	1.40012						No
O00161	SNP23_HUMAN	Synaptosomal-associated protein 23	1.45598	0.412591	223	2	Yes	2.07e-40	39.6832						Yes	O09044	Yes	Yes	13	6	19	SNAP23	Snap23, Sndt	ABE, 17ODYA	ABE, 17ODYA
P80723	BASP1_HUMAN	Brain acid soluble protein 1	1.45607	0.204298	12	1	n/a	9.01e-06	5.0455	3.15719	0.644744	58	2	Yes	Yes	Q91XV3	Yes	Yes	2	1	3	BASP1, NAP22	Basp1, Nap22	17ODYA	17ODYA
Q9Y678	COPG1_HUMAN	Coatomer subunit gamma-1	1.45672	0.390153	49	2	Yes	1.31e-10	9.88333						Yes	Q9QZE5	Yes	Yes	1	3	4	COPG1, COPG	Copg1, Copg	17ODYA	ABE, 17ODYA
P53621	COPA_HUMAN	Coatomer subunit alpha	1.4586	0.473927	109	2	Yes	2.99e-17	16.525						Yes	Q8CIE6	Yes	Yes	3	2	5	COPA	Copa	17ODYA	ABE, 17ODYA
P46063	RECQ1_HUMAN	ATP-dependent DNA helicase Q1	1.46424	0.187442	7	2	Yes	0.00124024	2.90649						Yes	Q9Z129	Yes	No	1	0	1	RECQL, RECQ1, RECQL1		17ODYA
P20645	MPRD_HUMAN	Cation-dependent mannose-6-phosphate receptor	1.46442	0.124626	32	2	Yes	1.54e-19	18.812						Yes	P24668	Yes	Yes	8	6	14	M6PR, MPR46, MPRD	M6pr, 46mpr	ABE, 17ODYA	ABE, 17ODYA
Q9Y6M1	IF2B2_HUMAN	Insulin-like growth factor 2 mRNA-binding protein 2	1.47316	0.342517	17	2	No	4.24e-05	4.37247						No
P08240	SRPR_HUMAN	Signal recognition particle receptor subunit alpha	1.47605	0.232082	26	2	Yes	2.03e-10	9.69237						Yes	Q9DBG7	Yes	No	1	0	1	SRPR		17ODYA
O00425	IF2B3_HUMAN	Insulin-like growth factor 2 mRNA-binding protein 3	1.47747	0.128407	7	1	n/a	6.36e-05	4.19676						No
Q9NZI8	IF2B1_HUMAN	Insulin-like growth factor 2 mRNA-binding protein 1	1.47747	0.128407	7	1	n/a	6.36e-05	4.19676						No
P30613	KPYR_HUMAN	Pyruvate kinase PKLR	1.47963	0.477368	31	2	No	4.87e-06	5.31203	4.65314	0.787765	26	2	Yes	No
P35606	COPB2_HUMAN	Coatomer subunit beta'	1.48403	0.252965	36	2	Yes	3.03e-13	12.5182						Yes	O55029	Yes	Yes	1	3	4	COPB2	Copb2	17ODYA	ABE, 17ODYA
Q8NE71	ABCF1_HUMAN	ATP-binding cassette sub-family F member 1	1.48703	0.438197	10	1	n/a	0.00657041	2.18241						No
Q8TCT9	HM13_HUMAN	Minor histocompatibility antigen H13	1.48844	0.230204	45	2	Yes	7.12e-18	17.1474						Yes	Q9D8V0	Yes	Yes	2	1	3	HM13, H13, IMP1, PSL3, SPP, MSTP086	Hm13, H13, Psl3	ABE, 17ODYA	17ODYA
Q8TCJ2	STT3B_HUMAN	Dolichyl-diphosphooligosaccharide--protein glycosyltransferase subunit STT3B	1.48956	0.184244	17	2	Yes	1.48e-08	7.82831						Yes	Q3TDQ1	Yes	Yes	3	1	4	STT3B, SIMP	Stt3b, Simp	17ODYA	17ODYA
P26641	EF1G_HUMAN	Elongation factor 1-gamma	1.49014	0.304931	28	2	Yes	5.5e-09	8.2594	1.9604	0.211214	46	2	Yes	Yes	Q9D8N0	Yes	Yes	3	1	4	EEF1G, EF1G, PRO1608	Eef1g	ABE, 17ODYA	ABE
Q9UH73	COE1_HUMAN	Transcription factor COE1	1.49358	0.0771013	3	1	n/a	0.00803577	2.09497						No
Q15046	SYK_HUMAN	Lysine--tRNA ligase	1.49594	0.136366	11	2	Yes	7.37e-07	6.13257						Yes	Q99MN1	Yes	No	2	0	2	KARS, KIAA0070		17ODYA
P22314	UBA1_HUMAN	Ubiquitin-like modifier-activating enzyme 1	1.50377	0.131531	9	2	Yes	8.5e-06	5.07035	3.80595	1.04683	101	2	Yes	Yes	Q02053	Yes	Yes	3	3	6	UBA1, A1S9T, UBE1	Uba1, Sbx, Ube1, Ube1ax, Ube1x	ABE, 17ODYA	ABE, 17ODYA
P00387	NB5R3_HUMAN	NADH-cytochrome b5 reductase 3	1.50409	0.318674	112	2	Yes	5.05e-32	31.2963	1.4611	0.171262	20	1	n/a	Yes	Q9DCN2	Yes	Yes	4	4	8	CYB5R3, DIA1	Cyb5r3, Dia1	17ODYA	ABE, 17ODYA
Q8NCA5	FA98A_HUMAN	Protein FAM98A	1.50641	0.0234477	4	1	n/a	2.73e-05	4.56366						No
O15554	KCNN4_HUMAN	Intermediate conductance calcium-activated potassium channel protein 4	1.50847	0.489214	4	1	n/a	0.129159	0.888876						No
Q7Z7B0	FLIP1_HUMAN	Filamin-A-interacting protein 1	1.50847	0.489214	4	1	n/a	0.129159	0.888876						No
P15151	PVR_HUMAN	Poliovirus receptor	1.51808	0.51009	3	1	n/a	0.220618	0.656359						Yes	-	Yes	No	6	0	6	PVR, PVS		ABE, 17ODYA
Q9Y281	COF2_HUMAN	Cofilin-2	1.52169	0.371594	6	1	n/a	0.0184566	1.73385	2.6119	0.714881	105	2	Yes	Yes	P45591	Yes	Yes	1	1	2	CFL2	Cfl2	ABE	17ODYA
Q86Y82	STX12_HUMAN	Syntaxin-12	1.524	0.282274	113	2	Yes	4.31e-38	37.3652	1.20695	0.0213925	3	1	n/a	Yes	Q9ER00	Yes	Yes	9	6	15	STX12	Stx12	ABE, 17ODYA	ABE, 17ODYA
P07355	ANXA2_HUMAN	Annexin A2	1.52411	0.48065	958	2	Yes	4.68e-165	164.329	2.91099	0.618519	555	2	Yes	Yes	P07356	Yes	Yes	1	2	3	ANXA2, ANX2, ANX2L4, CAL1H, LPC2D	Anxa2, Anx2, Cal1h	17ODYA	ABE, 17ODYA
P84077	ARF1_HUMAN	ADP-ribosylation factor 1	1.5315	0.794282	15	2	No	0.0223569	1.65059	1.69362	0.600334	36	2	Yes	Yes	P84078	Yes	Yes	3	2	5	ARF1	Arf1	17ODYA	ABE, 17ODYA
P61204	ARF3_HUMAN	ADP-ribosylation factor 3	1.5315	0.794282	15	2	No	0.0223569	1.65059	1.9013	0.430748	28	2	Yes	Yes	P61205	Yes	Yes	2	3	5	ARF3	Arf3	17ODYA	ABE, 17ODYA
A6NCN2	KR87P_HUMAN	Putative keratin-87 protein	1.53508	0.199607	4	1	n/a	0.0126992	1.89623	1.15846	0.485663	37	2	Yes	No
A6NMY6	AXA2L_HUMAN	Putative annexin A2-like protein	1.53597	0.497362	726	2	Yes	1.61e-123	122.794	2.99553	0.63793	318	2	Yes	Yes	-	Yes	No	1	0	1	ANXA2P2, ANX2L2, ANX2P2, LPC2B		17ODYA
P35052	GPC1_HUMAN	Glypican-1	1.53622	0.171014	15	2	Yes	1.81e-08	7.74203						No
Q9UNN8	EPCR_HUMAN	Endothelial protein C receptor	1.53943	0.126695	15	1	n/a	1.44e-10	9.84019						Yes	Q64695	Yes	Yes	5	1	6	PROCR, EPCR	Procr, Epcr	ABE, 17ODYA	17ODYA
O00291	HIP1_HUMAN	Huntingtin-interacting protein 1	1.54495	0.286362	3	1	n/a	0.0810164	1.09143						No
P35998	PRS7_HUMAN	26S protease regulatory subunit 7	1.54662	0.172286	3	1	n/a	0.0315547	1.50094	1.63233	0.240439	11	2	Yes	Yes	P46471	Yes	Yes	2	1	3	PSMC2, MSS1	Psmc2, Mss1	17ODYA	17ODYA
P23528	COF1_HUMAN	Cofilin-1	1.54662	0.324508	12	1	n/a	0.000113316	3.94571	2.48602	0.725476	179	2	Yes	Yes	P18760	Yes	Yes	3	2	5	CFL1, CFL	Cfl1	ABE, 17ODYA	17ODYA
Q8N4A0	GALT4_HUMAN	Polypeptide N-acetylgalactosaminyltransferase 4	1.56112	0.669887	6	1	n/a	0.0954265	1.02033						No
P12814	ACTN1_HUMAN	Alpha-actinin-1	1.5613	0.439447	701	2	Yes	2.86e-149	148.543	2.33244	0.392801	353	2	Yes	Yes	Q7TPR4	Yes	No	3	0	3	ACTN1		ABE, 17ODYA
P09382	LEG1_HUMAN	Galectin-1	1.56162	0.331215	213	2	Yes	2.61e-64	63.5829	2.1047	0.451378	302	2	Yes	Yes	P16045	Yes	No	3	0	3	LGALS1		ABE, 17ODYA
Q14444	CAPR1_HUMAN	Caprin-1	1.56174	0.258068	7	1	n/a	0.00119468	2.92275	0.995975	0.167681	6	1	n/a	Yes	Q60865	Yes	No	1	0	1	CAPRIN1, GPIAP1, GPIP137, M11S1, RNG105		17ODYA
P25398	RS12_HUMAN	40S ribosomal protein S12	1.56203	0.166142	9	1	n/a	7.6e-06	5.11902	1.37668	0.222329	42	2	Yes	Yes	P63323	Yes	No	2	0	2	RPS12		17ODYA
P04899	GNAI2_HUMAN	Guanine nucleotide-binding protein G(i) subunit alpha-2	1.56756	0.419278	181	2	Yes	1.32e-42	41.8802	0.973325	0.109121	21	2	Yes	Yes	P08752	Yes	Yes	10	8	18	GNAI2, GNAI2B	Gnai2, Gnai-2	ABE, 17ODYA	ABE, 17ODYA
P21333	FLNA_HUMAN	Filamin-A	1.56861	0.446861	496	2	Yes	1.28e-105	104.894	2.7219	0.891806	563	2	Yes	Yes	Q8BTM8	Yes	Yes	3	1	4	FLNA, FLN, FLN1	Flna, Fln, Fln1	17ODYA	ABE
O60522	TDRD6_HUMAN	Tudor domain-containing protein 6	1.5778	0.462917	6	1	n/a	0.0281863	1.54996						No
Q9NR50	EI2BG_HUMAN	Translation initiation factor eIF-2B subunit gamma	1.58817	0.0573269	3	1	n/a	0.00315158	2.50147						No
Q13451	FKBP5_HUMAN	Peptidyl-prolyl cis-trans isomerase FKBP5	1.59628	0.129708	6	1	n/a	9.65e-05	4.01551	2.70859	0.526481	46	2	Yes	No
Q00013	EM55_HUMAN	55 kDa erythrocyte membrane protein	1.59669	2.28214	3	1	n/a	0.69503	0.157997						Yes	P70290	Yes	Yes	3	2	5	MPP1, DXS552E, EMP55	Mpp1	ABE	17ODYA
Q15836	VAMP3_HUMAN	Vesicle-associated membrane protein 3	1.60018	0.627385	98	2	Yes	2.05e-15	14.6893						Yes	P63024	Yes	Yes	11	5	16	VAMP3, SYB3	Vamp3, Syb3	ABE, 17ODYA	ABE, 17ODYA
P55072	TERA_HUMAN	Transitional endoplasmic reticulum ATPase	1.60039	0.266721	160	2	Yes	4.21e-64	63.3756	1.82958	0.361953	201	2	Yes	Yes	Q01853	Yes	Yes	2	2	4	VCP	Vcp	17ODYA	ABE, 17ODYA
P39019	RS19_HUMAN	40S ribosomal protein S19	1.60079	0.175482	3	1	n/a	0.0272797	1.56416	1.40941	0.19723	102	2	Yes	Yes	Q9CZX8	Yes	Yes	1	1	2	RPS19	Rps19	17ODYA	17ODYA
P20618	PSB1_HUMAN	Proteasome subunit beta type-1	1.60272	0.457264	3	1	n/a	0.149889	0.824229	1.79853	0.191136	24	2	Yes	Yes	O09061	Yes	Yes	1	1	2	PSMB1, PSC5	Psmb1	17ODYA	ABE
Q9Y282	ERGI3_HUMAN	Endoplasmic reticulum-Golgi intermediate compartment protein 3	1.60569	0.37935	16	1	n/a	1.22e-05	4.91271						Yes	Q9CQE7	Yes	Yes	10	4	14	ERGIC3, C20orf47, ERV46, SDBCAG84, CGI-54, PRO0989	Ergic3, Erv46, Sdbcag84	ABE, 17ODYA	ABE, 17ODYA
O94874	UFL1_HUMAN	E3 UFM1-protein ligase 1	1.61026	0.121918	8	2	Yes	7.76e-06	5.11031						No
Q14108	SCRB2_HUMAN	Lysosome membrane protein 2	1.62467	0.262685	101	2	Yes	6.69e-43	42.1746						Yes	O35114	Yes	Yes	8	5	13	SCARB2, CD36L2, LIMPII, LIMP2	Scarb2	ABE, 17ODYA	ABE, 17ODYA
Q08J23	NSUN2_HUMAN	tRNA (cytosine(34)-C(5))-methyltransferase	1.63126	0.0252124	3	1	n/a	0.000531298	3.27466						Yes	Q1HFZ0	Yes	Yes	2	1	3	NSUN2, SAKI, TRM4	Nsun2, D13Wsu123e, Misu	ABE, 17ODYA	17ODYA
Q99943	PLCA_HUMAN	1-acyl-sn-glycerol-3-phosphate acyltransferase alpha	1.63972	0.150514	19	2	Yes	1.04e-12	11.9824						Yes	O35083	Yes	Yes	5	1	6	AGPAT1, G15	Agpat1	ABE, 17ODYA	17ODYA
O15258	RER1_HUMAN	Protein RER1	1.64562	0.400553	3	1	n/a	0.107929	0.96686						Yes	Q9CQU3	Yes	Yes	2	2	4	RER1	Rer1	17ODYA	17ODYA
P13164	IFM1_HUMAN	Interferon-induced transmembrane protein 1	1.69121	0.402518	61	2	Yes	1.44e-19	18.8422						Yes	Q9D103	Yes	Yes	5	0	5	IFITM1, CD225, IFI17	Ifitm1	ABE, 17ODYA
Q01629	IFM2_HUMAN	Interferon-induced transmembrane protein 2	1.69121	0.402518	61	2	Yes	1.44e-19	18.8422						Yes	Q99J93	Yes	Yes	3	5	8	IFITM2	Ifitm2	ABE, 17ODYA	ABE, 17ODYA
P26006	ITA3_HUMAN	Integrin alpha-3	1.69255	0.402935	43	2	Yes	3.91e-14	13.4077	0.966258	0.224447	35	2	No	Yes	Q62470	Yes	Yes	5	1	6	ITGA3, MSK18	Itga3	ABE, 17ODYA	17ODYA
P56539	CAV3_HUMAN	Caveolin-3	1.69328	0.299086	8	2	Yes	0.000602778	3.21984						No
P17252	KPCA_HUMAN	Protein kinase C alpha type	1.70617	1.27285	6	1	n/a	0.232246	0.634053						No
P50148	GNAQ_HUMAN	Guanine nucleotide-binding protein G(q) subunit alpha	1.71407	0.472834	101	2	Yes	1.38e-27	26.8611						Yes	P21279	Yes	Yes	10	7	17	GNAQ, GAQ	Gnaq	ABE, 17ODYA	ABE, 17ODYA
Q5W111	SPRY7_HUMAN	SPRY domain-containing protein 7	1.72482	0.50625	23	2	Yes	8.7e-07	6.06036						Yes	Q3TFQ1	Yes	Yes	5	6	11	SPRYD7, C13orf1, CLLD6	Spryd7, Clld6, 6330409N04Rik	ABE, 17ODYA	ABE, 17ODYA
Q6PIU2	NCEH1_HUMAN	Neutral cholesterol ester hydrolase 1	1.74347	0.218036	20	2	Yes	9.78e-12	11.0097						Yes	Q8BLF1	Yes	No	4	0	4	NCEH1, AADACL1, KIAA1363		ABE, 17ODYA
Q15012	LAP4A_HUMAN	Lysosomal-associated transmembrane protein 4A	1.75348	0.00534789	3	1	n/a	1.68e-05	4.77491						Yes	Q60961	Yes	Yes	3	2	5	LAPTM4A, KIAA0108, LAPTM4, MBNT, MTRP, UNQ1846/PRO3574	Laptm4a, Mtrp	ABE	17ODYA
Q70UQ0	IKIP_HUMAN	Inhibitor of nuclear factor kappa-B kinase-interacting protein	1.75573	0.577282	57	2	Yes	8.47e-14	13.0719						Yes	Q9DBZ1	Yes	No	1	0	1	IKBIP, IKIP		17ODYA
P22090	RS4Y1_HUMAN	40S ribosomal protein S4, Y isoform 1	1.76125	0.436594	9	2	No	0.00121132	2.91674	1.2416	0.220945	21	2	Yes	No
P84085	ARF5_HUMAN	ADP-ribosylation factor 5	1.76671	0.589867	12	2	No	0.00113842	2.9437						Yes	P84084	Yes	Yes	2	1	3	ARF5	Arf5	ABE, 17ODYA	ABE
Q9NQC3	RTN4_HUMAN	Reticulon-4	1.77555	0.363295	80	2	Yes	3.92e-31	30.4063						Yes	Q99P72	Yes	Yes	5	2	7	RTN4, KIAA0886, NOGO, My043, SP1507	Rtn4, Kiaa0886, Nogo	ABE, 17ODYA	ABE, 17ODYA
P63027	VAMP2_HUMAN	Vesicle-associated membrane protein 2	1.77848	0.591884	67	2	Yes	4.36e-16	15.3604						Yes	P63044	Yes	Yes	3	2	5	VAMP2, SYB2	Vamp2, Syb2	ABE, 17ODYA	ABE, 17ODYA
Q14165	MLEC_HUMAN	Malectin	1.7963	0.44113	171	2	Yes	2.19e-55	54.6591						Yes	Q6ZQI3	Yes	Yes	10	5	15	MLEC, KIAA0152	Mlec, Kiaa0152, 2410014A08Rik	ABE, 17ODYA	17ODYA
P49257	LMAN1_HUMAN	Protein ERGIC-53	1.79743	0.213031	19	2	Yes	8.09e-12	11.092	1.92053	0.511465	7	1	n/a	Yes	Q9D0F3	Yes	Yes	1	1	2	LMAN1, ERGIC53, F5F8D	Lman1, Ergic53	17ODYA	17ODYA
Q01628	IFM3_HUMAN	Interferon-induced transmembrane protein 3	1.81048	0.553469	72	2	Yes	2.24e-19	18.6505						Yes	Q9CQW9	Yes	Yes	6	6	12	IFITM3	Ifitm3	ABE, 17ODYA	ABE, 17ODYA
O15260	SURF4_HUMAN	Surfeit locus protein 4	1.81119	0.337139	83	2	Yes	8.39e-36	35.0762	1.87052	0.460329	3	1	n/a	Yes	Q64310	Yes	Yes	6	1	7	SURF4, SURF-4	Surf4, Surf-4	ABE, 17ODYA	17ODYA
P12036	NFH_HUMAN	Neurofilament heavy polypeptide	1.82053	1.07061	35	2	Yes	7.23e-05	4.14101	1.81843	1.00944	55	2	Yes	No
Q8TD47	RS4Y2_HUMAN	40S ribosomal protein S4, Y isoform 2	1.83045	0.331297	6	1	n/a	0.00166465	2.77868	1.2416	0.220945	21	2	Yes	No
Q495X7	TRI60_HUMAN	Tripartite motif-containing protein 60	1.83247	0.0933431	4	1	n/a	0.000384259	3.41538						No
Q9Y490	TLN1_HUMAN	Talin-1	1.83781	0.54366	211	2	Yes	2.04e-57	56.6908	6.5689	2.19417	136	2	Yes	Yes	P26039	Yes	Yes	2	1	3	TLN1, KIAA1027, TLN	Tln1, Tln	17ODYA	ABE
Q9NRY6	PLS3_HUMAN	Phospholipid scramblase 3	1.86046	0.611032	28	2	Yes	6.52e-08	7.18548						Yes	Q9JIZ9	Yes	Yes	10	4	14	PLSCR3	Plscr3	ABE, 17ODYA	ABE, 17ODYA
P26038	MOES_HUMAN	Moesin	1.86104	1.01156	26	2	Yes	0.000222338	3.65299	4.74023	1.44698	73	2	Yes	Yes	P26041	Yes	Yes	4	1	5	MSN	Msn	ABE, 17ODYA	17ODYA
P60174	TPIS_HUMAN	Triosephosphate isomerase	1.87291	0.809218	25	2	No	1.77e-05	4.75286	5.51347	0.914238	200	2	Yes	Yes	P17751	Yes	Yes	3	2	5	TPI1, TPI	Tpi1, Tpi	17ODYA	ABE, 17ODYA
Q10472	GALT1_HUMAN	Polypeptide N-acetylgalactosaminyltransferase 1	1.88522	0.859158	8	2	Yes	0.0268319	1.57135						Yes	O08912	Yes	Yes	4	2	6	GALNT1	Galnt1	ABE, 17ODYA	17ODYA
Q00341	VIGLN_HUMAN	Vigilin	1.88991	0.341408	68	2	Yes	1.65e-31	30.7836	1.7963	0.0216017	6	1	n/a	Yes	Q8VDJ3	Yes	Yes	2	1	3	HDLBP, HBP, VGL	Hdlbp	ABE, 17ODYA	ABE
Q92896	GSLG1_HUMAN	Golgi apparatus protein 1	1.89314	0.526441	21	2	Yes	2.56e-07	6.59254						Yes	Q61543	Yes	Yes	4	5	9	GLG1, CFR1, ESL1, MG160	Glg1, Esl1, Mg160, Selel	ABE, 17ODYA	ABE, 17ODYA
P29692	EF1D_HUMAN	Elongation factor 1-delta	1.90263	0.302436	5	1	n/a	0.00262018	2.58167	1.99584	0.296929	86	2	Yes	Yes	P57776	Yes	Yes	4	1	5	EEF1D, EF1D	Eef1d	ABE, 17ODYA	ABE
Q8WTV0	SCRB1_HUMAN	Scavenger receptor class B member 1	1.91244	0.500296	47	2	Yes	3.05e-16	15.5155						Yes	Q61009	Yes	Yes	6	2	8	SCARB1, CD36L1, CLA1	Scarb1, Srb1	ABE, 17ODYA	ABE, 17ODYA
Q9NZM1	MYOF_HUMAN	Myoferlin	1.9125	0.382312	377	2	Yes	2.7e-157	156.569						Yes	Q69ZN7	Yes	Yes	6	3	9	MYOF, FER1L3, KIAA1207	Myof, Fer1l3, Kiaa1207	ABE, 17ODYA	ABE, 17ODYA
Q04637	IF4G1_HUMAN	Eukaryotic translation initiation factor 4 gamma 1	1.92518	0.693946	26	1	n/a	3.99e-07	6.39864						Yes	Q6NZJ6	Yes	Yes	1	1	2	EIF4G1, EIF4F, EIF4G, EIF4GI	Eif4g1	17ODYA	17ODYA
P18085	ARF4_HUMAN	ADP-ribosylation factor 4	1.93368	0.709857	17	2	No	7.05e-05	4.15155	2.57955	1.30189	12	2	Yes	Yes	P61750	Yes	Yes	3	3	6	ARF4, ARF2	Arf4	ABE, 17ODYA	ABE, 17ODYA
Q96TA1	NIBL1_HUMAN	Niban-like protein 1	1.93581	0.293993	16	2	No	4.36e-09	8.36088	5.87871	2.30742	25	2	Yes	Yes	Q8R1F1	Yes	No	1	0	1	FAM129B, C9orf88		17ODYA
Q7L2H7	EIF3M_HUMAN	Eukaryotic translation initiation factor 3 subunit M	1.94958	0.300405	8	1	n/a	4.45e-05	4.35134						Yes	Q99JX4	Yes	No	2	0	2	EIF3M, HFLB5, PCID1, GA17, PNAS-125		ABE, 17ODYA
P60033	CD81_HUMAN	CD81 antigen	1.95867	0.455145	66	2	Yes	1.44e-25	24.8414	1.62204	0.701169	5	1	n/a	Yes	P35762	Yes	Yes	8	3	11	CD81, TAPA1, TSPAN28	Cd81, Tapa1	ABE, 17ODYA	ABE, 17ODYA
Q9H0V9	LMA2L_HUMAN	VIP36-like protein	1.98025	0.0255802	4	1	n/a	4.9e-06	5.31019						No
Q5ZPR3	CD276_HUMAN	CD276 antigen	1.99014	0.2366	14	2	No	2.38e-09	8.62421						Yes	Q8VE98	Yes	No	4	0	4	CD276, B7H3, PSEC0249, UNQ309/PRO352		ABE, 17ODYA
Q14254	FLOT2_HUMAN	Flotillin-2	2.00334	0.456212	104	2	Yes	3.19e-41	40.4963						Yes	Q60634	Yes	Yes	11	5	16	FLOT2, ESA1, M17S1	Flot2, Esa1, M17s1	ABE, 17ODYA	ABE, 17ODYA
P15291	B4GT1_HUMAN	Beta-1,4-galactosyltransferase 1	2.00681	1.04168	42	2	Yes	2.01e-07	6.69631						Yes	P15535	Yes	Yes	8	1	9	B4GALT1, GGTB2	B4galt1, Ggtb, Ggtb2	ABE, 17ODYA	17ODYA
O94919	ENDD1_HUMAN	Endonuclease domain-containing 1 protein	2.00723	0.483562	33	2	Yes	3.74e-13	12.4267						Yes	Q8C522	Yes	No	1	0	1	ENDOD1, KIAA0830		17ODYA
Q9Y295	DRG1_HUMAN	Developmentally-regulated GTP-binding protein 1	2.0115	1.36374	3	1	n/a	0.327606	0.484648						No
O00220	TR10A_HUMAN	Tumor necrosis factor receptor superfamily member 10A	2.0237	0.213372	8	1	n/a	2.78e-06	5.55671						Yes	-	Yes	No	3	0	3	TNFRSF10A, APO2, DR4, TRAILR1		ABE, 17ODYA
Q03135	CAV1_HUMAN	Caveolin-1	2.03539	0.486873	176	2	Yes	8.01e-67	66.0962	1.19903	0.222014	29	2	Yes	Yes	P49817	Yes	Yes	5	2	7	CAV1, CAV	Cav1, Cav	ABE, 17ODYA	ABE, 17ODYA
Q9NRQ2	PLS4_HUMAN	Phospholipid scramblase 4	2.0492	0.00727319	4	1	n/a	9.18e-08	7.03704						Yes	P58196	Yes	No	3	0	3	PLSCR4, GIG43		ABE, 17ODYA
Q969X5	ERGI1_HUMAN	Endoplasmic reticulum-Golgi intermediate compartment protein 1	2.05531	0.392	112	2	Yes	1.35e-52	51.869						Yes	Q9DC16	Yes	Yes	4	4	8	ERGIC1, ERGIC32, KIAA1181, HT034	Ergic1, Ergic32	ABE, 17ODYA	ABE, 17ODYA
Q6ZT21	TMPPE_HUMAN	Transmembrane protein with metallophosphoesterase domain	2.06287	0.725262	3	1	n/a	0.126433	0.898139						Yes	-	Yes	No	3	0	3	TMPPE		ABE, 17ODYA
Q9GZU1	MCLN1_HUMAN	Mucolipin-1	2.09503	0.18423	5	1	n/a	0.000185243	3.73226						Yes	Q99J21	Yes	Yes	2	1	3	MCOLN1, ML4, MSTP080	Mcoln1	17ODYA	17ODYA
P17661	DESM_HUMAN	Desmin	2.14972	0.484666	56	2	Yes	3.37e-24	23.4724	2.23949	0.332238	93	2	Yes	Yes	P31001	Yes	No	1	0	1	DES		ABE
P08670	VIME_HUMAN	Vimentin	2.1685	0.550546	508	2	Yes	6.79e-190	189.168	2.19341	0.416499	984	2	Yes	Yes	P20152	Yes	Yes	2	1	3	VIM	Vim	17ODYA	ABE
B7ZC32	KIF28_HUMAN	Kinesin-like protein KIF28P	2.174	0.382011	6	1	n/a	0.000654888	3.18383						No
P07197	NFM_HUMAN	Neurofilament medium polypeptide	2.17428	0.537565	35	2	Yes	1.84e-14	13.7358	2.31629	0.287626	66	2	Yes	Yes	P08553	No	Yes	0	1	1		Nefm, Nef3, Nfm		ABE
P13987	CD59_HUMAN	CD59 glycoprotein	2.19799	0.313731	38	2	Yes	1.87e-23	22.7293	3.89682	0.577683	45	2	Yes	Yes	-	Yes	No	2	0	2	CD59, MIC11, MIN1, MIN2, MIN3, MSK21		17ODYA
P15941	MUC1_HUMAN	Mucin-1	2.20885	0.64849	36	2	Yes	6.15e-13	12.211						Yes	Q02496	Yes	No	2	0	2	MUC1, PUM		ABE
P07196	NFL_HUMAN	Neurofilament light polypeptide	2.23893	0.522462	33	2	Yes	1.25e-14	13.9014	2.32659	0.273046	41	2	Yes	Yes	P08551	No	Yes	0	1	1		Nefl, Nf68, Nfl		ABE
Q14764	MVP_HUMAN	Major vault protein	2.24898	0.702471	37	2	Yes	1.05e-12	11.9791	4.73516	2.06364	11	2	No	Yes	Q9EQK5	Yes	No	1	0	1	MVP, LRP		17ODYA
O60664	PLIN3_HUMAN	Perilipin-3	2.25529	0.415148	38	2	Yes	4.45e-20	19.3519	6.77853	1.99524	54	2	Yes	Yes	Q9DBG5	Yes	No	1	0	1	PLIN3, M6PRBP1, TIP47		17ODYA
O95837	GNA14_HUMAN	Guanine nucleotide-binding protein subunit alpha-14	2.26329	0.410391	48	2	Yes	1.73e-25	24.7613						Yes	P30677	Yes	Yes	1	3	4	GNA14	Gna14, Gna-14	ABE	ABE, 17ODYA
Q10471	GALT2_HUMAN	Polypeptide N-acetylgalactosaminyltransferase 2	2.27541	0.459964	90	2	Yes	1.82e-43	42.7406						Yes	Q6PB93	Yes	Yes	1	2	3	GALNT2	Galnt2	17ODYA	17ODYA
Q92782	DPF1_HUMAN	Zinc finger protein neuro-d4	2.28906	1.30463	3	1	n/a	0.22914	0.639899						No
P29992	GNA11_HUMAN	Guanine nucleotide-binding protein subunit alpha-11	2.29457	0.479055	74	2	Yes	3.38e-35	34.4709						Yes	P21278	Yes	Yes	9	4	13	GNA11, GA11	Gna11, Gna-11	ABE, 17ODYA	17ODYA
Q16352	AINX_HUMAN	Alpha-internexin	2.30274	0.509996	31	2	Yes	1.32e-14	13.881	2.31629	0.287626	66	2	Yes	Yes	P46660	No	Yes	0	1	1		Ina		ABE
O75396	SC22B_HUMAN	Vesicle-trafficking protein SEC22b	2.30397	0.4086	15	2	Yes	1.46e-08	7.8342	3.32835	1.05834	4	1	n/a	Yes	O08547	Yes	Yes	3	3	6	SEC22B, SEC22L1	Sec22b, Sec22l1	ABE, 17ODYA	ABE, 17ODYA
Q13308	PTK7_HUMAN	Inactive tyrosine-protein kinase 7	2.32405	0.769297	64	2	Yes	1.61e-20	19.7937						Yes	Q8BKG3	Yes	Yes	4	1	5	PTK7, CCK4	Ptk7	ABE, 17ODYA	17ODYA
Q9P2E9	RRBP1_HUMAN	Ribosome-binding protein 1	2.33493	0.729384	73	2	Yes	1.08e-24	23.9677	1.93023	0.338156	78	2	Yes	Yes	Q99PL5	Yes	Yes	1	1	2	RRBP1, KIAA1398	Rrbp1	17ODYA	17ODYA
P35241	RADI_HUMAN	Radixin	2.36807	0.460017	3	1	n/a	0.0356837	1.44753	4.36611	0.801549	9	1	n/a	Yes	P26043	No	Yes	0	1	1		Rdx		17ODYA
Q14118	DAG1_HUMAN	Dystroglycan	2.4075	1.10429	13	2	No	0.00077052	3.11322						Yes	Q62165	Yes	Yes	4	2	6	DAG1	Dag1, Dag-1	ABE, 17ODYA	17ODYA
Q14534	ERG1_HUMAN	Squalene monooxygenase	2.44095	0.996529	52	2	No	3.86e-14	13.4131						Yes	P52019	No	Yes	0	1	1		Sqle, Erg1		17ODYA
P08962	CD63_HUMAN	CD63 antigen	2.4578	0.386524	9	2	Yes	9.43e-06	5.02568						Yes	P41731	Yes	Yes	10	2	12	CD63, MLA1, TSPAN30	Cd63	ABE, 17ODYA	ABE, 17ODYA
Q15436	SC23A_HUMAN	Protein transport protein Sec23A	2.47149	0.520602	22	2	Yes	2.29e-11	10.6398						Yes	Q01405	Yes	Yes	1	1	2	SEC23A	Sec23a, Sec23, Sec23r	17ODYA	17ODYA
Q9NRR3	C42S2_HUMAN	CDC42 small effector protein 2	2.47155	0.558035	16	2	No	4.8e-08	7.31834						Yes	Q8BGH7	Yes	Yes	4	5	9	CDC42SE2, SPEC2	Cdc42se2	ABE, 17ODYA	ABE, 17ODYA
O15121	DEGS1_HUMAN	Sphingolipid delta(4)-desaturase DES1	2.48854	1.22289	20	2	Yes	3.59e-05	4.44478						Yes	O09005	Yes	Yes	1	2	3	DEGS1, DES1, MLD, MIG15	Degs1, Degs, Des1, Mdes	17ODYA	17ODYA
P13645	K1C10_HUMAN	Keratin, type I cytoskeletal 10	2.49346	2.45946	67	1	n/a	5.02e-06	5.29958	0.852634	0.496869	49	2	No	Yes	P02535	Yes	No	1	0	1	KRT10, KPP		17ODYA
P49795	RGS19_HUMAN	Regulator of G-protein signaling 19	2.51879	0.919578	3	1	n/a	0.10356	0.984807						Yes	Q9CX84	Yes	Yes	6	4	10	RGS19, GAIP, GNAI3IP	Rgs19	ABE, 17ODYA	ABE, 17ODYA
P62070	RRAS2_HUMAN	Ras-related protein R-Ras2	2.53329	0.966614	65	2	Yes	3.63e-19	18.4397						Yes	P62071	Yes	Yes	9	4	13	RRAS2, TC21	Rras2	ABE, 17ODYA	ABE, 17ODYA
Q15165	PON2_HUMAN	Serum paraoxonase/arylesterase 2	2.56818	0.628999	21	2	Yes	5.91e-10	9.22836	5.23643	1.35374	33	2	No	No
Q02809	PLOD1_HUMAN	Procollagen-lysine,2-oxoglutarate 5-dioxygenase 1	2.65801	0.0534738	10	2	Yes	1.31e-13	12.8836						No
Q8N680	ZBTB2_HUMAN	Zinc finger and BTB domain-containing protein 2	2.67215	0.168849	3	1	n/a	0.00338158	2.47088						No
Q13740	CD166_HUMAN	CD166 antigen	2.68117	1.04531	21	2	Yes	5.54e-07	6.25641	2.77646	0.746843	28	2	No	Yes	Q61490	Yes	No	1	0	1	ALCAM, MEMD		17ODYA
Q07065	CKAP4_HUMAN	Cytoskeleton-associated protein 4	2.7593	0.87116	587	2	Yes	6.21e-209	208.207	1.6258	0.262592	126	2	Yes	Yes	Q8BMK4	Yes	Yes	9	5	14	CKAP4	Ckap4	ABE, 17ODYA	ABE, 17ODYA
Q08380	LG3BP_HUMAN	Galectin-3-binding protein	2.84379	2.96311	5	1	n/a	0.236495	0.626178						No
O75955	FLOT1_HUMAN	Flotillin-1	2.86384	0.759574	165	2	Yes	2.99e-71	70.5247						Yes	O08917	Yes	Yes	10	6	16	FLOT1	Flot1	ABE, 17ODYA	ABE, 17ODYA
P02786	TFR1_HUMAN	Transferrin receptor protein 1	2.97602	0.807146	502	2	Yes	1.1e-213	212.959						Yes	Q62351	Yes	Yes	11	5	16	TFRC	Tfrc, Trfr	ABE, 17ODYA	ABE, 17ODYA
O43505	B4GA1_HUMAN	Beta-1,4-glucuronyltransferase 1	3.00807	1.15854	11	2	No	0.000276772	3.55788						Yes	Q8BWP8	Yes	No	3	0	3	B4GAT1, B3GNT1, B3GNT6		17ODYA
P10301	RRAS_HUMAN	Ras-related protein R-Ras	3.29282	1.36945	50	2	Yes	7.61e-16	15.1187						Yes	P10833	Yes	Yes	10	5	15	RRAS	Rras	ABE, 17ODYA	ABE, 17ODYA
Q6K0P9	IFIX_HUMAN	Pyrin and HIN domain-containing protein 1	3.35882	0.677963	3	1	n/a	0.0264484	1.5776						No
P15144	AMPN_HUMAN	Aminopeptidase N	3.38181	0.891945	658	2	Yes	4.14e-301	300.383	2.34018	0.410658	372	2	Yes	No
Q8IUC4	RHPN2_HUMAN	Rhophilin-2	3.41603	1.58341	4	1	n/a	0.0553545	1.25685						No
P21397	AOFA_HUMAN	Amine oxidase [flavin-containing] A	3.47805	0.543104	21	1	n/a	4.61e-15	14.3359						No
O60831	PRAF2_HUMAN	PRA1 family protein 2	3.65684	0.534513	3	2	No	0.0736156	1.13303						Yes	Q9JIG8	Yes	Yes	5	4	9	PRAF2, JM4	Praf2, DXImx39e	ABE, 17ODYA	ABE, 17ODYA
Q96QD8	S38A2_HUMAN	Sodium-coupled neutral amino acid transporter 2	3.72848	1.43699	74	2	Yes	6.44e-26	25.1914						Yes	Q8CFE6	Yes	Yes	6	4	10	SLC38A2, ATA2, KIAA1382, SAT2, SNAT2	Slc38a2, Ata2, Kiaa1382, Sat2, Snat2	ABE, 17ODYA	17ODYA
Q13421	MSLN_HUMAN	Mesothelin	4.22584	0.333515	4	1	n/a	0.000301742	3.52036						No
P08758	ANXA5_HUMAN	Annexin A5	4.27161	1.43013	123	2	Yes	2.84e-50	49.5459	8.24895	2.17649	52	2	Yes	Yes	P48036	Yes	Yes	1	1	2	ANXA5, ANX5, ENX2, PP4	Anxa5, Anx5	17ODYA	ABE
O15162	PLS1_HUMAN	Phospholipid scramblase 1	4.60087	0.687921	19	2	Yes	3.44e-14	13.4634						Yes	Q9JJ00	Yes	Yes	8	3	11	PLSCR1	Plscr1, Tra1b, Tras1	ABE, 17ODYA	ABE, 17ODYA
P02751	FINC_HUMAN	Fibronectin	4.98291	2.94194	11	2	No	0.00151015	2.82098						Yes	P11276	No	Yes	0	1	1		Fn1		17ODYA
P21589	5NTD_HUMAN	5'-nucleotidase	5.89659	1.72642	126	2	Yes	1.58e-61	60.8002	3.03426	0.659913	24	2	Yes	Yes	Q61503	Yes	No	1	0	1	NT5E, NT5, NTE		17ODYA
O00469	PLOD2_HUMAN	Procollagen-lysine,2-oxoglutarate 5-dioxygenase 2	7.90783	2.61909	32	2	Yes	2.02e-15	14.6944	8.13271	1.90361	43	2	Yes	Yes	Q9R0B9	Yes	No	1	0	1	PLOD2		17ODYA
P08133	ANXA6_HUMAN	Annexin A6	8.89584	9.04057	5	2	No	0.145855	0.836079						Yes	P14824	Yes	Yes	2	2	4	ANXA6, ANX6	Anxa6, Anx6	17ODYA	ABE, 17ODYA
O14786	NRP1_HUMAN	Neuropilin-1	10.9321	10.1694	13	2	No	0.0047865	2.31998						Yes	P97333	Yes	Yes	1	2	3	NRP1, NRP, VEGF165R	Nrp1, Nrp	ABE	17ODYA
Q9H999	PANK3_HUMAN	Pantothenate kinase 3	20.4153	0.499928	3	1	n/a	0.000220934	3.65574						No
P43121	MUC18_HUMAN	Cell surface glycoprotein MUC18	29.3408	11.8037	17	2	No	5.71e-08	7.24371						Yes	Q8R2Y2	Yes	Yes	4	2	6	MCAM, MUC18	Mcam, Muc18	ABE	ABE, 17ODYA

## Sheet: Table S3 - Unique Proteins
Supplementary Table 3. List of unique proteins found in 17-ODYA enrichment and unenriched analysis MCF10a cells transduced with Snail or empty vector
Protein Entry: Uniprot protein entry term
Uniprot Accession: Uniprot protein accession
Protein Description: Protein Name
# SILAC Pairs: Total number of quantified MS1 SILAC pairs found in analysis
Direction: Denotes the labeling direction the protein was identified in as a unique protein
Unique In: Denotes the experiment the protein was found to be unique in
Protein Entry	Uniprot Accession	Protein Description	# SILAC Pairs	Direction	Unique In
Q8WXH4	ASB11_HUMAN	Ankyrin repeat and SOCS box protein 11	3	Snail Light	SNAIL - Palmitoylation
P20933	ASPG_HUMAN	N(4)-(beta-N-acetylglucosaminyl)-L-asparaginase	2	Snail Heavy	SNAIL - Palmitoylation
P80723	BASP1_HUMAN	Brain acid soluble protein 1	3	Snail Heavy	SNAIL - Palmitoylation
Q9UKI2	BORG2_HUMAN	Cdc42 effector protein 3	3	Snail Light	SNAIL - Palmitoylation
Q9BXI9	C1QT6_HUMAN	Complement C1q tumor necrosis factor-related protein 6	5	Snail Light	SNAIL - Palmitoylation
Q8N801	CB061_HUMAN	Uncharacterized protein C2orf61	3	Snail Light	SNAIL - Palmitoylation
P16152	CBR1_HUMAN	Carbonyl reductase [NADPH] 1	6	Snail Light	SNAIL - Palmitoylation
P14209	CD99_HUMAN	CD99 antigen	2	Snail Light	SNAIL - Palmitoylation
O15519	CFLAR_HUMAN	CASP8 and FADD-like apoptosis regulator	4	Snail Heavy	SNAIL - Palmitoylation
Q9Y696	CLIC4_HUMAN	Chloride intracellular channel protein 4	5	Snail Light	SNAIL - Palmitoylation
Q9BSU1	CP070_HUMAN	UPF0183 protein C16orf70	7	Snail Light	SNAIL - Palmitoylation
Q9BSY9	DESI2_HUMAN	Desumoylating isopeptidase 2	2	Snail Heavy	SNAIL - Palmitoylation
O95571	ETHE1_HUMAN	Persulfide dioxygenase ETHE1, mitochondrial	3	Snail Light	SNAIL - Palmitoylation
Q6P4D5	F222C_HUMAN	Protein FAM122C	3	Snail Light	SNAIL - Palmitoylation
Q9UBI6	GBG12_HUMAN	Guanine nucleotide-binding protein G(I)/G(S)/G(O) subunit gamma-12	4	Snail Light	SNAIL - Palmitoylation
Q5YKI7	GGNB1_HUMAN	Putative gametogenetin-binding protein 1	2	Snail Light	SNAIL - Palmitoylation
Q8N0V5	GNT2A_HUMAN	N-acetyllactosaminide beta-1,6-N-acetylglucosaminyl-transferase, isoform A	5	Snail Light	SNAIL - Palmitoylation
Q9NZH8	IL36G_HUMAN	Interleukin-36 gamma	3	Snail Light	SNAIL - Palmitoylation
Q9NXV2	KCTD5_HUMAN	BTB/POZ domain-containing protein KCTD5	5	Snail Light	SNAIL - Palmitoylation
O75525	KHDR3_HUMAN	KH domain-containing, RNA-binding, signal transduction-associated protein 3	2	Snail Heavy	SNAIL - Palmitoylation
P04208	LV106_HUMAN	Ig lambda chain V-I region WAH	1	Snail Light	SNAIL - Palmitoylation
Q3C1V0	M4A18_HUMAN	Membrane-spanning 4-domains subfamily A member 18	1	Snail Light	SNAIL - Palmitoylation
Q99542	MMP19_HUMAN	Matrix metalloproteinase-19	4	Snail Light	SNAIL - Palmitoylation
O43193	MTLR_HUMAN	Motilin receptor	3	Snail Light	SNAIL - Palmitoylation
Q8TDC0	MYOZ3_HUMAN	Myozenin-3	5	Snail Light	SNAIL - Palmitoylation
P0CAP1	MYZAP_HUMAN	Myocardial zonula adherens protein	6	Snail Light	SNAIL - Palmitoylation
Q9P0J0	NDUAD_HUMAN	NADH dehydrogenase [ubiquinone] 1 alpha subcomplex subunit 13	3	Snail Light	SNAIL - Palmitoylation
P55209	NP1L1_HUMAN	Nucleosome assembly protein 1-like 1	2	Snail Heavy	SNAIL - Palmitoylation
Q8NGE8	OR4D9_HUMAN	Olfactory receptor 4D9	1	Snail Light	SNAIL - Palmitoylation
P50479	PDLI4_HUMAN	PDZ and LIM domain protein 4	3	Snail Light	SNAIL - Palmitoylation
Q13951	PEBB_HUMAN	Core-binding factor subunit beta	5	Snail Light	SNAIL - Palmitoylation
Q53GL0	PKHO1_HUMAN	Pleckstrin homology domain-containing family O member 1	6	Snail Light	SNAIL - Palmitoylation
A1L4L8	PL8L1_HUMAN	PLAC8-like protein 1	2	Snail Light	SNAIL - Palmitoylation
Q04941	PLP2_HUMAN	Proteolipid protein 2	11	Snail Light	SNAIL - Palmitoylation
P54278	PMS2_HUMAN	Mismatch repair endonuclease PMS2	1	Snail Heavy	SNAIL - Palmitoylation
Q8TAE6	PP14C_HUMAN	Protein phosphatase 1 regulatory subunit 14C	2	Snail Light	SNAIL - Palmitoylation
Q06830	PRDX1_HUMAN	Peroxiredoxin-1	2	Snail Light	SNAIL - Palmitoylation
Q13046	PSG7_HUMAN	Putative pregnancy-specific beta-1-glycoprotein 7	4	Snail Light	SNAIL - Palmitoylation
P20336	RAB3A_HUMAN	Ras-related protein Rab-3A	3	Snail Light	SNAIL - Palmitoylation
P20337	RAB3B_HUMAN	Ras-related protein Rab-3B	2	Snail Light	SNAIL - Palmitoylation
Q96E17	RAB3C_HUMAN	Ras-related protein Rab-3C	2	Snail Light	SNAIL - Palmitoylation
Q8IYK8	REM2_HUMAN	GTP-binding protein REM 2	3	Snail Light	SNAIL - Palmitoylation
P62750	RL23A_HUMAN	60S ribosomal protein L23a	1	Snail Light	SNAIL - Palmitoylation
O15514	RPB4_HUMAN	DNA-directed RNA polymerase II subunit RPB4	4	Snail Light	SNAIL - Palmitoylation
Q15043	S39AE_HUMAN	Zinc transporter ZIP14	3	Snail Light	SNAIL - Palmitoylation
Q9Y6B6	SAR1B_HUMAN	GTP-binding protein SAR1b	1	Snail Heavy	SNAIL - Palmitoylation
Q9HAU4	SMUF2_HUMAN	E3 ubiquitin-protein ligase SMURF2	3	Snail Heavy	SNAIL - Palmitoylation
A6NNZ2	TBB8L_HUMAN	Tubulin beta-8 chain-like protein LOC260334	6	Snail Light	SNAIL - Palmitoylation
P13805	TNNT1_HUMAN	Troponin T, slow skeletal muscle	3	Snail Light	SNAIL - Palmitoylation
P62256	UBE2H_HUMAN	Ubiquitin-conjugating enzyme E2 H	3	Snail Heavy	SNAIL - Palmitoylation
O75795	UDB17_HUMAN	UDP-glucuronosyltransferase 2B17	2	Snail Light	SNAIL - Palmitoylation
Q8NBZ7	UXS1_HUMAN	UDP-glucuronic acid decarboxylase 1	2	Snail Light	SNAIL - Palmitoylation
Q96GC9	VMP1_HUMAN	Vacuole membrane protein 1	1	Snail Heavy	SNAIL - Palmitoylation
Q9UKU0	ACSL6_HUMAN	Long-chain-fatty-acid--CoA ligase 6	3	EV Light	Empty Vector - Palmitoylation
Q96Q83	ALKB3_HUMAN	Alpha-ketoglutarate-dependent dioxygenase alkB homolog 3	4	EV Light	Empty Vector - Palmitoylation
Q14155	ARHG7_HUMAN	Rho guanine nucleotide exchange factor 7	5	EV Light	Empty Vector - Palmitoylation
Q92485	ASM3B_HUMAN	Acid sphingomyelinase-like phosphodiesterase 3b	7	EV Light	Empty Vector - Palmitoylation
O75052	CAPON_HUMAN	Carboxyl-terminal PDZ ligand of neuronal nitric oxide synthase protein	6	EV Light	Empty Vector - Palmitoylation
P47710	CASA1_HUMAN	Alpha-S1-casein	1	EV Light	Empty Vector - Palmitoylation
A6NI87	CBY3_HUMAN	Protein chibby homolog 3	1	EV Light	Empty Vector - Palmitoylation
Q9BUN5	CC28B_HUMAN	Coiled-coil domain-containing protein 28B	2	EV Light	Empty Vector - Palmitoylation
Q9BSQ5	CCM2_HUMAN	Cerebral cavernous malformations 2 protein	2	EV Light	Empty Vector - Palmitoylation
P32970	CD70_HUMAN	CD70 antigen	8	EV Light	Empty Vector - Palmitoylation
P0C854	CECR9_HUMAN	Putative cat eye syndrome critical region protein 9	2	EV Light	Empty Vector - Palmitoylation
O95832	CLD1_HUMAN	Claudin-1	8	EV Light	Empty Vector - Palmitoylation
Q8IYJ1	CPNE9_HUMAN	Copine-9	5	EV Light	Empty Vector - Palmitoylation
Q5T6F0	DCA12_HUMAN	DDB1- and CUL4-associated factor 12	3	EV Light	Empty Vector - Palmitoylation
P81605	DCD_HUMAN	Dermcidin	1	EV Light	Empty Vector - Palmitoylation
Q9BTE1	DCTN5_HUMAN	Dynactin subunit 5	3	EV Light	Empty Vector - Palmitoylation
Q9BUN8	DERL1_HUMAN	Derlin-1	2	EV Light	Empty Vector - Palmitoylation
Q8N5I4	DHRSX_HUMAN	Dehydrogenase/reductase SDR family member on chromosome X	2	EV Light	Empty Vector - Palmitoylation
Q68CQ4	DIEXF_HUMAN	Digestive organ expansion factor homolog	9	EV Light	Empty Vector - Palmitoylation
P31689	DNJA1_HUMAN	DnaJ homolog subfamily A member 1	2	EV Light	Empty Vector - Palmitoylation
P10768	ESTD_HUMAN	S-formylglutathione hydrolase	3	EV Light	Empty Vector - Palmitoylation
A8MZ36	EVPLL_HUMAN	Envoplakin-like protein	5	EV Light	Empty Vector - Palmitoylation
P16118	F261_HUMAN	6-phosphofructo-2-kinase/fructose-2,6-bisphosphatase 1	6	EV Light	Empty Vector - Palmitoylation
Q14802	FXYD3_HUMAN	FXYD domain-containing ion transport regulator 3	3	EV Light	Empty Vector - Palmitoylation
O14653	GOSR2_HUMAN	Golgi SNAP receptor complex member 2	1	EV Light	Empty Vector - Palmitoylation
Q9NQ84	GPC5C_HUMAN	G-protein coupled receptor family C group 5 member C	2	EV Light	Empty Vector - Palmitoylation
O43824	GTPB6_HUMAN	Putative GTP-binding protein 6	3	EV Light	Empty Vector - Palmitoylation
Q96QV6	H2A1A_HUMAN	Histone H2A type 1-A	13	EV Light	Empty Vector - Palmitoylation
Q8IUE6	H2A2B_HUMAN	Histone H2A type 2-B	10	EV Light	Empty Vector - Palmitoylation
Q71UI9	H2AV_HUMAN	Histone H2A.V	13	EV Light	Empty Vector - Palmitoylation
P16104	H2AX_HUMAN	Histone H2AX	13	EV Light	Empty Vector - Palmitoylation
P0C0S5	H2AZ_HUMAN	Histone H2A.Z	13	EV Light	Empty Vector - Palmitoylation
Q9NV31	IMP3_HUMAN	U3 small nucleolar ribonucleoprotein protein IMP3	1	EV Light	Empty Vector - Palmitoylation
Q06033	ITIH3_HUMAN	Inter-alpha-trypsin inhibitor heavy chain H3	7	EV Light	Empty Vector - Palmitoylation
P13645	K1C10_HUMAN	Keratin, type I cytoskeletal 10	83	EV Light	Empty Vector - Palmitoylation
Q7Z3Y8	K1C27_HUMAN	Keratin, type I cytoskeletal 27	12	EV Light	Empty Vector - Palmitoylation
Q7Z3Y7	K1C28_HUMAN	Keratin, type I cytoskeletal 28	19	EV Light	Empty Vector - Palmitoylation
P18428	LBP_HUMAN	Lipopolysaccharide-binding protein	3	EV Light	Empty Vector - Palmitoylation
P14174	MIF_HUMAN	Macrophage migration inhibitory factor	1	EV Light	Empty Vector - Palmitoylation
Q8N183	MIMIT_HUMAN	Mimitin, mitochondrial	4	EV Light	Empty Vector - Palmitoylation
Q1L6U9	MSMP_HUMAN	Prostate-associated microseminoprotein	3	EV Light	Empty Vector - Palmitoylation
O95182	NDUA7_HUMAN	NADH dehydrogenase [ubiquinone] 1 alpha subcomplex subunit 7	2	EV Light	Empty Vector - Palmitoylation
O96000	NDUBA_HUMAN	NADH dehydrogenase [ubiquinone] 1 beta subcomplex subunit 10	12	EV Light	Empty Vector - Palmitoylation
O00712	NFIB_HUMAN	Nuclear factor 1 B-type	1	EV Light	Empty Vector - Palmitoylation
O75323	NIPS2_HUMAN	Protein NipSnap homolog 2	1	EV Light	Empty Vector - Palmitoylation
P61916	NPC2_HUMAN	Epididymal secretory protein E1	3	EV Light	Empty Vector - Palmitoylation
O95478	NSA2_HUMAN	Ribosome biogenesis protein NSA2 homolog	3	EV Light	Empty Vector - Palmitoylation
Q96C36	P5CR2_HUMAN	Pyrroline-5-carboxylate reductase 2	2	EV Light	Empty Vector - Palmitoylation
O14832	PAHX_HUMAN	Phytanoyl-CoA dioxygenase, peroxisomal	2	EV Light	Empty Vector - Palmitoylation
O75340	PDCD6_HUMAN	Programmed cell death protein 6	3	EV Light	Empty Vector - Palmitoylation
P62140	PP1B_HUMAN	Serine/threonine-protein phosphatase PP1-beta catalytic subunit	5	EV Light	Empty Vector - Palmitoylation
P15309	PPAP_HUMAN	Prostatic acid phosphatase	3	EV Heavy	Empty Vector - Palmitoylation
P45877	PPIC_HUMAN	Peptidyl-prolyl cis-trans isomerase C	1	EV Light	Empty Vector - Palmitoylation
P30405	PPIF_HUMAN	Peptidyl-prolyl cis-trans isomerase F, mitochondrial	1	EV Light	Empty Vector - Palmitoylation
P49768	PSN1_HUMAN	Presenilin-1	3	EV Light	Empty Vector - Palmitoylation
P57729	RAB38_HUMAN	Ras-related protein Rab-38	1	EV Light	Empty Vector - Palmitoylation
O60216	RAD21_HUMAN	Double-strand-break repair protein rad21 homolog	4	EV Light	Empty Vector - Palmitoylation
Q06609	RAD51_HUMAN	DNA repair protein RAD51 homolog 1	2	EV Light	Empty Vector - Palmitoylation
Q96T37	RBM15_HUMAN	Putative RNA-binding protein 15	6	EV Light	Empty Vector - Palmitoylation
Q9NWU5	RM22_HUMAN	39S ribosomal protein L22, mitochondrial	3	EV Light	Empty Vector - Palmitoylation
Q13084	RM28_HUMAN	39S ribosomal protein L28, mitochondrial	1	EV Light	Empty Vector - Palmitoylation
Q8N7X1	RMXL3_HUMAN	RNA-binding motif protein, X-linked-like-3	5	EV Light	Empty Vector - Palmitoylation
Q9H9Y2	RPF1_HUMAN	Ribosome production factor 1	6	EV Light	Empty Vector - Palmitoylation
Q15050	RRS1_HUMAN	Ribosome biogenesis regulatory protein homolog	6	EV Light	Empty Vector - Palmitoylation
Q5JNZ5	RS26L_HUMAN	Putative 40S ribosomal protein S26-like 1	5	EV Light	Empty Vector - Palmitoylation
P09661	RU2A_HUMAN	U2 small nuclear ribonucleoprotein A'	4	EV Light	Empty Vector - Palmitoylation
P29034	S10A2_HUMAN	Protein S100-A2	3	EV Light	Empty Vector - Palmitoylation
Q99808	S29A1_HUMAN	Equilibrative nucleoside transporter 1	2	EV Light	Empty Vector - Palmitoylation
Q8WTS6	SETD7_HUMAN	Histone-lysine N-methyltransferase SETD7	3	EV Light	Empty Vector - Palmitoylation
Q9BRL6	SRSF8_HUMAN	Serine/arginine-rich splicing factor 8	1	EV Light	Empty Vector - Palmitoylation
Q8IYB8	SUV3_HUMAN	ATP-dependent RNA helicase SUPV3L1, mitochondrial	9	EV Light	Empty Vector - Palmitoylation
Q9UJT1	TBD_HUMAN	Tubulin delta chain	1	EV Light	Empty Vector - Palmitoylation
Q969Z0	TBRG4_HUMAN	Protein TBRG4	4	EV Light	Empty Vector - Palmitoylation
Q9BVC6	TM109_HUMAN	Transmembrane protein 109	4	EV Light	Empty Vector - Palmitoylation
Q15388	TOM20_HUMAN	Mitochondrial import receptor subunit TOM20 homolog	3	EV Light	Empty Vector - Palmitoylation
Q9UDY6	TRI10_HUMAN	Tripartite motif-containing protein 10	5	EV Light	Empty Vector - Palmitoylation
Q9NZI7	UBIP1_HUMAN	Upstream-binding protein 1	3	EV Light	Empty Vector - Palmitoylation
Q9HBJ7	UBP29_HUMAN	Ubiquitin carboxyl-terminal hydrolase 29	1	EV Light	Empty Vector - Palmitoylation
Q9BRG1	VPS25_HUMAN	Vacuolar protein-sorting-associated protein 25	4	EV Light	Empty Vector - Palmitoylation
Q9H0C1	ZMY12_HUMAN	Zinc finger MYND domain-containing protein 12	4	EV Light	Empty Vector - Palmitoylation
Q8N859	ZN713_HUMAN	Zinc finger protein 713	5	EV Light	Empty Vector - Palmitoylation
Q7Z2E3	APTX_HUMAN	Aprataxin	7	Snail Light	Snail - Unenriched
Q00973	B4GN1_HUMAN	Beta-1,4 N-acetylgalactosaminyltransferase 1	2	Snail Light	Snail - Unenriched
P07711	CATL1_HUMAN	Cathepsin L1	3	Snail Light	Snail - Unenriched
Q15370	ELOB_HUMAN	Transcription elongation factor B polypeptide 2	4	Snail Heavy	Snail - Unenriched
O76003	GLRX3_HUMAN	Glutaredoxin-3	6	Snail Light	Snail - Unenriched
P38405	GNAL_HUMAN	Guanine nucleotide-binding protein G(olf) subunit alpha	4	Snail Light	Snail - Unenriched
Q5JWF2	GNAS1_HUMAN	Guanine nucleotide-binding protein G(s) subunit alpha isoforms XLas	4	Snail Light	Snail - Unenriched
P63092	GNAS2_HUMAN	Guanine nucleotide-binding protein G(s) subunit alpha isoforms short	4	Snail Light	Snail - Unenriched
Q16655	MAR1_HUMAN	Melanoma antigen recognized by T-cells 1	1	Snail Heavy	Snail - Unenriched
Q14696	MESD_HUMAN	LDLR chaperone MESD	5	Snail Light	Snail - Unenriched
Q02750	MP2K1_HUMAN	Dual specificity mitogen-activated protein kinase kinase 1	4	Snail Light	Snail - Unenriched
Q9NQR4	NDUAD_HUMAN	NADH dehydrogenase [ubiquinone] 1 alpha subcomplex subunit 13	4	Snail Light	Snail - Unenriched
Q96RD6	NIT2_HUMAN	Omega-amidase NIT2	7	Snail Light	Snail - Unenriched
Q15121	PANX2_HUMAN	Pannexin-2	7	Snail Light	Snail - Unenriched
P61758	PEA15_HUMAN	Astrocytic phosphoprotein PEA-15	3	Snail Light	Snail - Unenriched
P28070	PFD3_HUMAN	Prefoldin subunit 3	3	Snail Light	Snail - Unenriched
P78317	PLP2_HUMAN	Proteolipid protein 2	2	Snail Light	Snail - Unenriched
Q9Y676	PPIC_HUMAN	Peptidyl-prolyl cis-trans isomerase C	1	Snail Heavy	Snail - Unenriched
Q9HB58	PSB4_HUMAN	Proteasome subunit beta type-4	5	Snail Light	Snail - Unenriched
P63313	RNF4_HUMAN	E3 ubiquitin-protein ligase RNF4	1	Snail Heavy	Snail - Unenriched
P68036	RT18B_HUMAN	28S ribosomal protein S18b, mitochondrial	4	Snail Light	Snail - Unenriched
O95785	SP110_HUMAN	Sp110 nuclear body protein	4	Snail Light	Snail - Unenriched
P01011	TYB10_HUMAN	Thymosin beta-10	3	Snail Heavy	Snail - Unenriched
Q96L14	UB2L3_HUMAN	Ubiquitin-conjugating enzyme E2 L3	2	Snail Light	Snail - Unenriched
Q96I85	WIZ_HUMAN	Protein Wiz	7	Snail Light	Snail - Unenriched
Q14061	AACT_HUMAN	Alpha-1-antichymotrypsin	4	EV Light	Empty Vector - Unenriched
O75937	C170L_HUMAN	Cep170-like protein	2	EV Light	Empty Vector - Unenriched
O60739	CN144_HUMAN	Putative uncharacterized protein C14orf144	2	EV Light	Empty Vector - Unenriched
Q86SF2	COX17_HUMAN	Cytochrome c oxidase copper chaperone	2	EV Light	Empty Vector - Unenriched
Q6NXT2	DNJC8_HUMAN	DnaJ homolog subfamily C member 8	3	EV Light	Empty Vector - Unenriched
Q9Y4Y9	EIF1B_HUMAN	Eukaryotic translation initiation factor 1b	4	EV Light	Empty Vector - Unenriched
Q8NGI2	GALT7_HUMAN	N-acetylgalactosaminyltransferase 7	6	EV Light	Empty Vector - Unenriched
Q9H4M7	H3C_HUMAN	Histone H3.3C	19	EV Light	Empty Vector - Unenriched
Q96PU8	LSM5_HUMAN	U6 snRNA-associated Sm-like protein LSm5	1	EV Heavy	Empty Vector - Unenriched
O75880	O52N4_HUMAN	Olfactory receptor 52N4	2	EV Light	Empty Vector - Unenriched
Q96DR4	PKHA4_HUMAN	Pleckstrin homology domain-containing family A member 4	8	EV Light	Empty Vector - Unenriched
Q15363	QKI_HUMAN	Protein quaking	3	EV Light	Empty Vector - Unenriched
Q9NQA5	SCO1_HUMAN	Protein SCO1 homolog, mitochondrial	5	EV Light	Empty Vector - Unenriched
Q9BXU2	STAR4_HUMAN	StAR-related lipid transfer protein 4	5	EV Light	Empty Vector - Unenriched
Q86XK7	TMED2_HUMAN	Transmembrane emp24 domain-containing protein 2	3	EV Light	Empty Vector - Unenriched
	TRPV5_HUMAN	Transient receptor potential cation channel subfamily V member 5	4	EV Heavy	Empty Vector - Unenriched
	TX13B_HUMAN	Testis-expressed sequence 13B protein	4	EV Light	Empty Vector - Unenriched
	VSIG1_HUMAN	V-set and immunoglobulin domain-containing protein 1	2	EV Light	Empty Vector - Unenriched
